# Supplementary material
Source: MDPI journal article supplement (https://www.mdpi.com/2076-3417/12/23/12092)

## Supplementary Files

This file contains plots supplementary to the article [1].

- The vertical axis is sound pressure level in dB(C) at 0.3 m.
- The horizontal axis is fundamental frequency  $f_0$  in semitones on the MIDI scale, where  $60=261.6$  Hz (“middle C”).
- Each ‘pixel’ or cell in the maps is 1 semitone wide and 1 dB tall.

Acoustic metrics are labelled as

“Crest” = crest factor

“SpecBal” = spectrum balance (dB)

“CPPs” = cepstral peak prominence smoothed (dB)

EKG metrics are labelled as

“Entropy” = cycle-rate sample entropy (CSE) (arbitrary units)

“dEKGmax” =  $Q_{\Delta}$  (normalized maximum EKG slope)

“Qcontact” =  $Q_{ci}$  (quotient of contact by integration)

The data were originally collected for the study of Patel and Ternström [2].

## Reference

1. Cai, H.; Ternström, S. Mapping Phonation Types by Clustering of Multiple Metrics. *Appl. Sci.* 2022, 12, 12092. <https://doi.org/10.3390/app122312092>
2. Patel, R.R.; Ternstrom, S. Quantitative and Qualitative Electroglottographic Wave Shape Differences in Children and Adults Using Voice Map-Based Analysis. *J. Speech Lang. Hear. Res.* 2021, 64, 2977–2995. [https://doi.org/10.1044/2021\\_JSLHR-20-00717](https://doi.org/10.1044/2021_JSLHR-20-00717).

Figure S1: Classification voice maps for participant M01

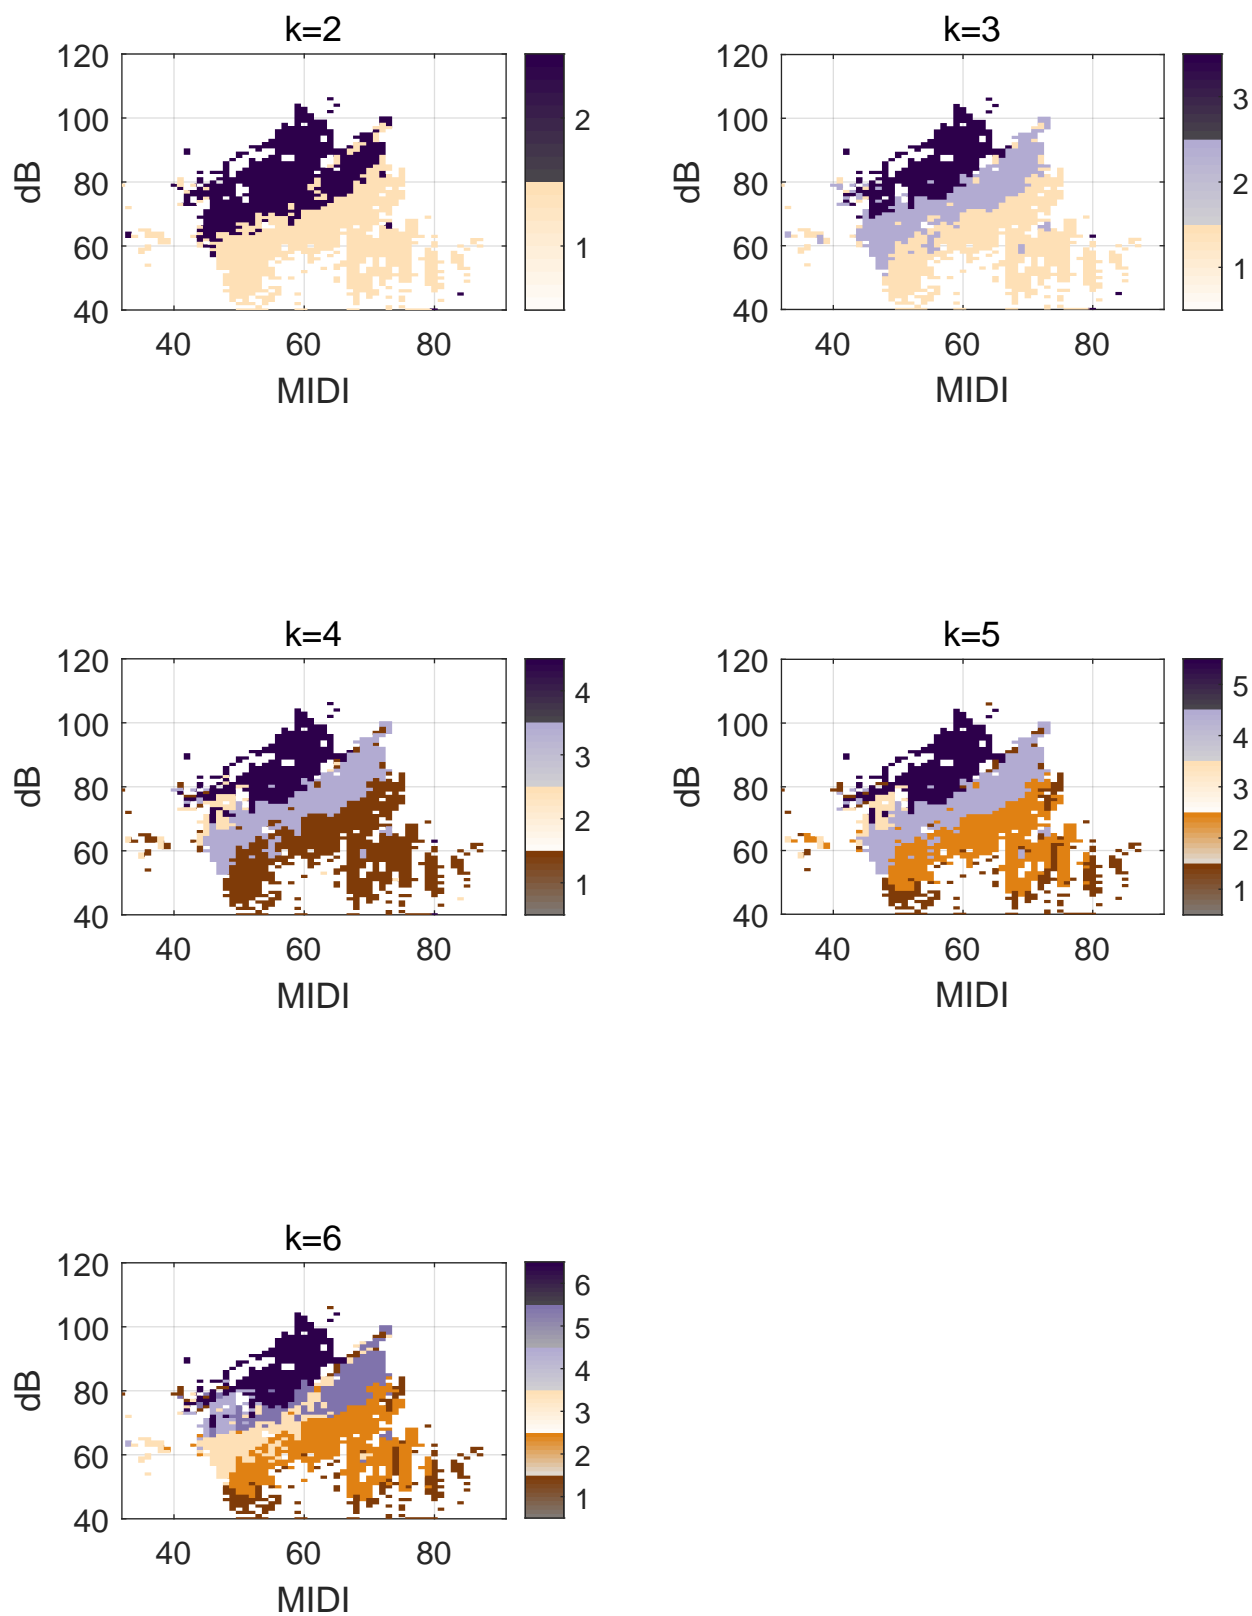

Figure S2: Acoustic and EGG Metric maps for participant M01

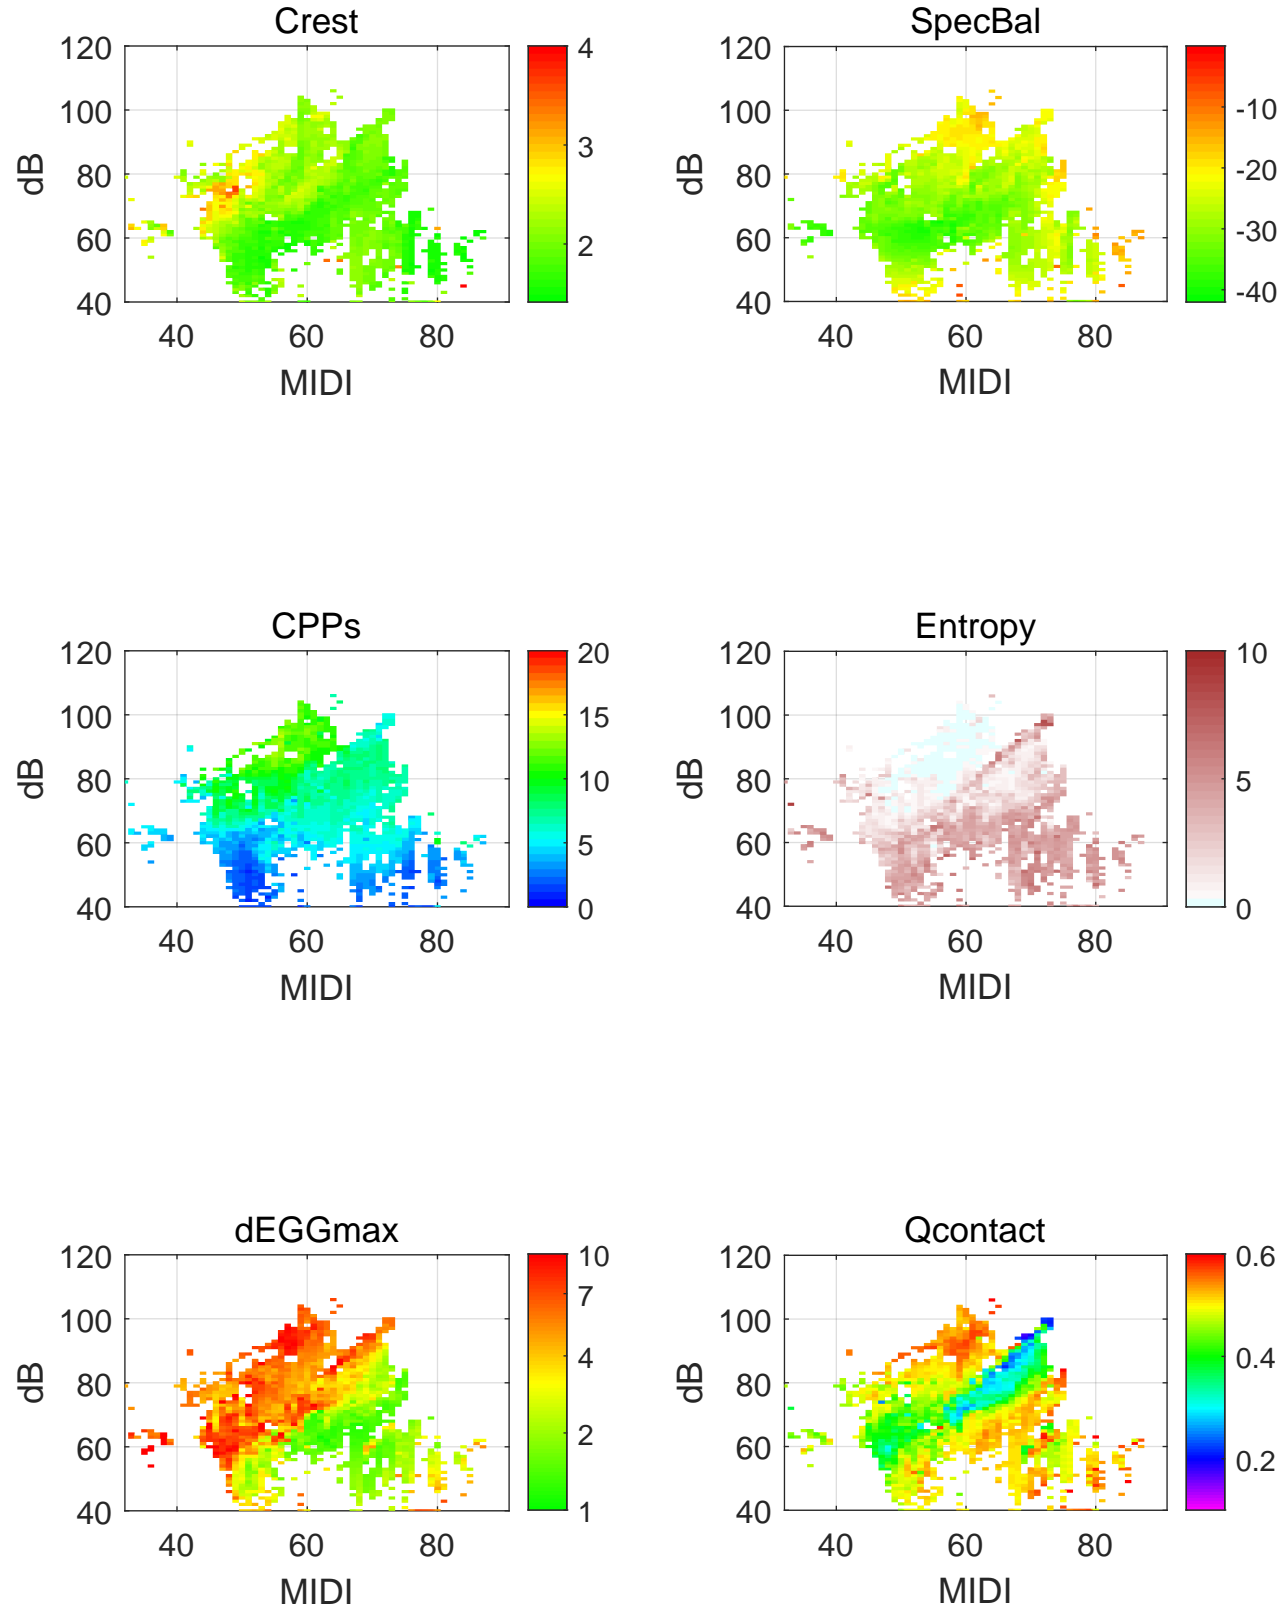

Figure S3: Classification voice maps for participant M02

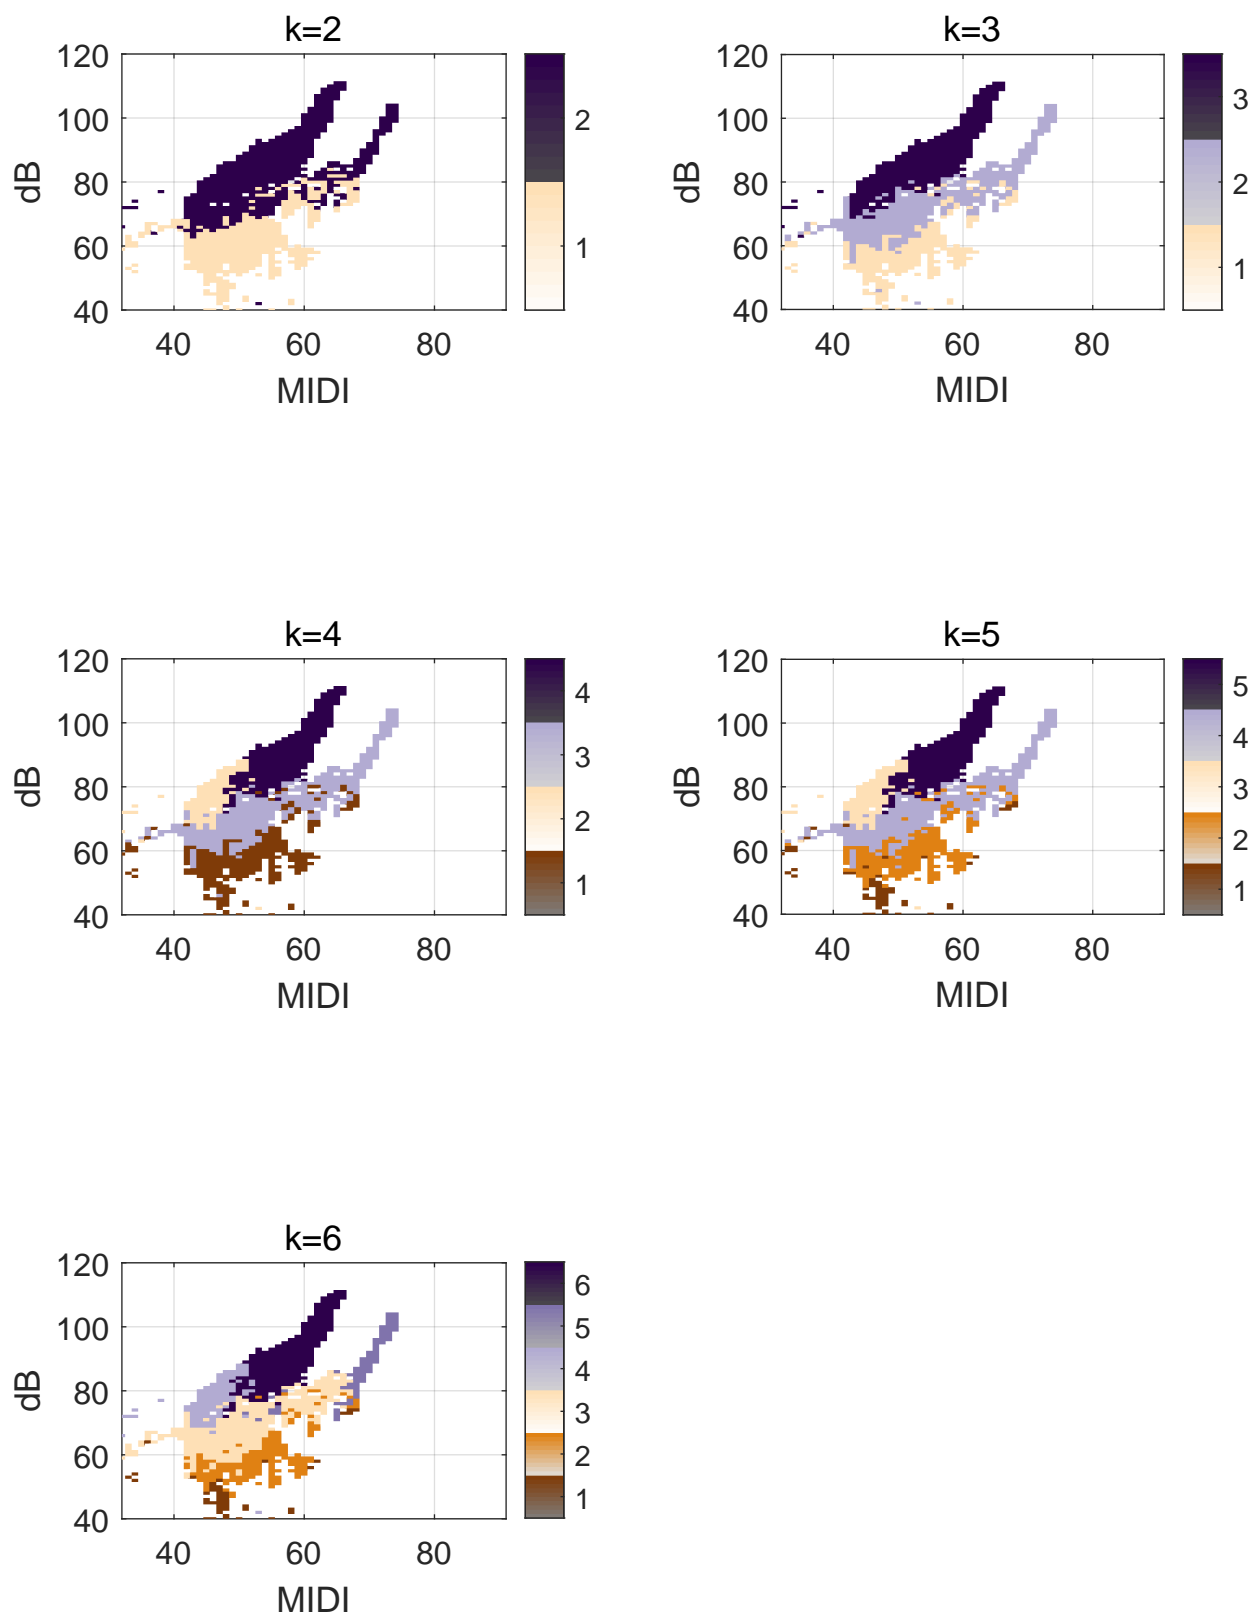



Figure S4: Acoustic and EGG Metric maps for participant M02

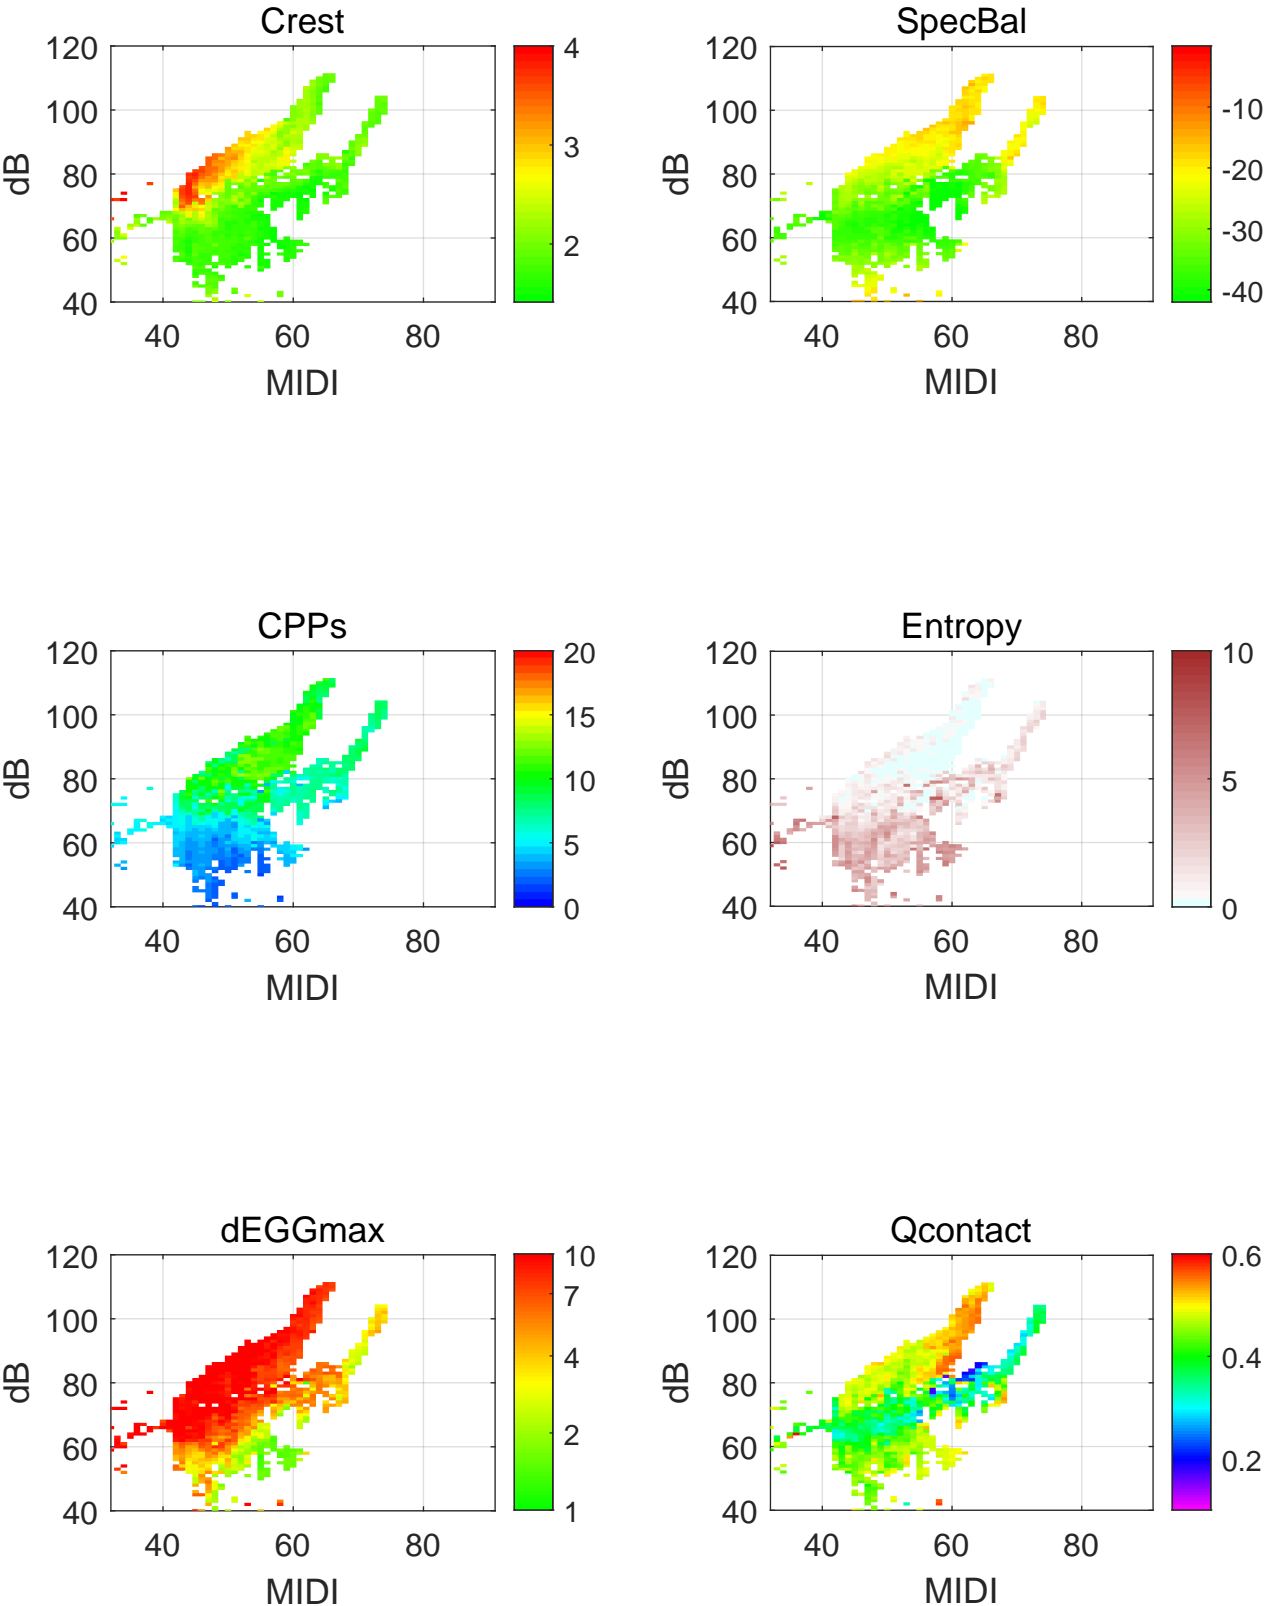

Figure S5: Classification voice maps for participant M03

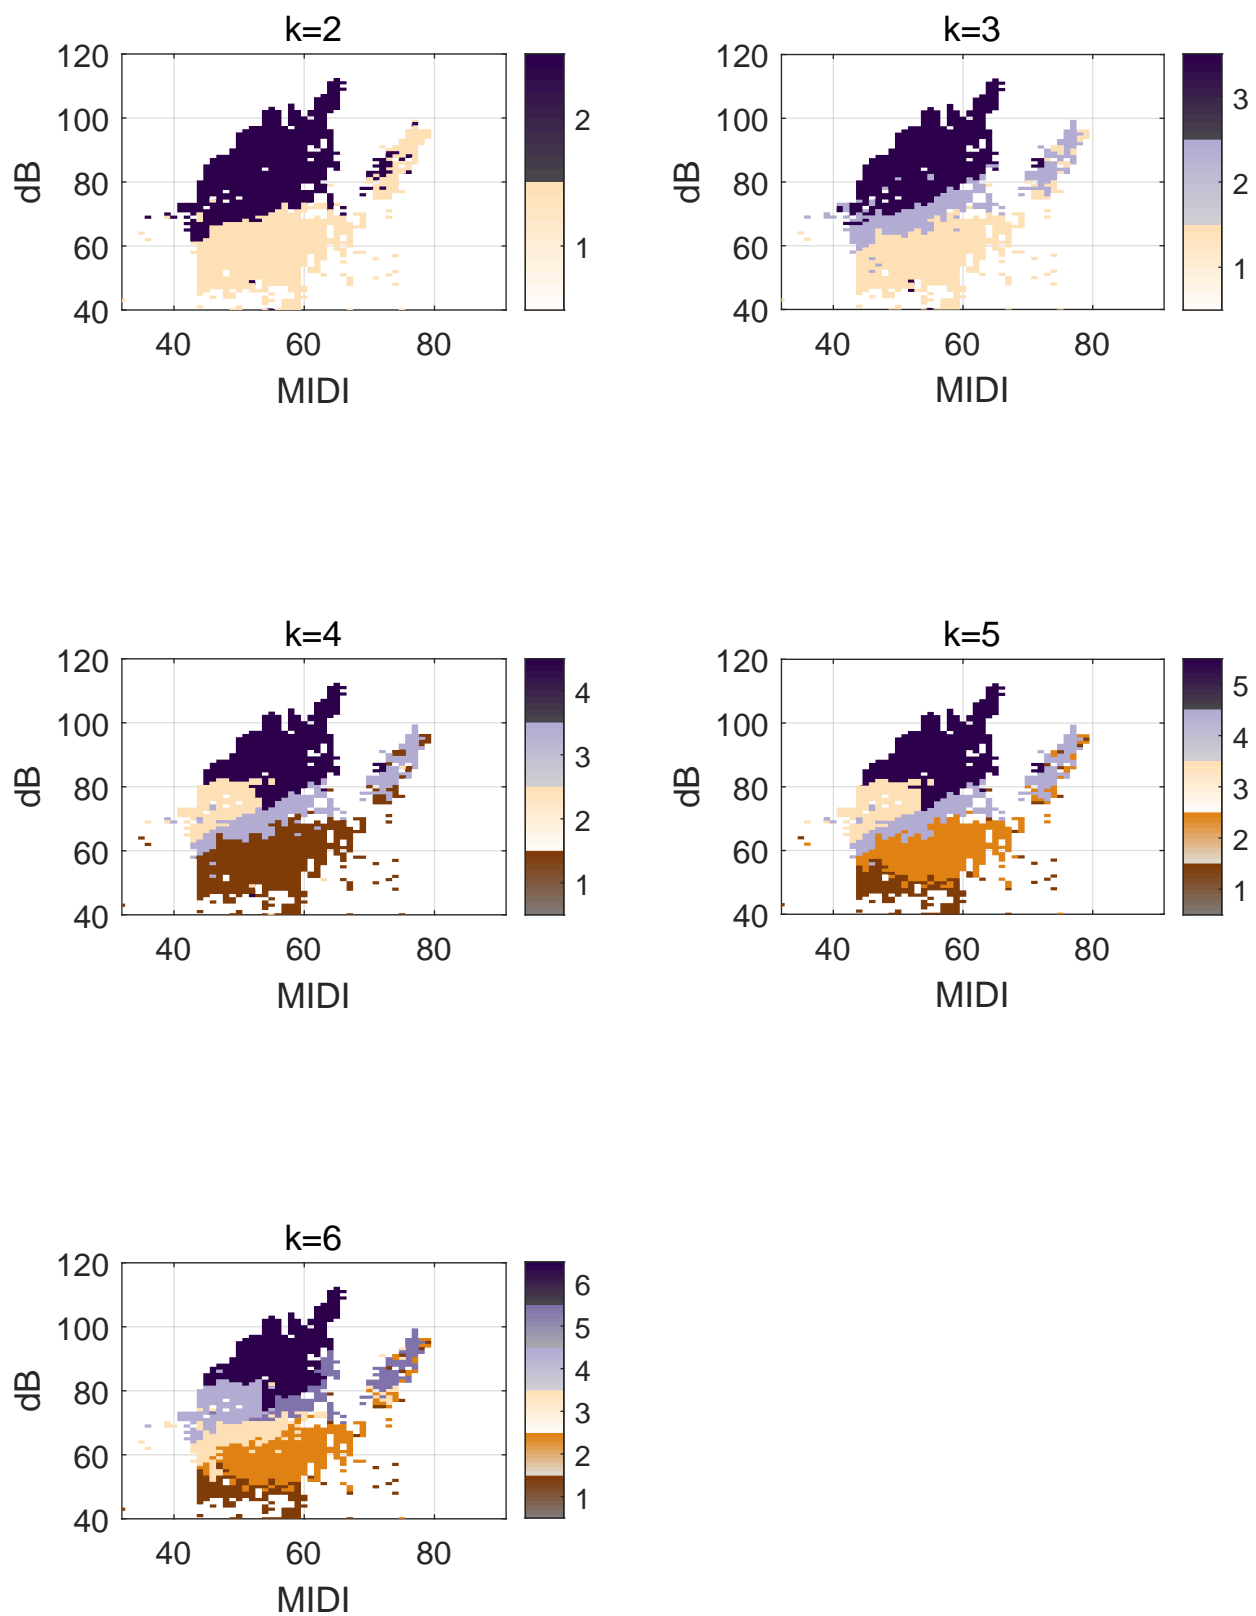

Figure S6: Acoustic and EGG Metric maps for participant M03

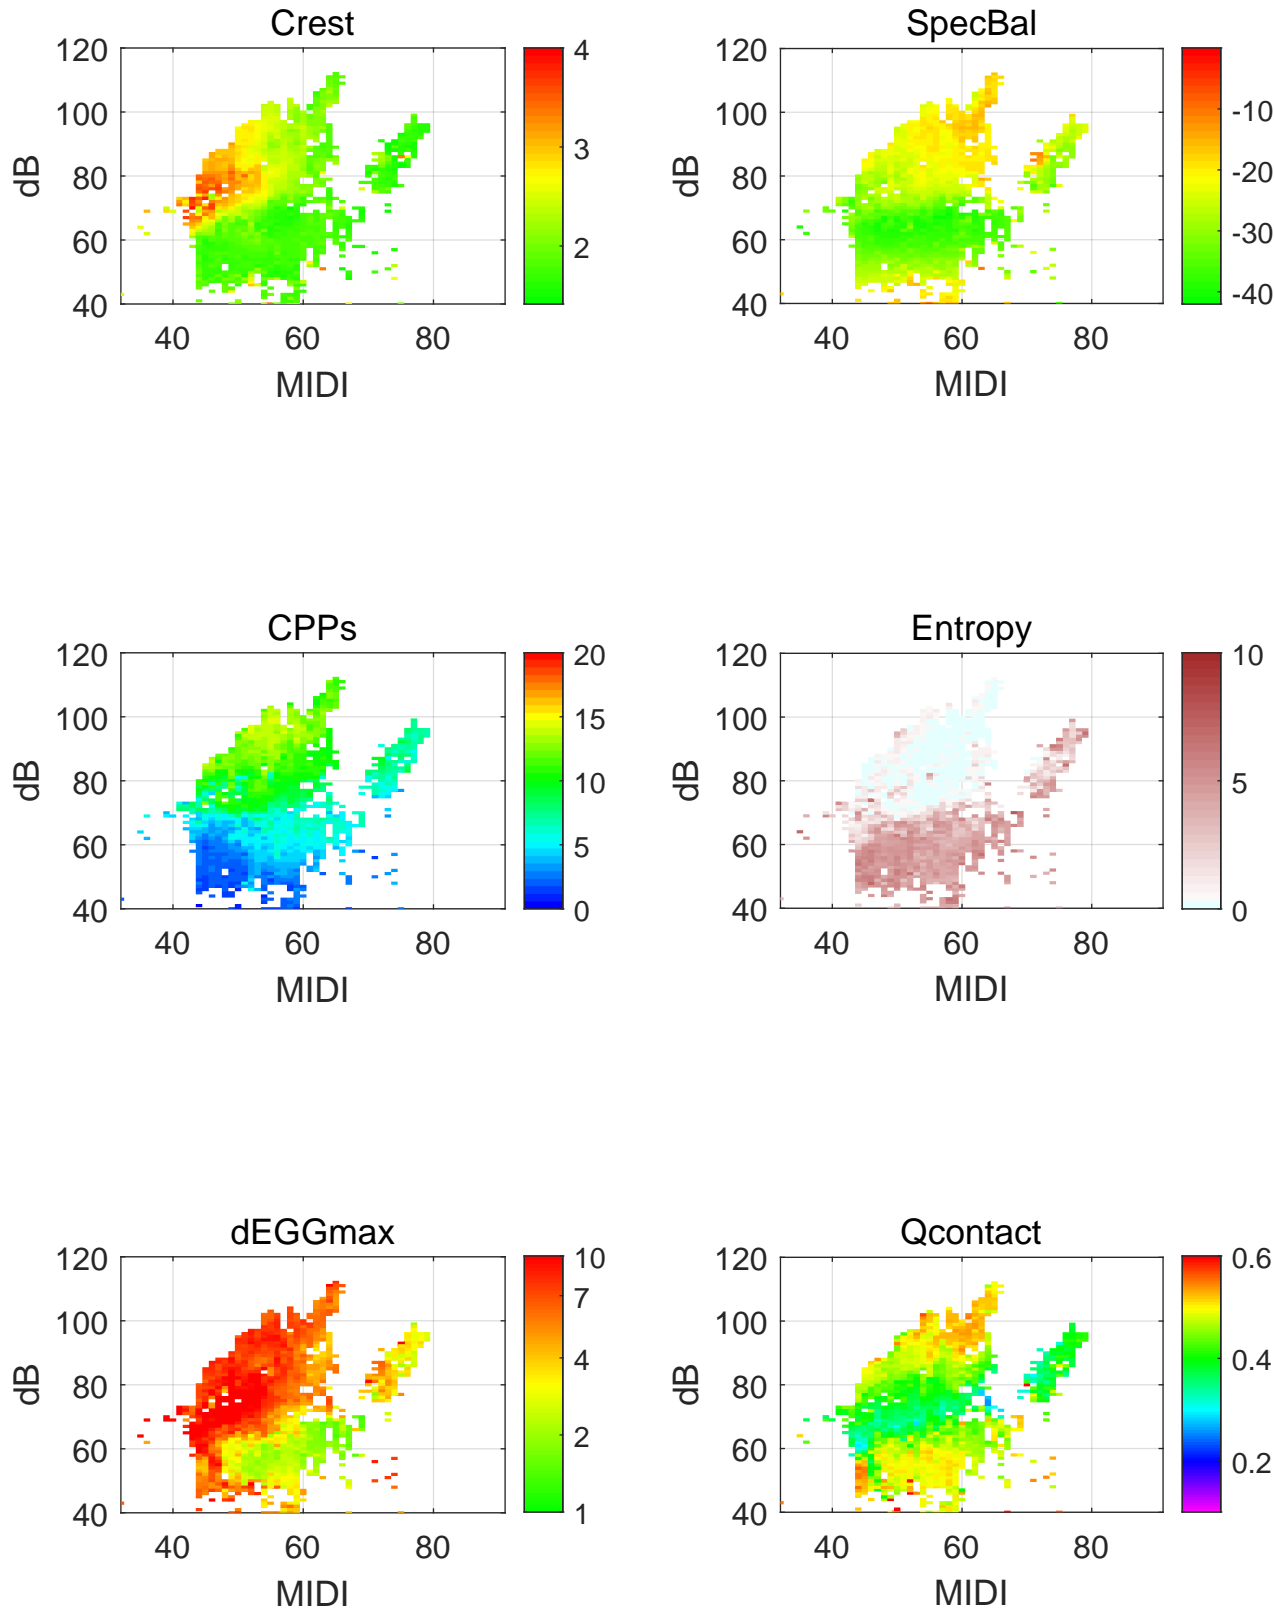

Figure S7: Classification voice maps for participant M04

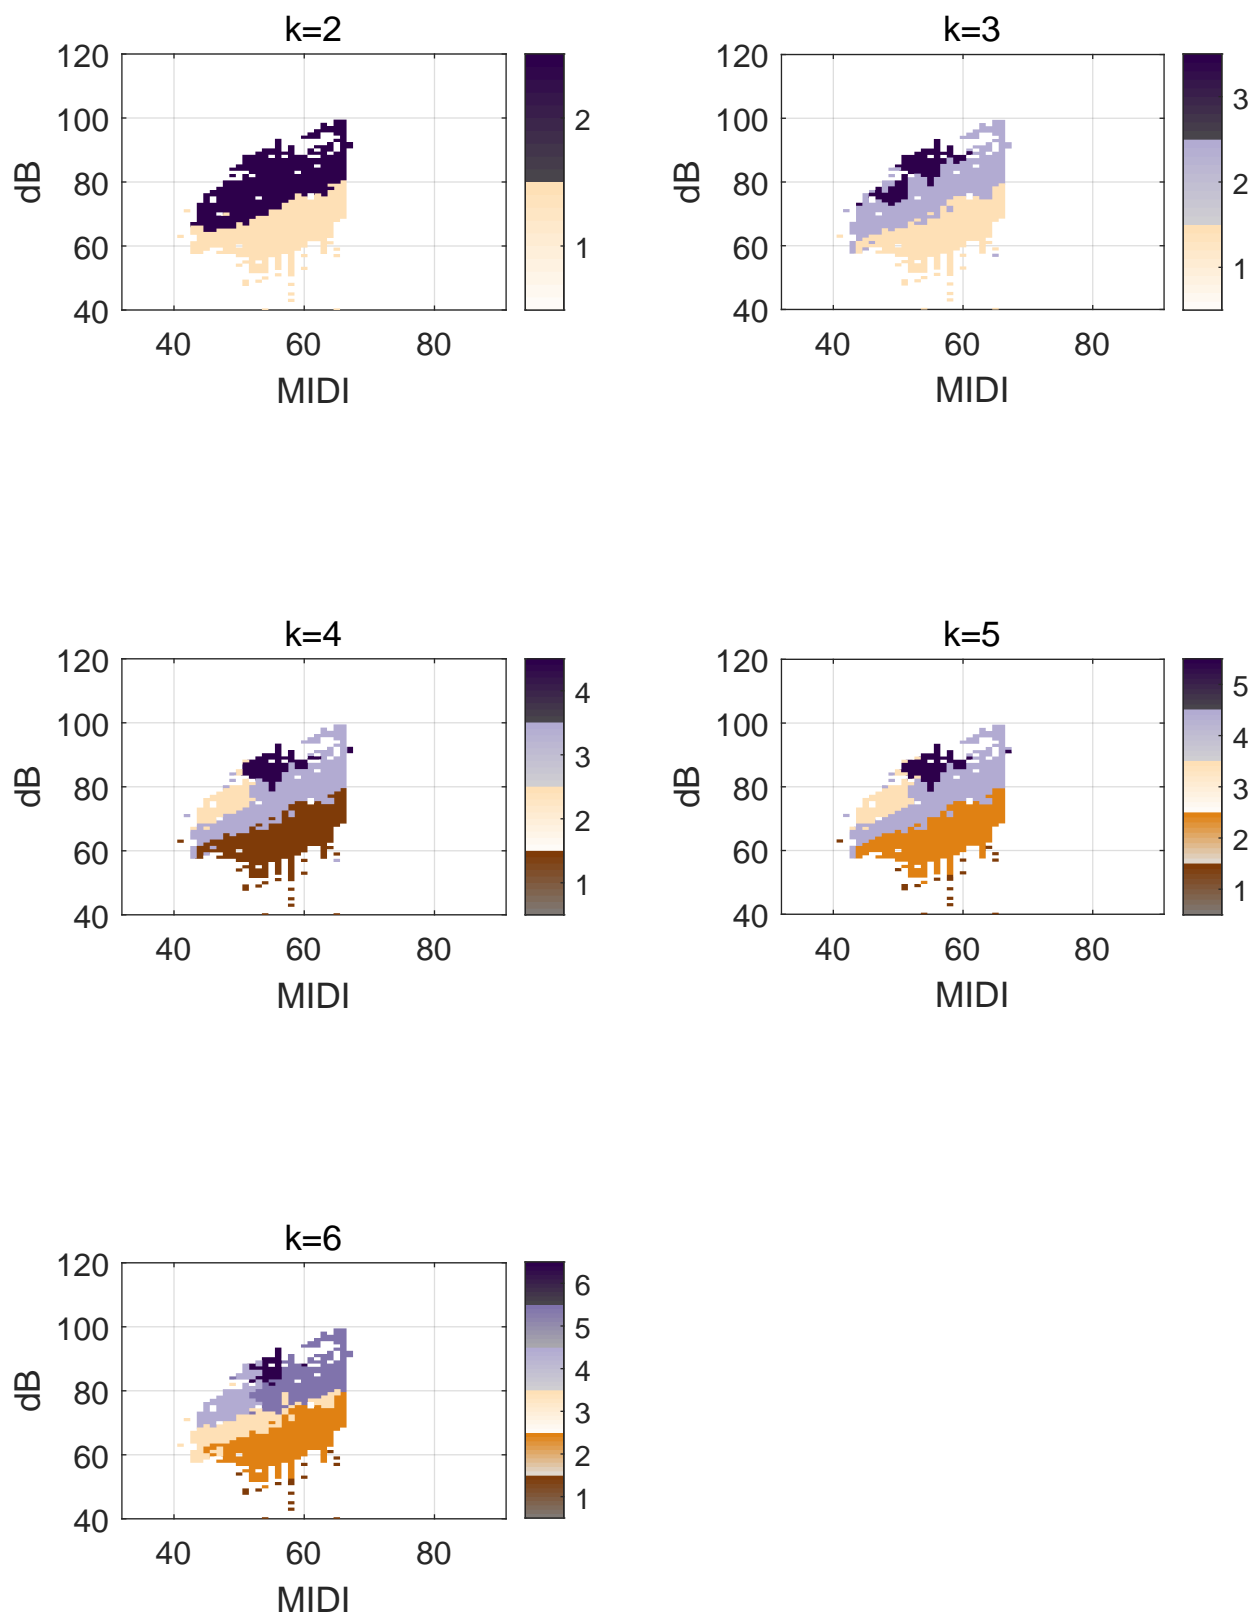

Figure S8: Acoustic and EGG Metric maps for participant M04

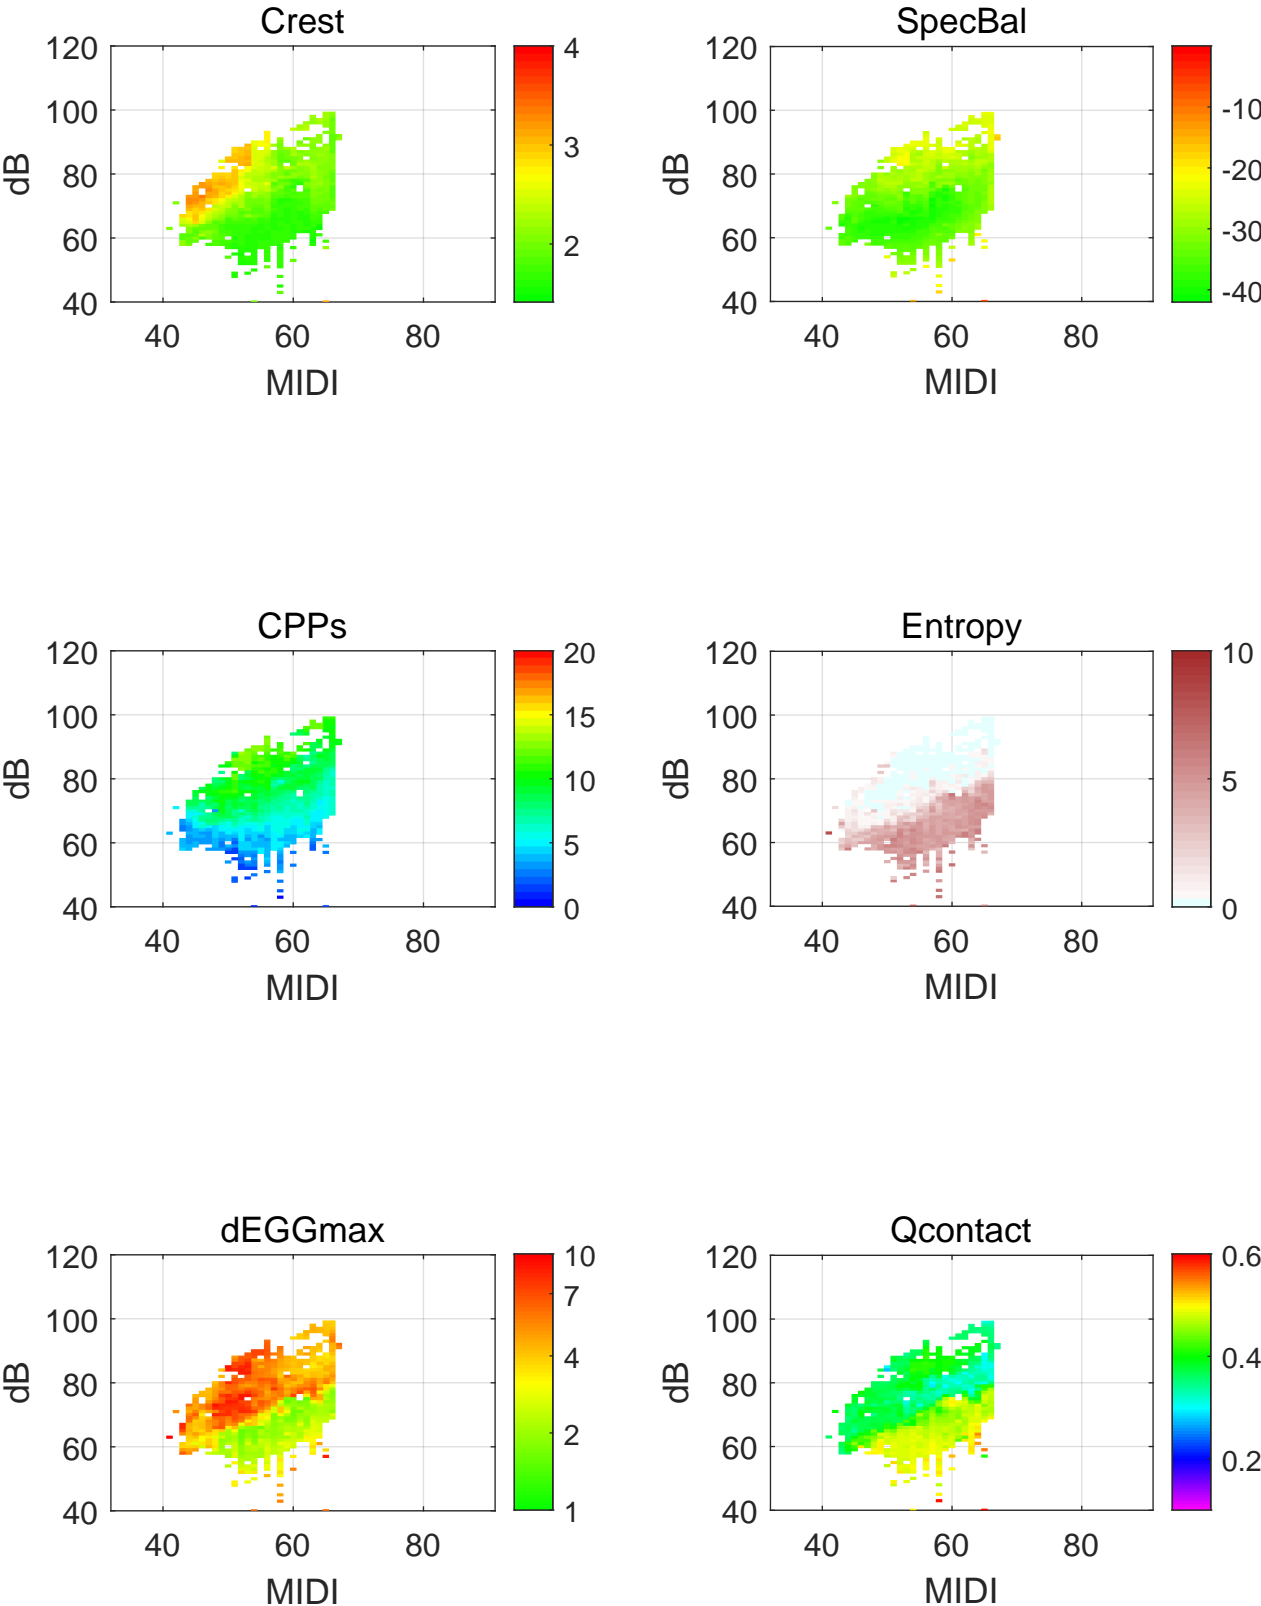

Figure S9: Classification voice maps for participant M05

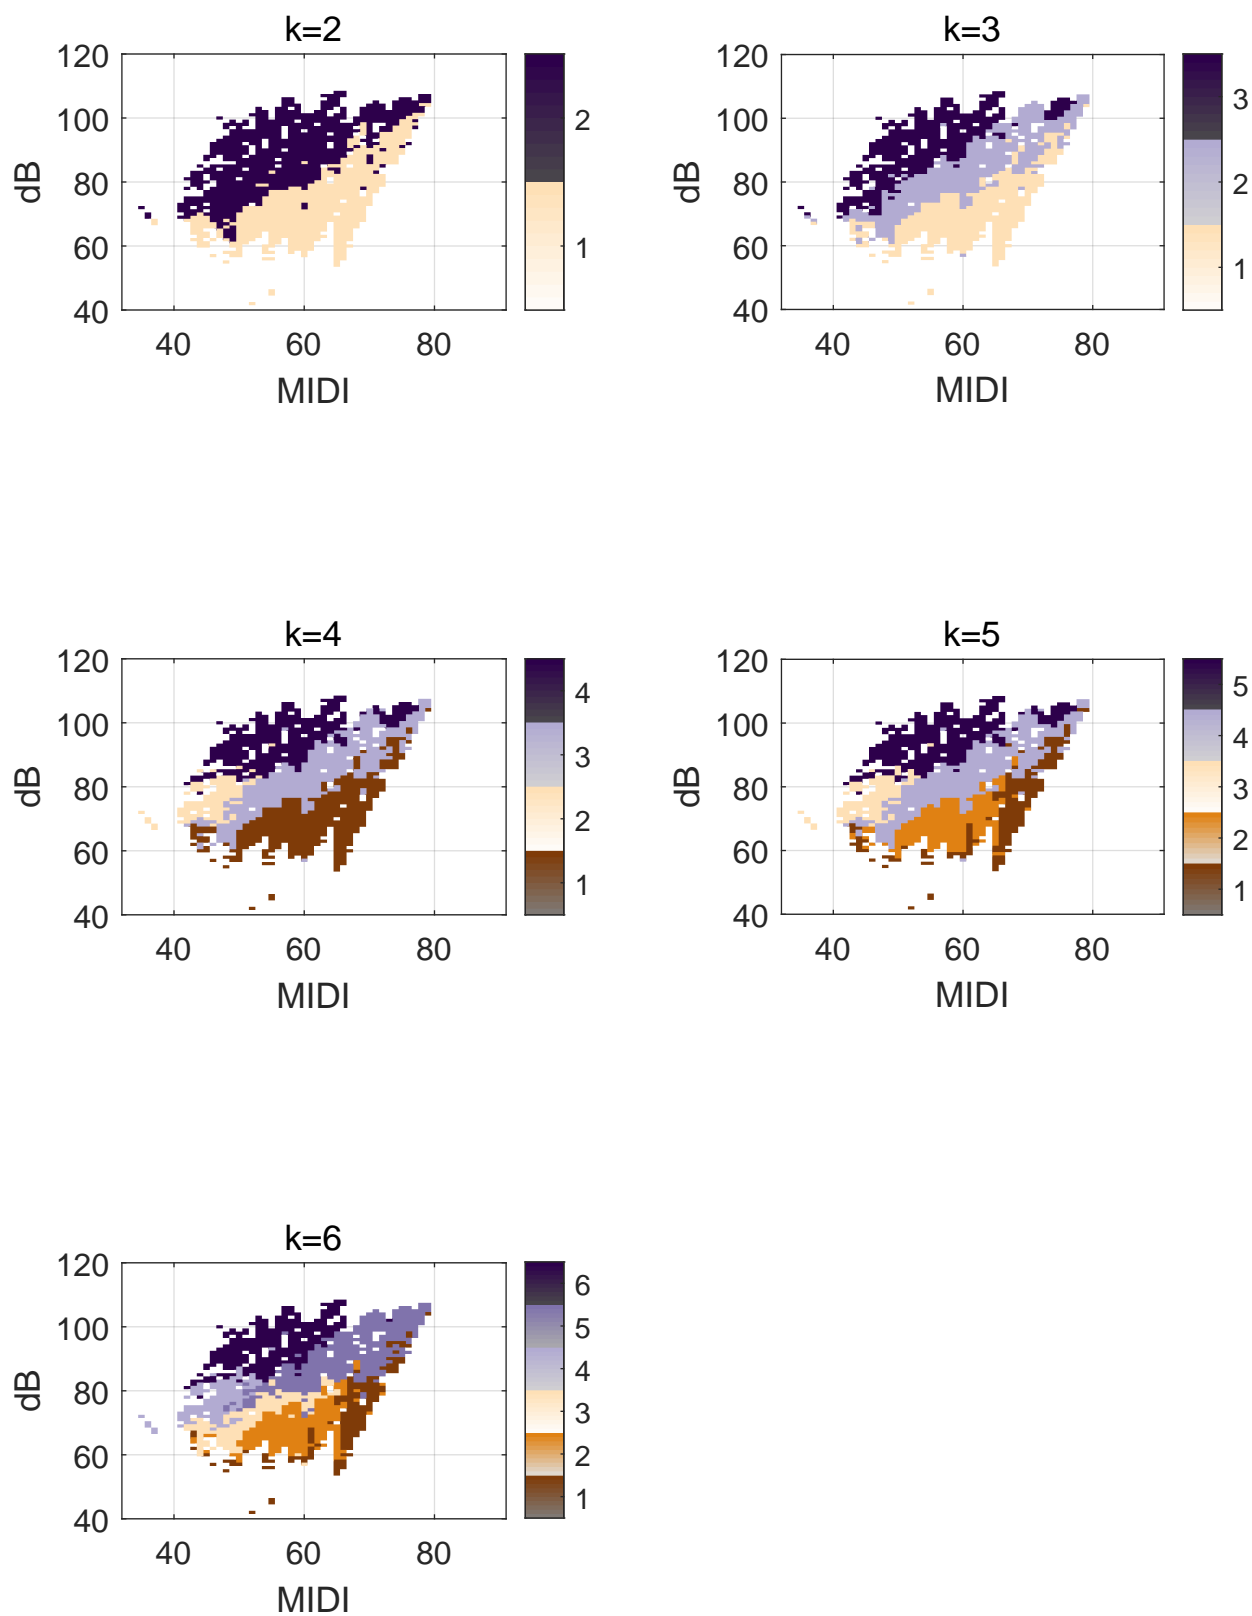

Figure S10: Acoustic and EGG Metric maps for participant M05

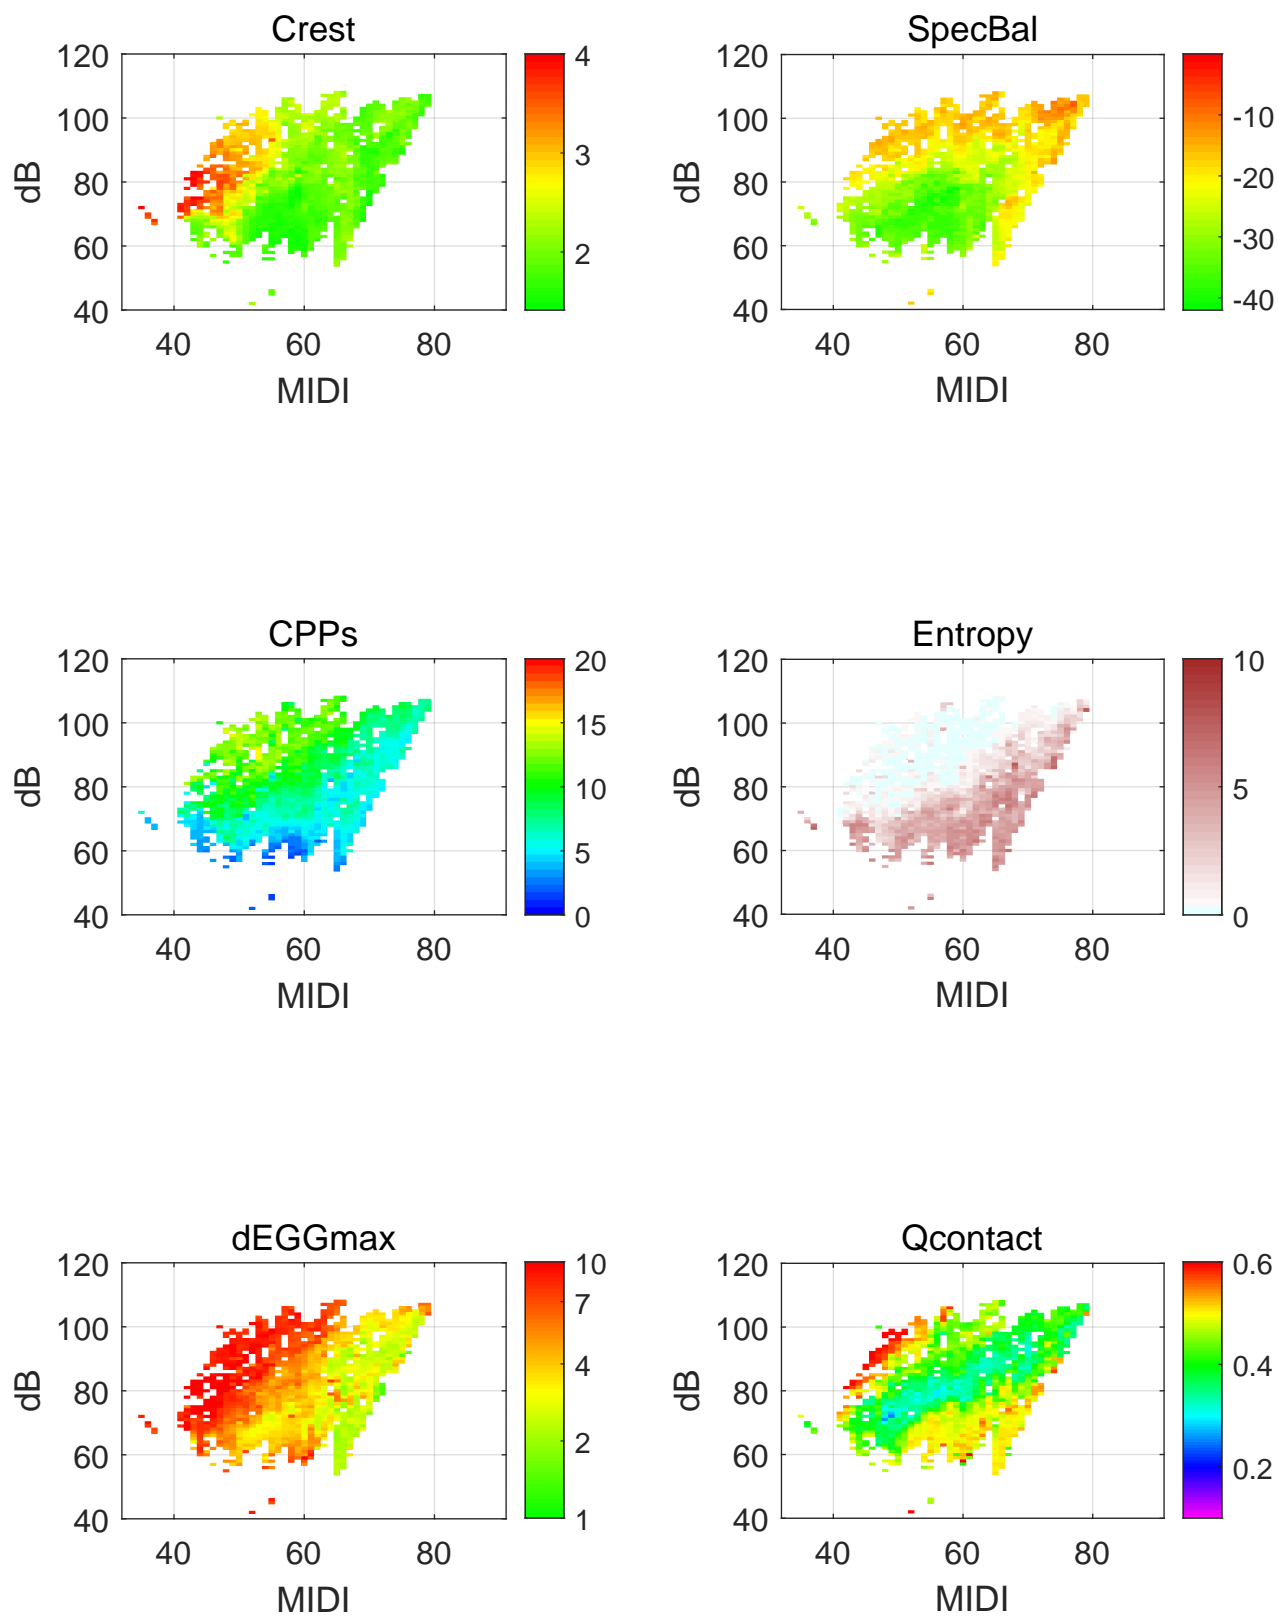

Figure S11: Classification voice maps for participant M06

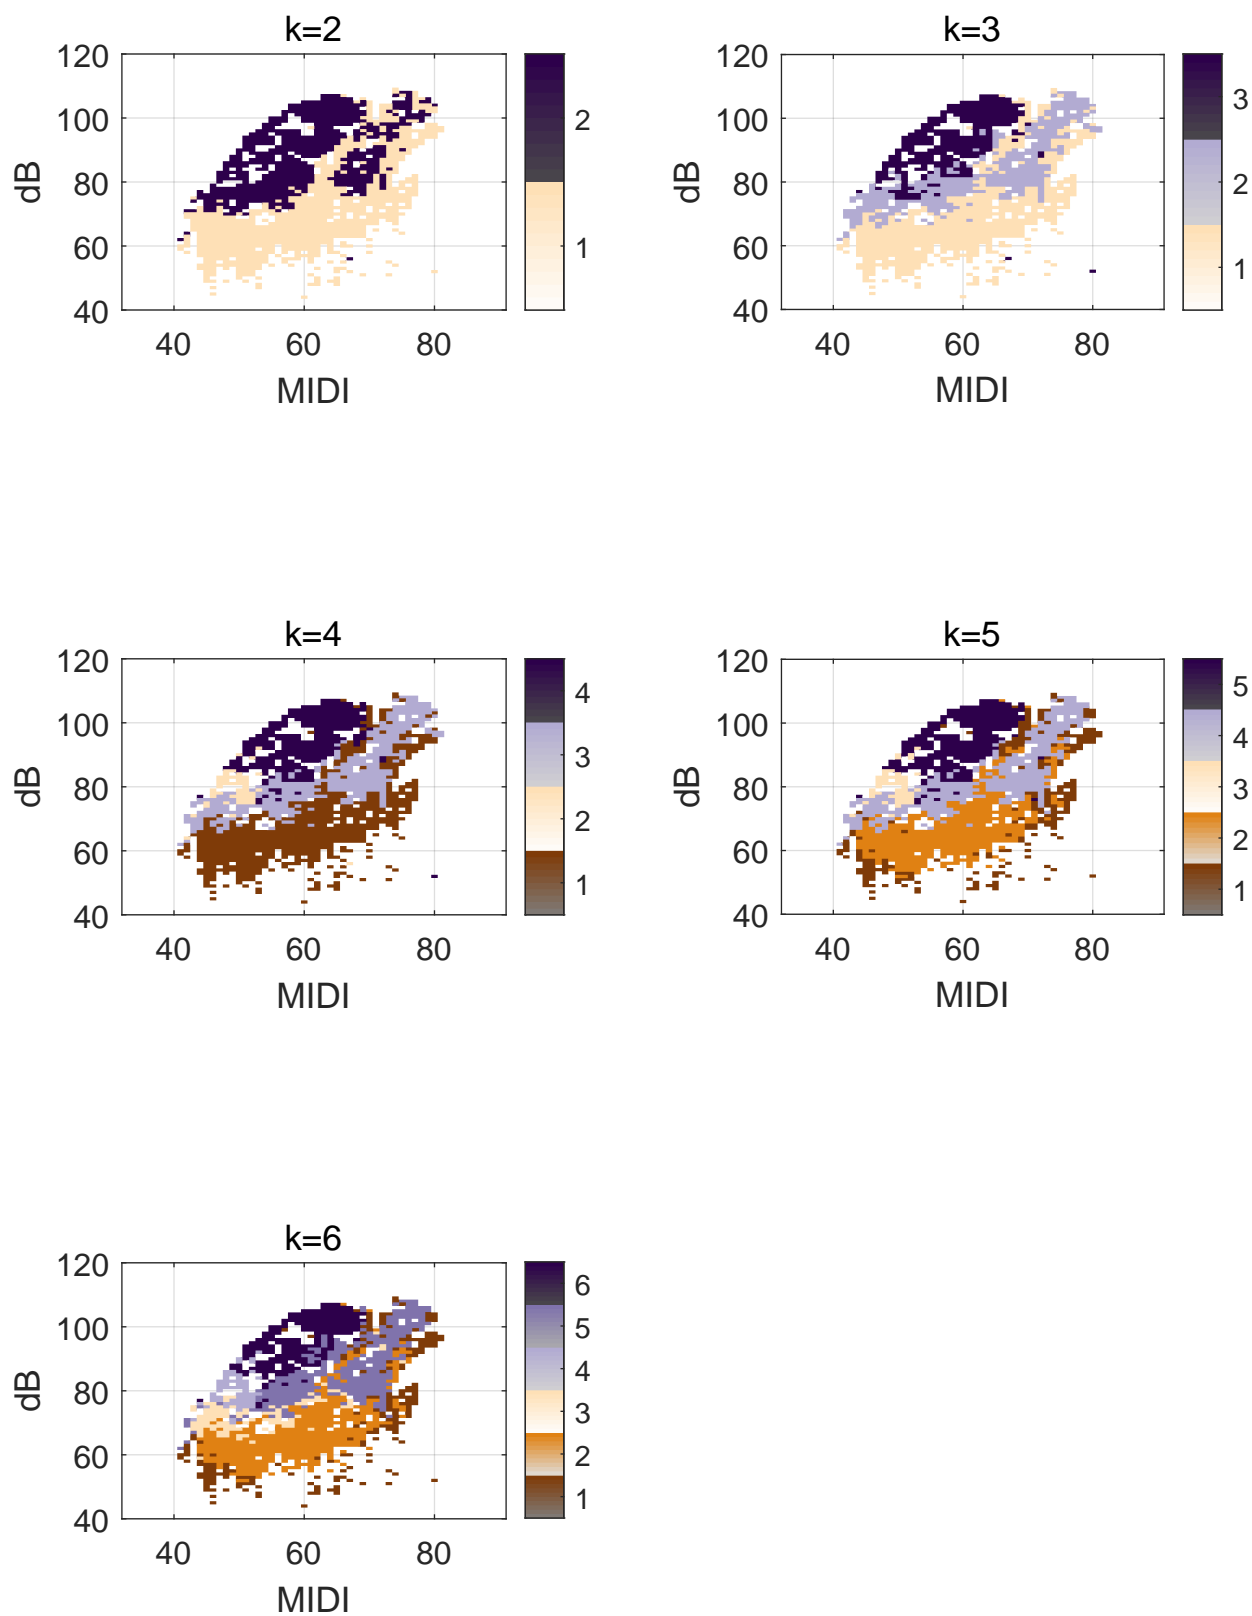



Figure S12: Acoustic and EGG Metric maps for participant M06

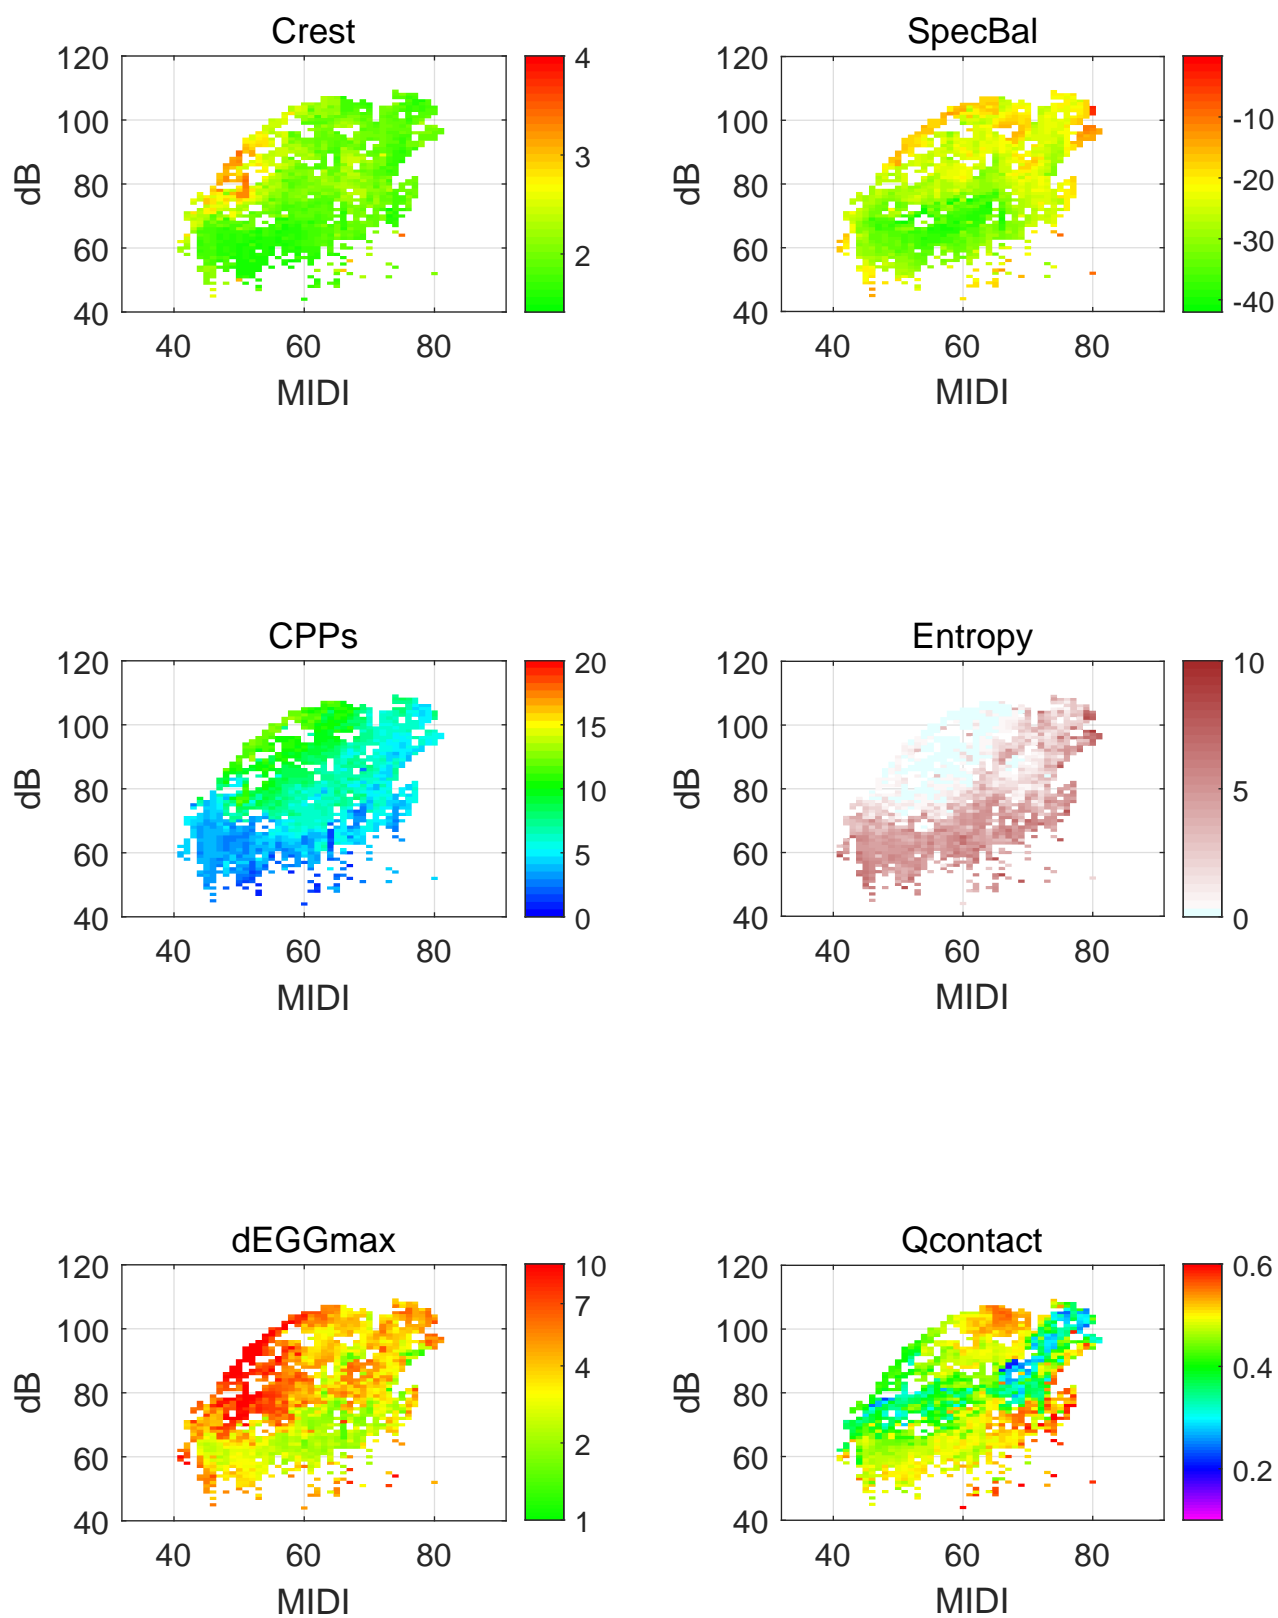

Figure S13: Classification voice maps for participant M07

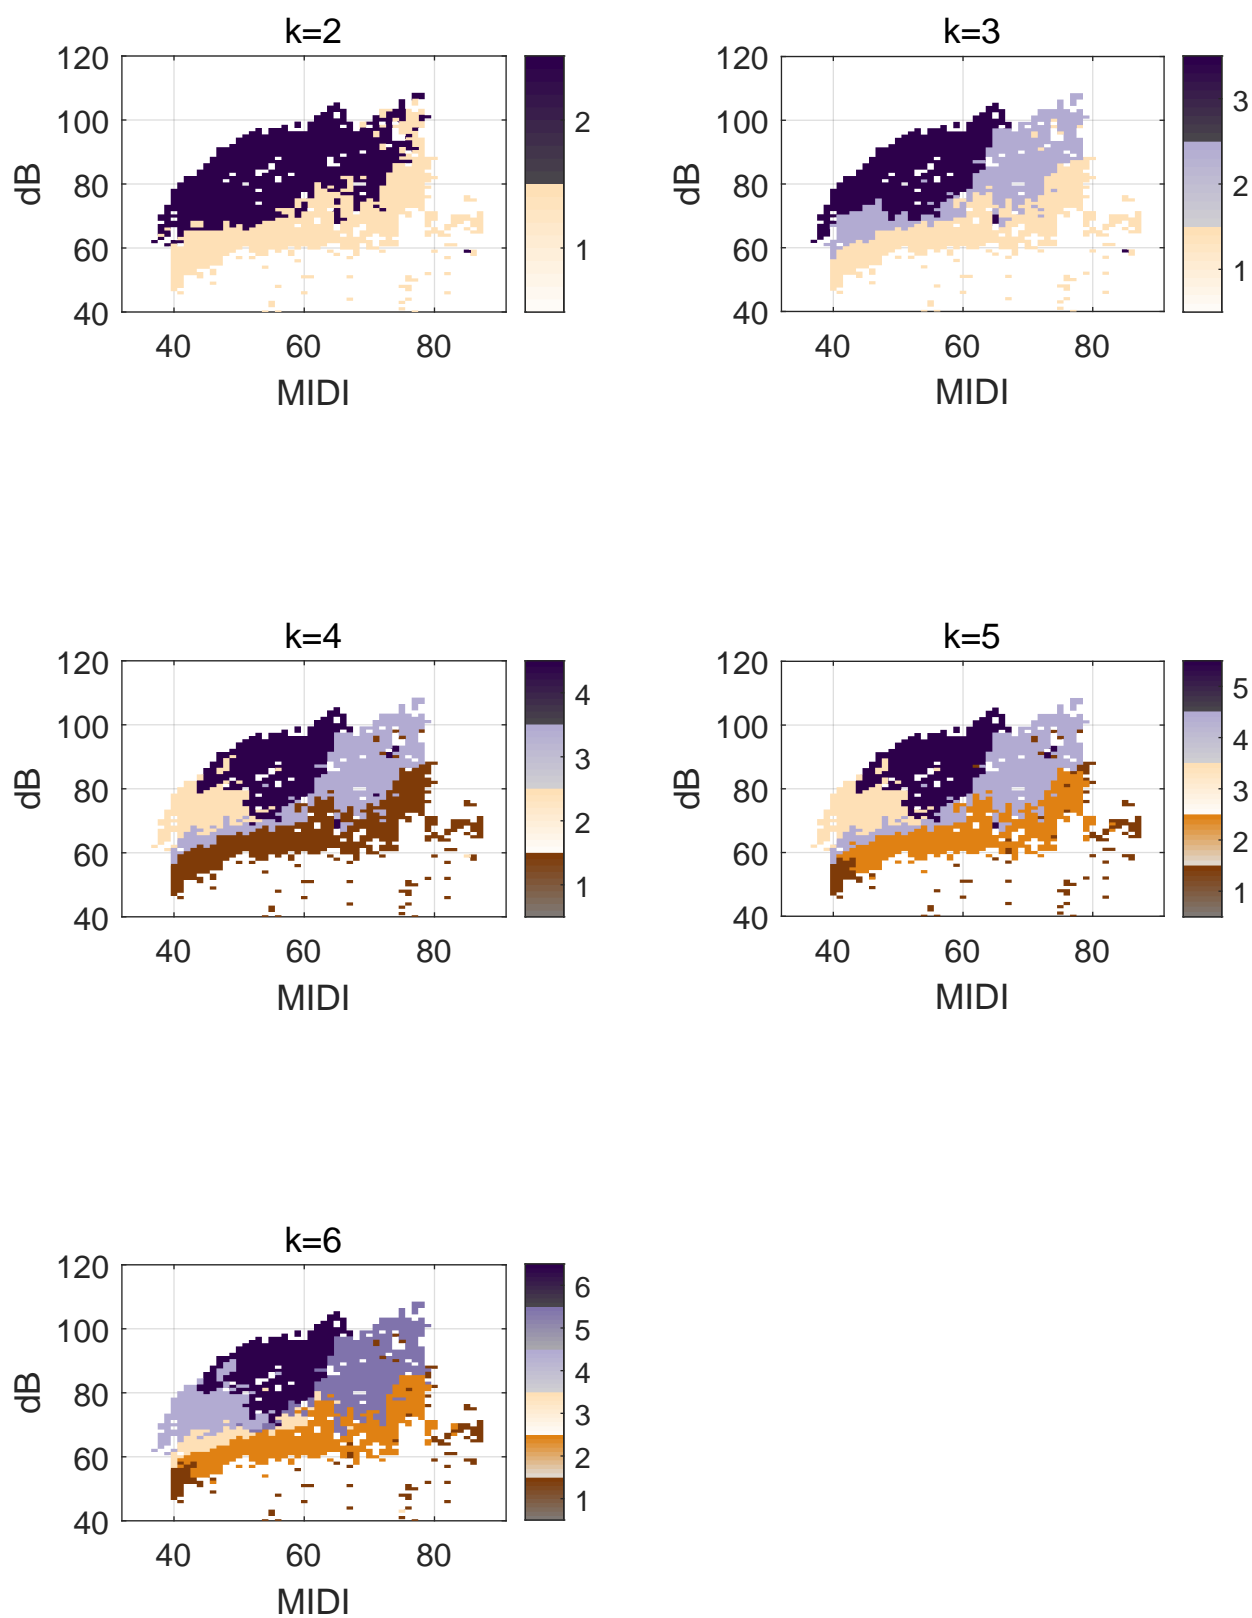

Figure S14: Acoustic and EGG Metric maps for participant M07

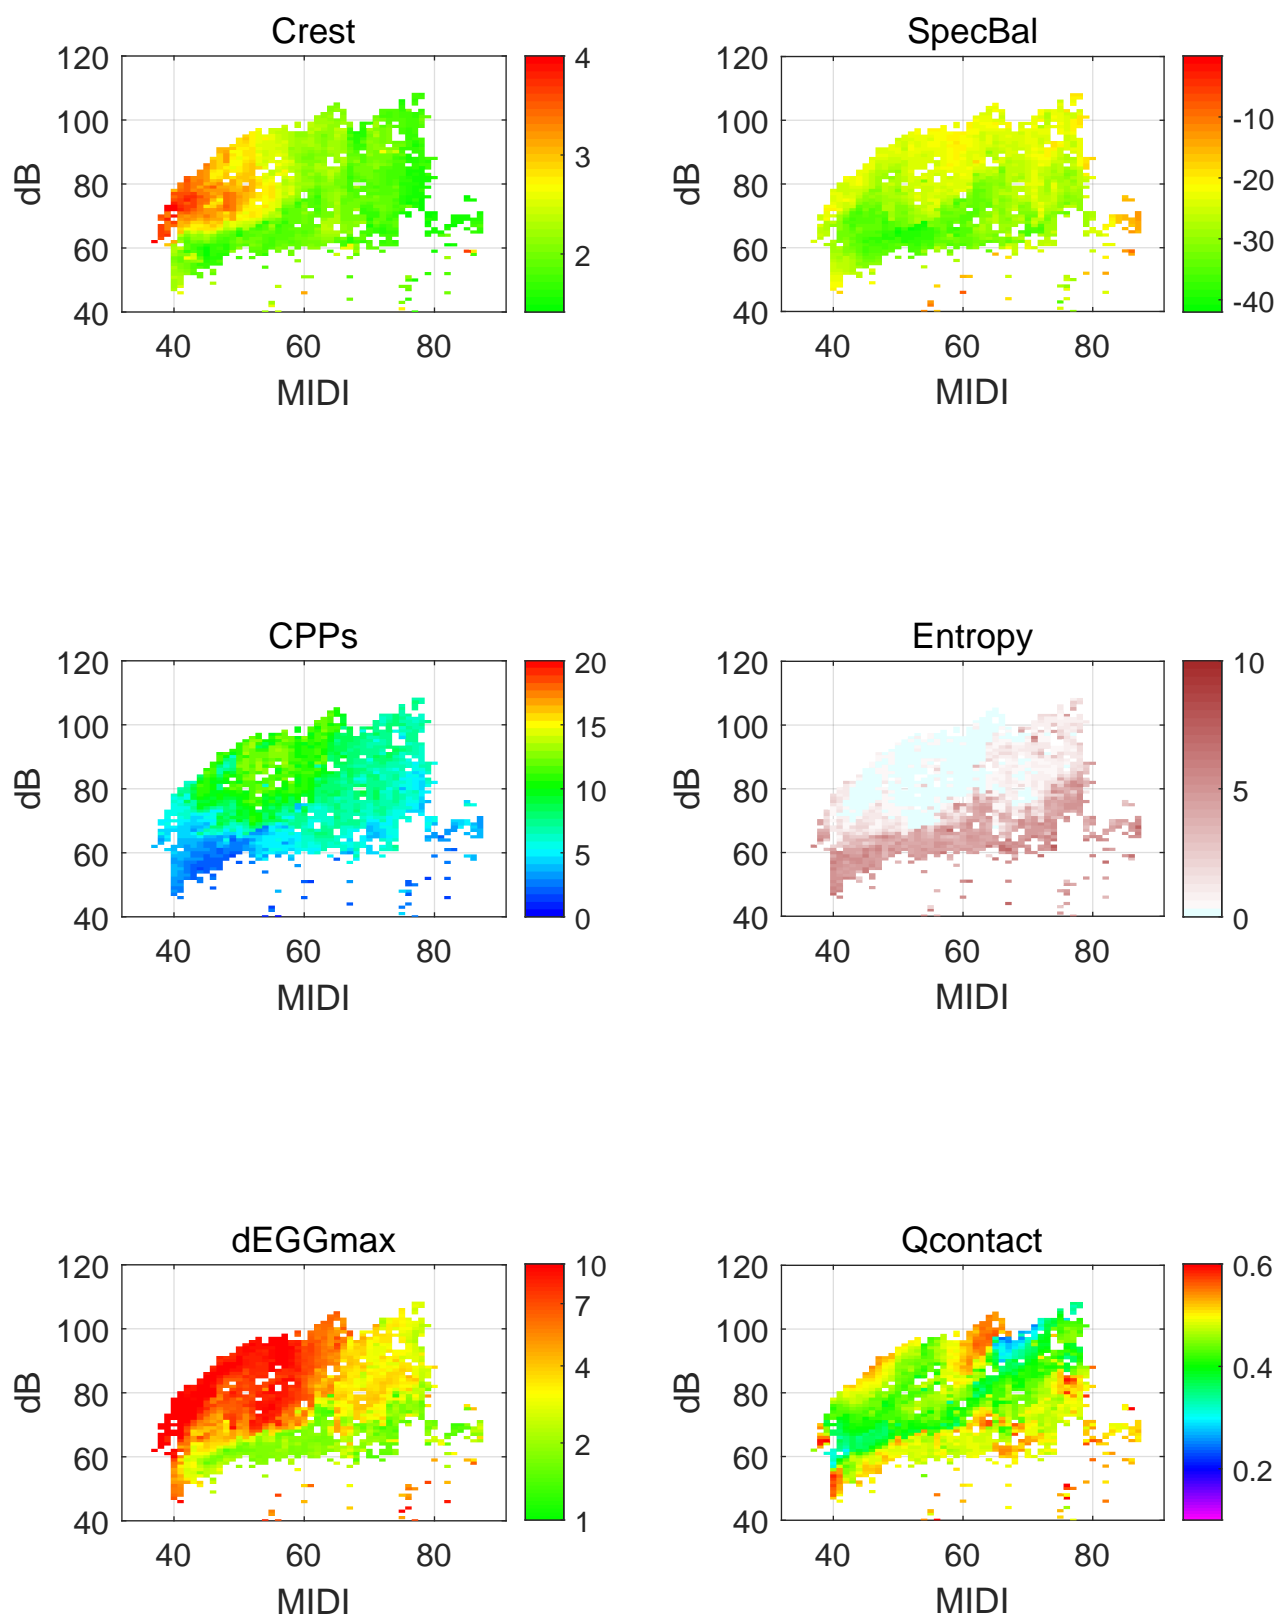

Figure S15: Classification voice maps for participant M08

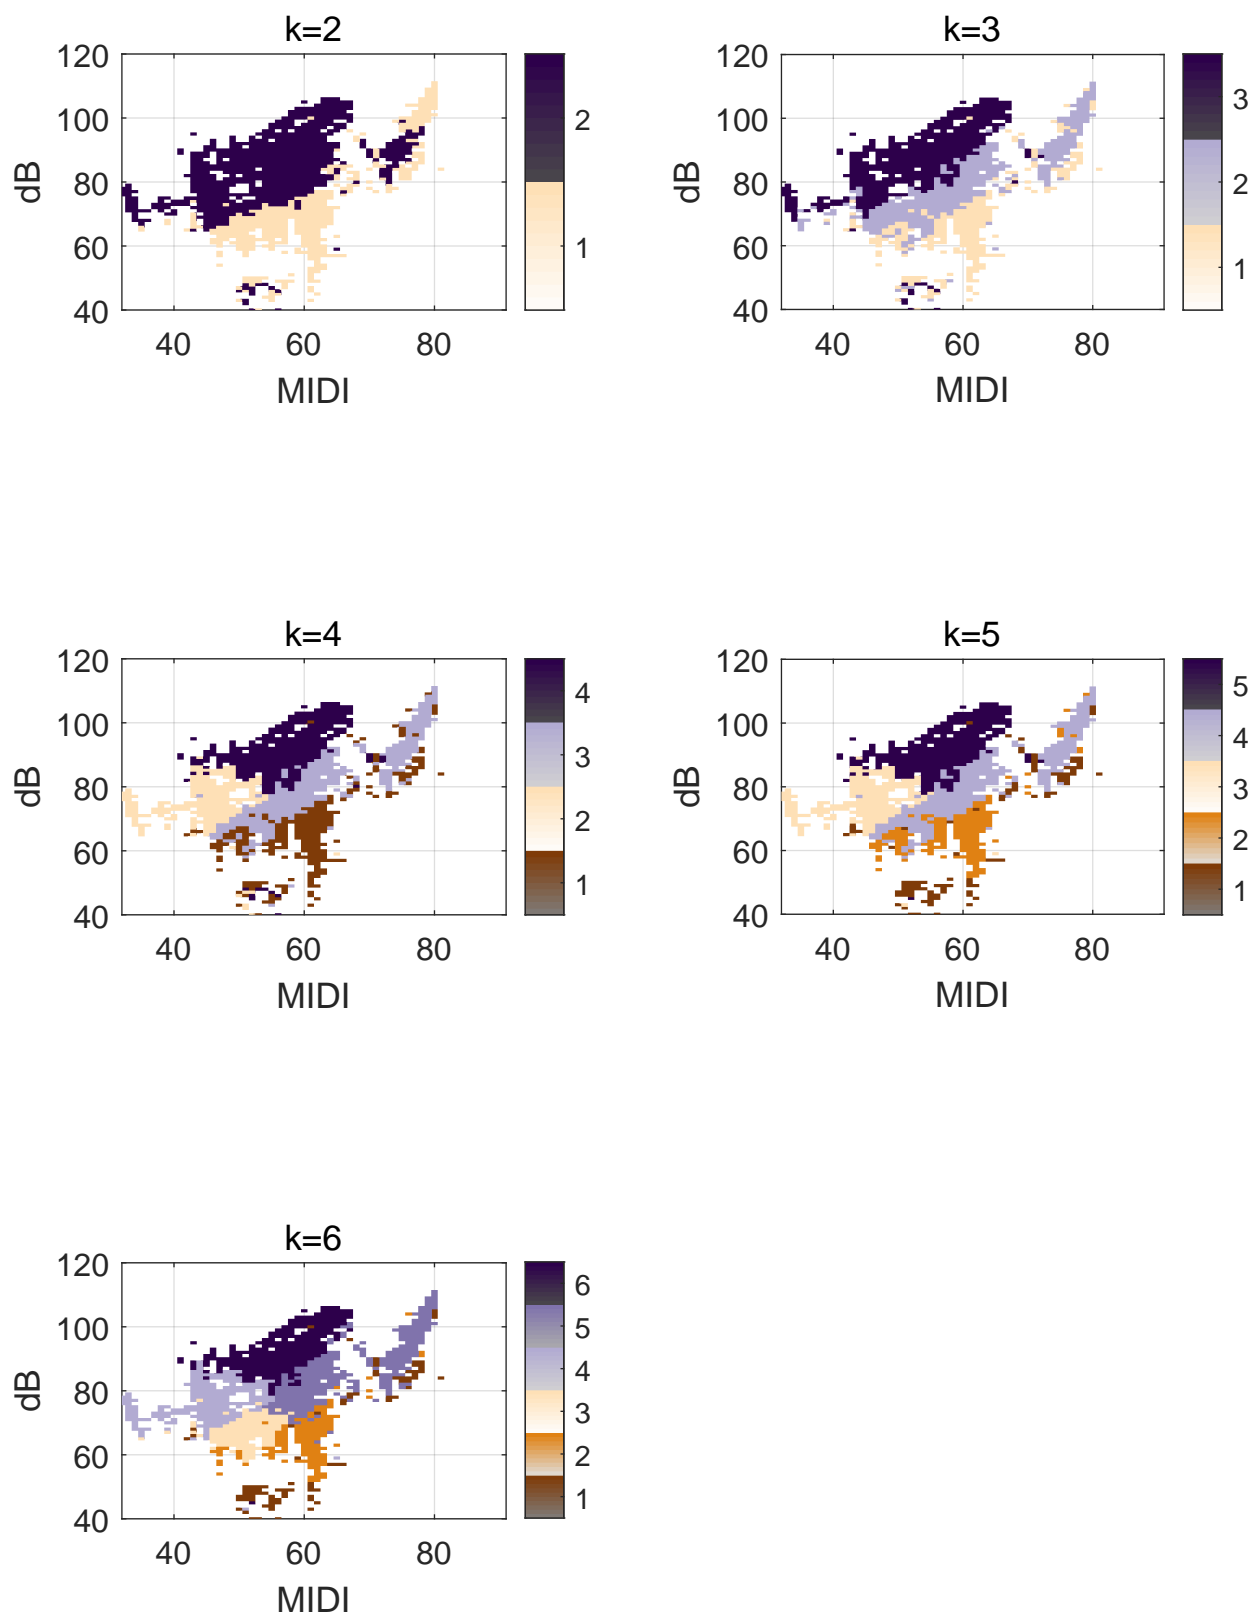

Figure S16: Acoustic and EGG Metric maps for participant M08

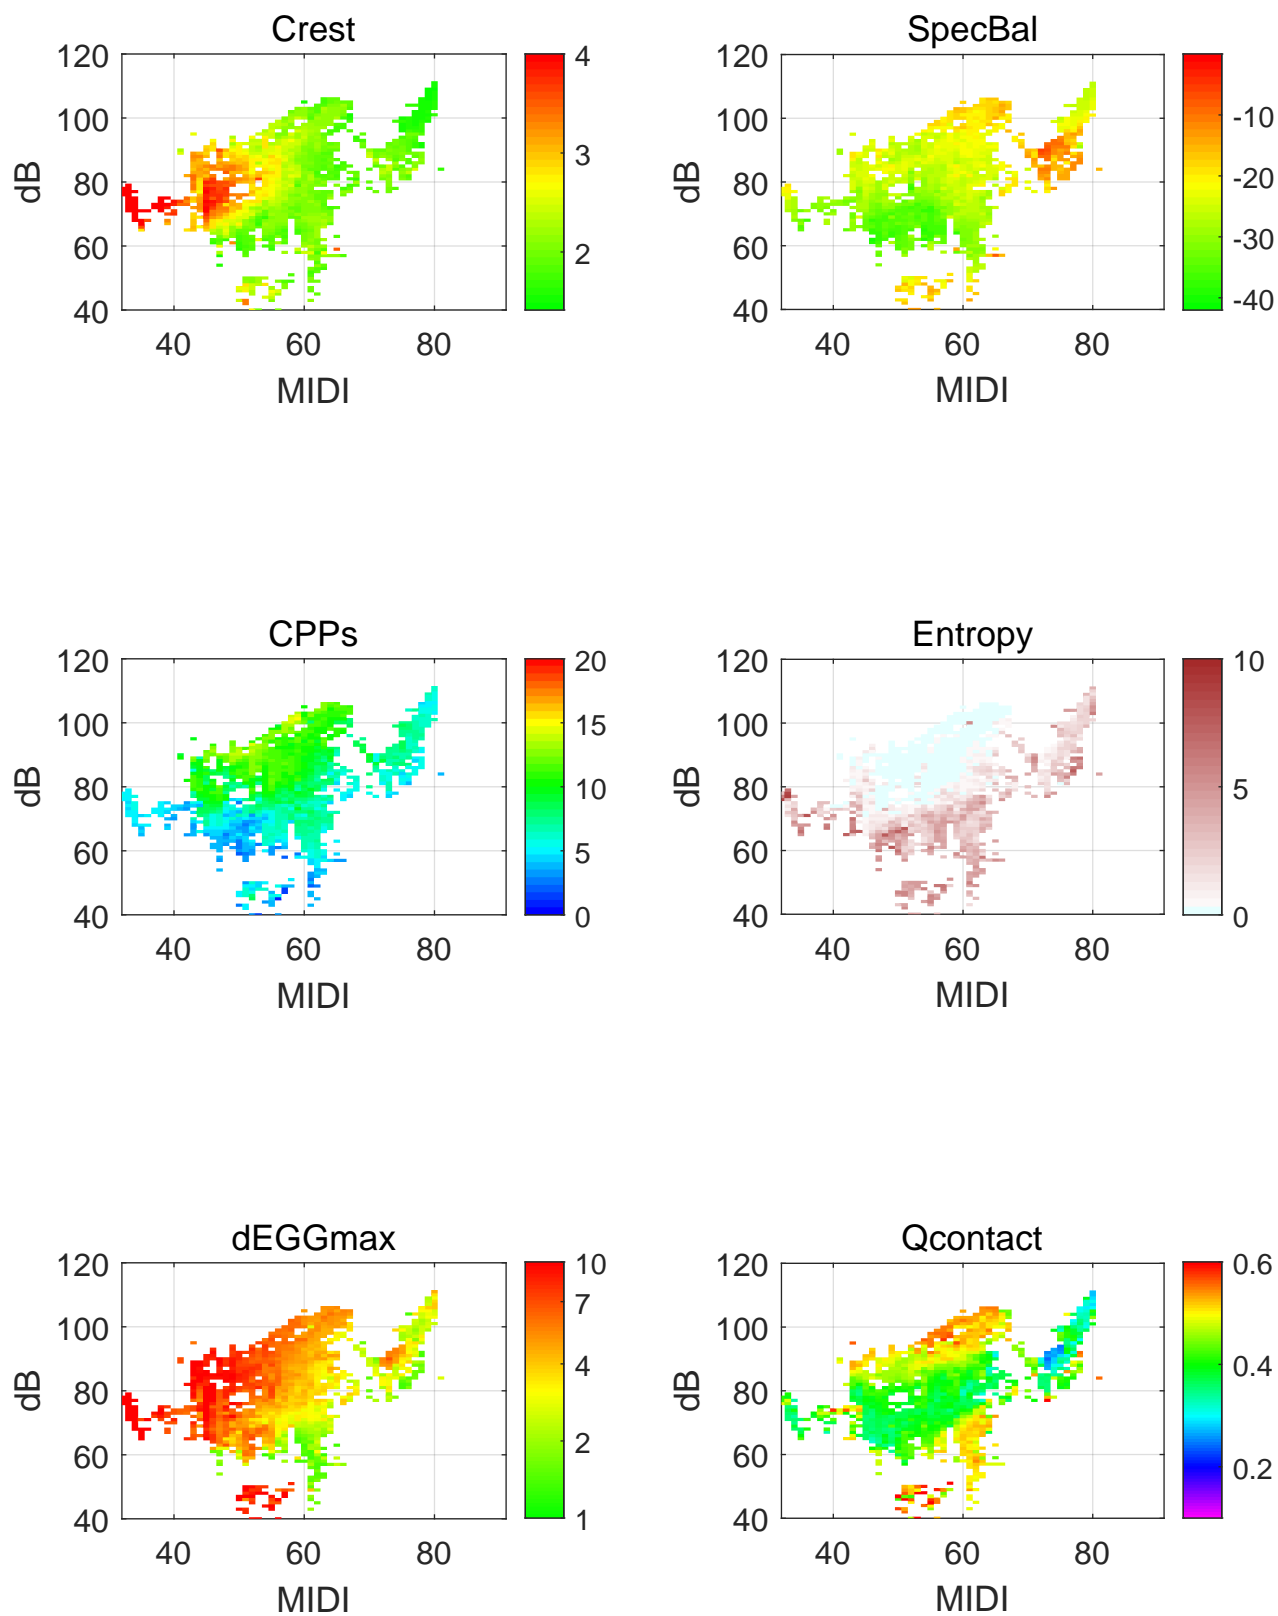

Figure S17: Classification voice maps for participant M09

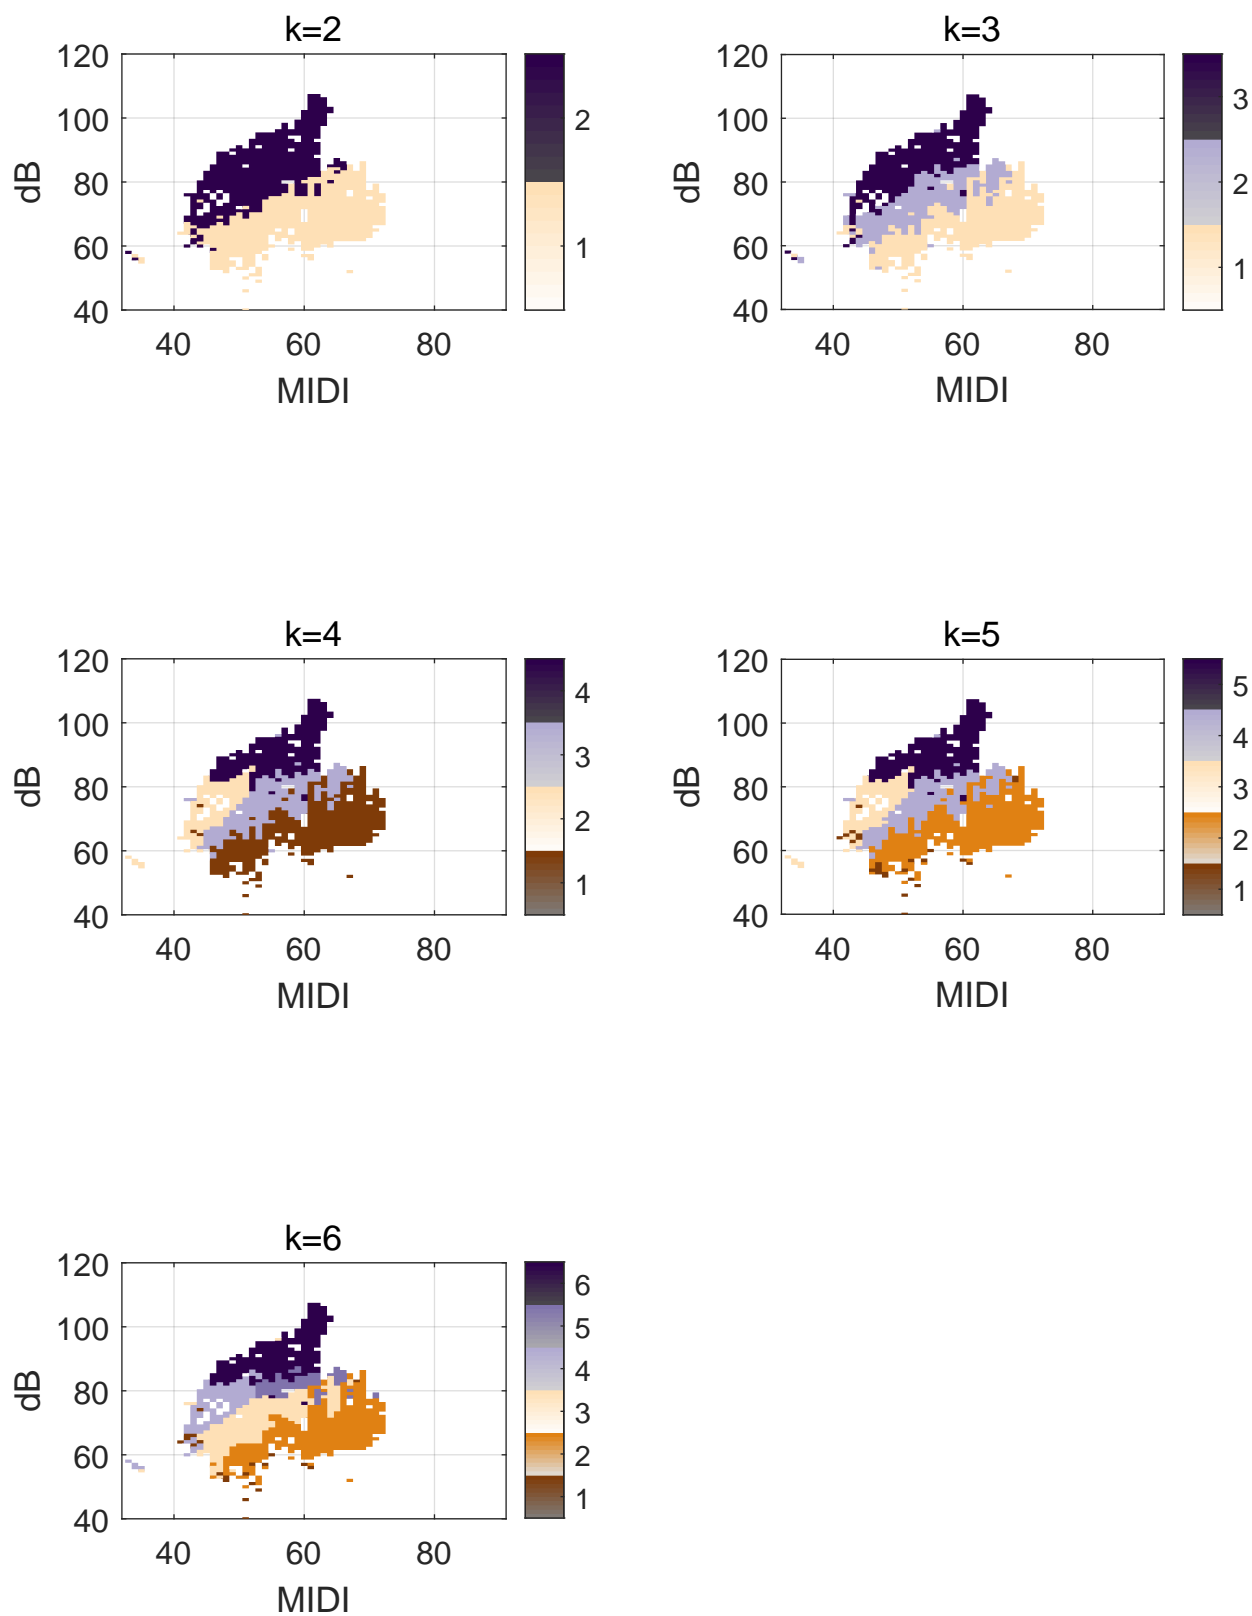

Figure S18: Acoustic and EGG Metric maps for participant M09

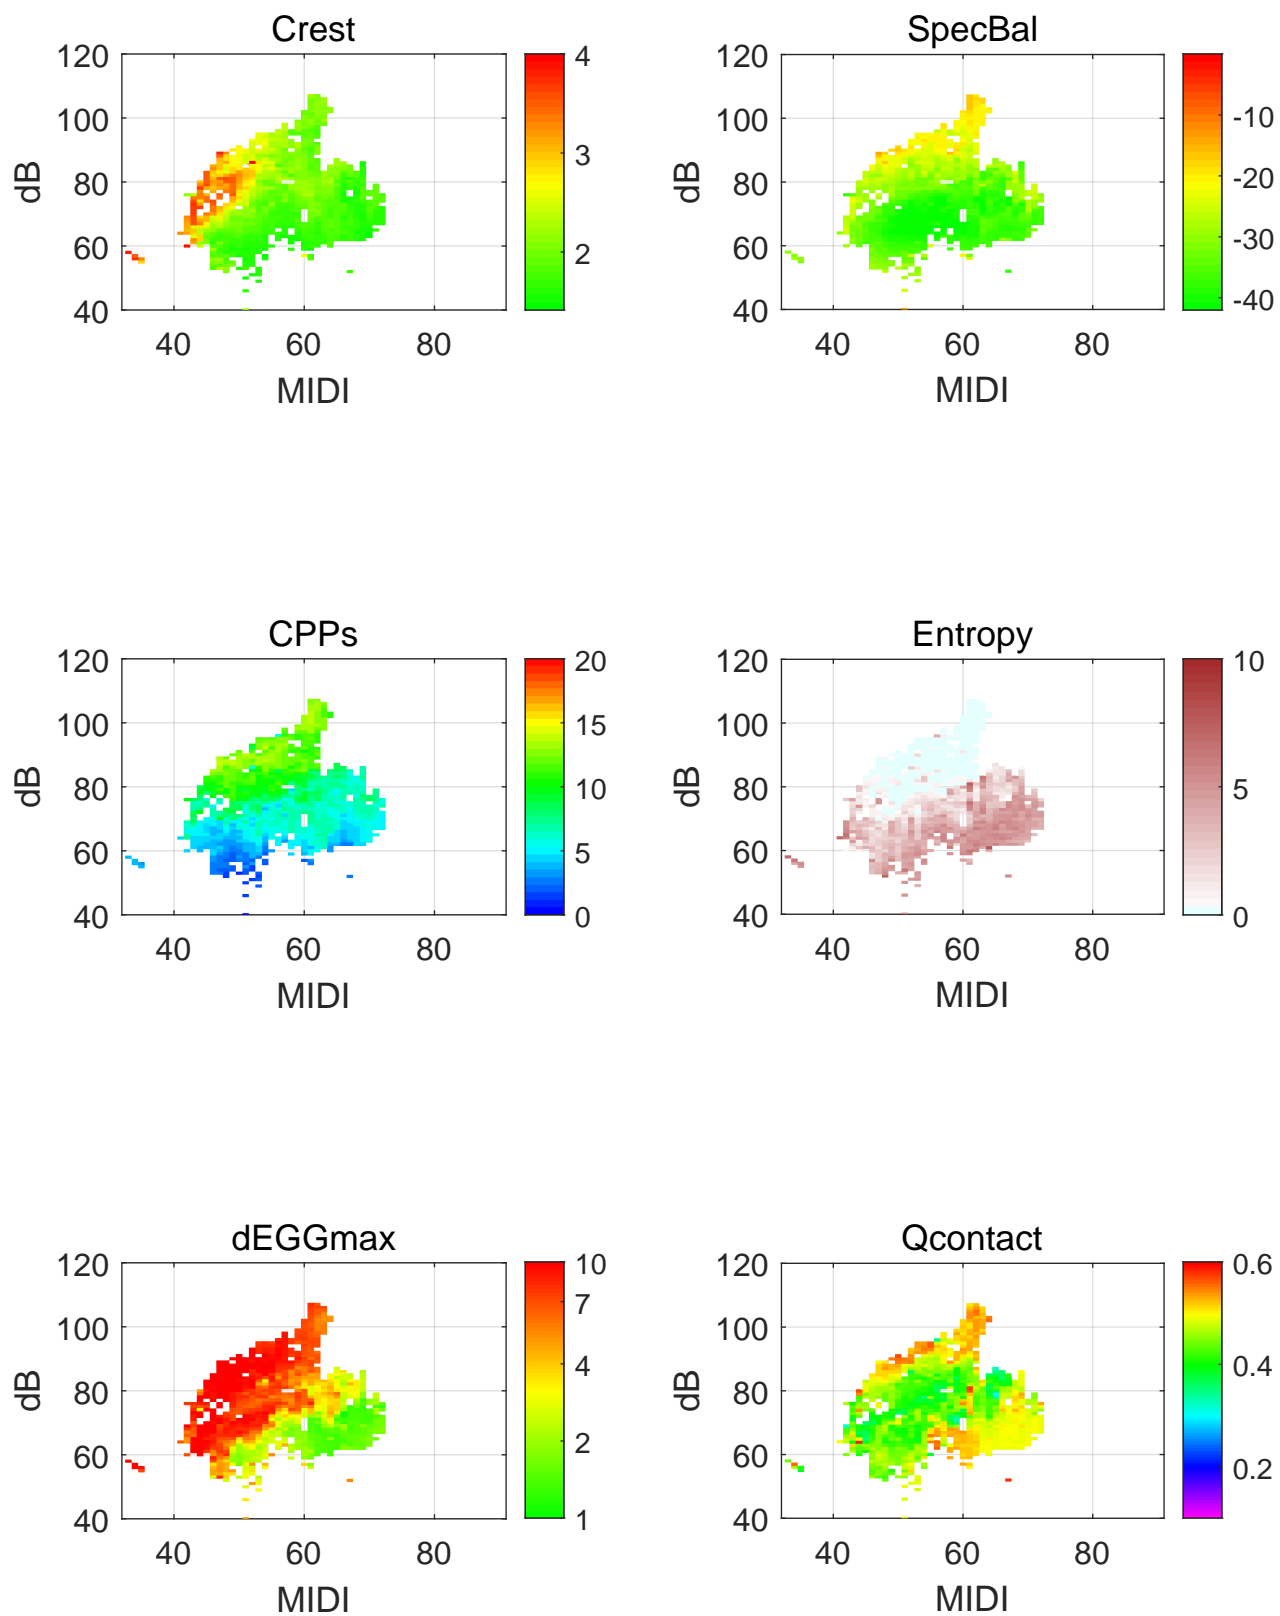

Figure S19: Classification voice maps for participant M10

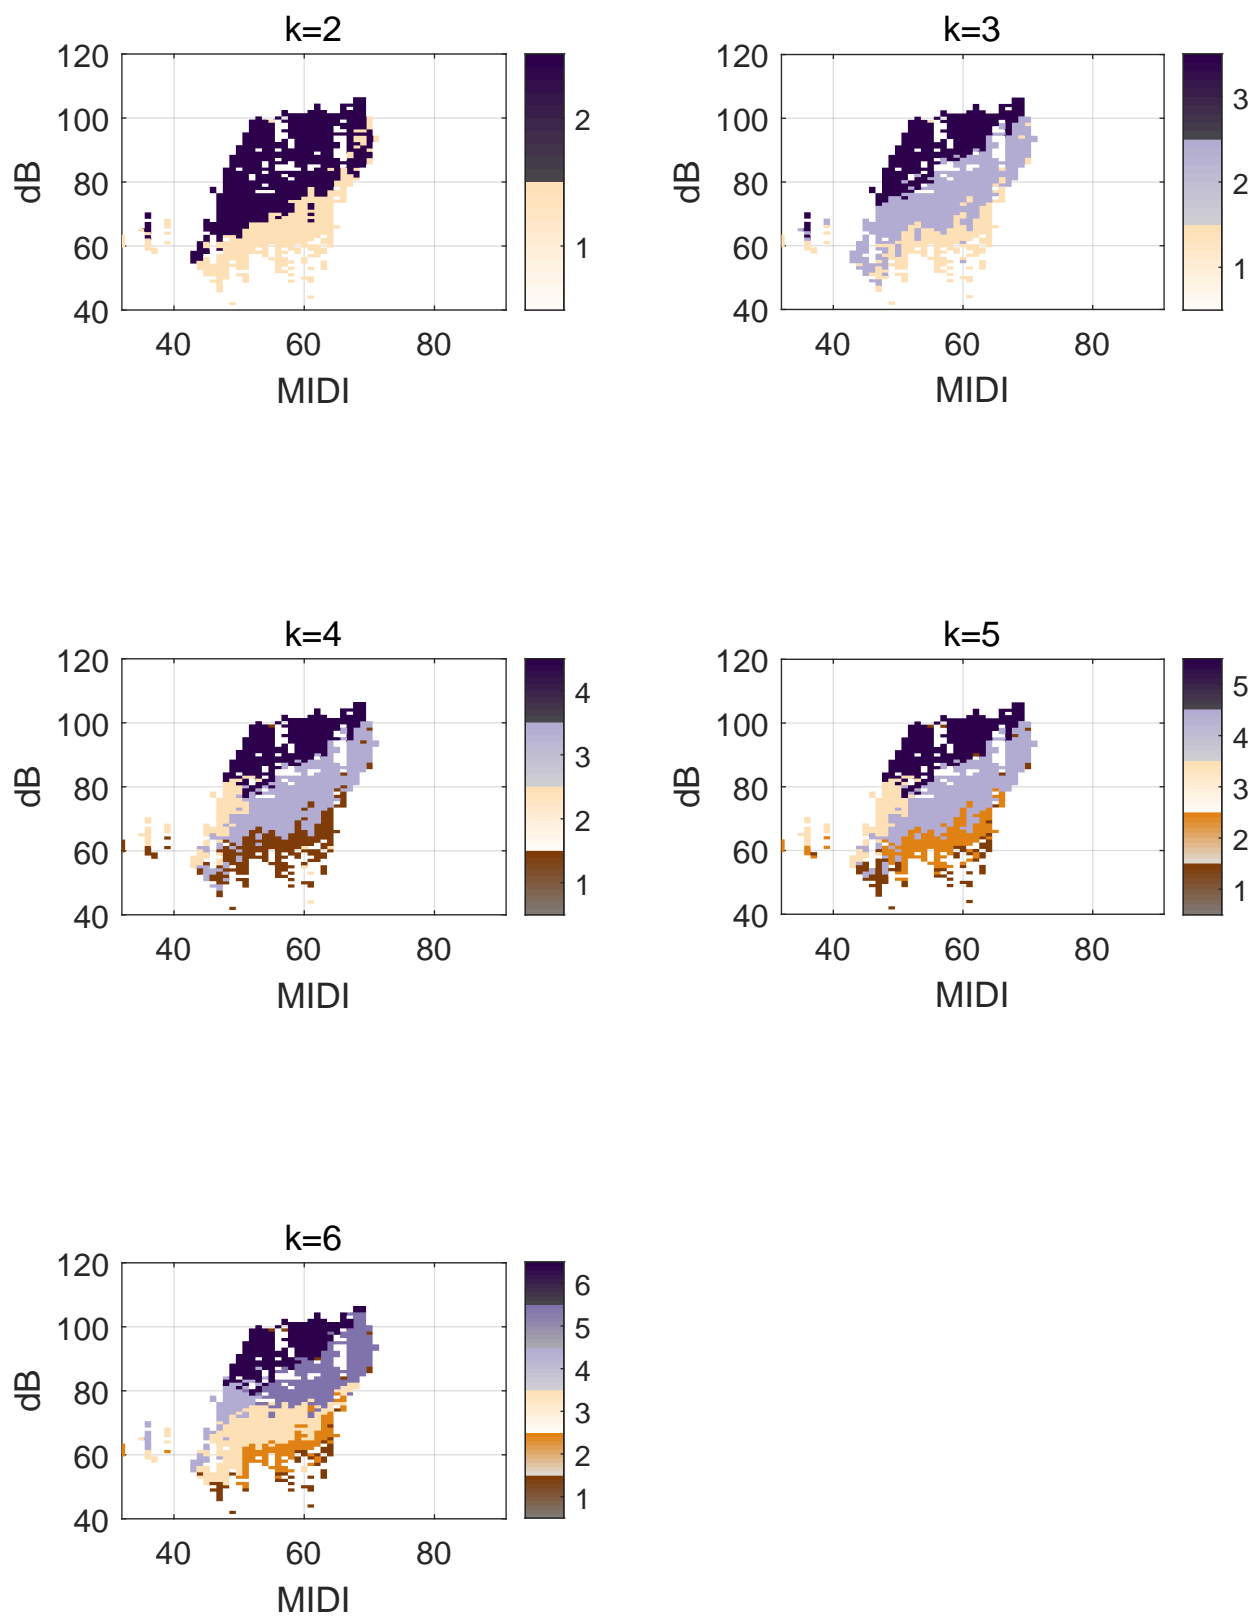



Figure S20: Acoustic and EGG Metric maps for participant M10

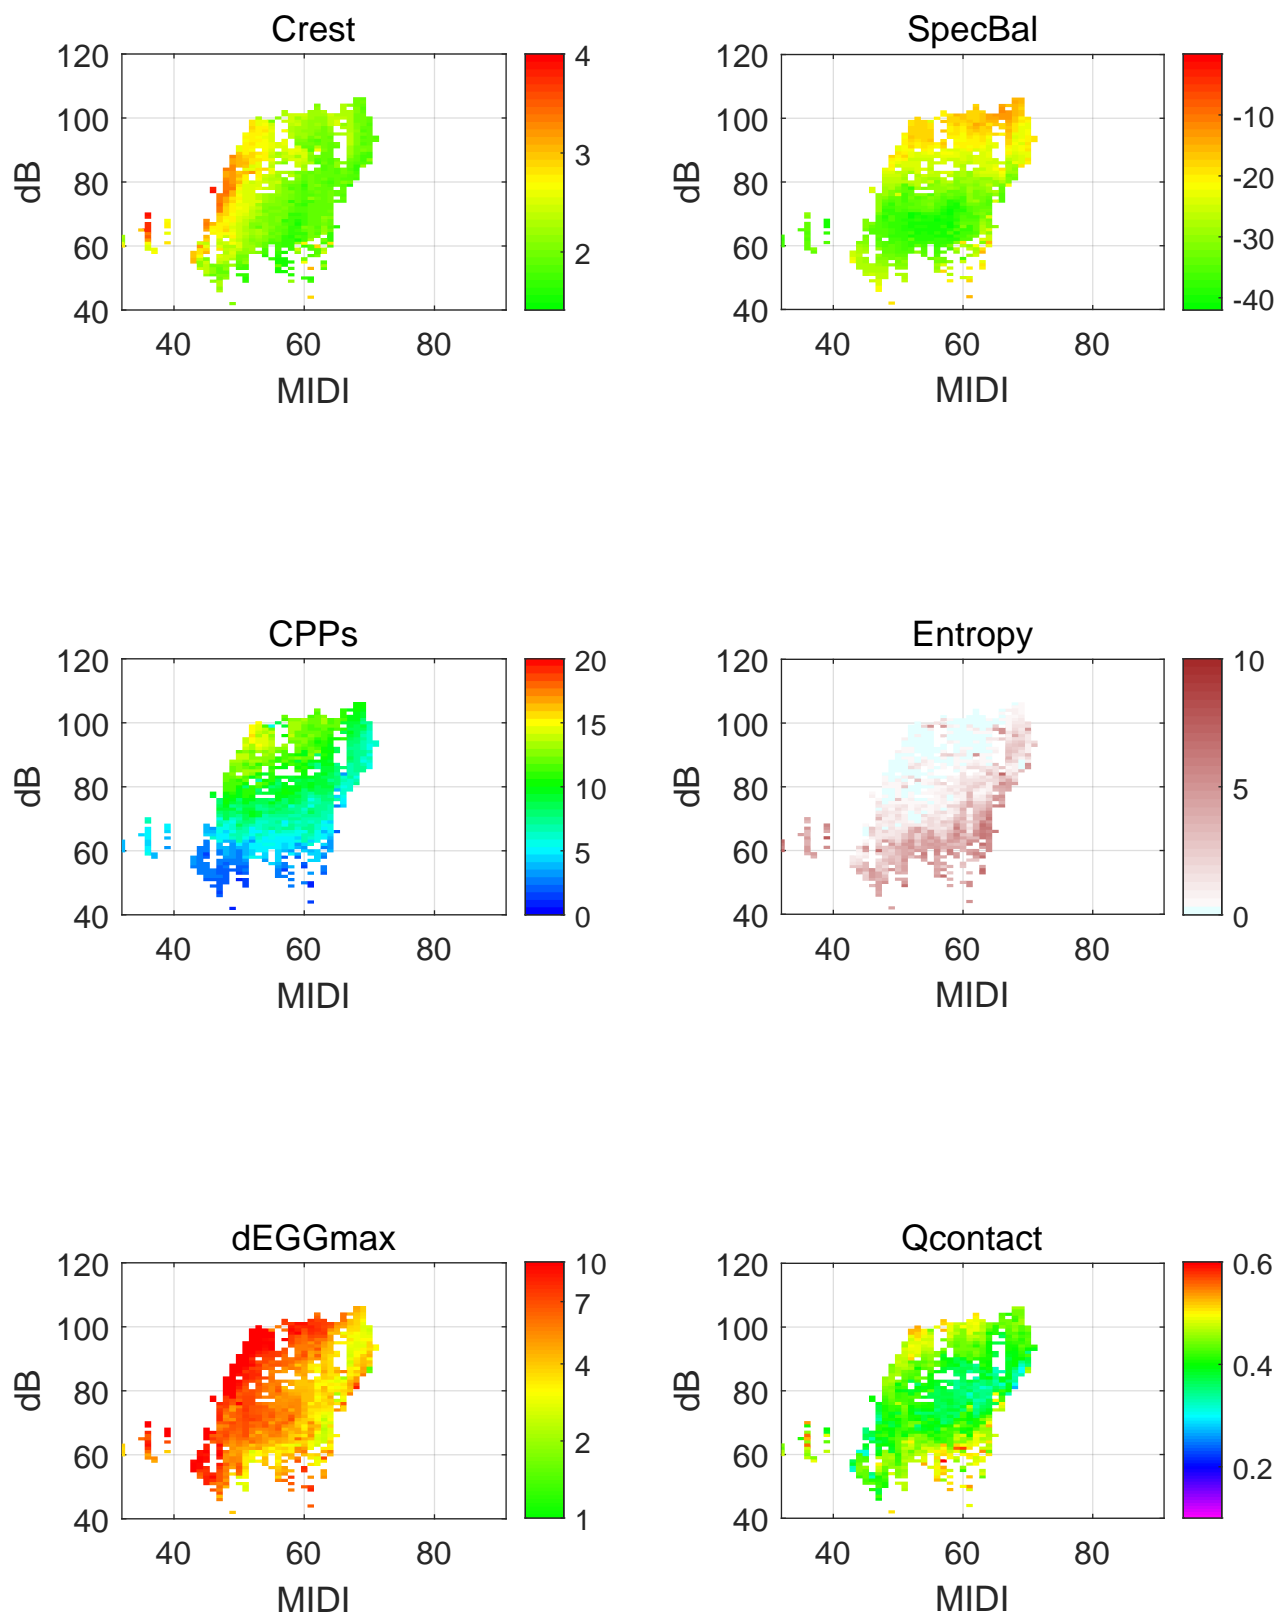

Figure S21: Classification voice maps for participant M11

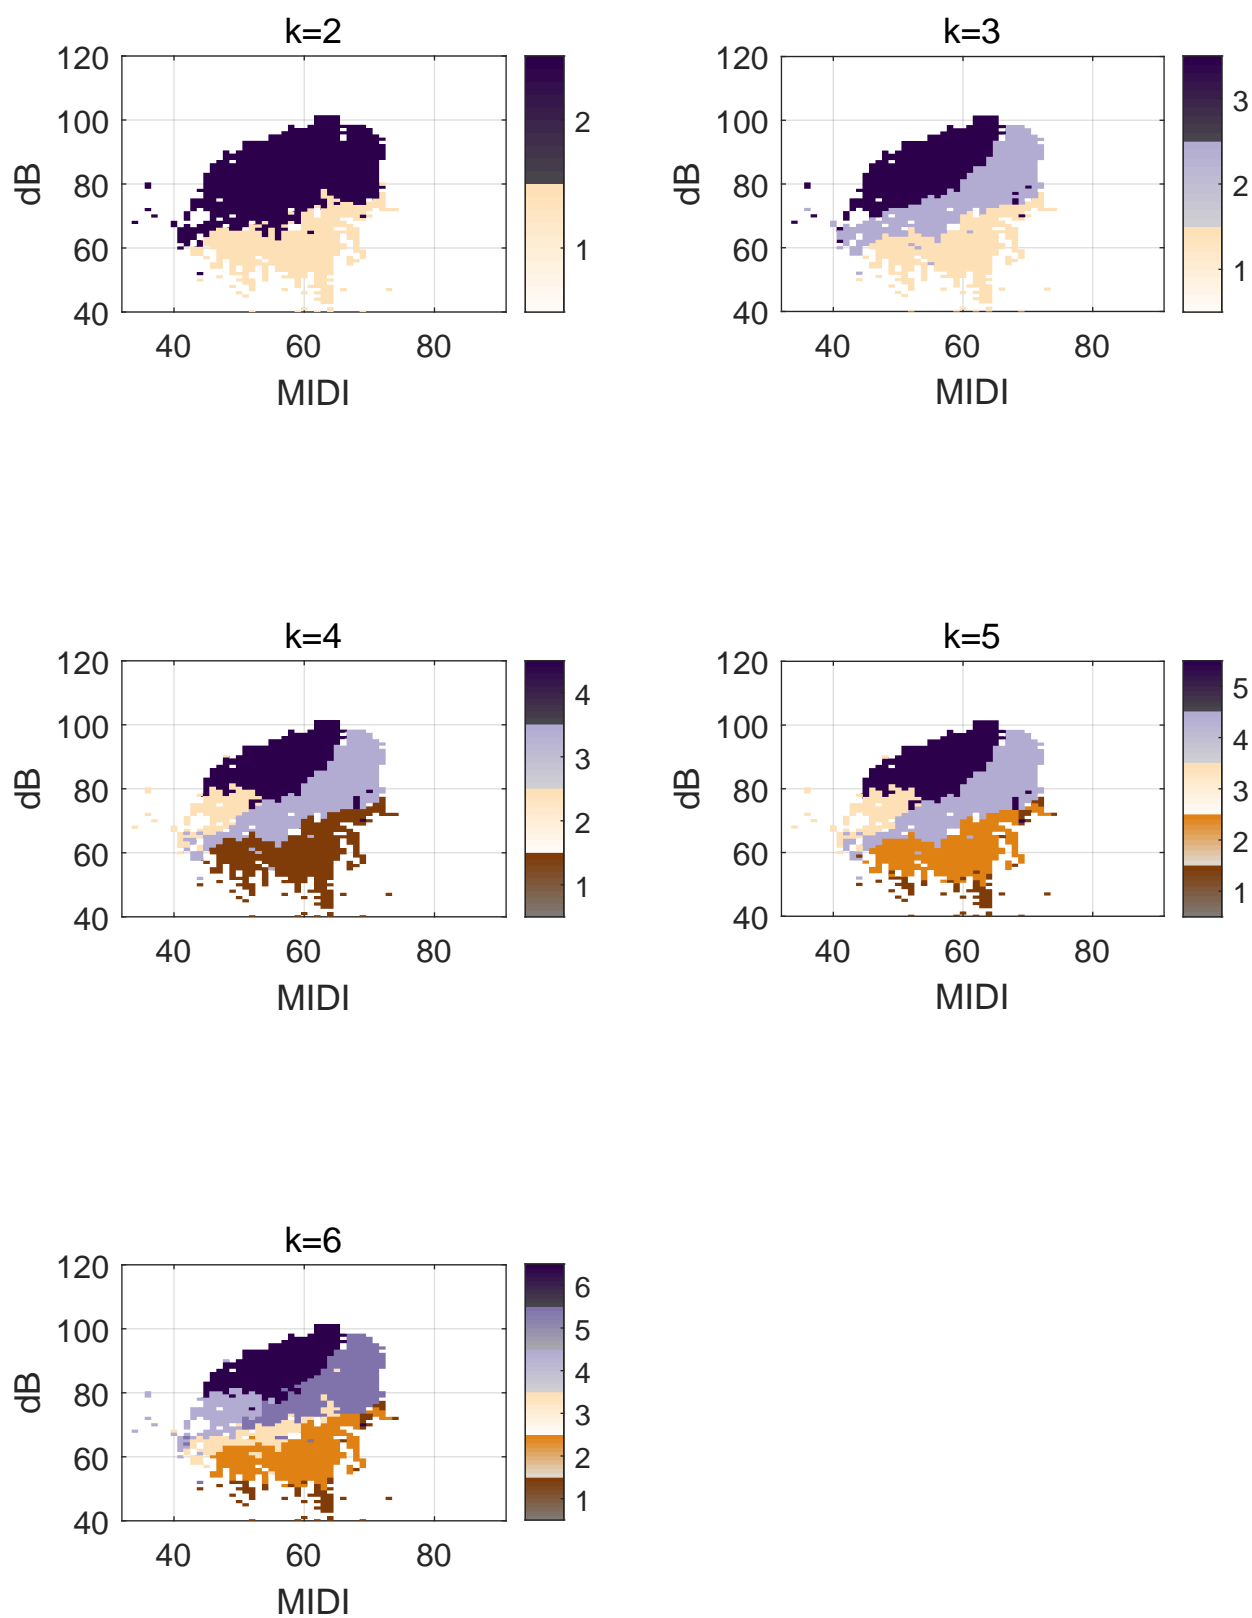

Figure S22: Acoustic and EGG Metric maps for participant M11

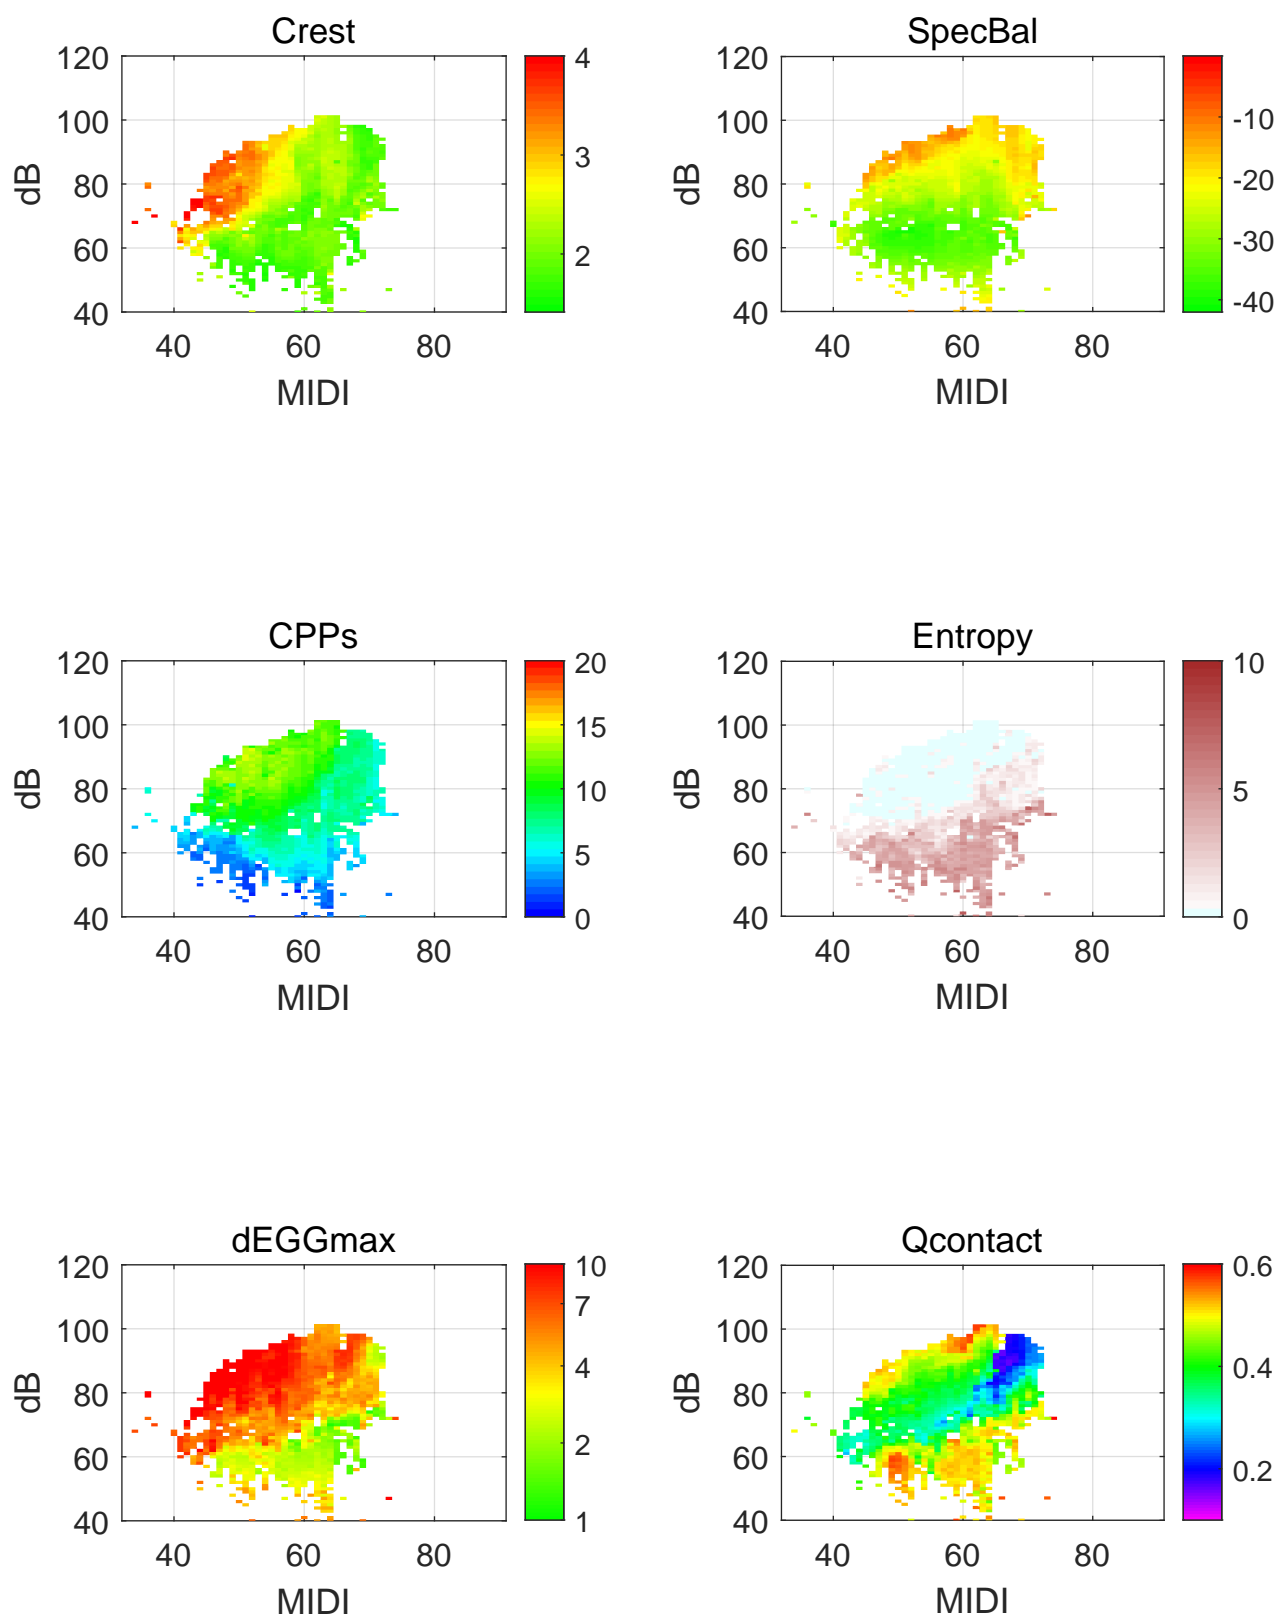

Figure S23: Classification voice maps for participant M12

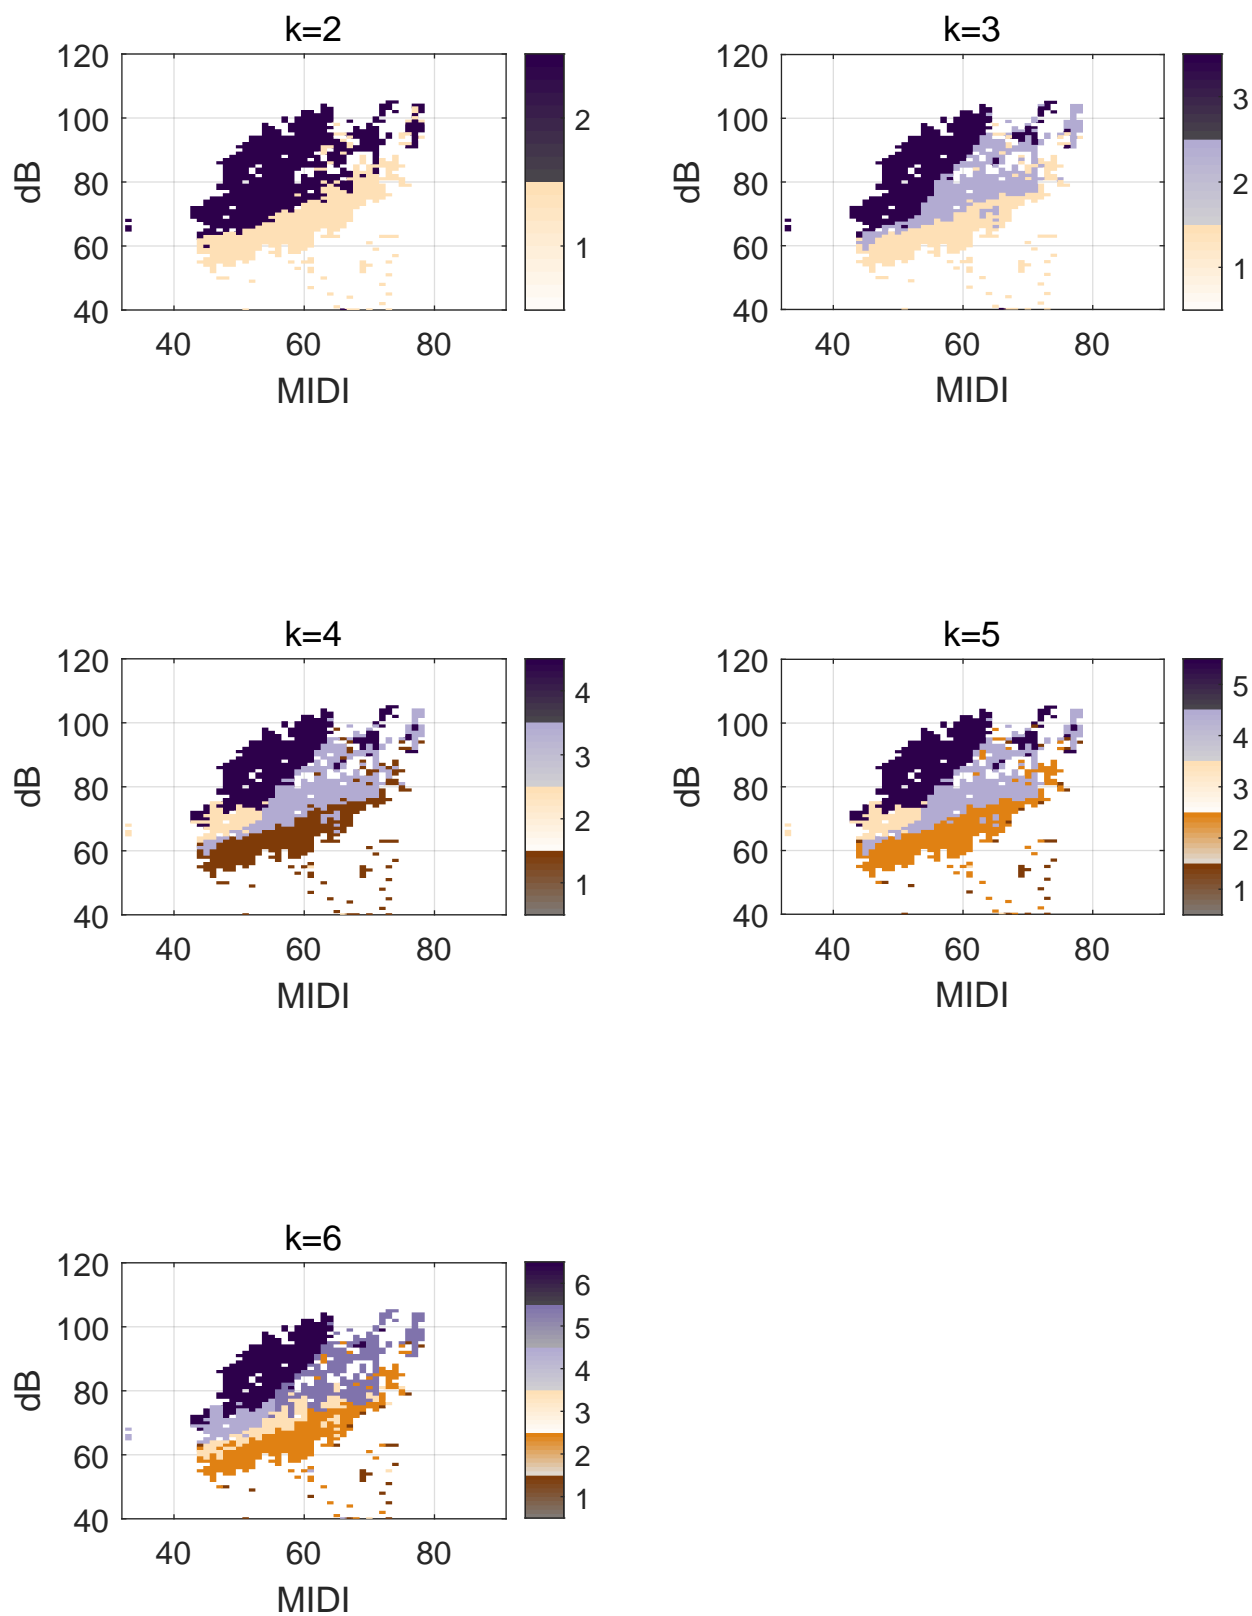

Figure S24: Acoustic and EGG Metric maps for participant M12

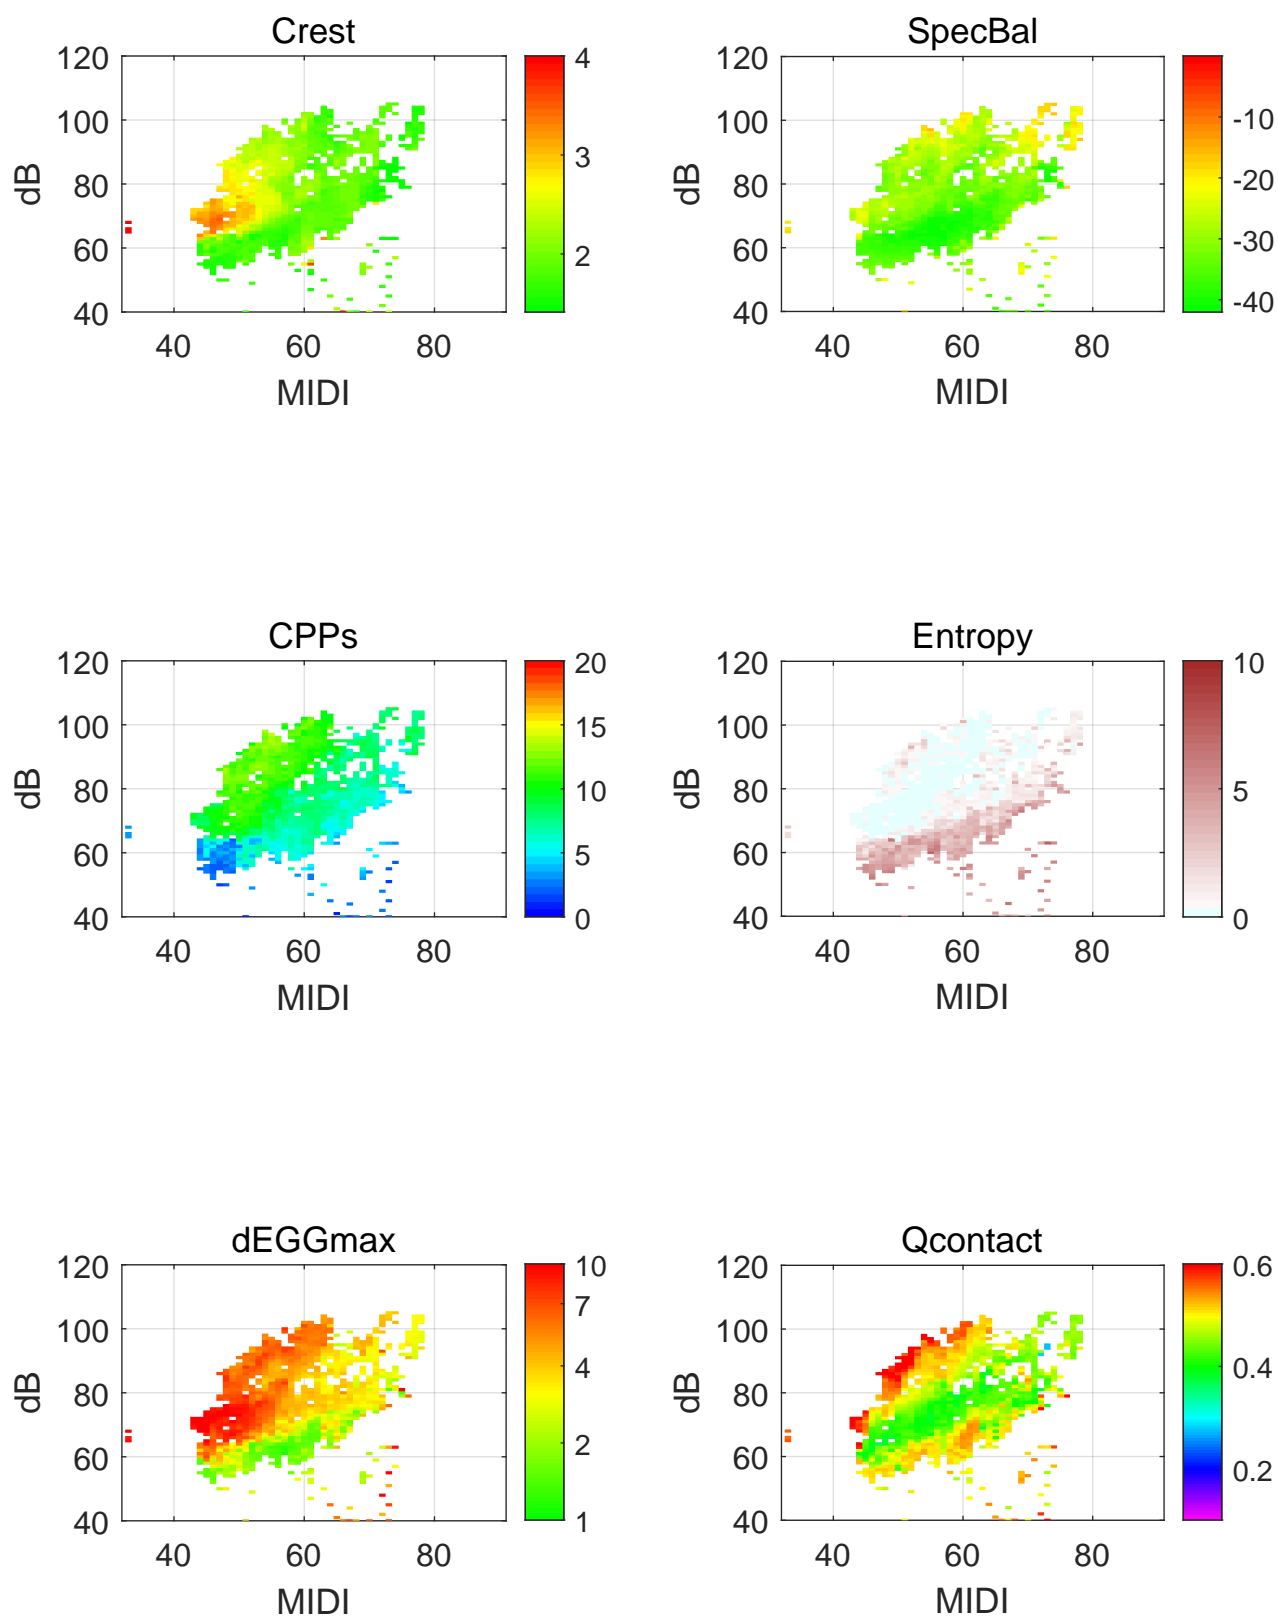

Figure S25: Classification voice maps for participant M13

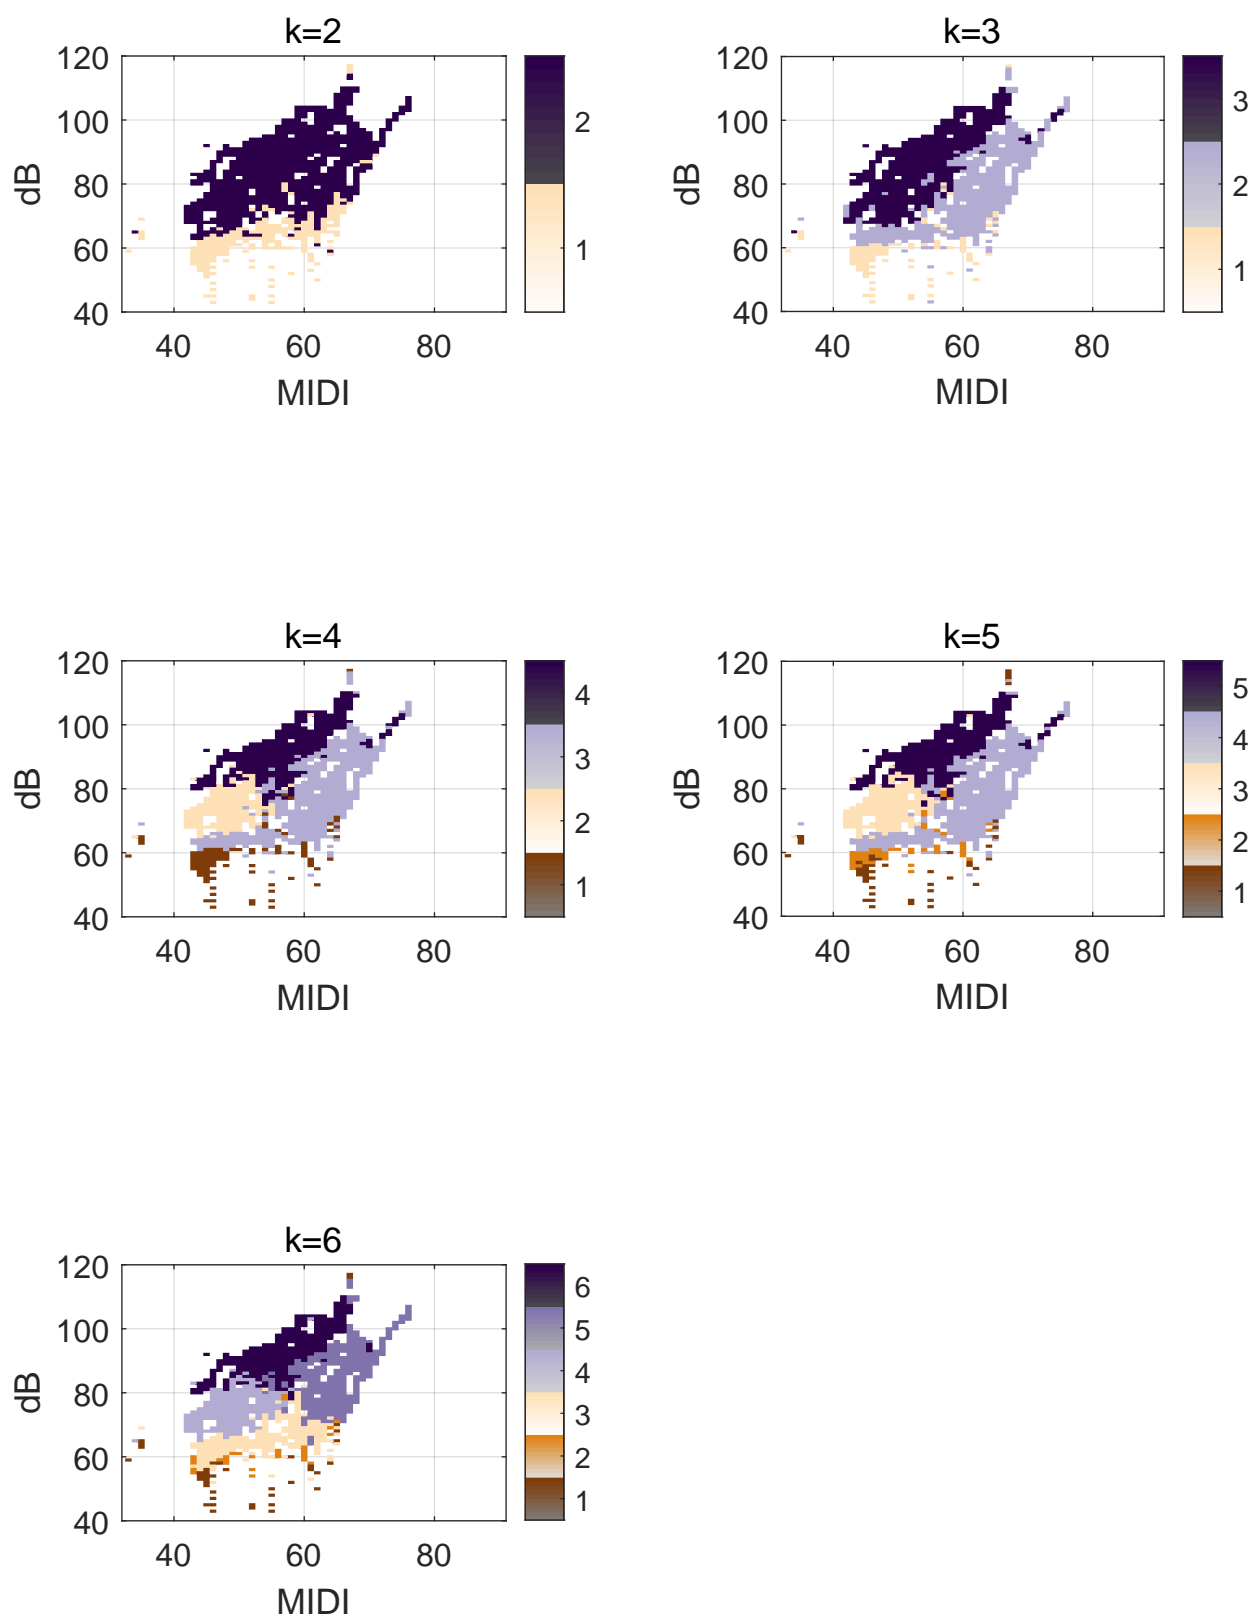

Figure S26: Acoustic and EGG Metric maps for participant M13

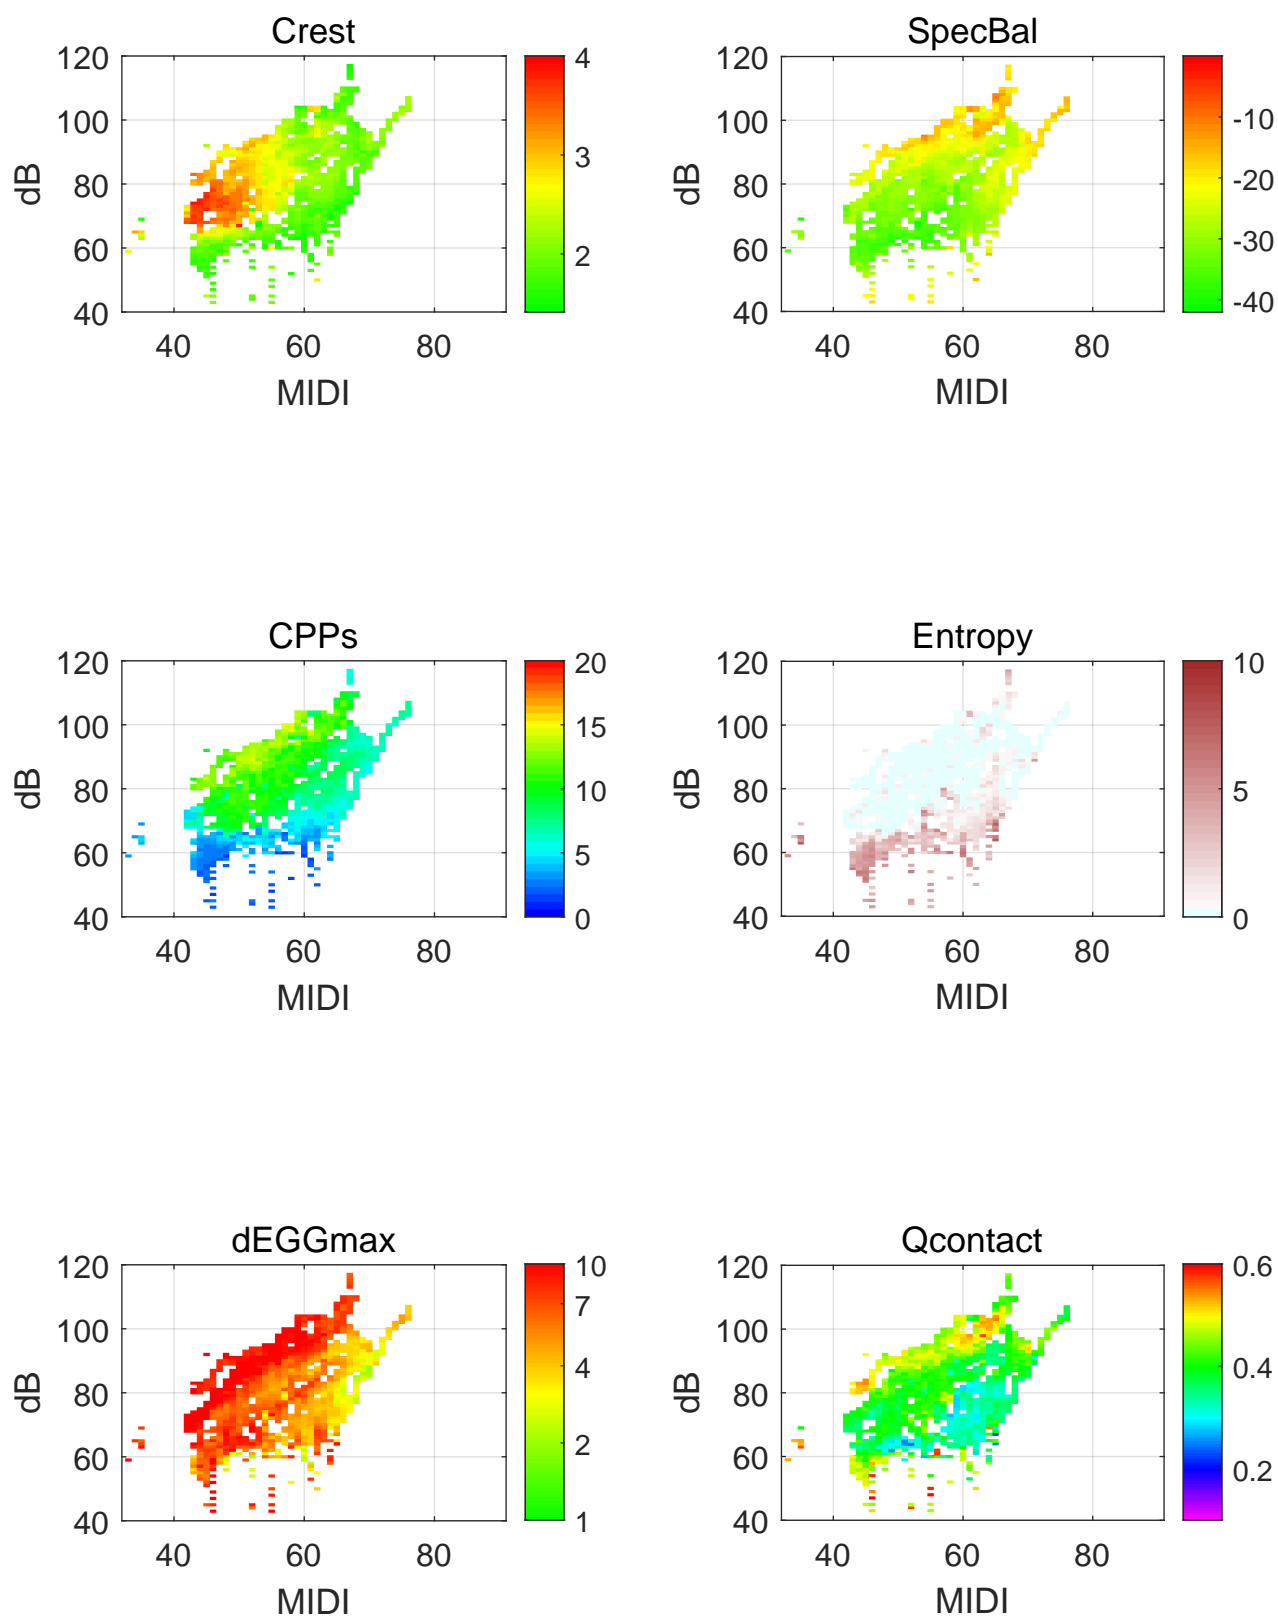

Figure S27: Centroid polar in percentage for Males group

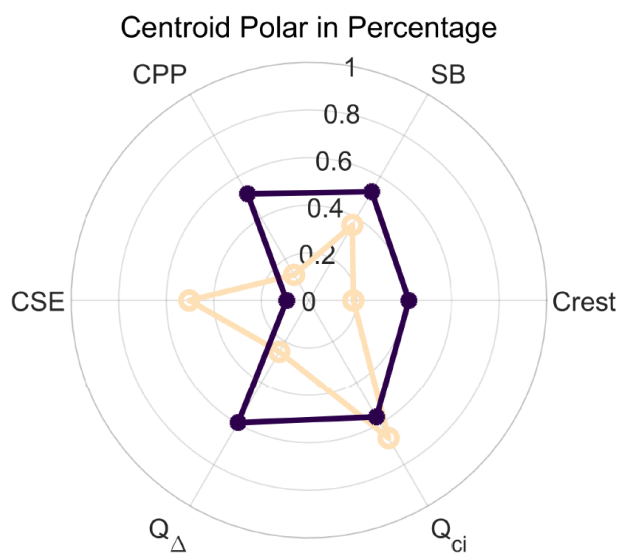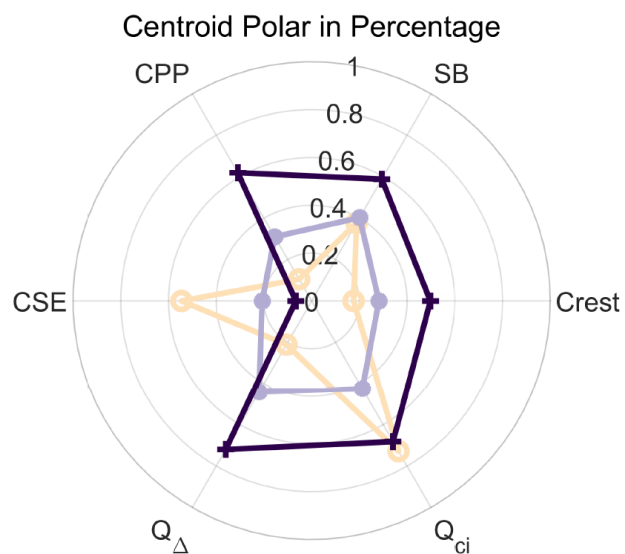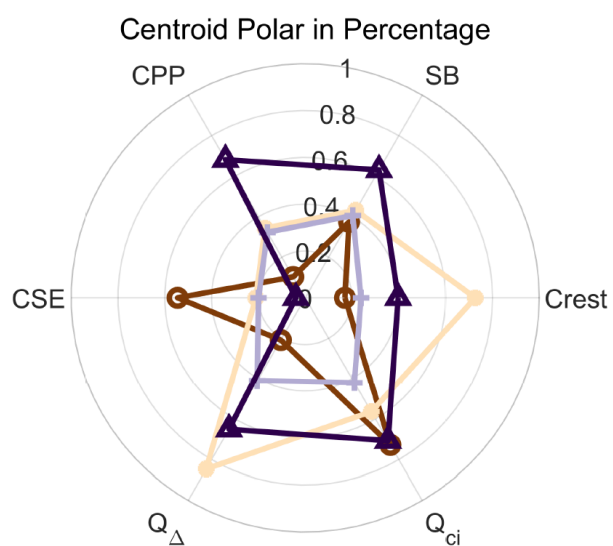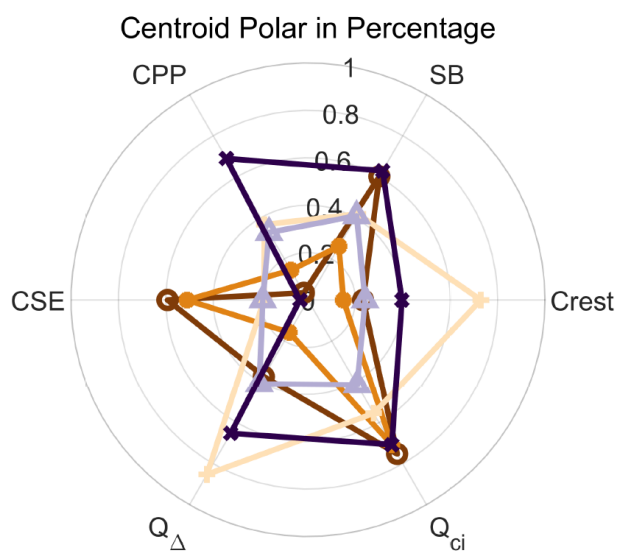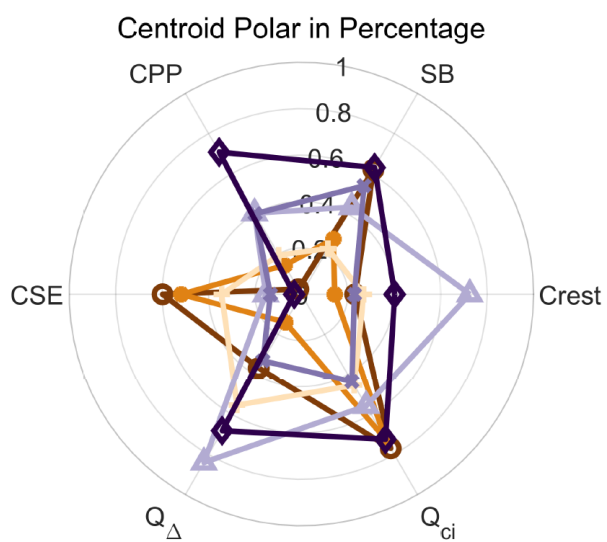



Figure S28: Classification voice maps for participant F01

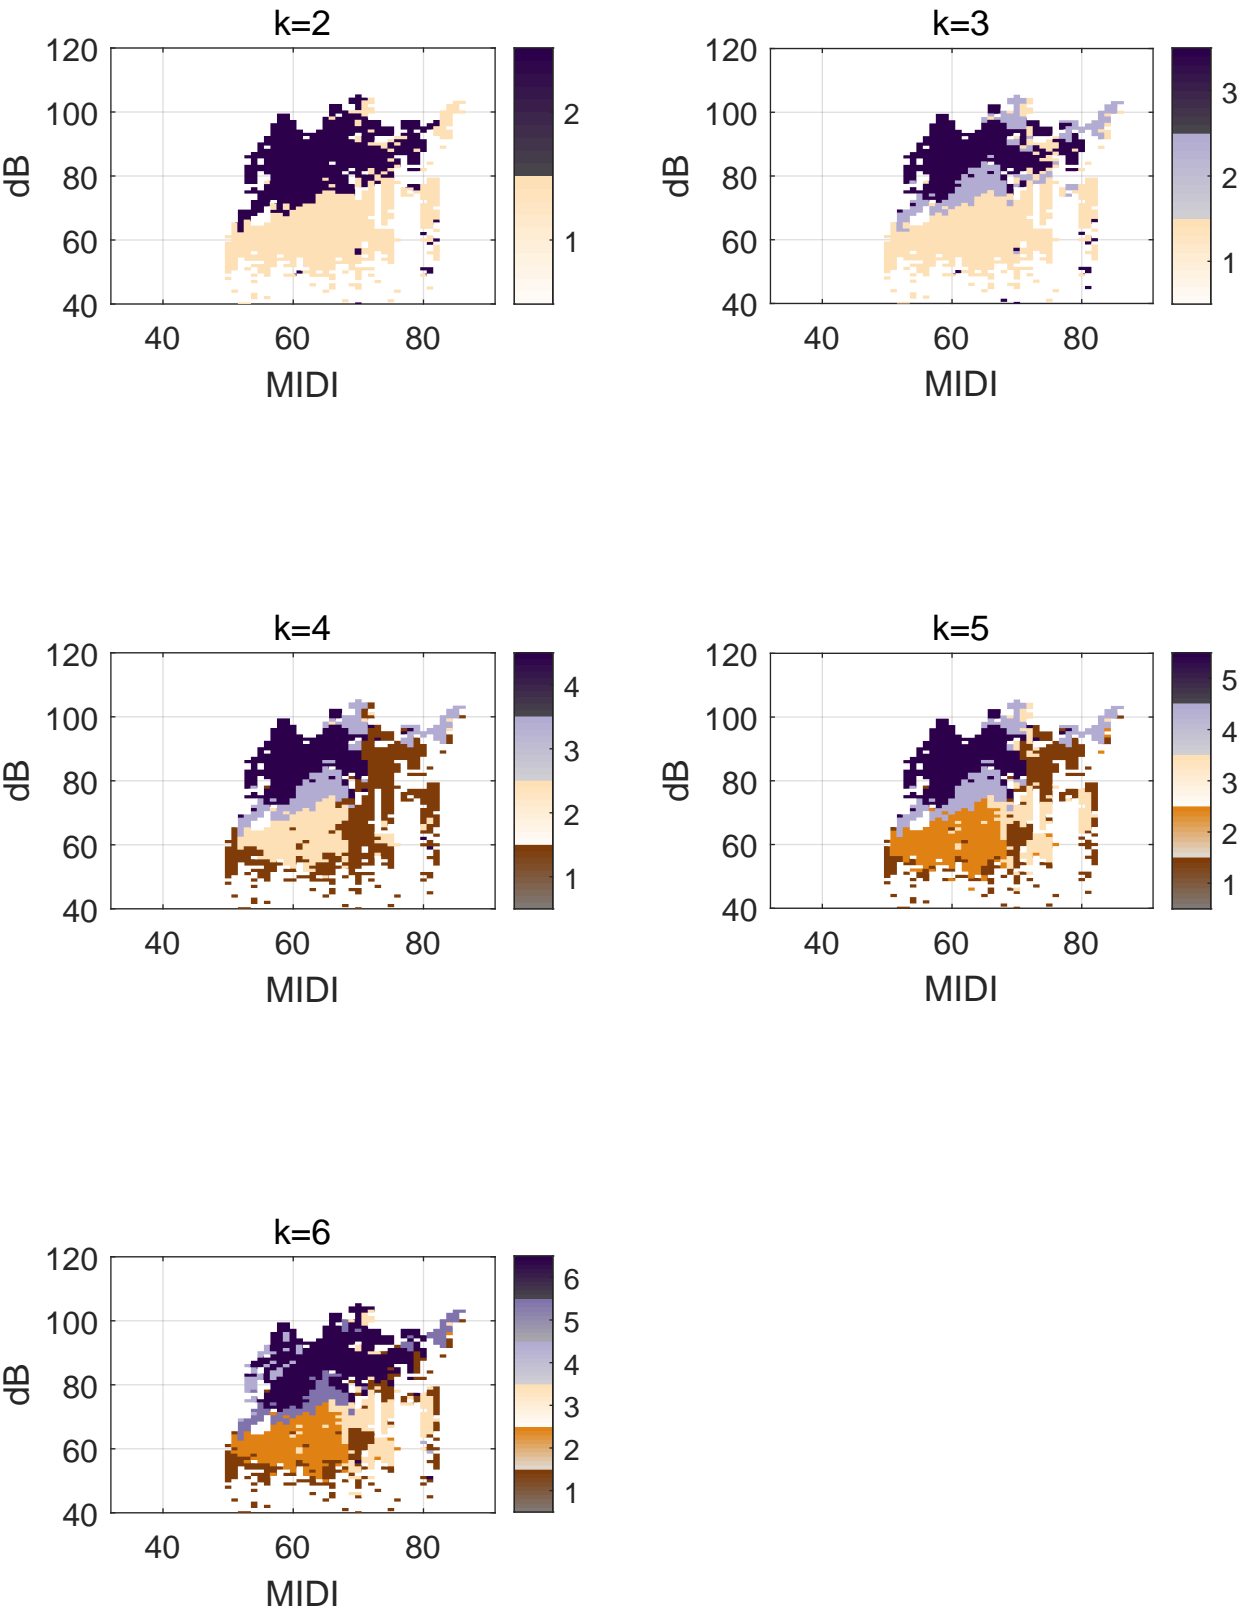

Figure S29: Acoustic and EGG Metric maps for participant F01

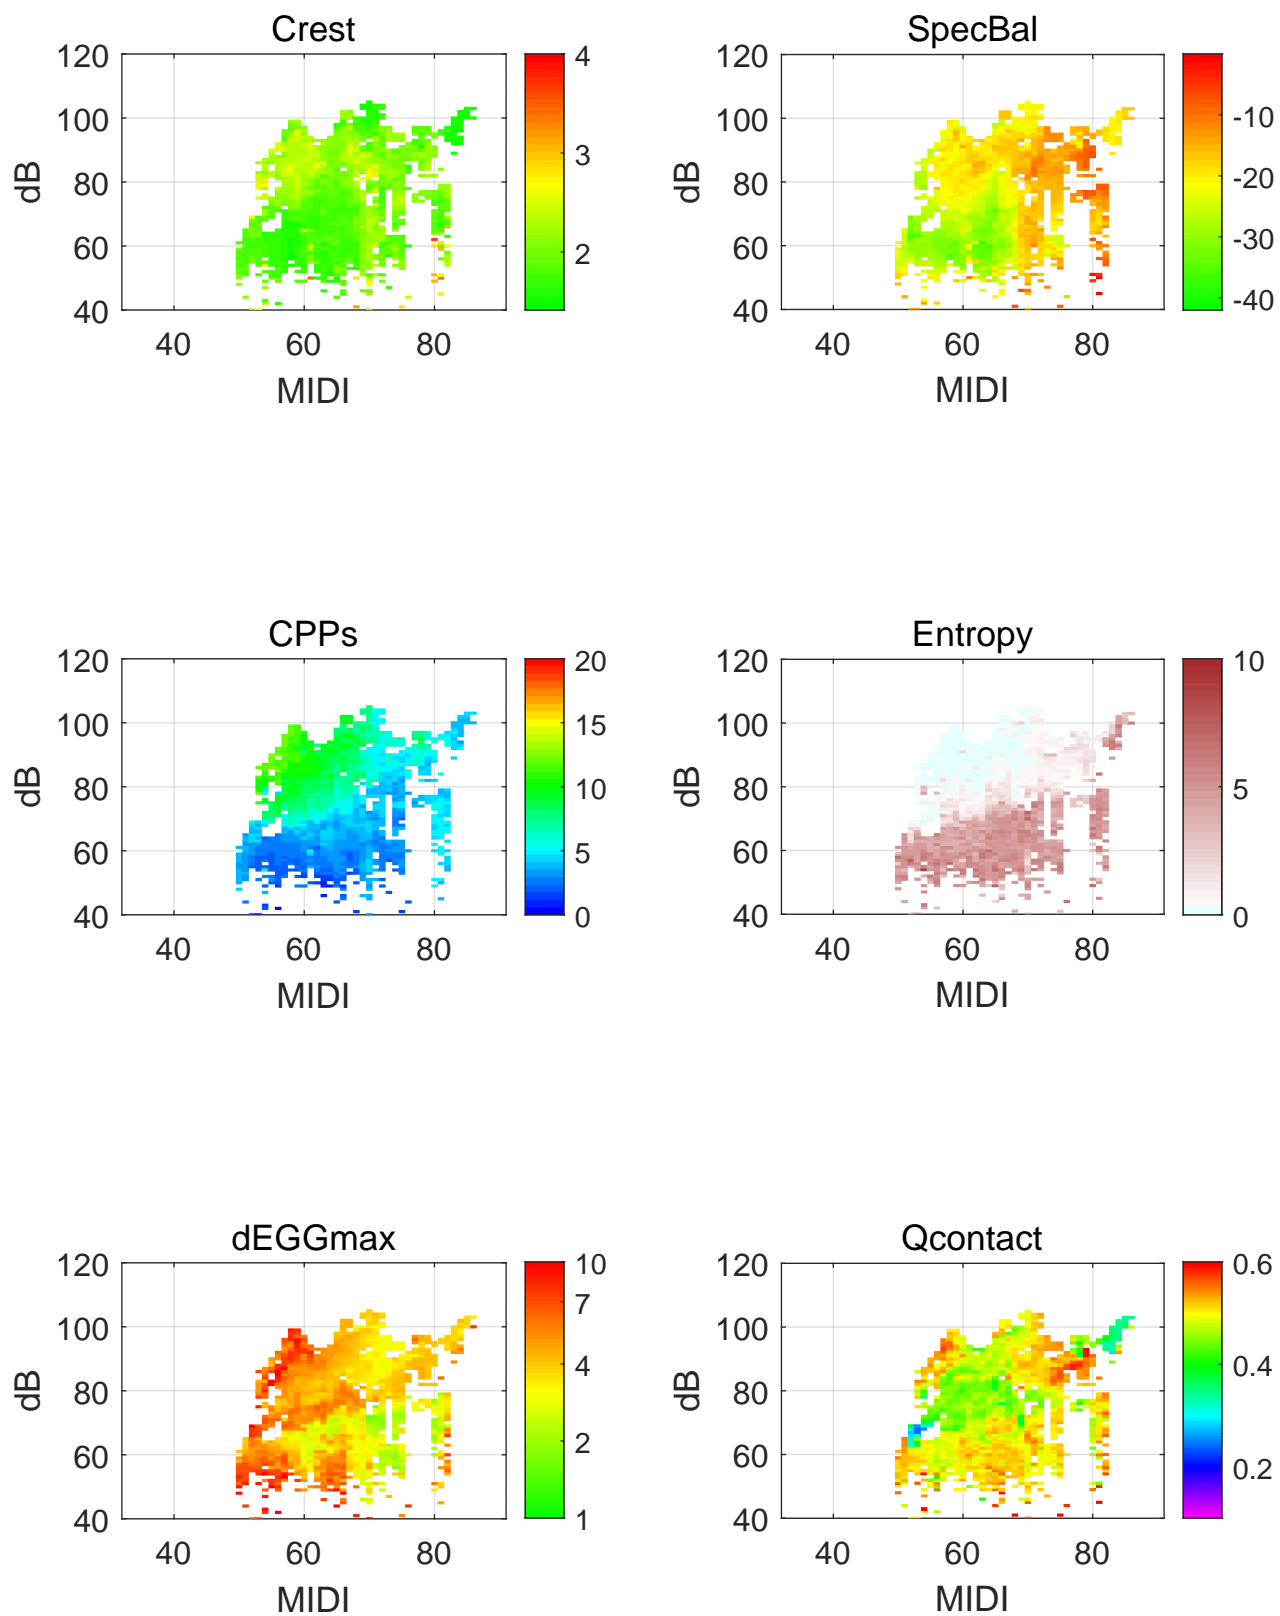

Figure S30: Classification voice maps for participant F02

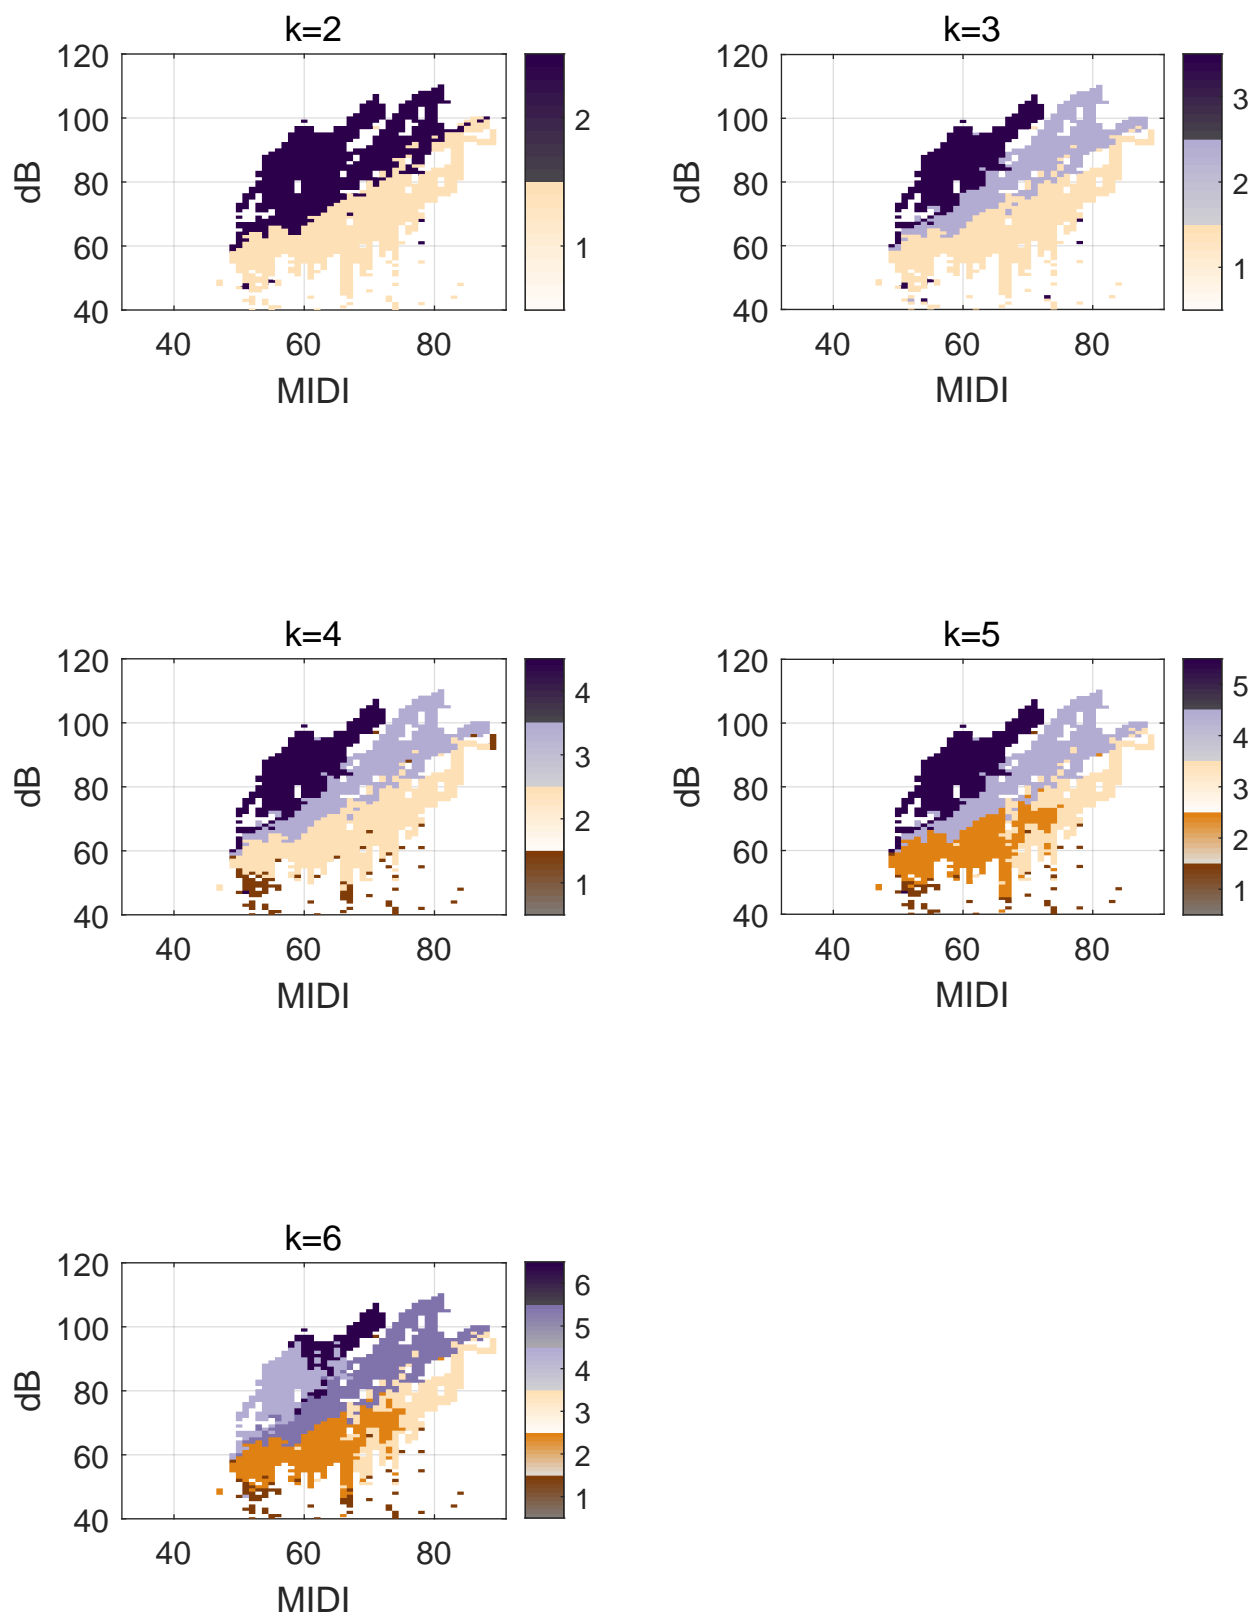

Figure S31: Acoustic and EGG Metric maps for participant F02

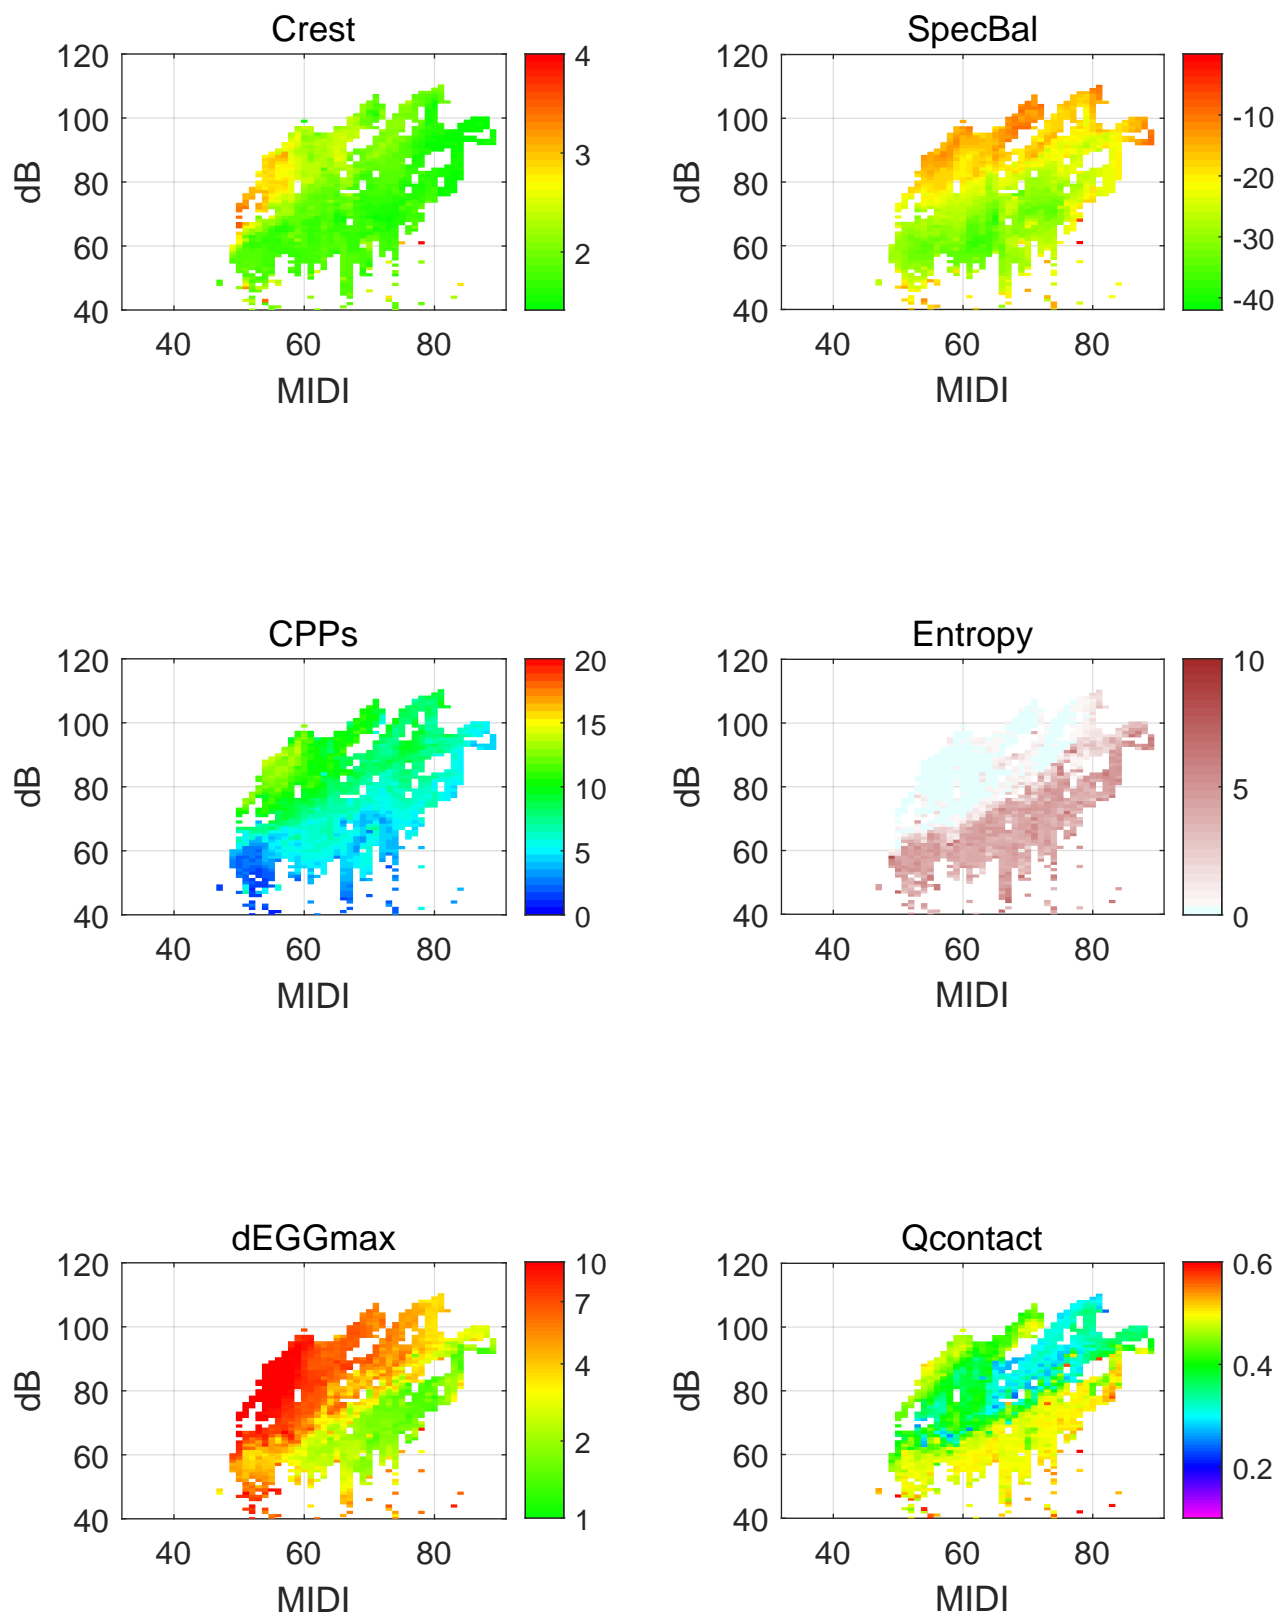

Figure S32: Classification voice maps for participant F03

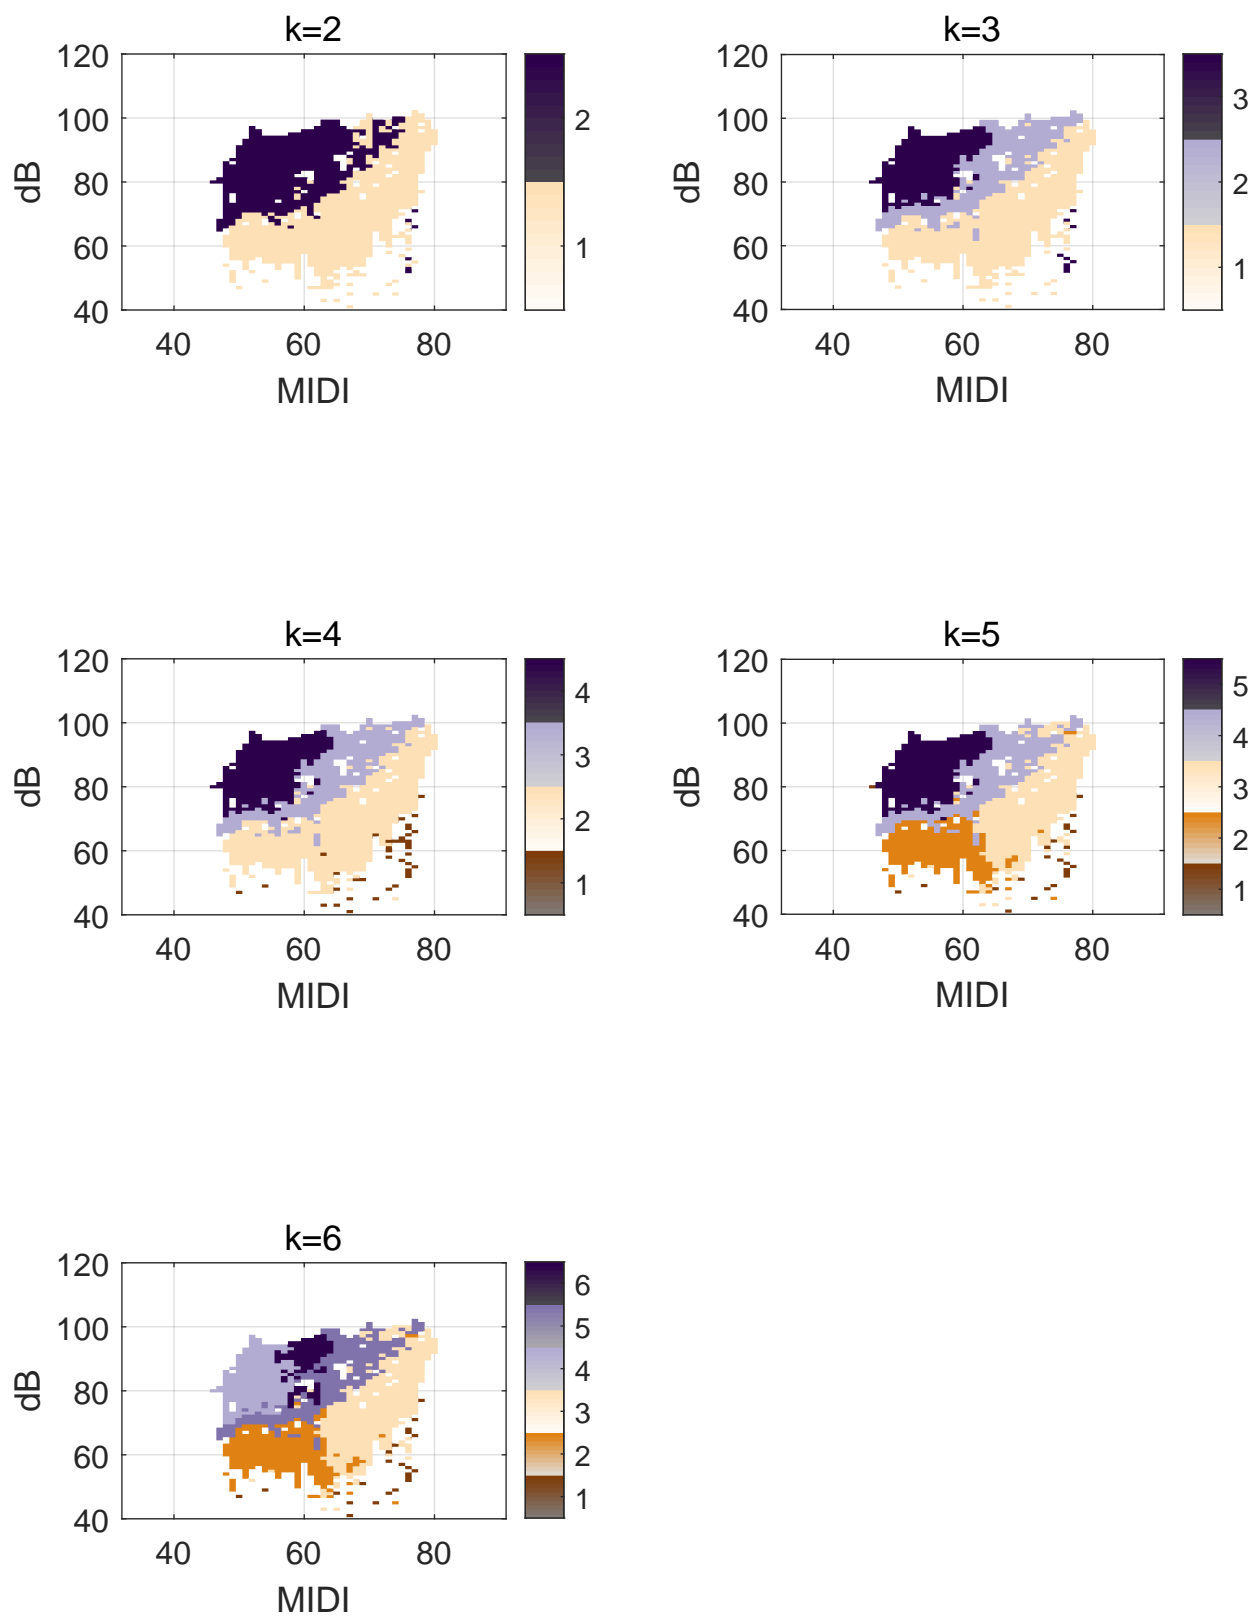

Figure S33: Acoustic and EGG Metric maps for participant F03

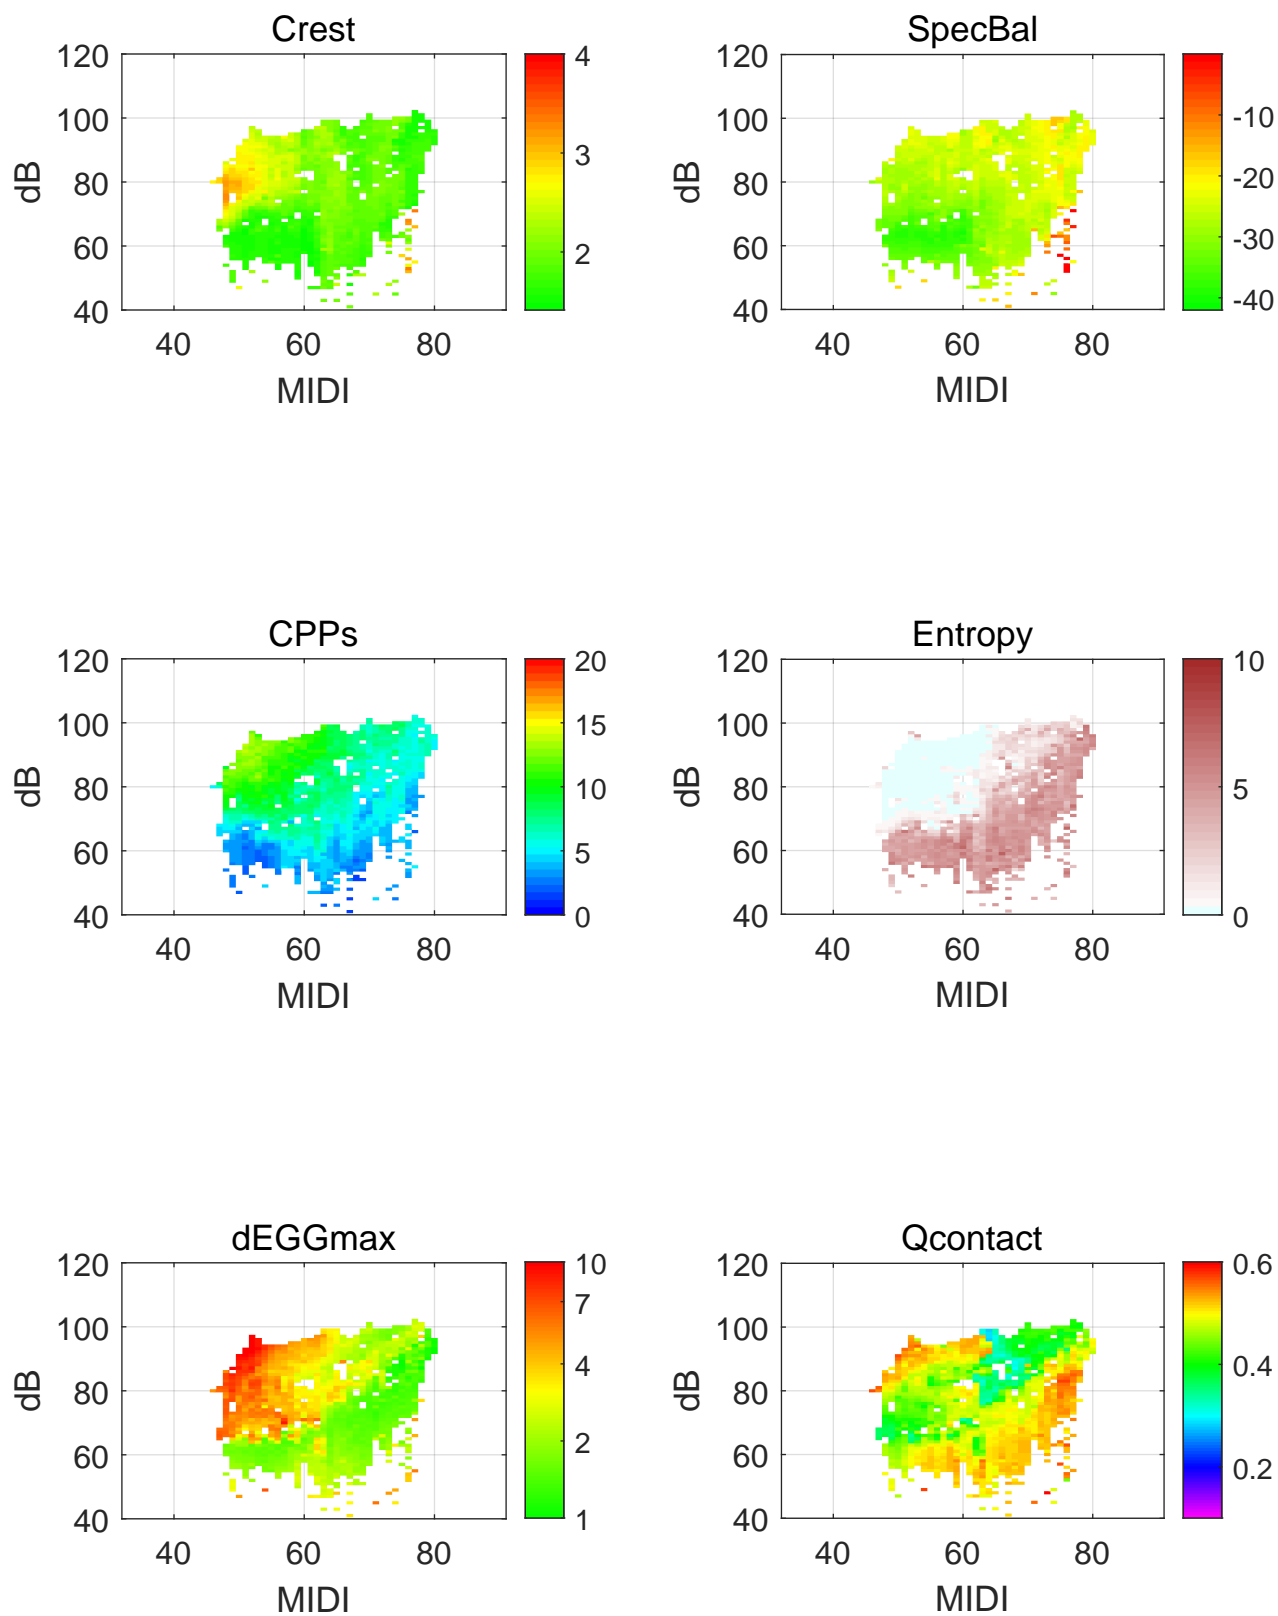

Figure S34: Classification voice maps for participant F05

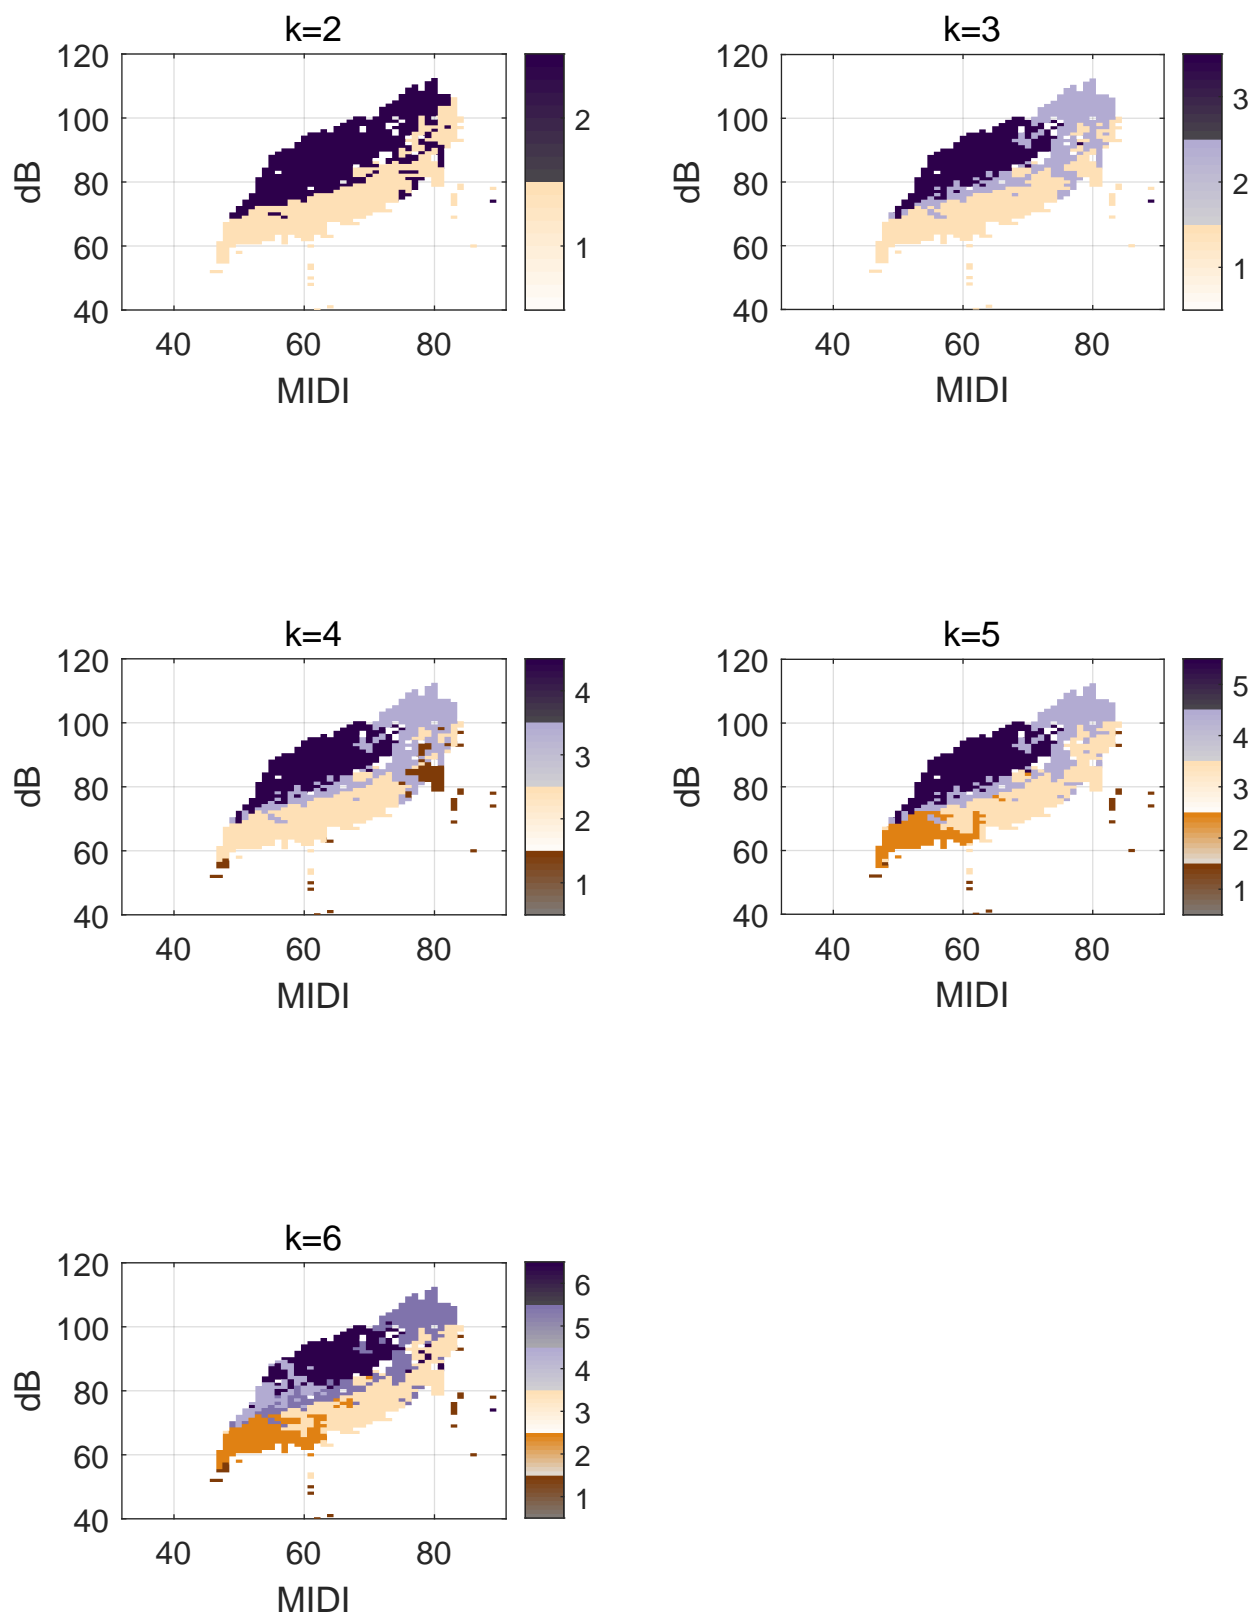

Figure S35: Acoustic and EGG Metric maps for participant F05

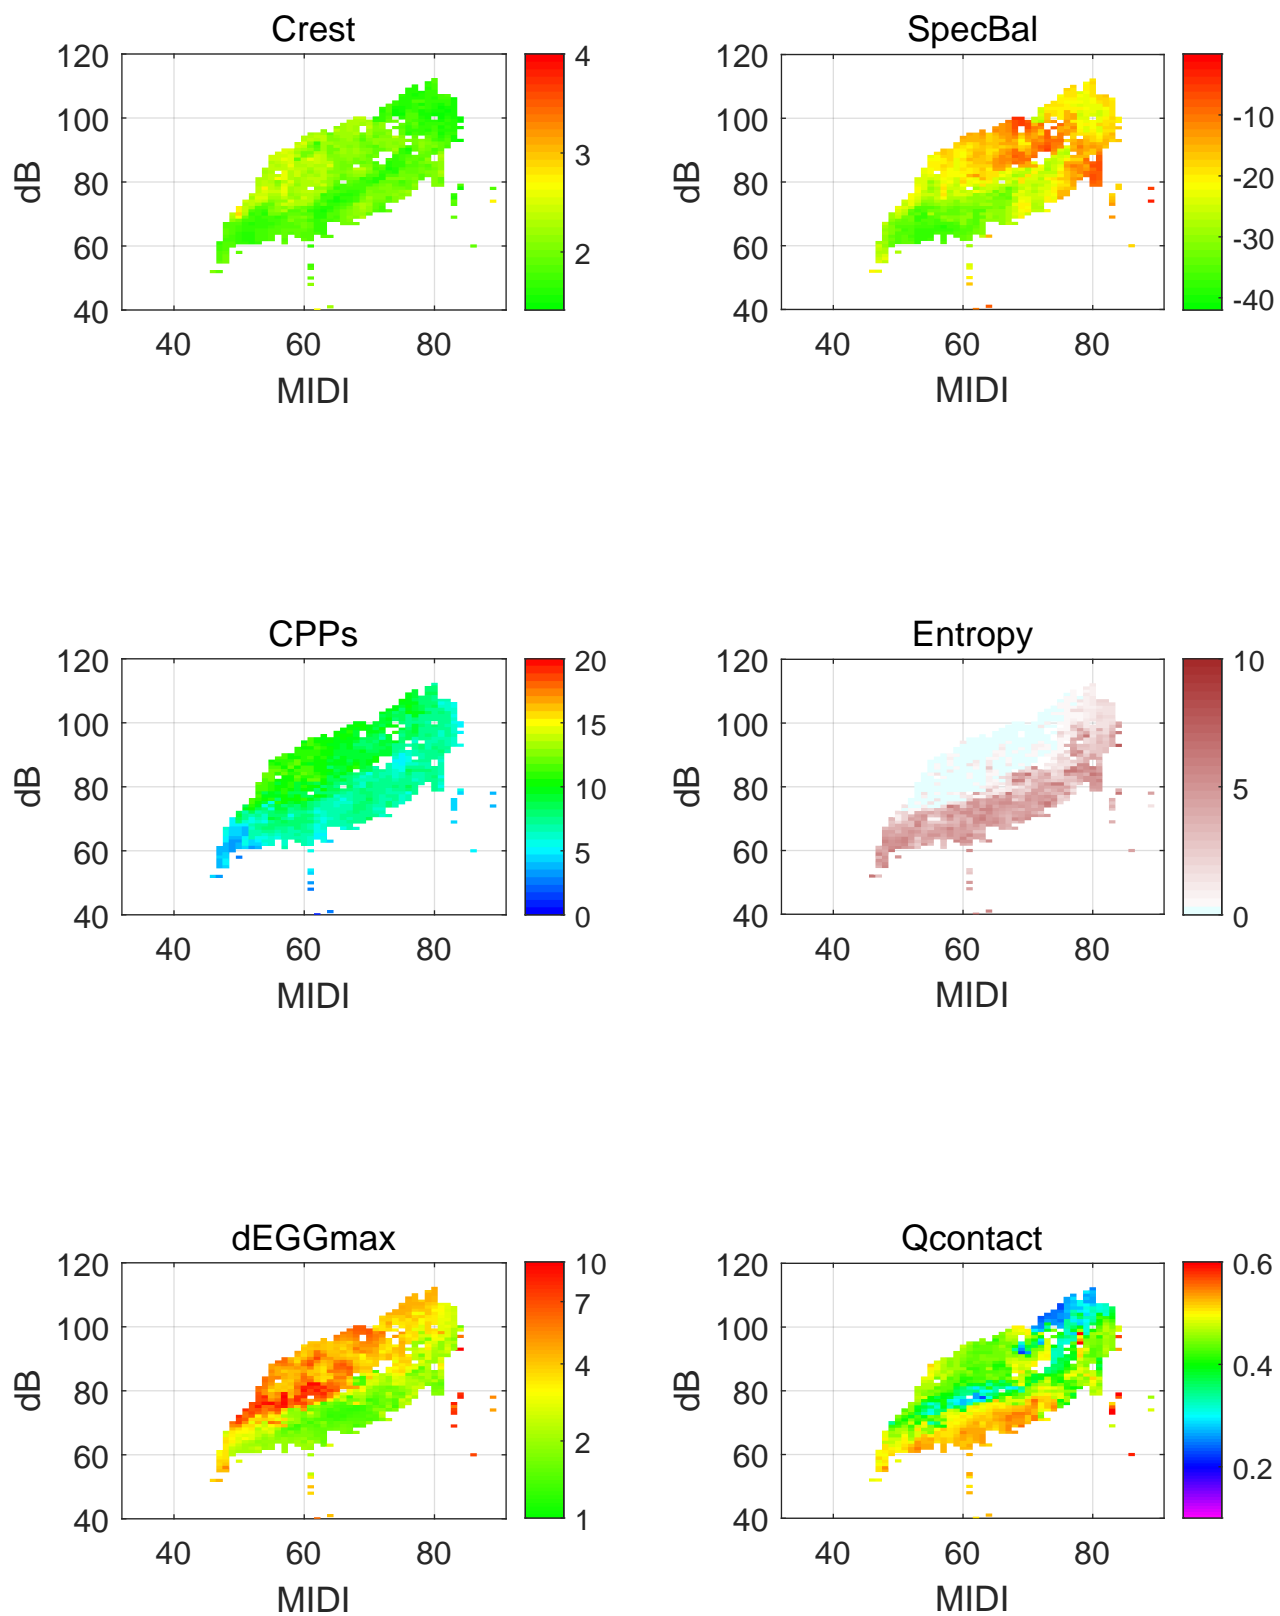



Figure S36: Classification voice maps for participant F06

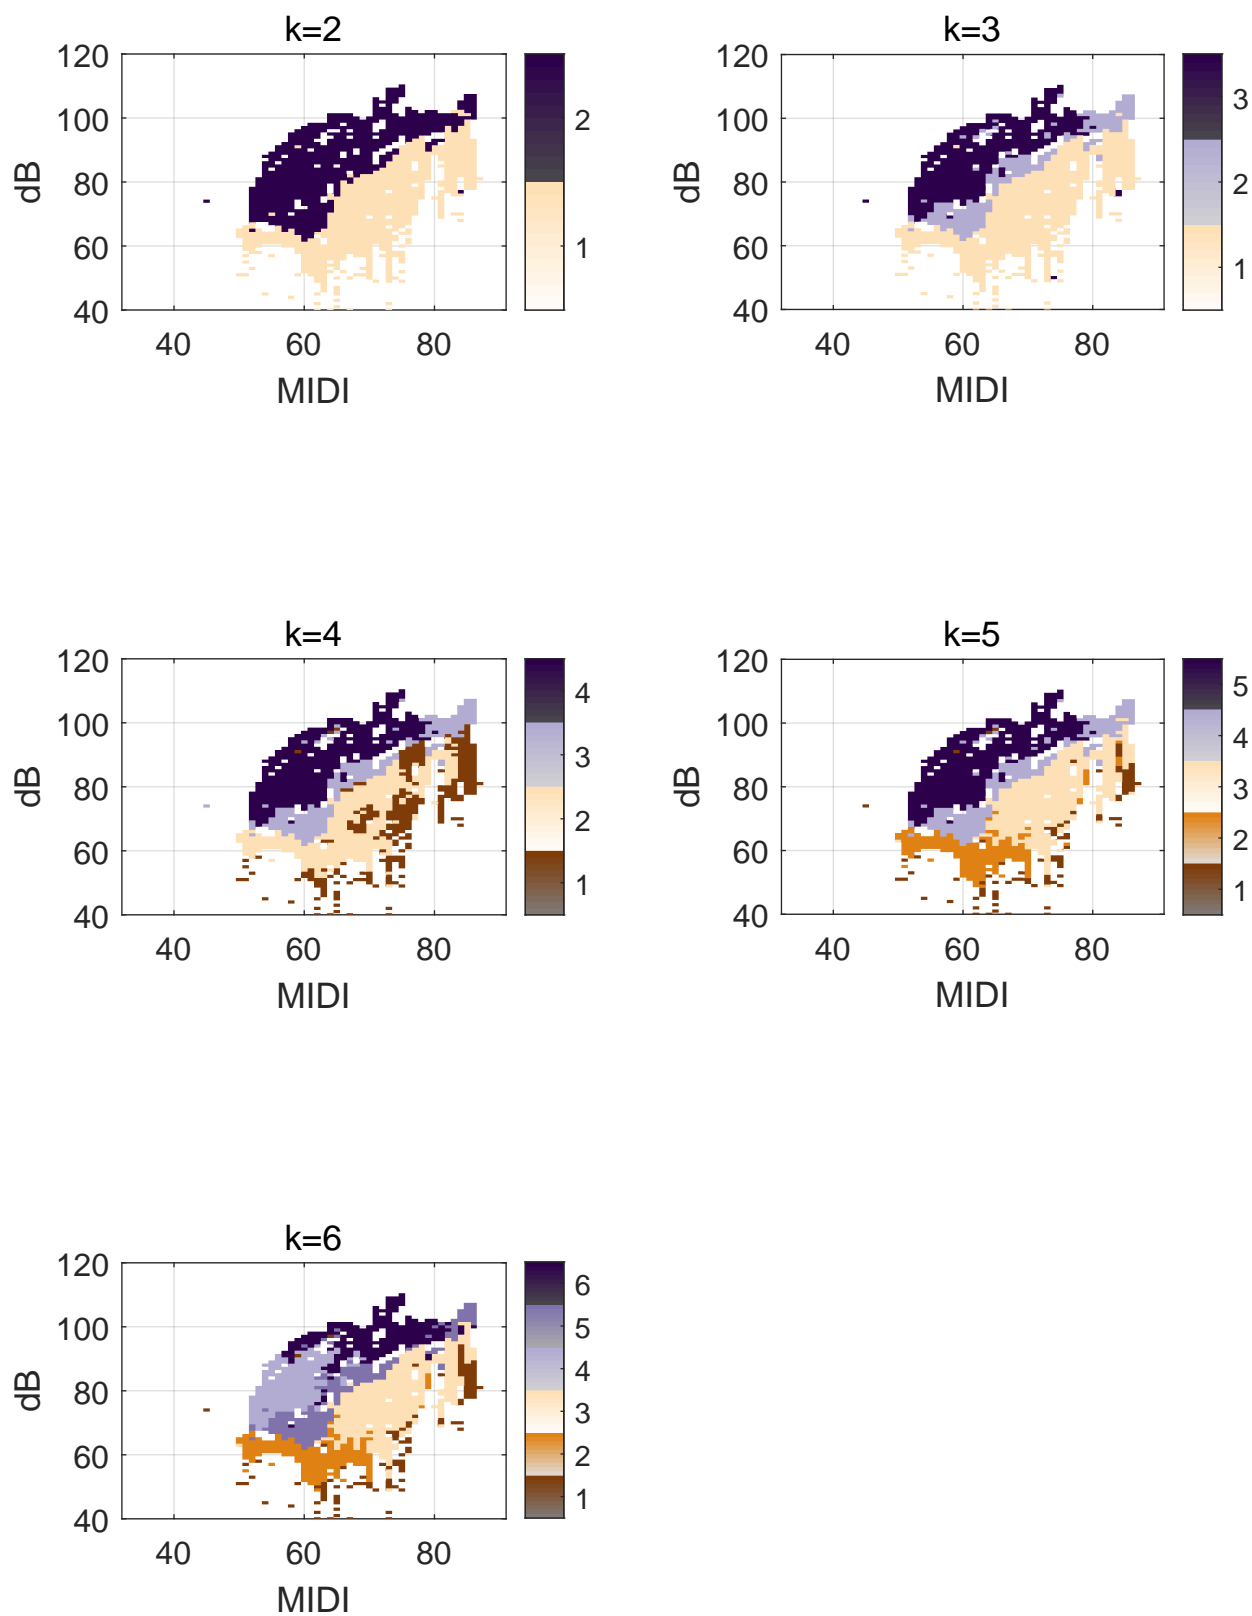

Figure S37: Acoustic and EGG Metric maps for participant F06

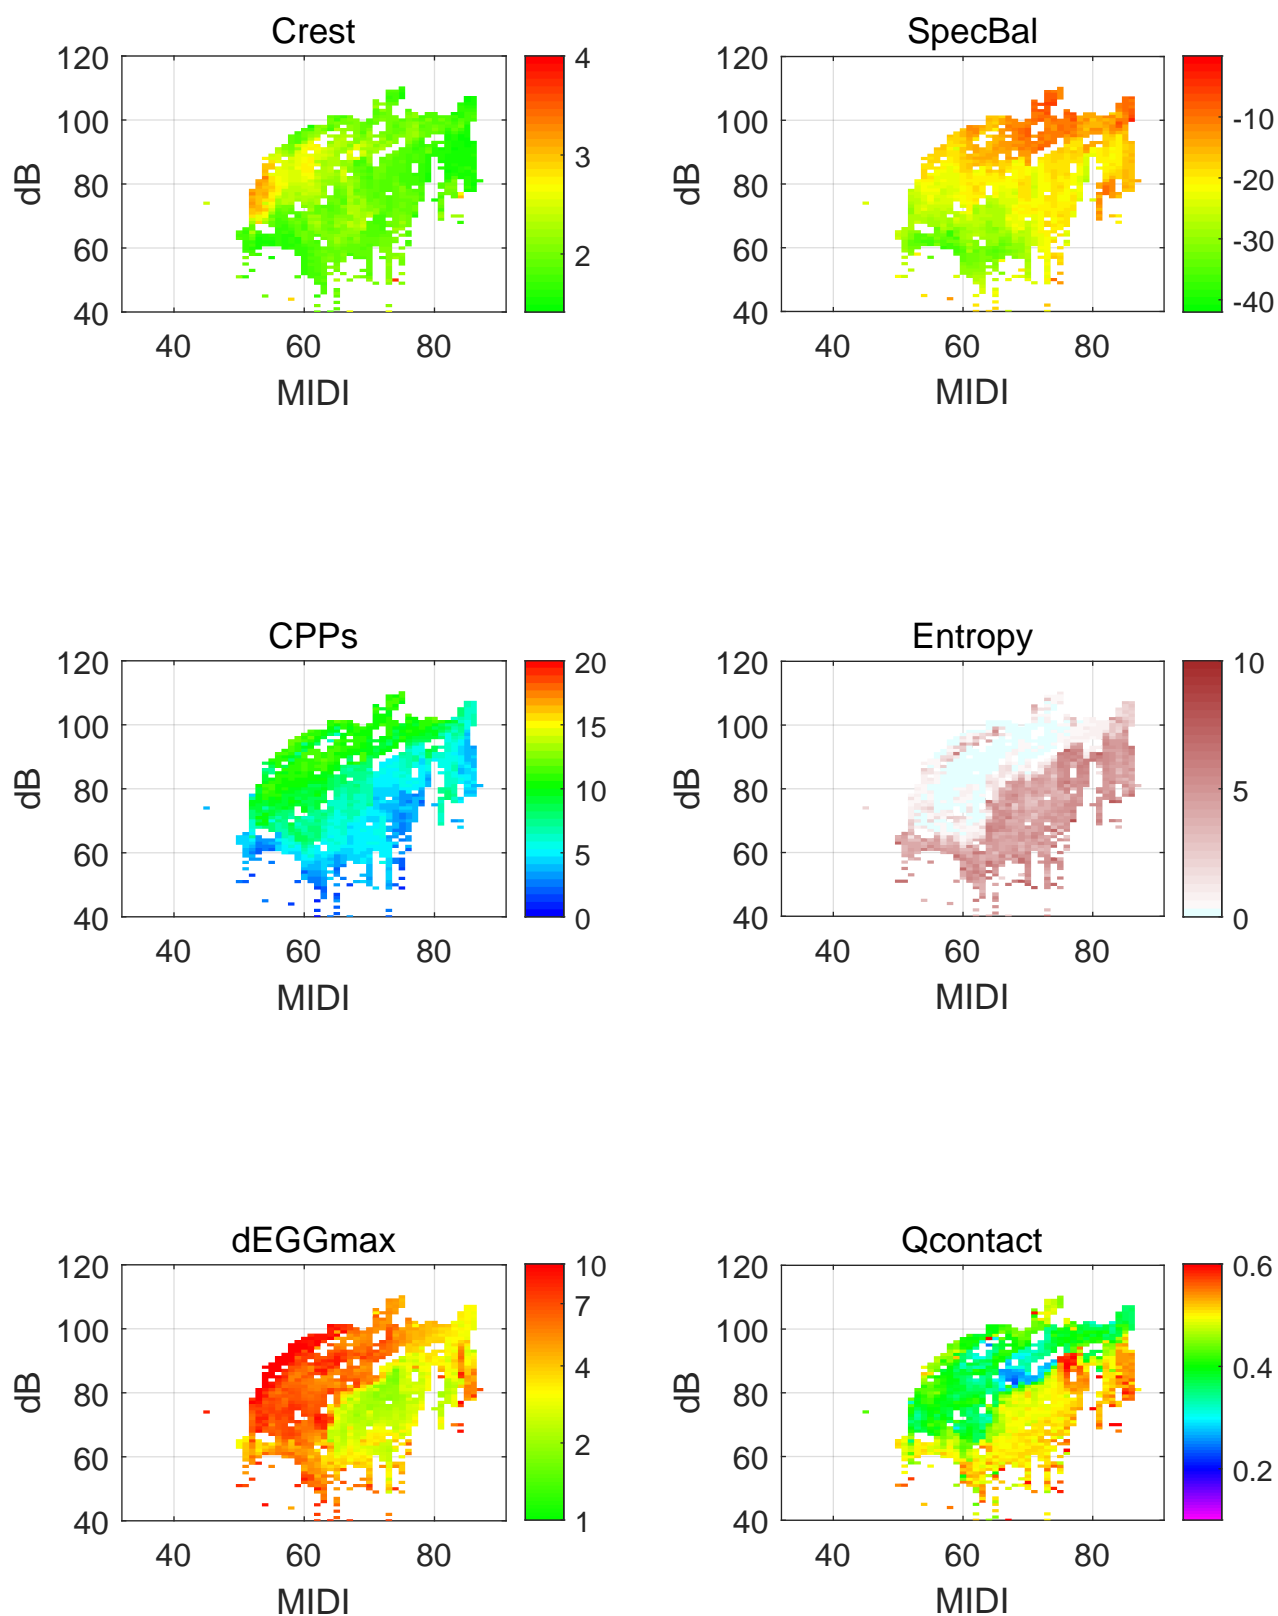

Figure S38: Classification voice maps for participant F07

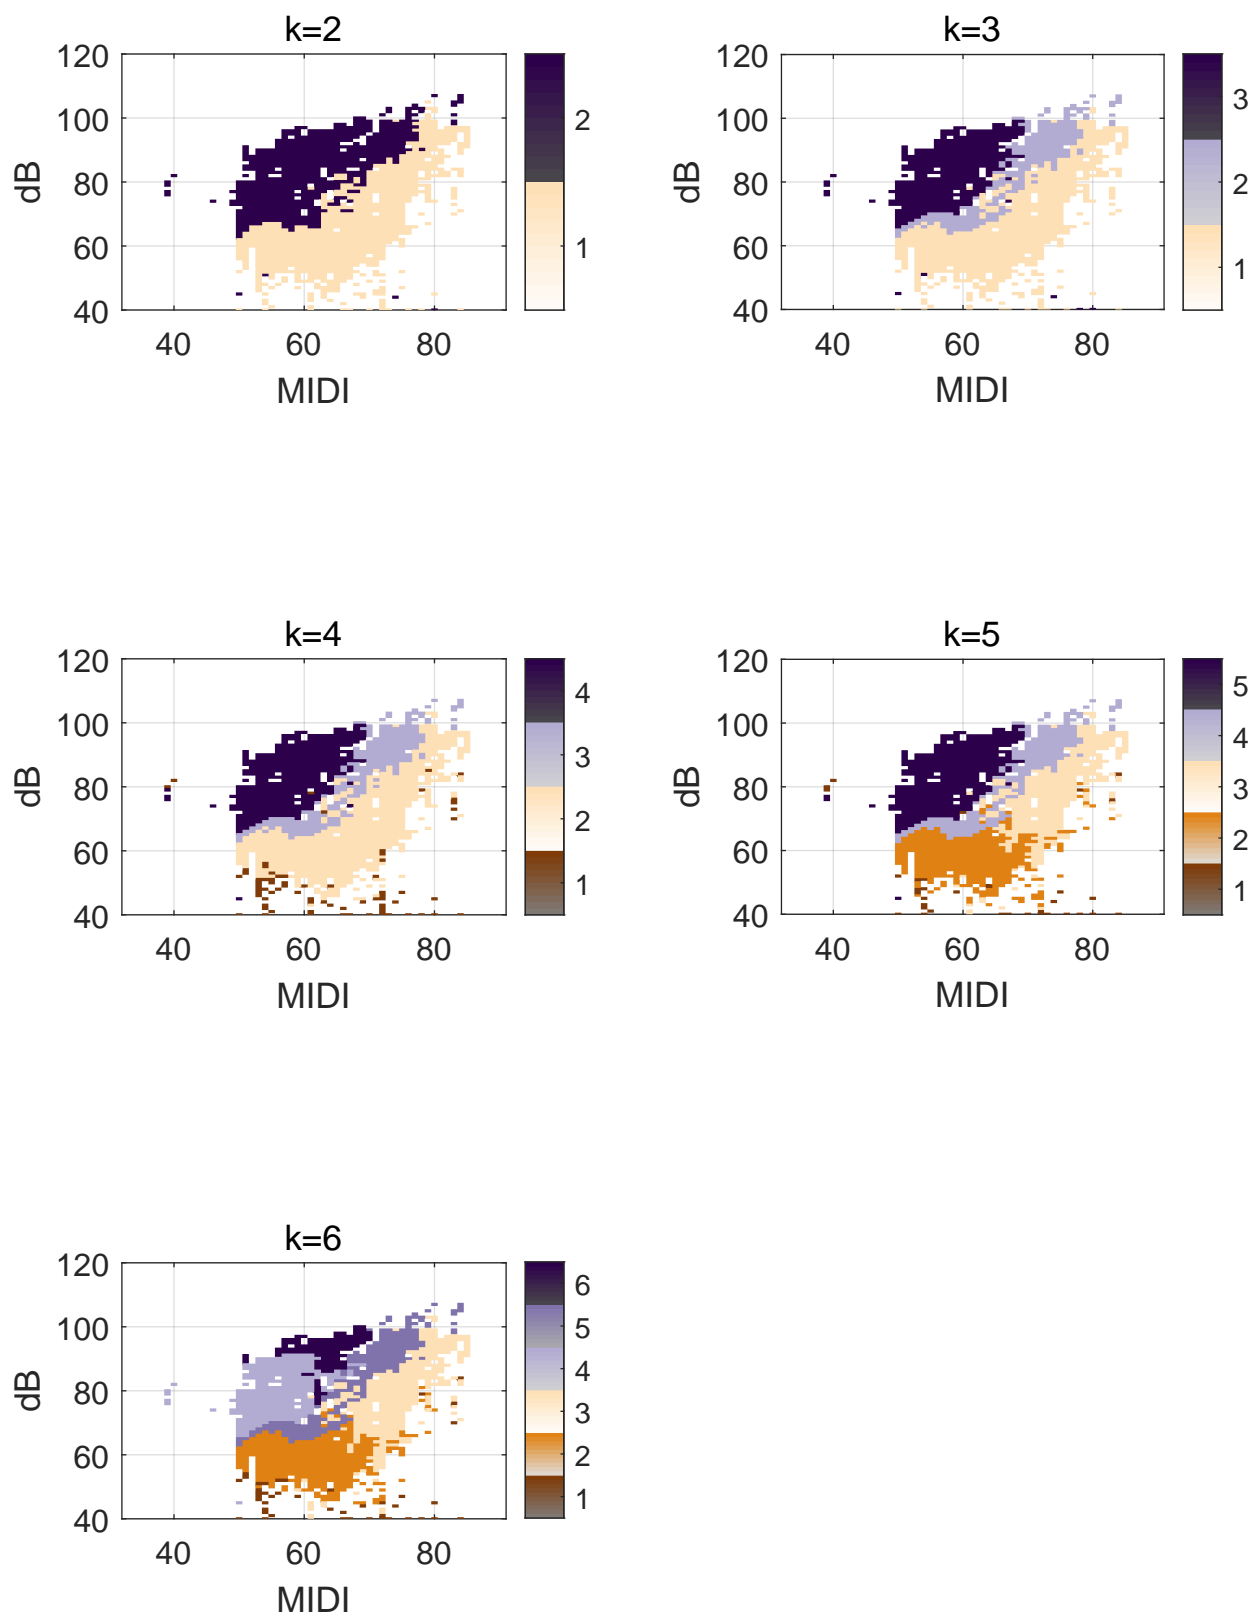

Figure S39: Acoustic and EGG Metric maps for participant F07

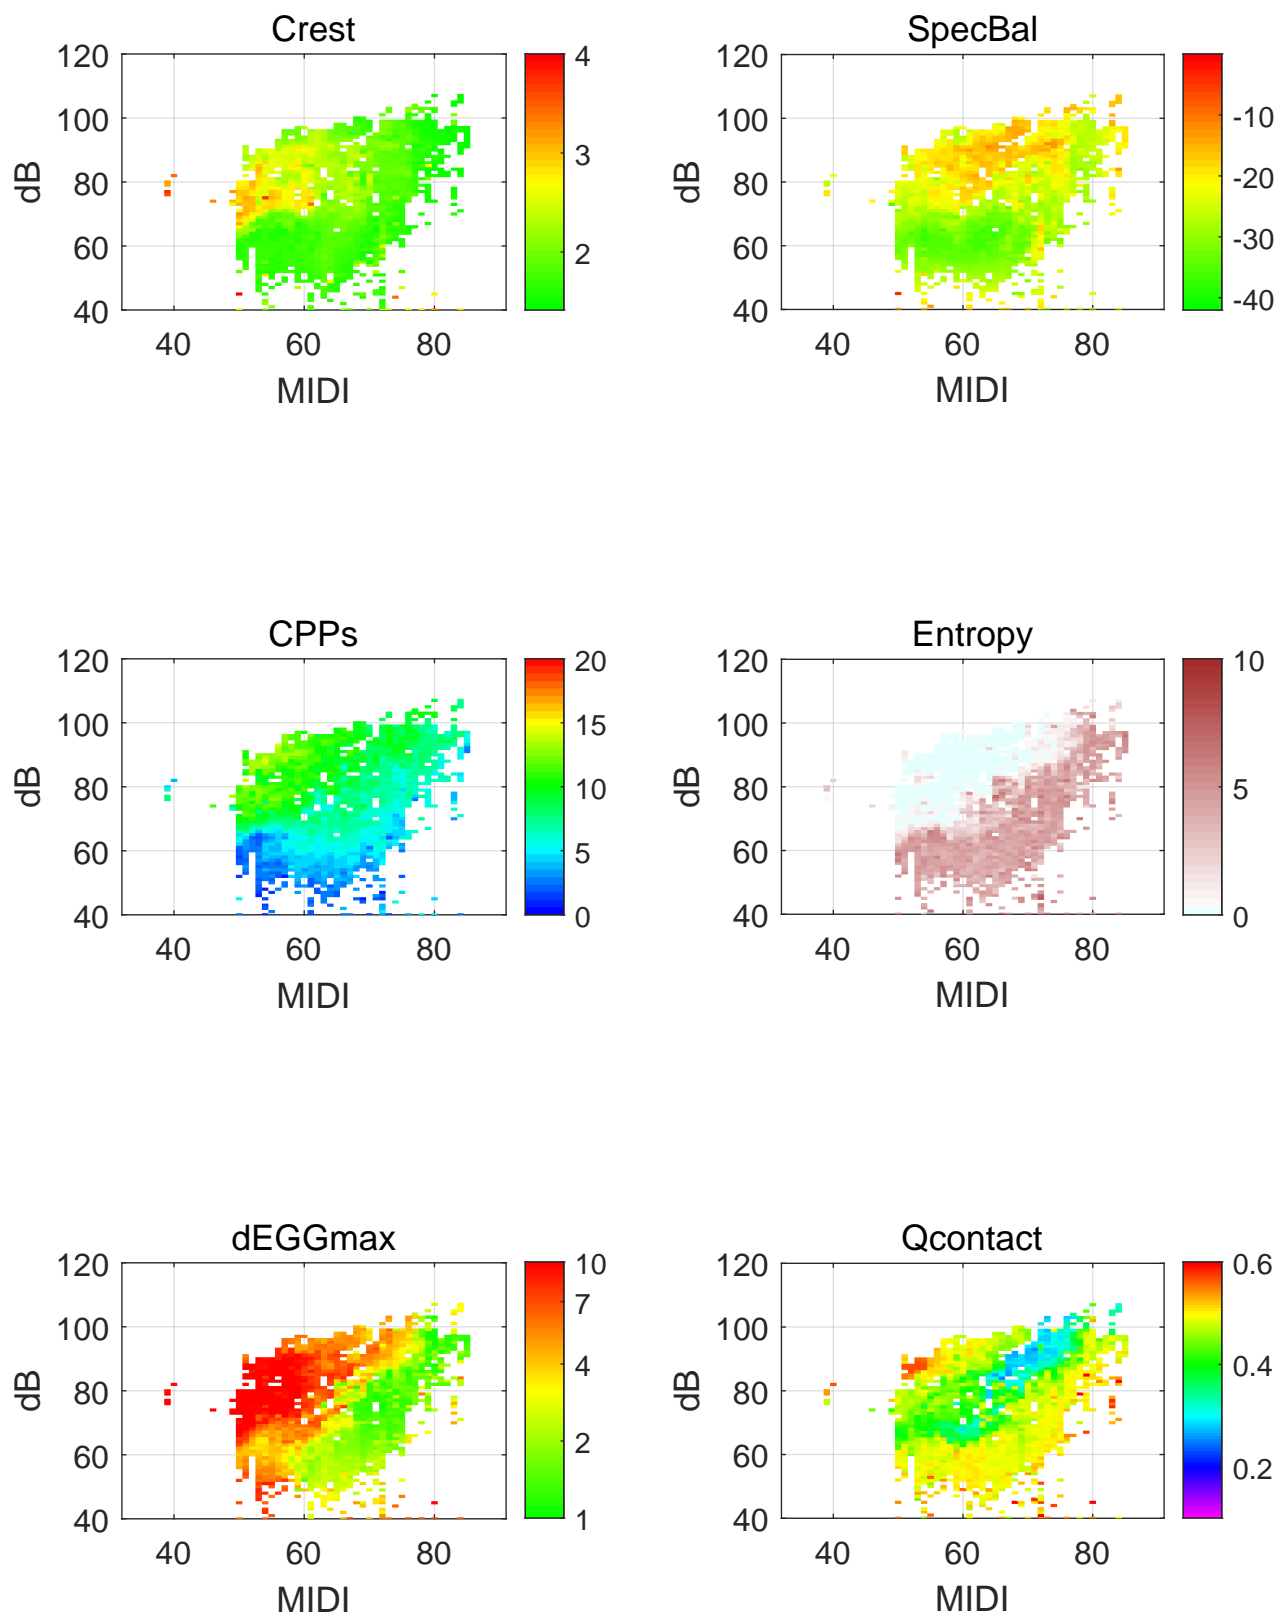

Figure S40: Classification voice maps for participant F08

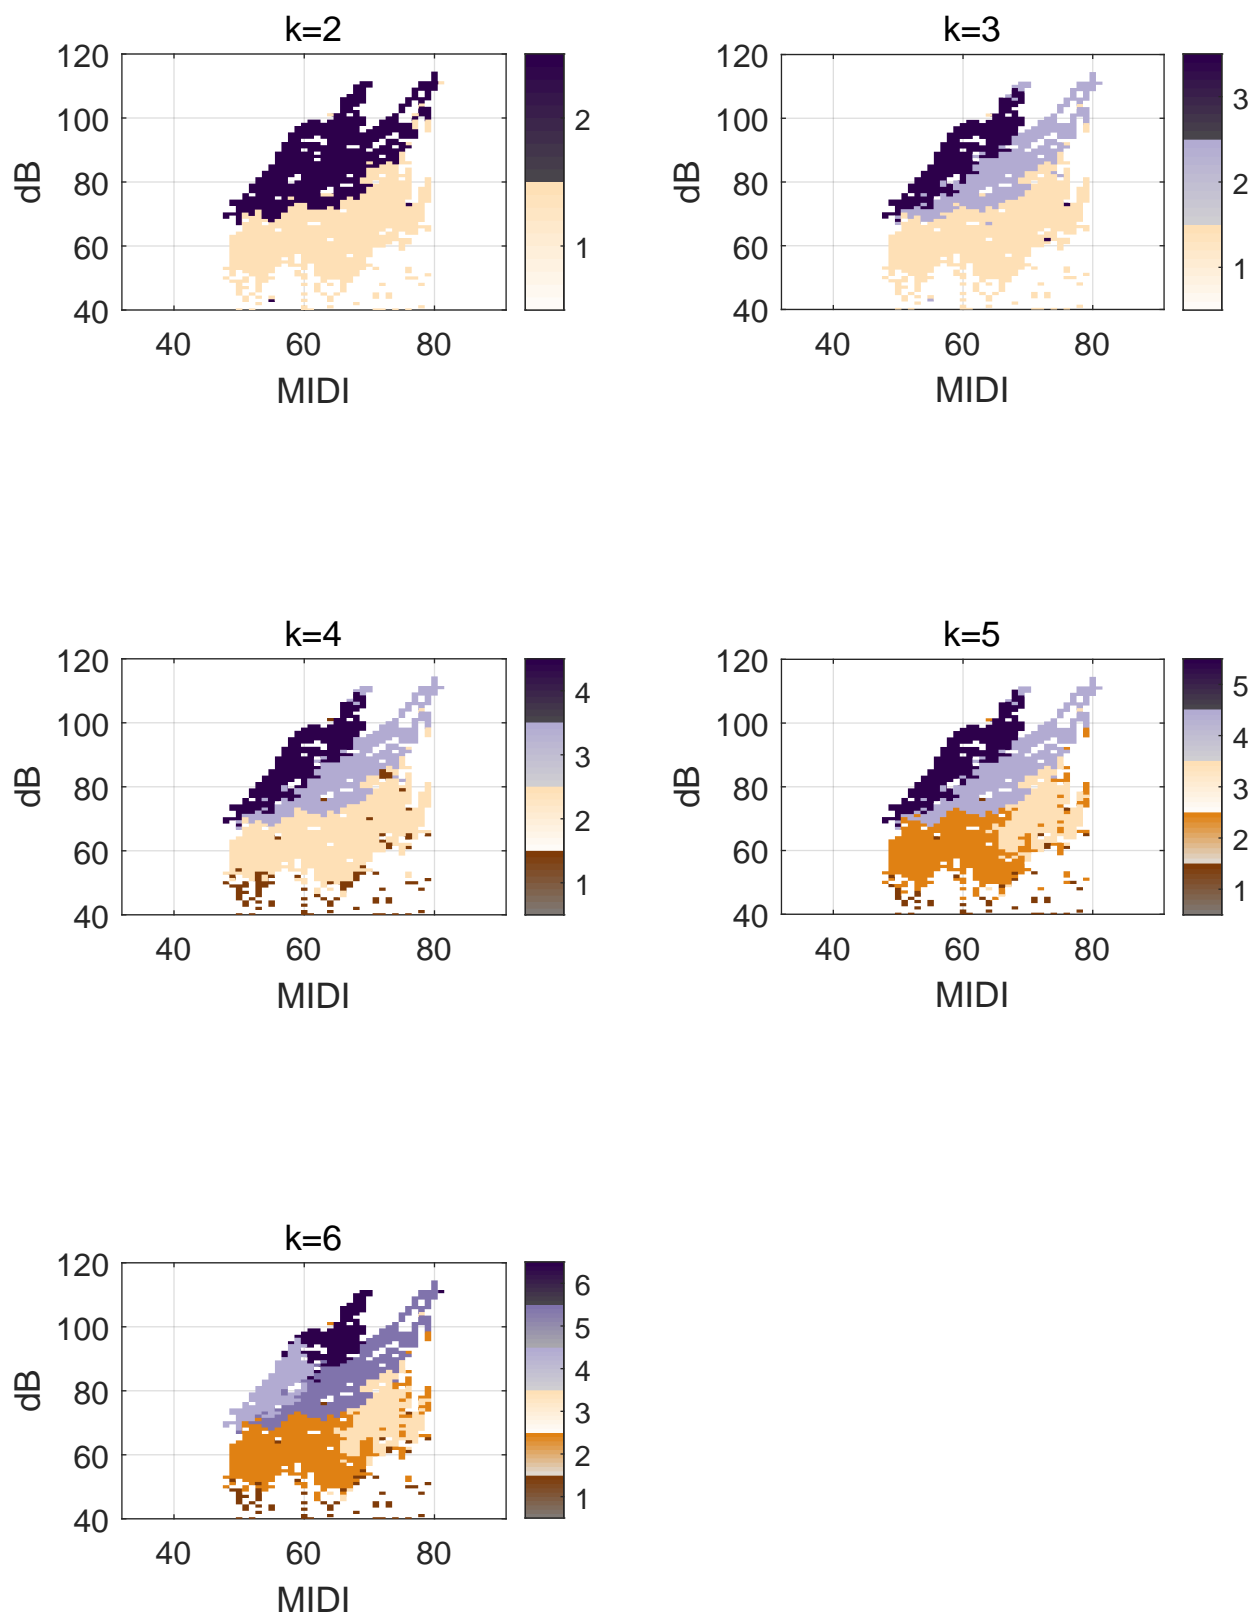

Figure S41: Acoustic and EGG Metric maps for participant F08

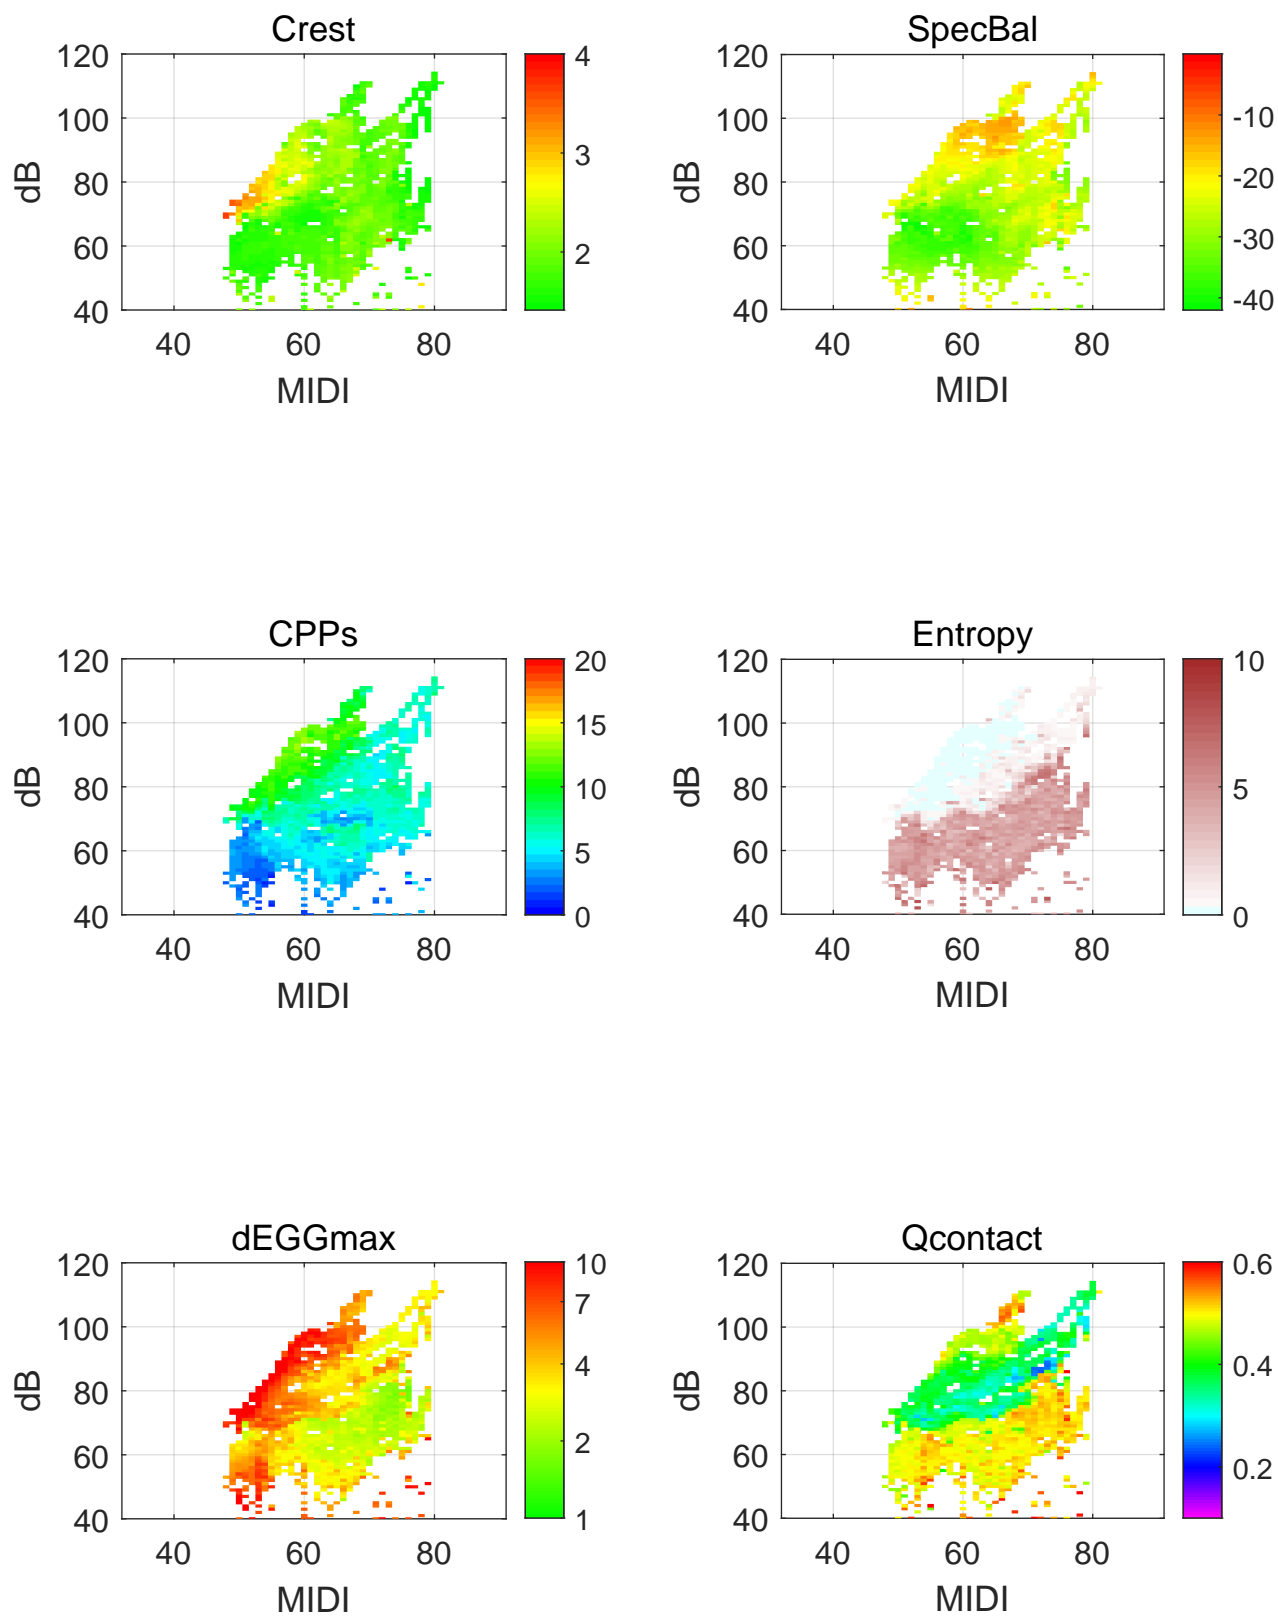

Figure S42: Classification voice maps for participant F09

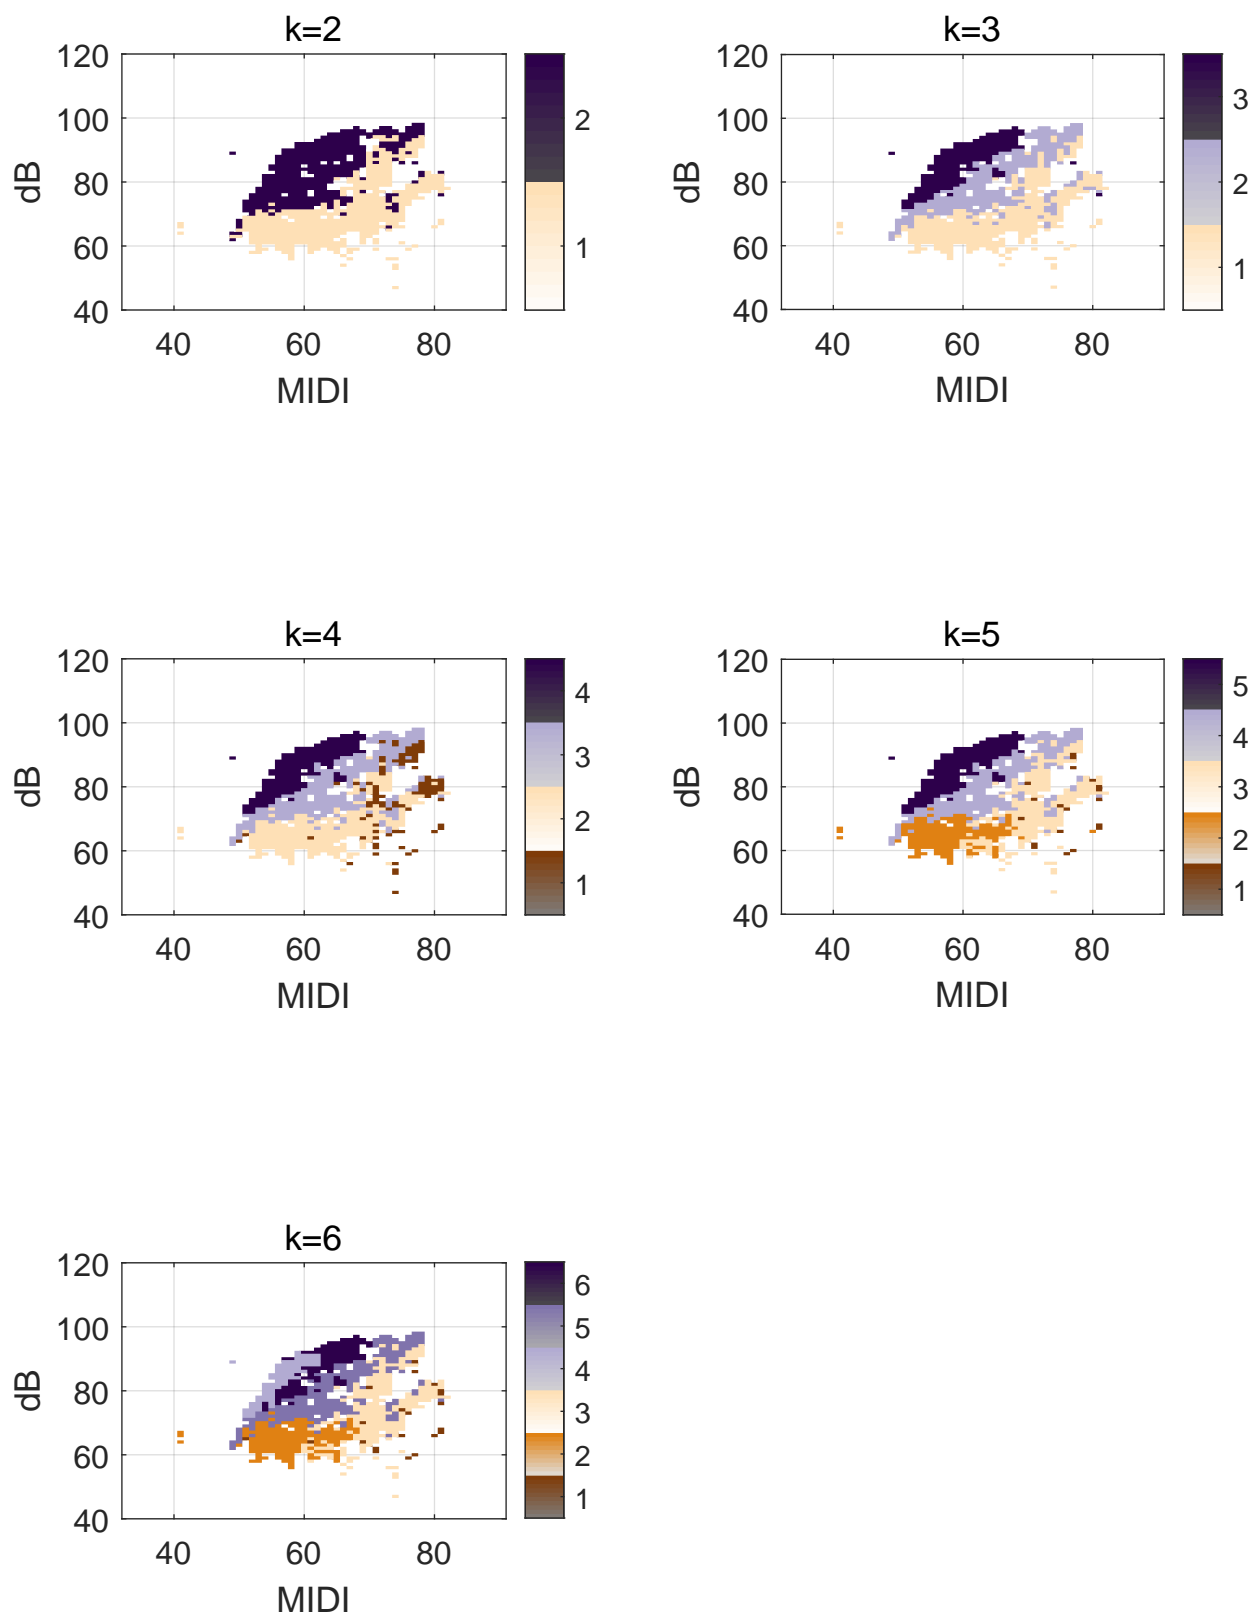

Figure S43: Acoustic and EGG Metric maps for participant F09

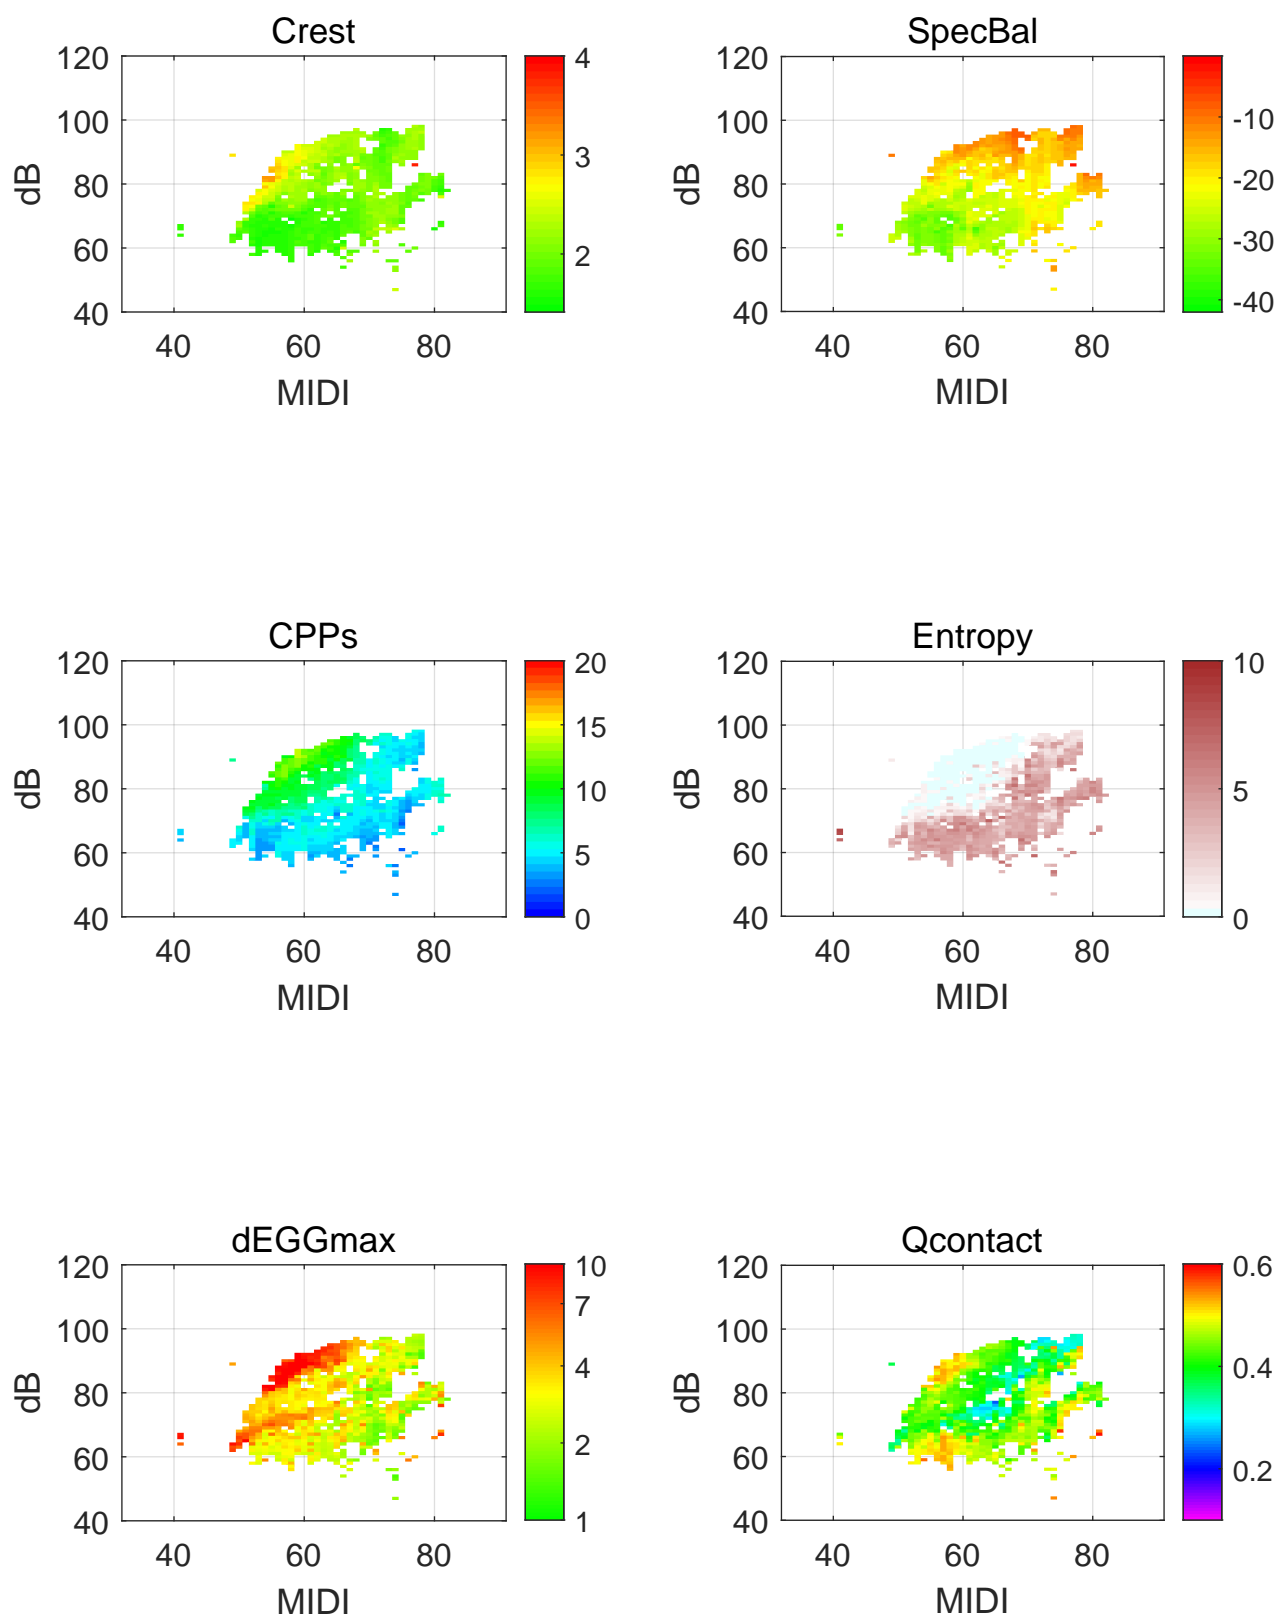



Figure S44: Classification voice maps for participant F10

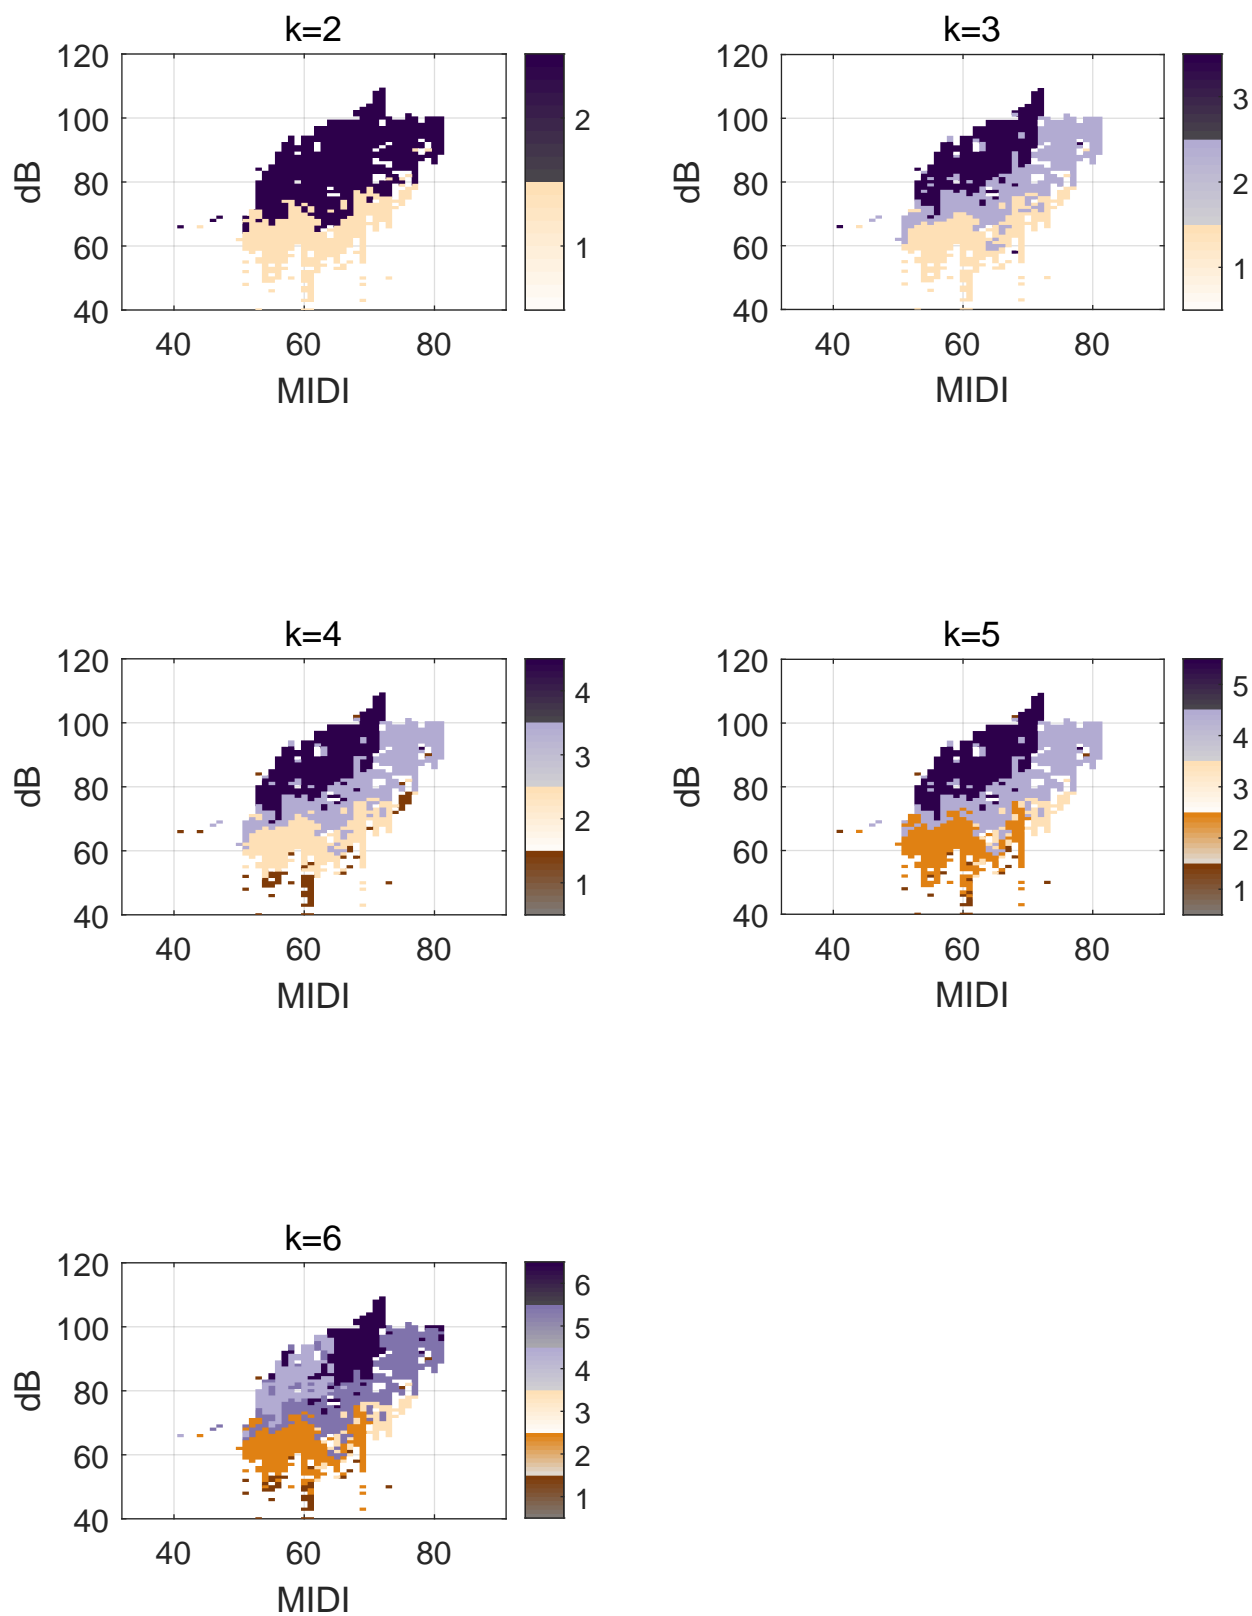

Figure S45: Acoustic and EGG Metric maps for participant F10

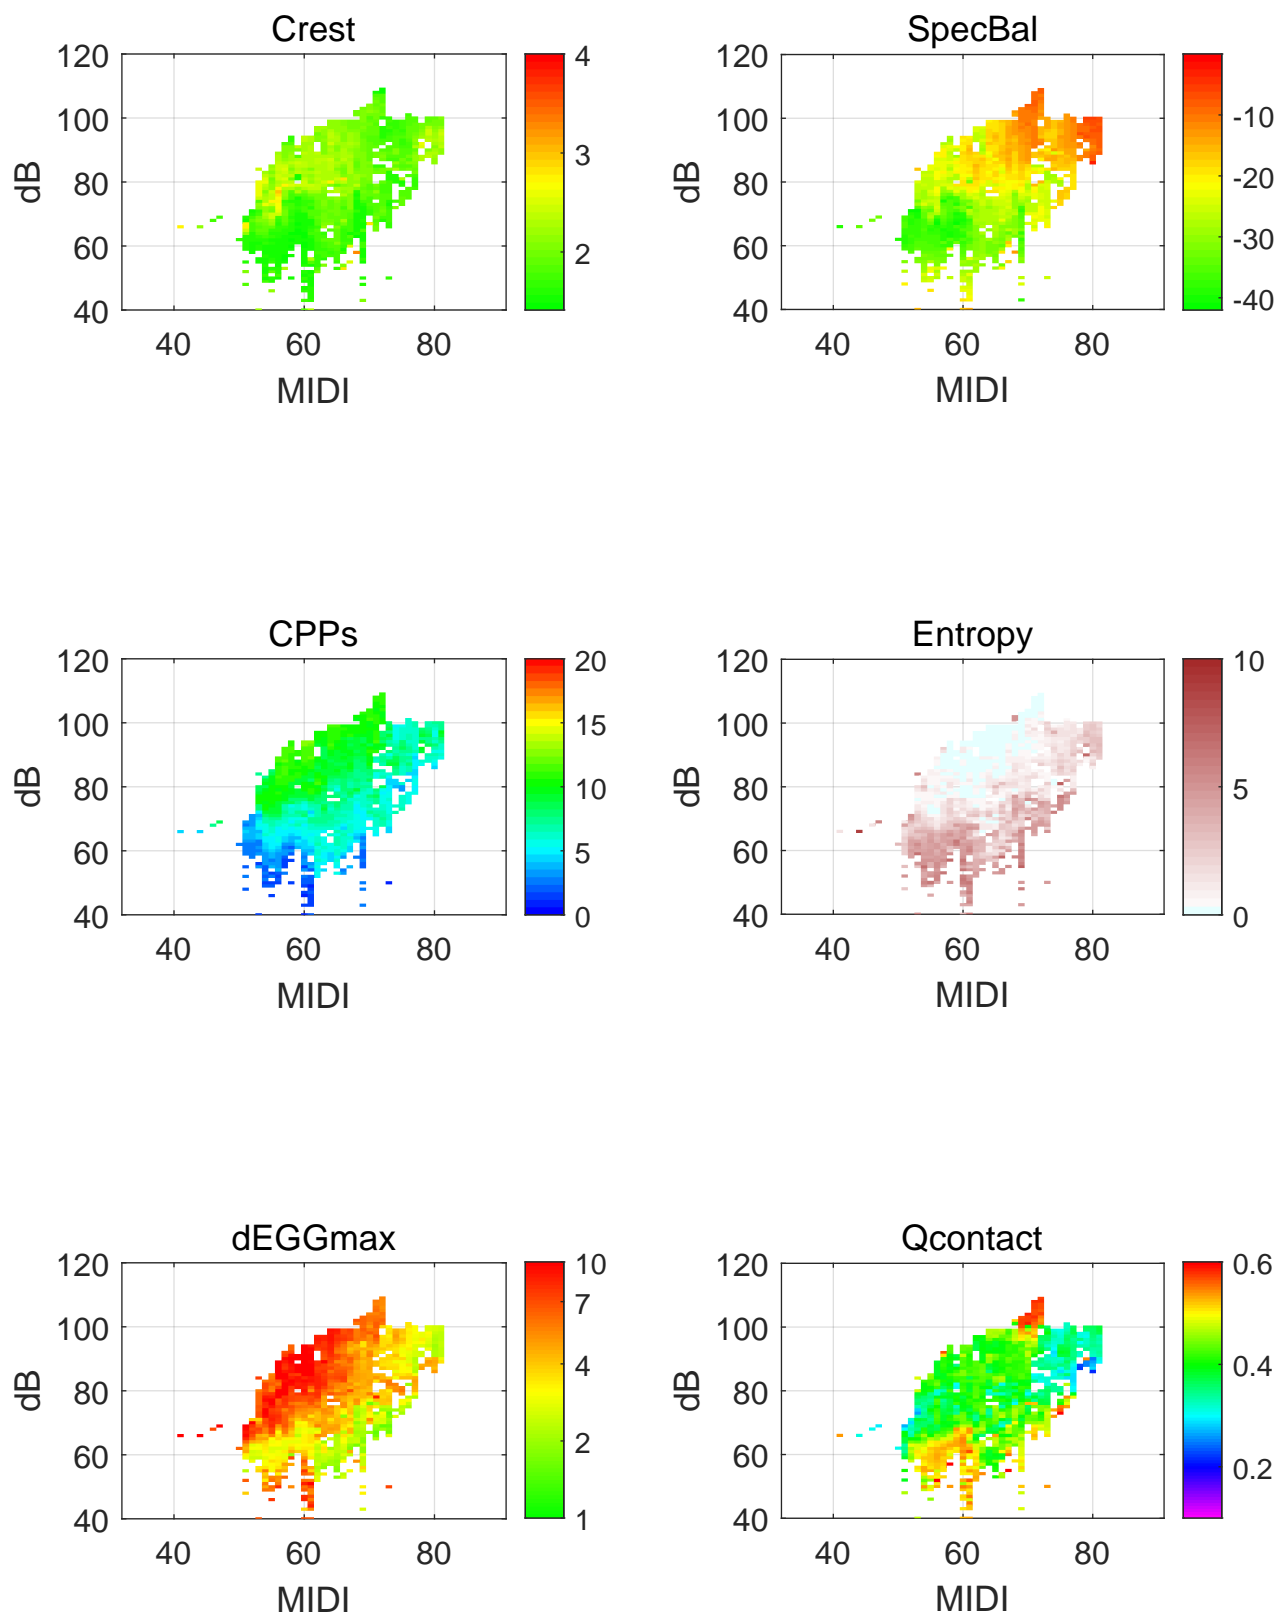

Figure S46: Classification voice maps for participant F11

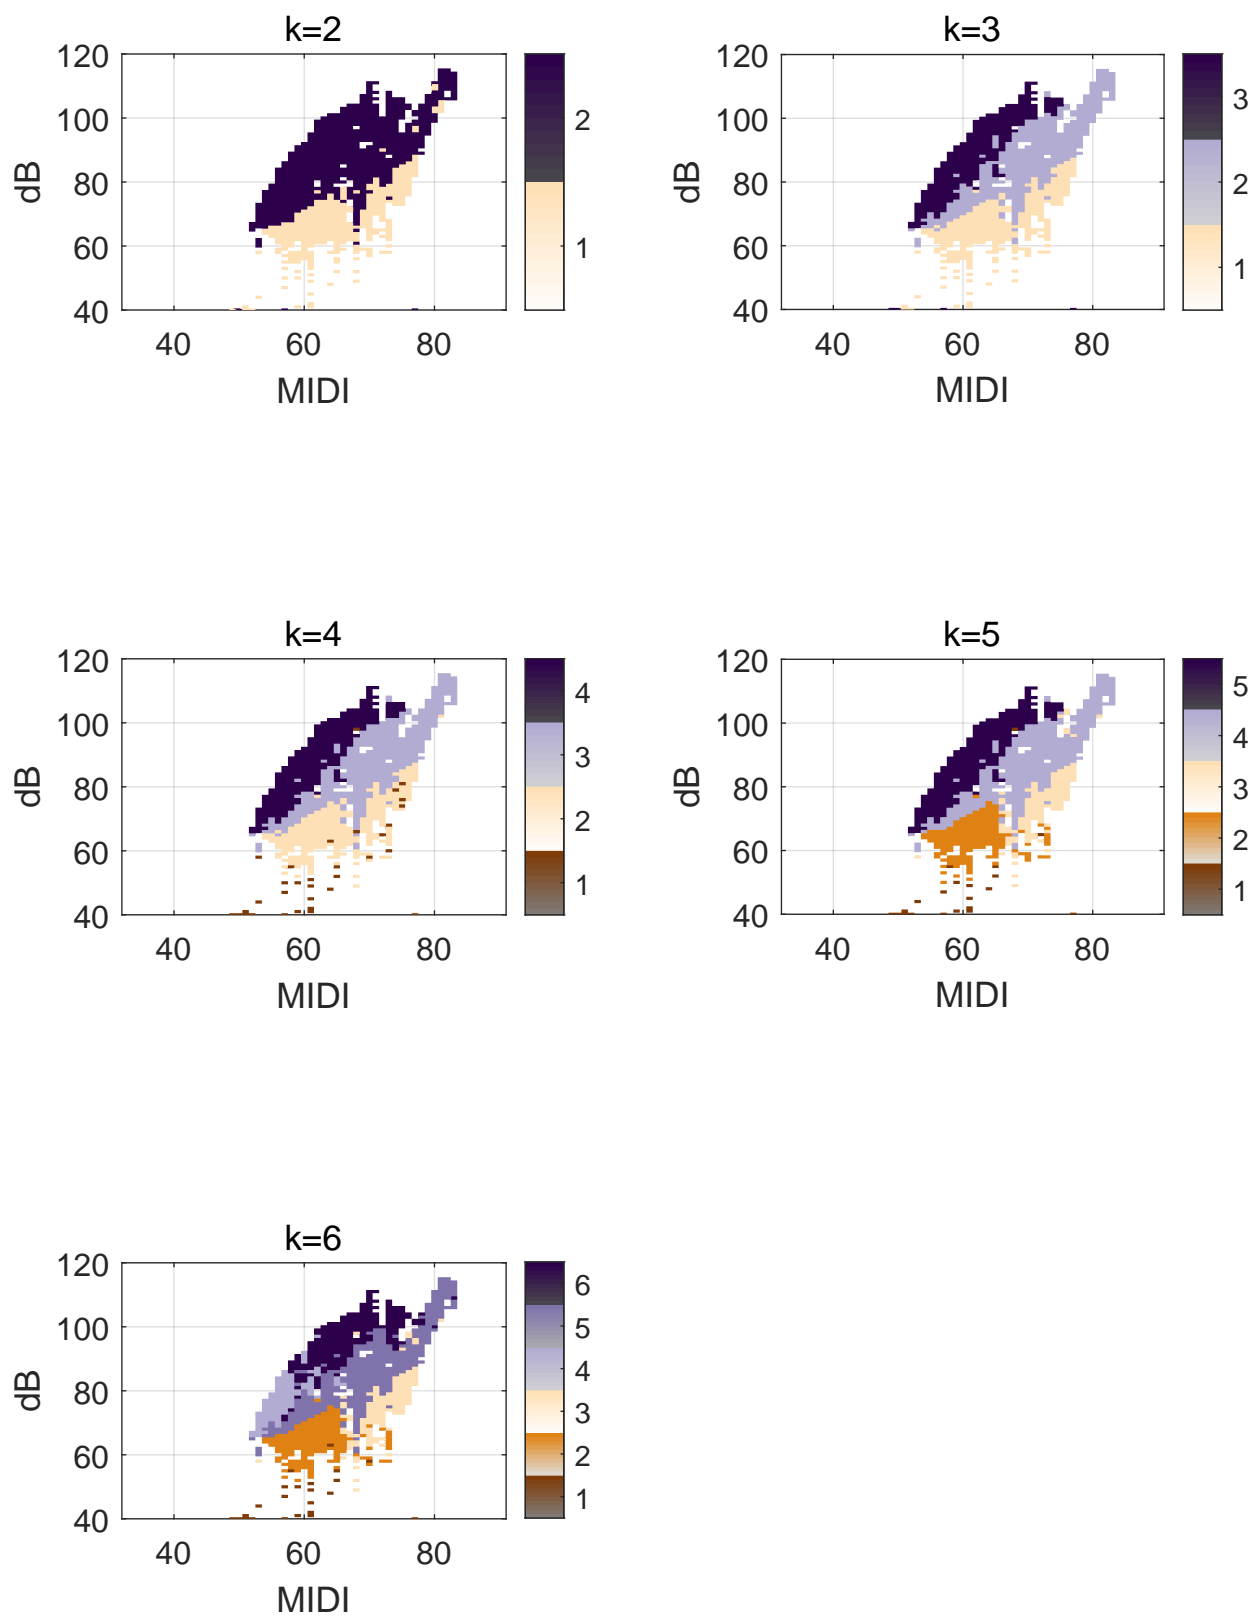

Figure S47: Acoustic and EGG Metric maps for participant F11

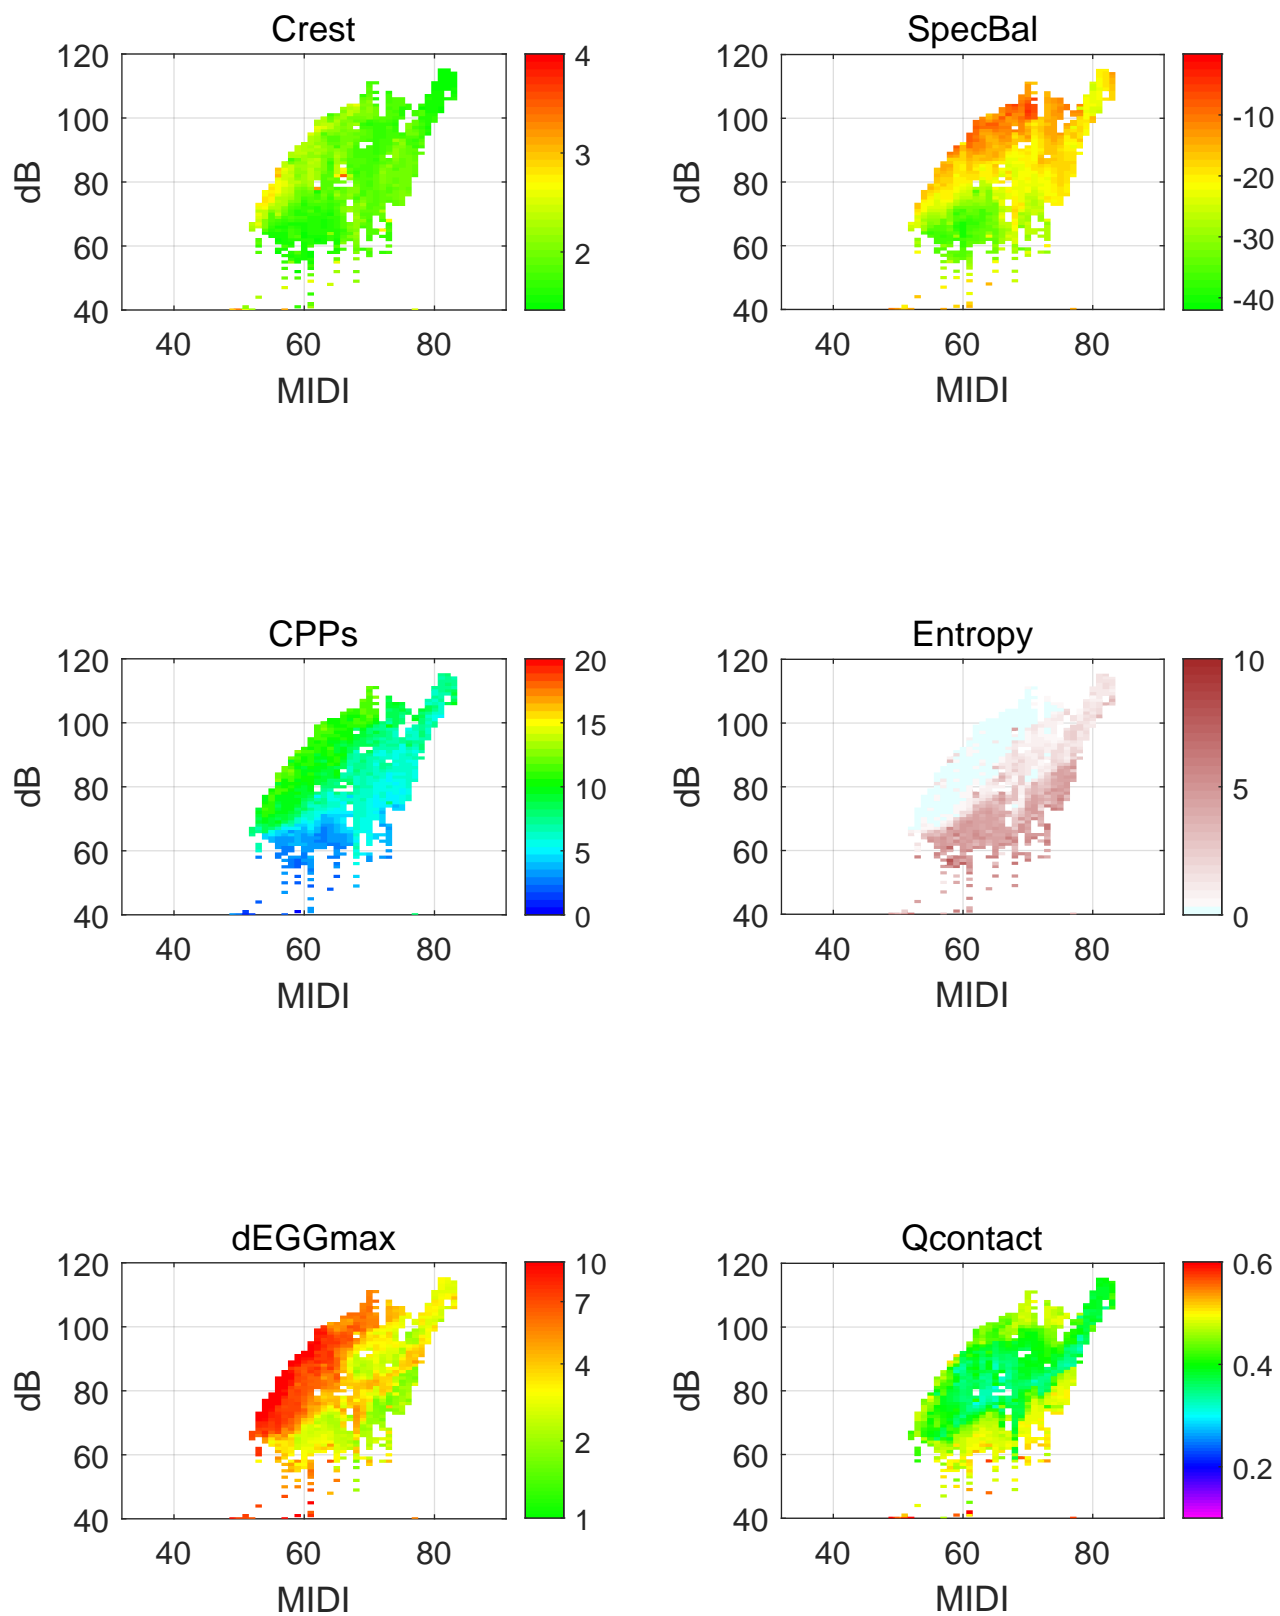

Figure S48: Classification voice maps for participant F12

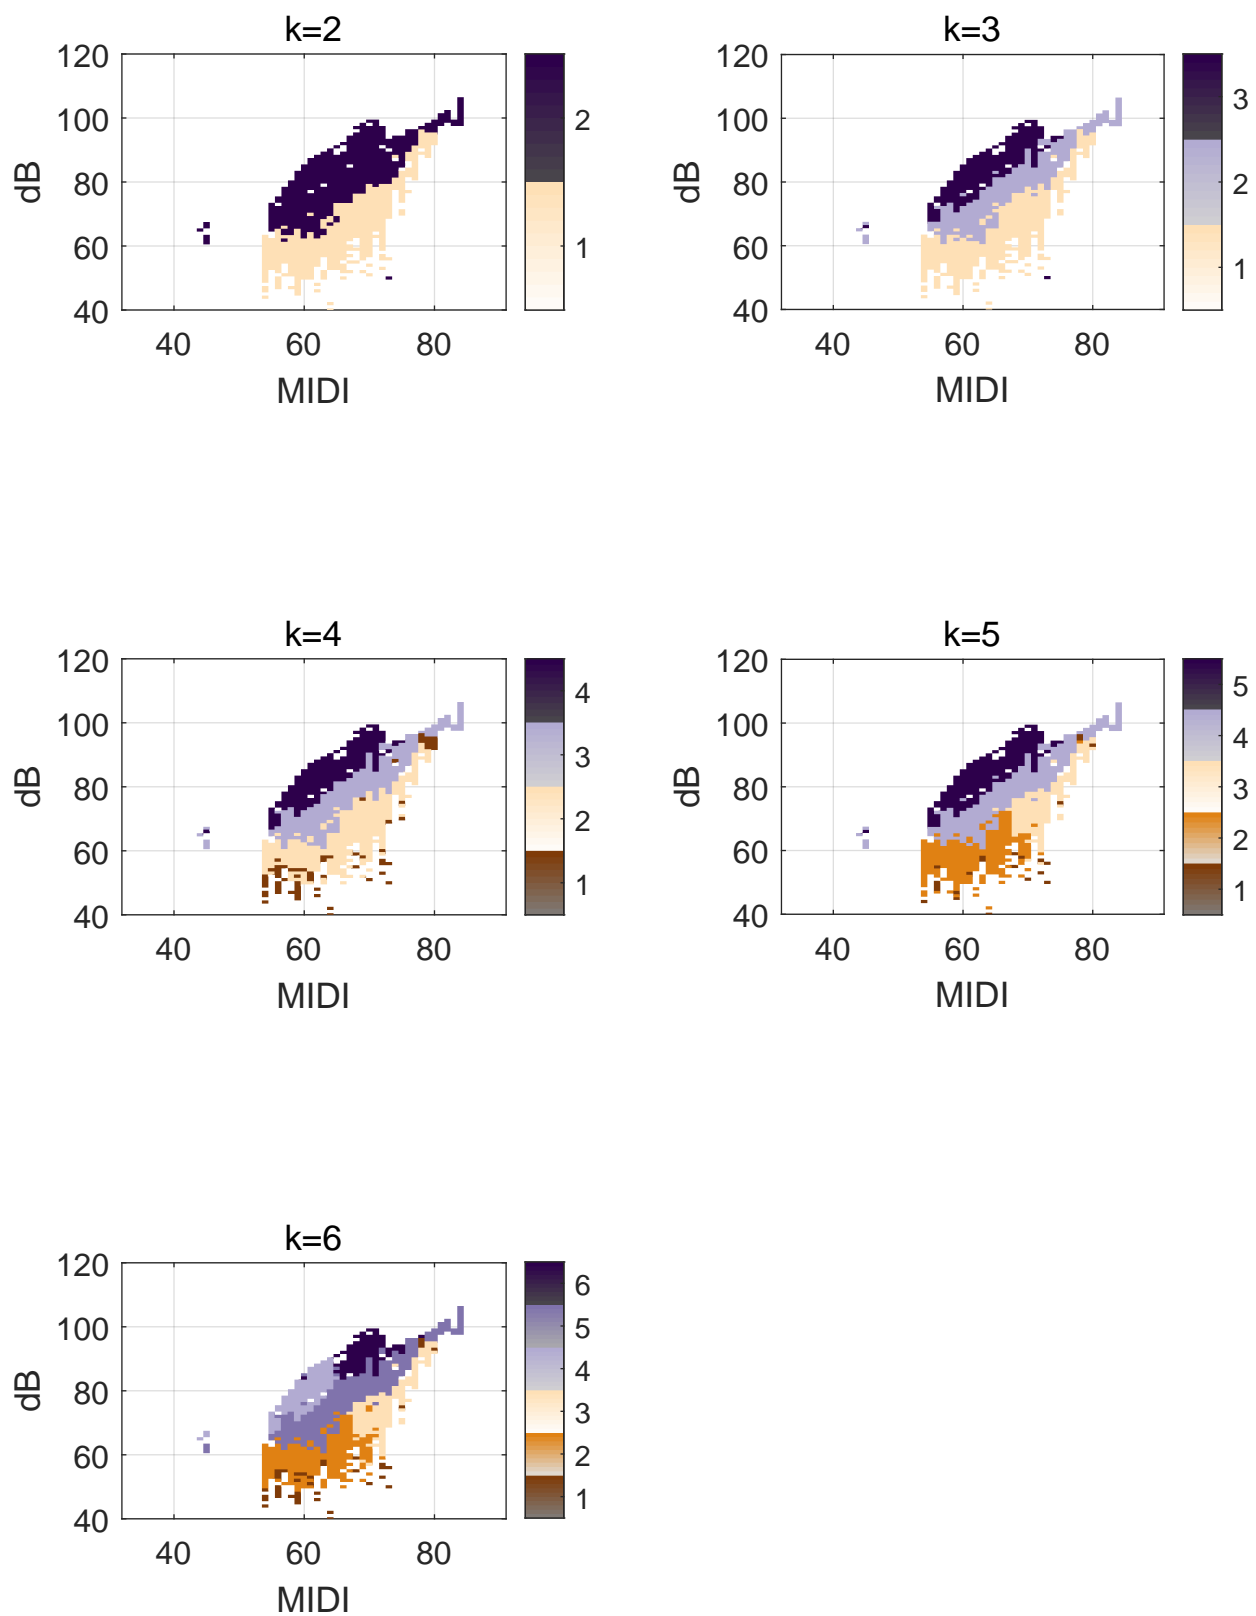

Figure S49: Acoustic and EGG Metric maps for participant F12

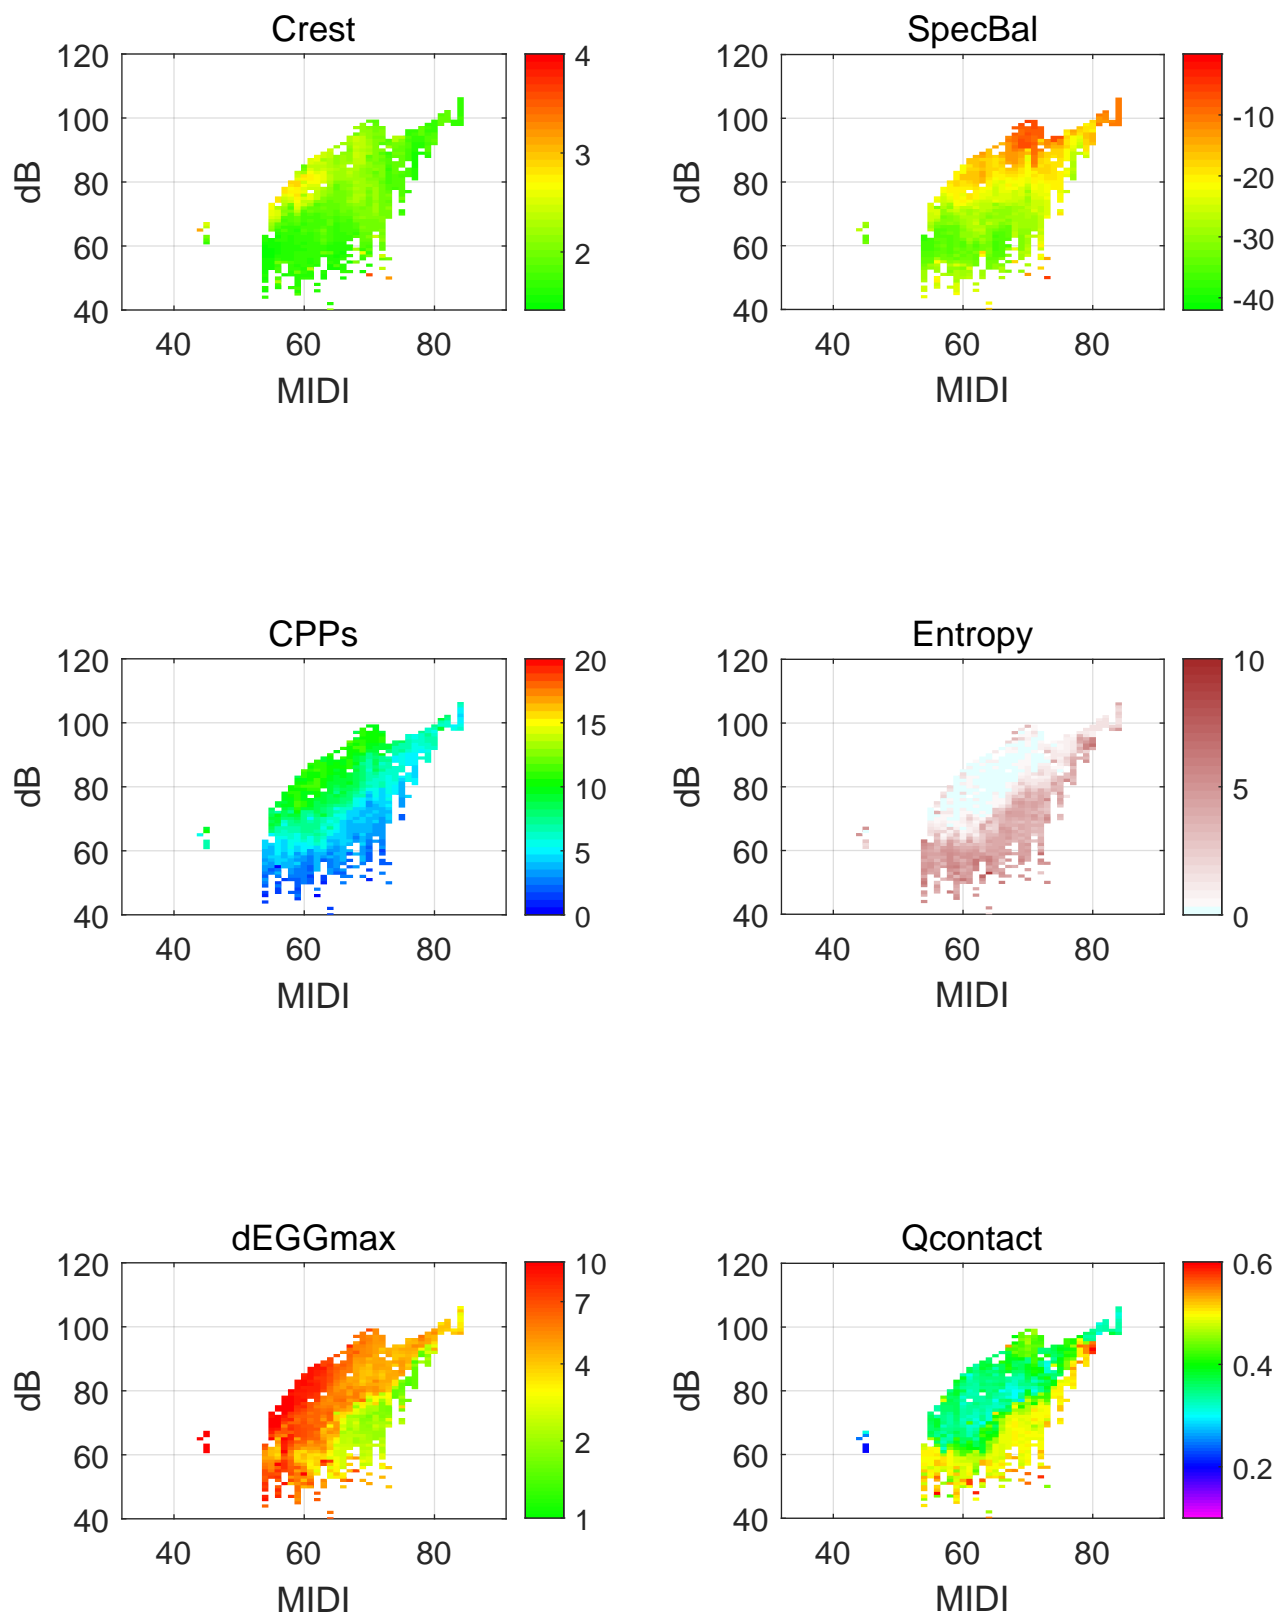

Figure S50: Classification voice maps for participant F13

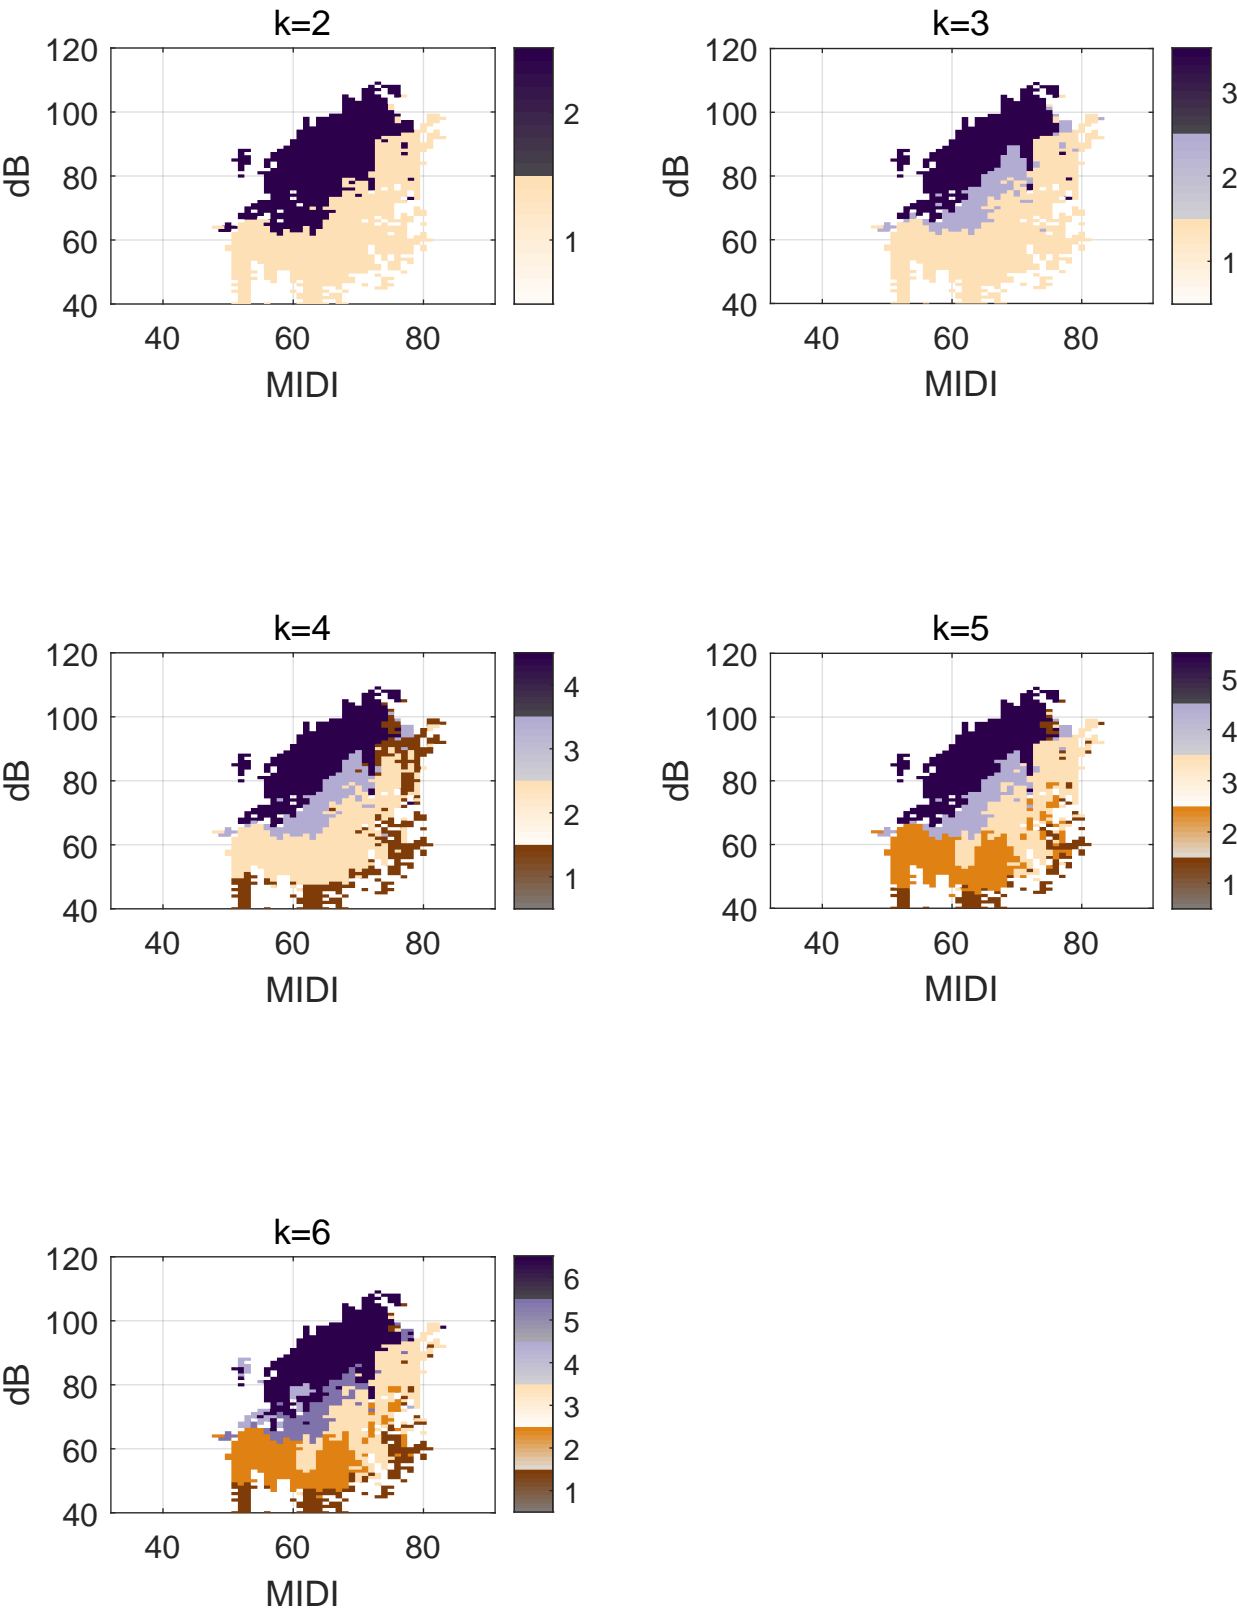

Figure S51: Acoustic and EGG Metric maps for participant F13

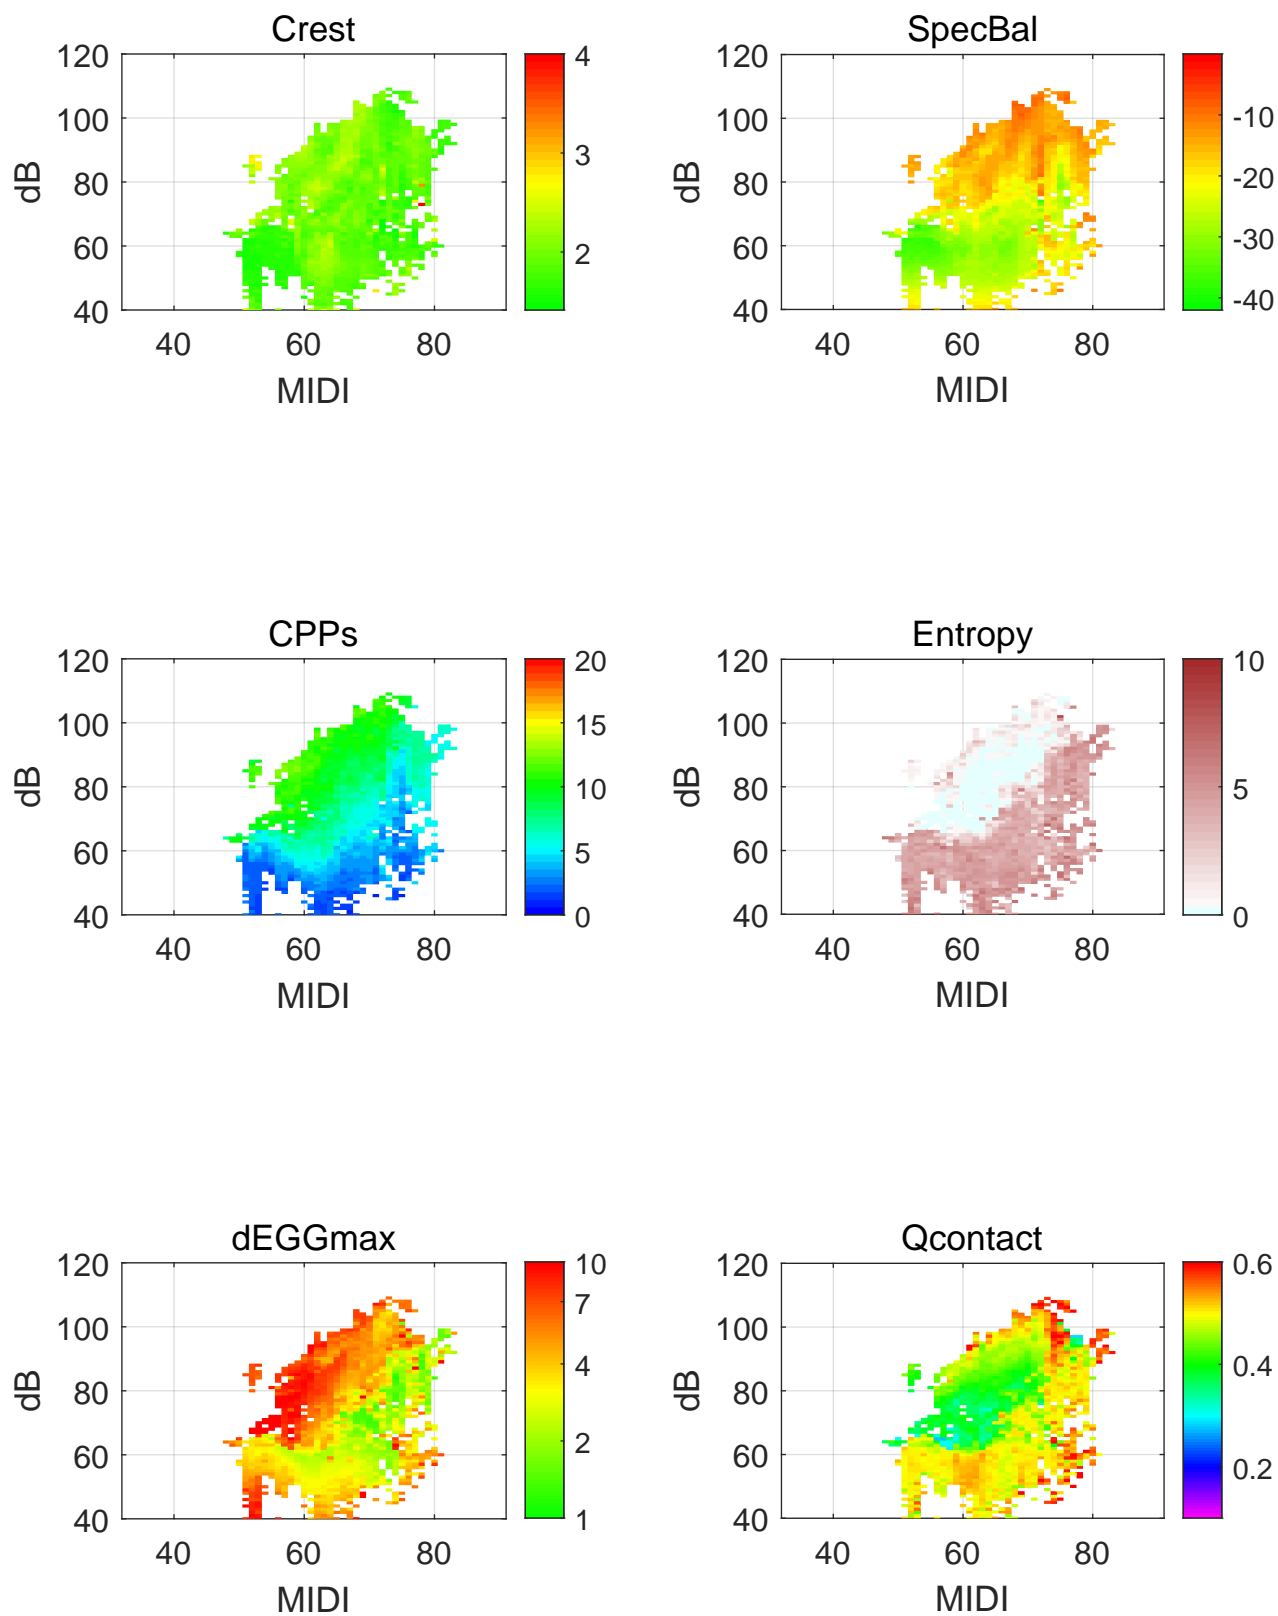



Figure S52: Centroid polar in percentage for Females group

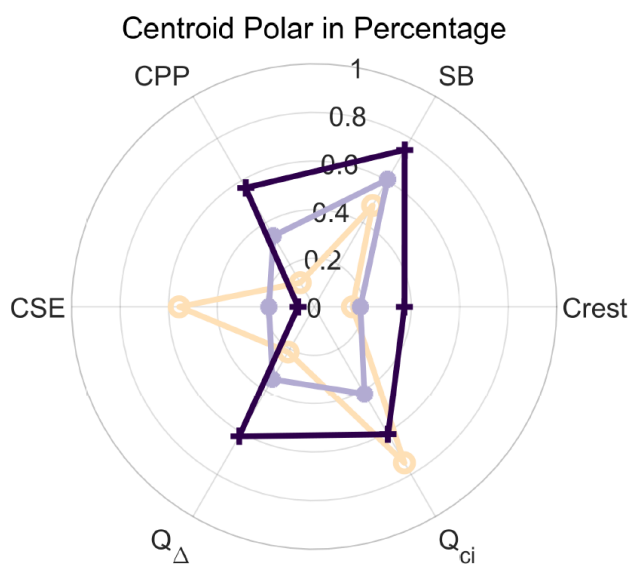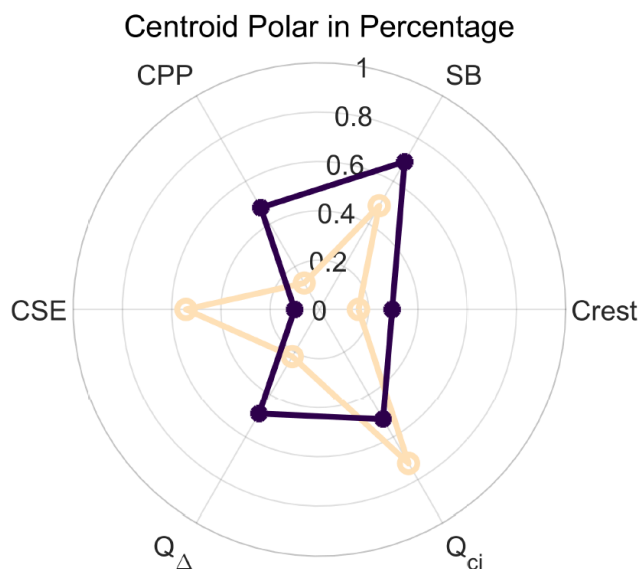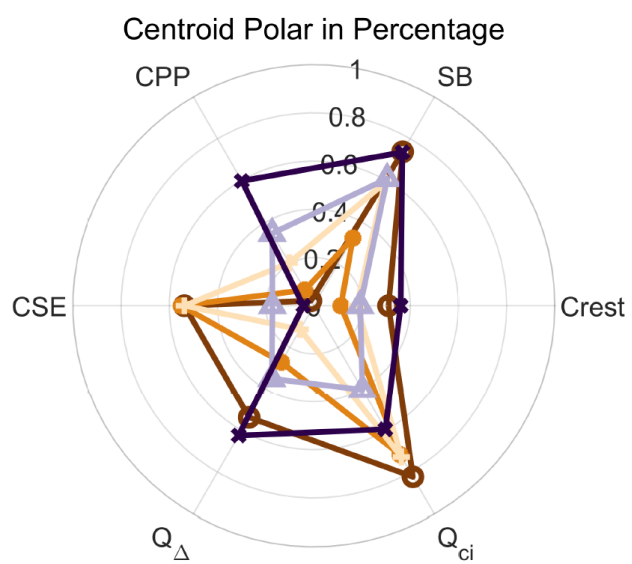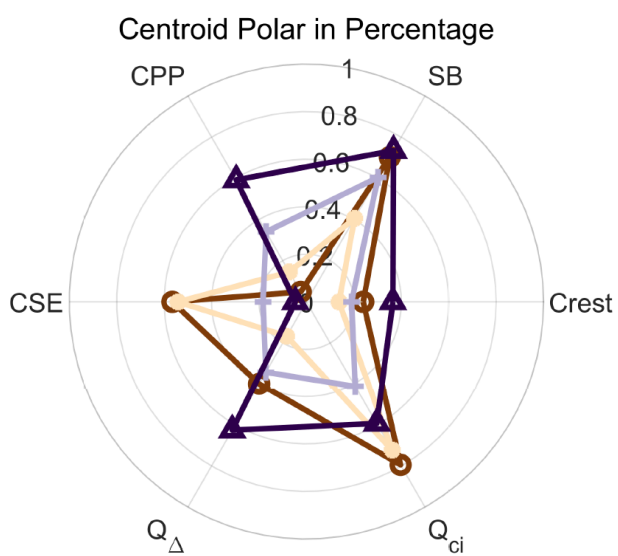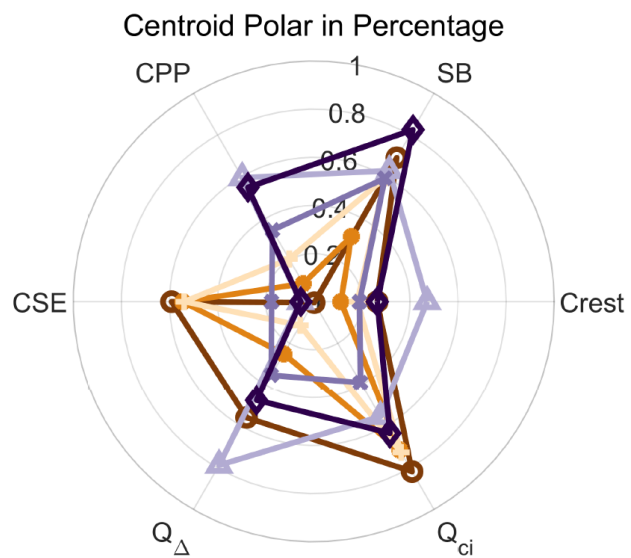

Figure S53: Classification voice maps for participant B01

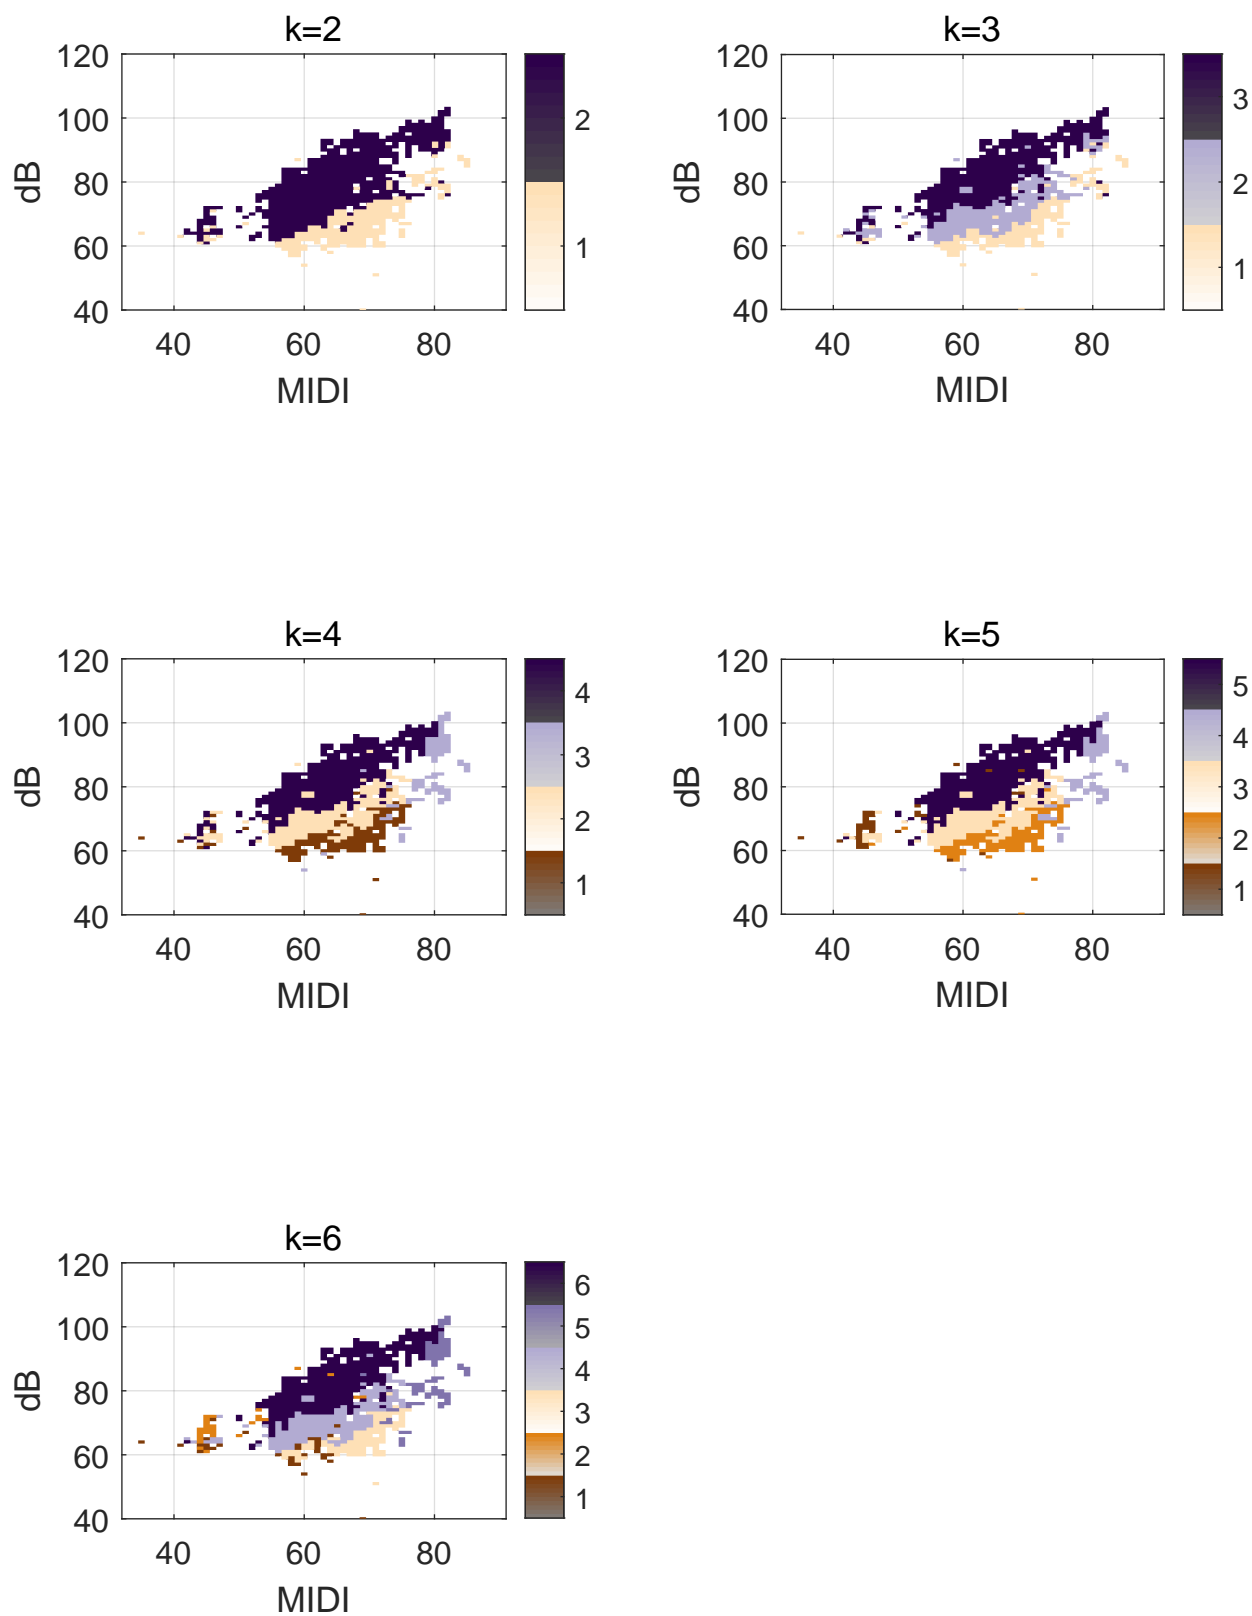

Figure S54: Acoustic and EGG Metric maps for participant B01

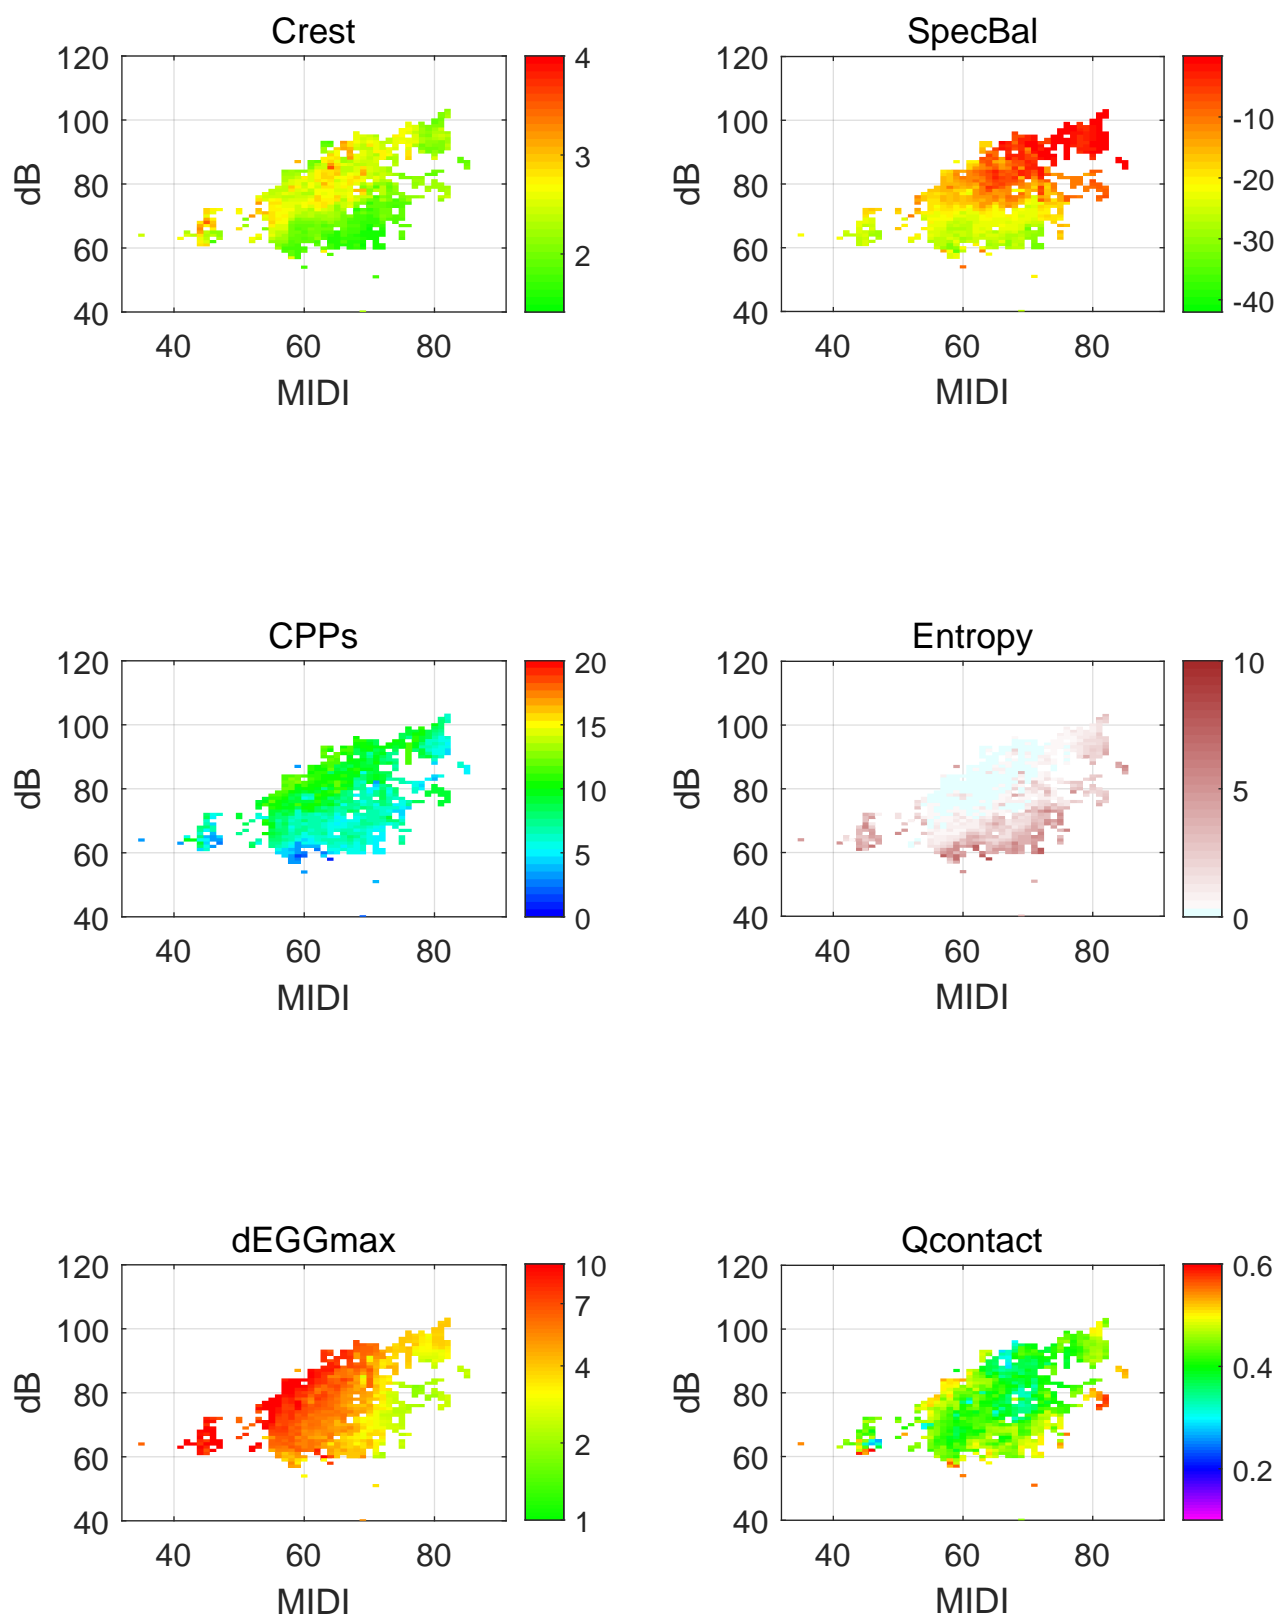

Figure S55: Classification voice maps for participant B02

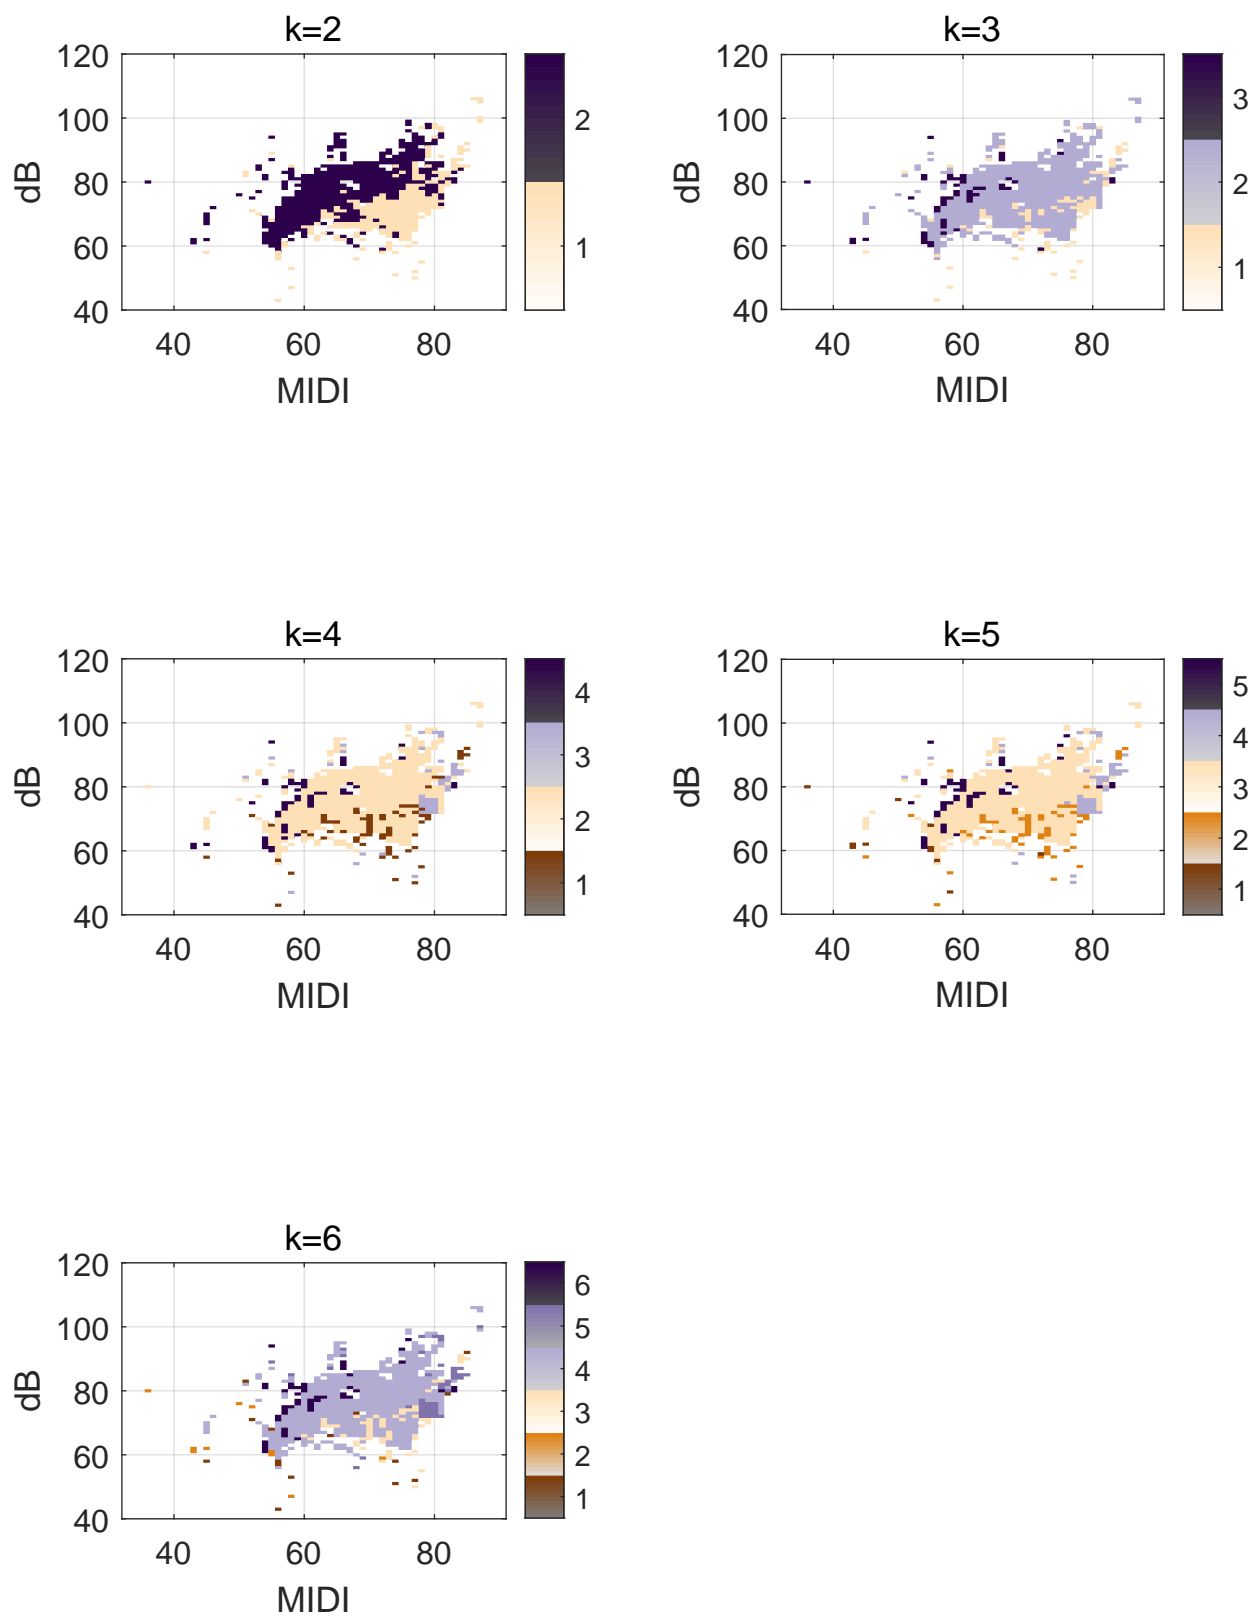

Figure S56: Acoustic and EGG Metric maps for participant B02

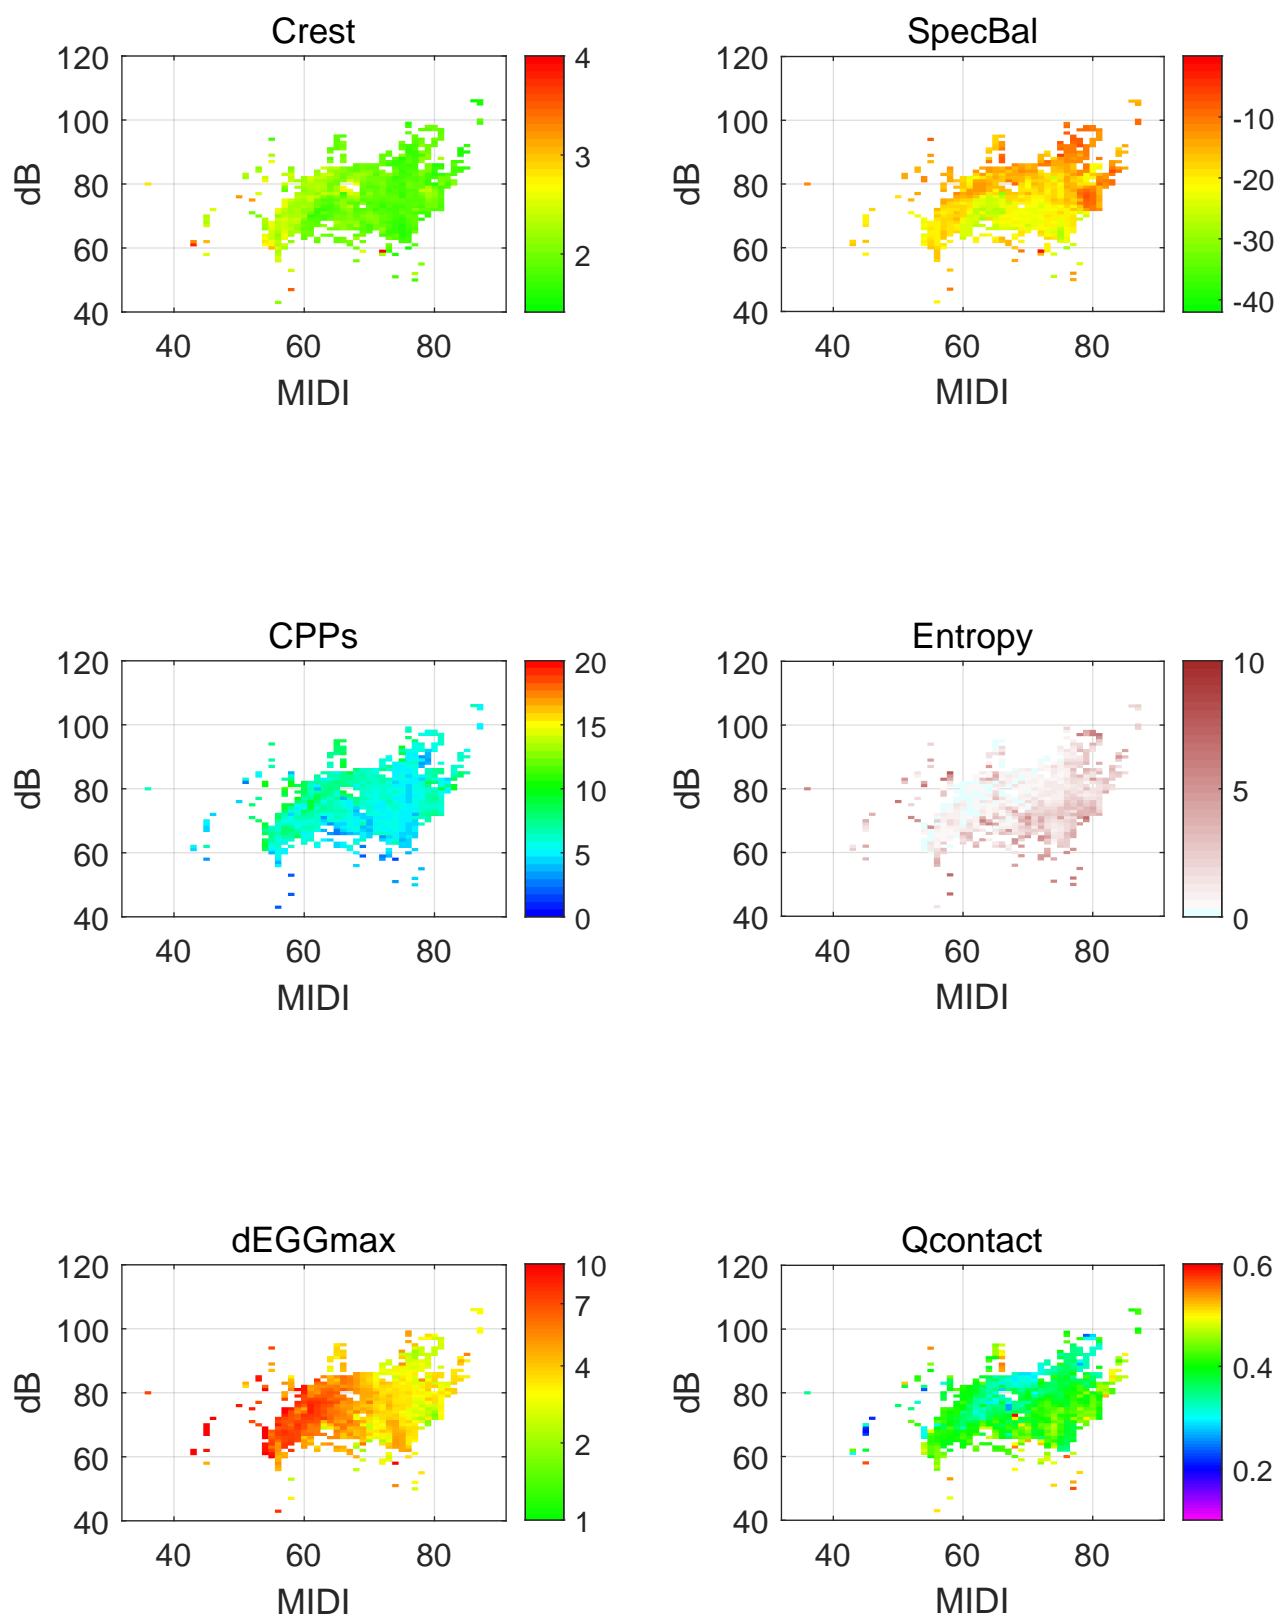

Figure S57: Classification voice maps for participant B03

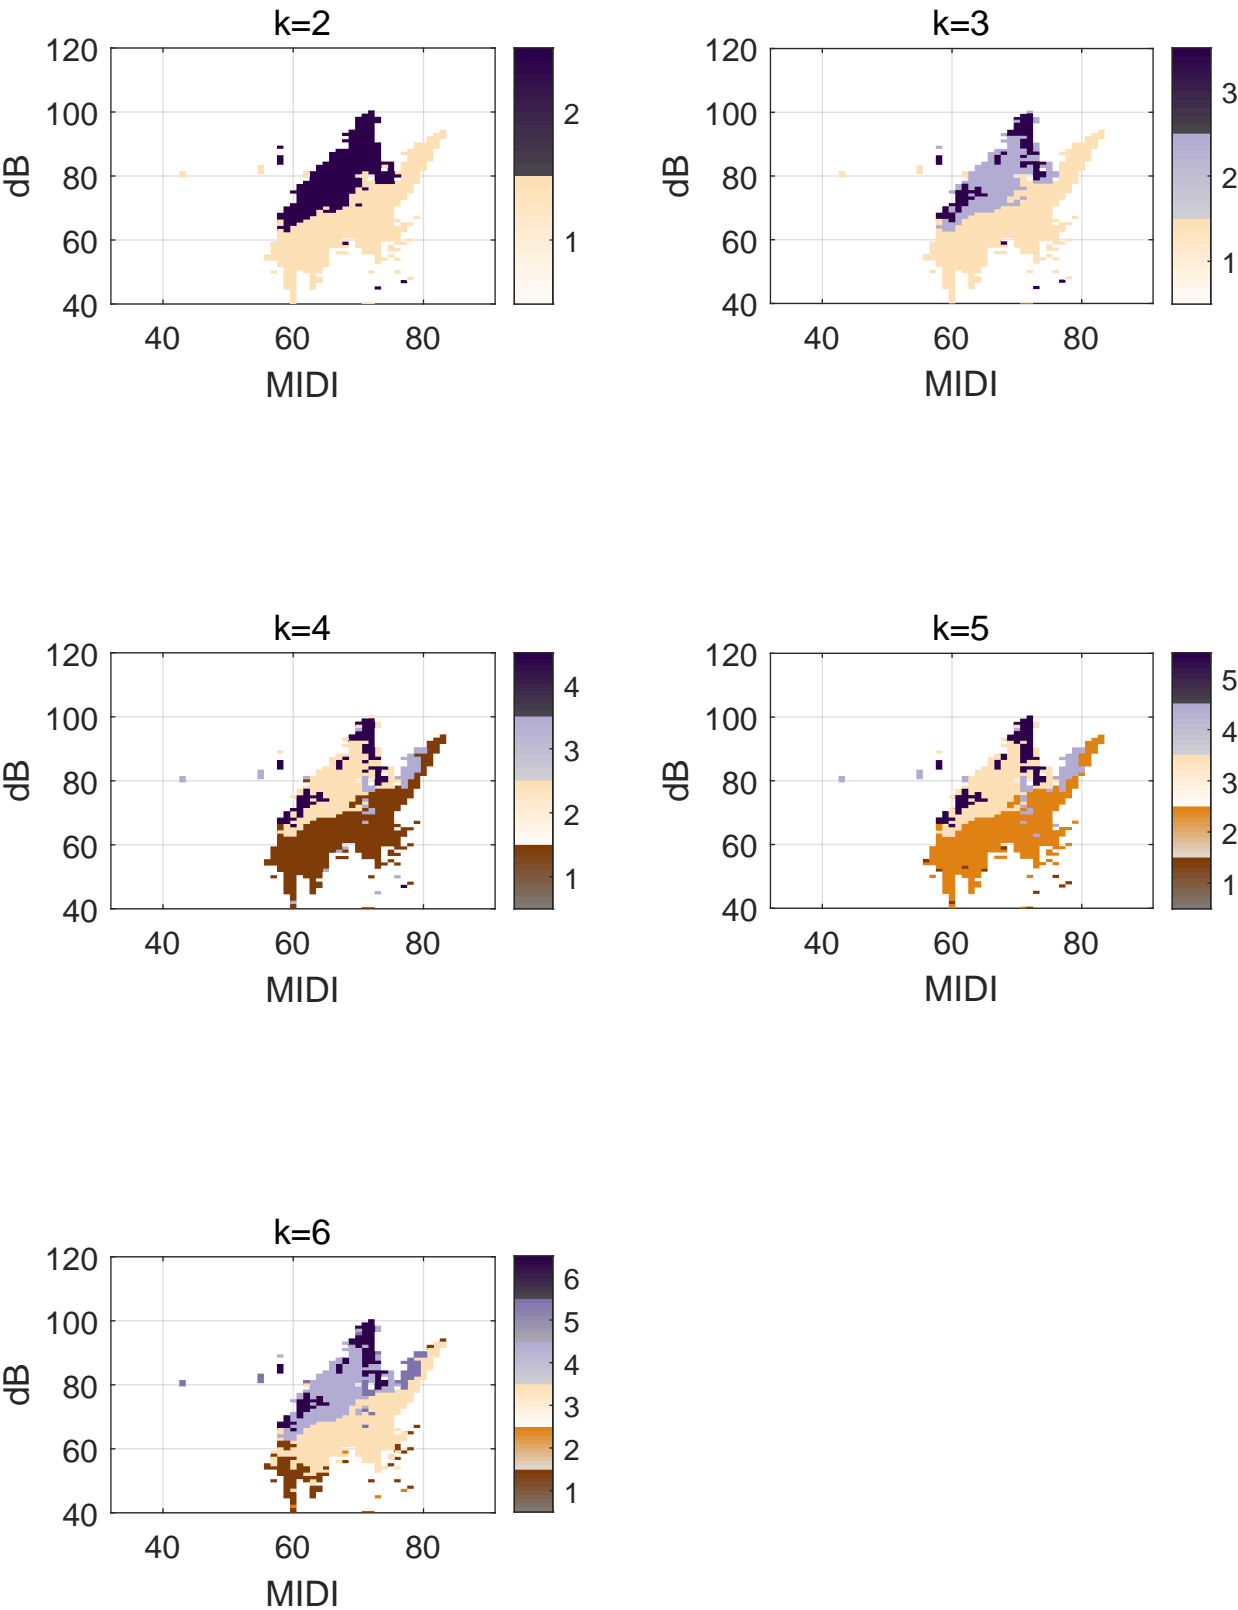

Figure S58: Acoustic and EGG Metric maps for participant B03

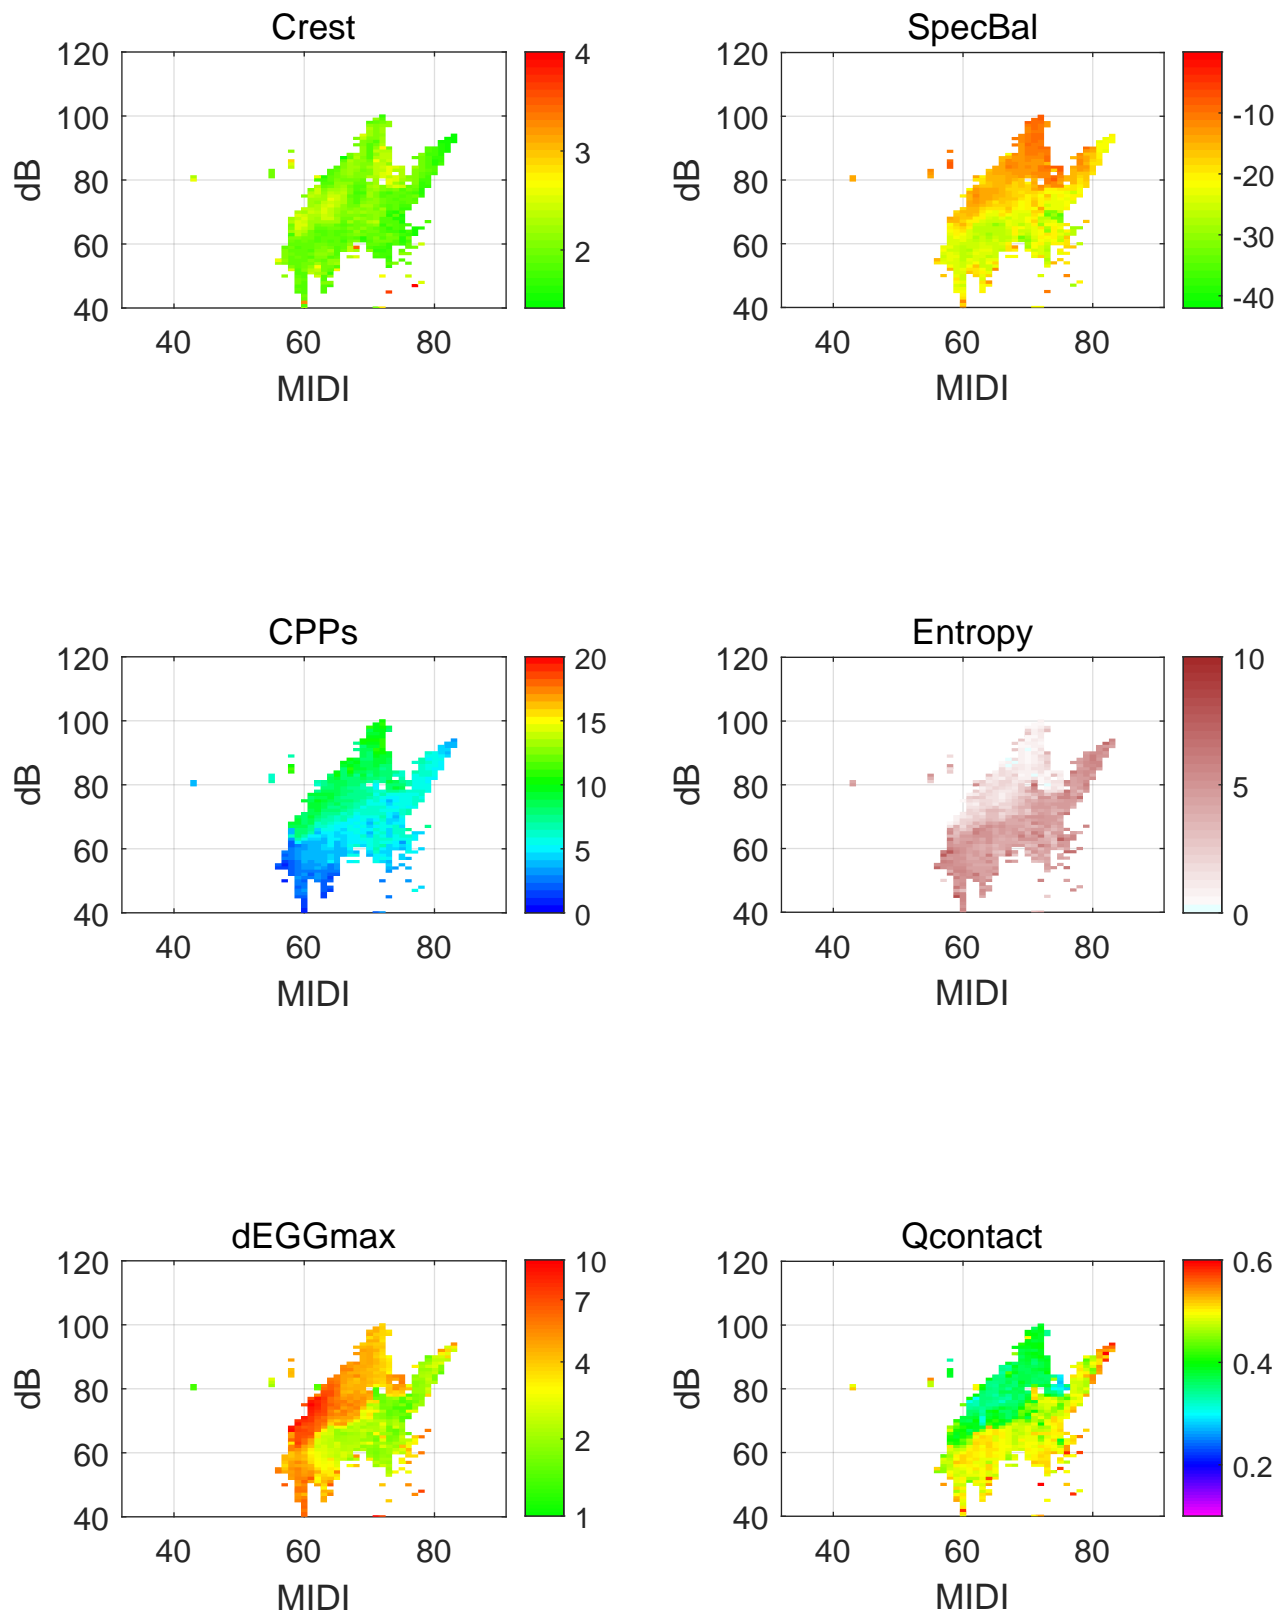

Figure S59: Classification voice maps for participant B04

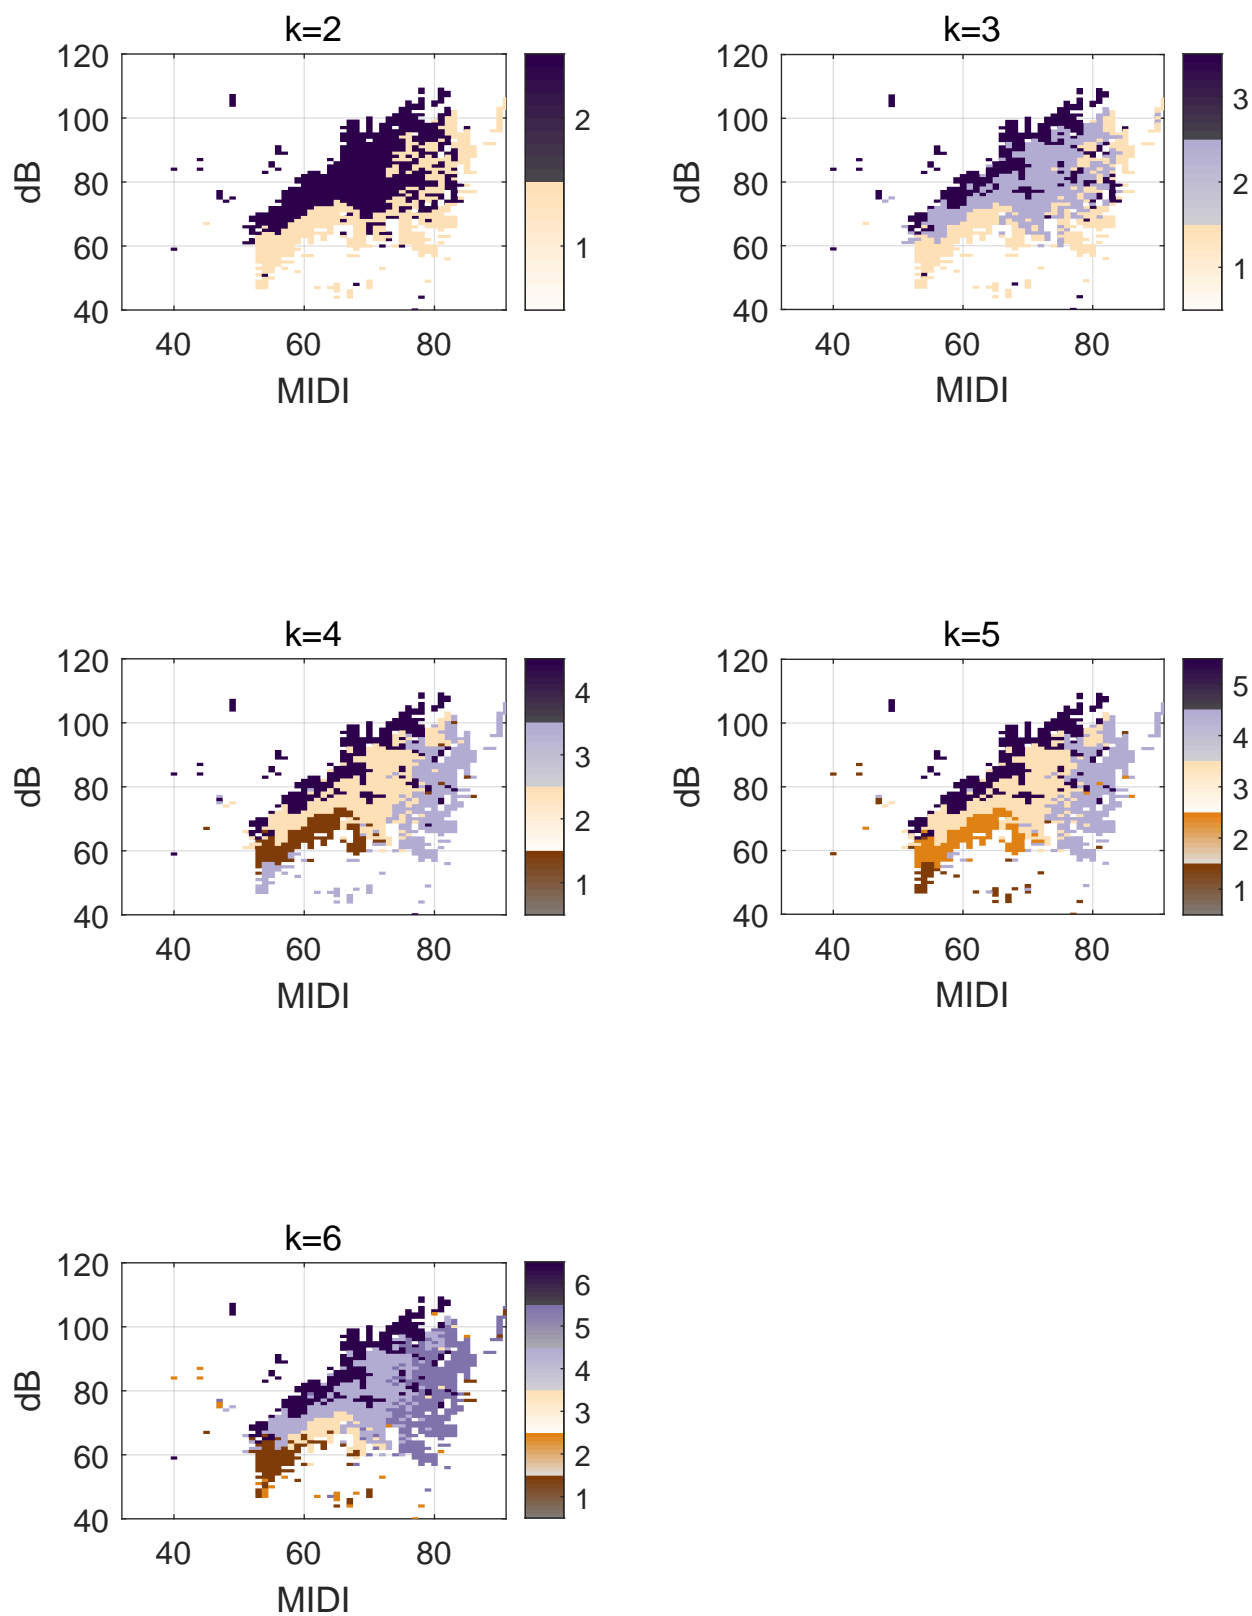



Figure S60: Acoustic and EGG Metric maps for participant B04

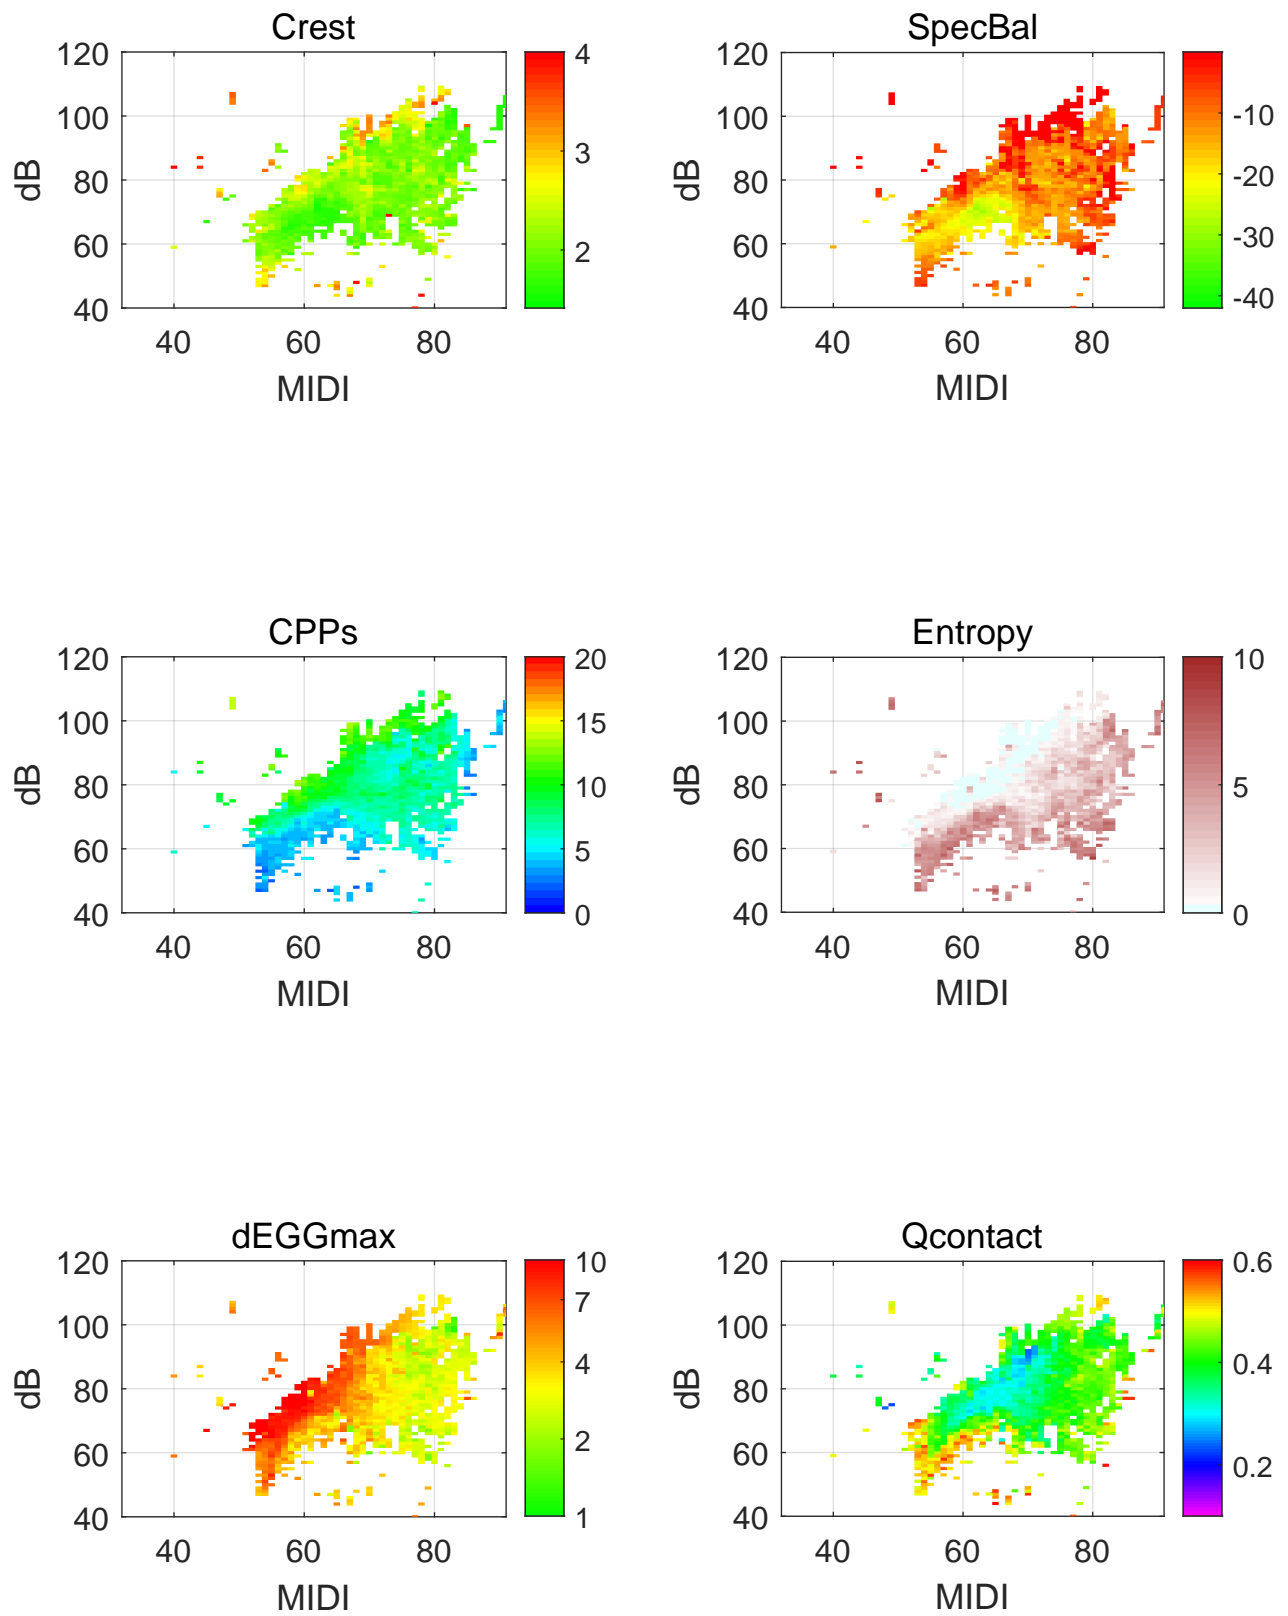

Figure S61: Classification voice maps for participant B05

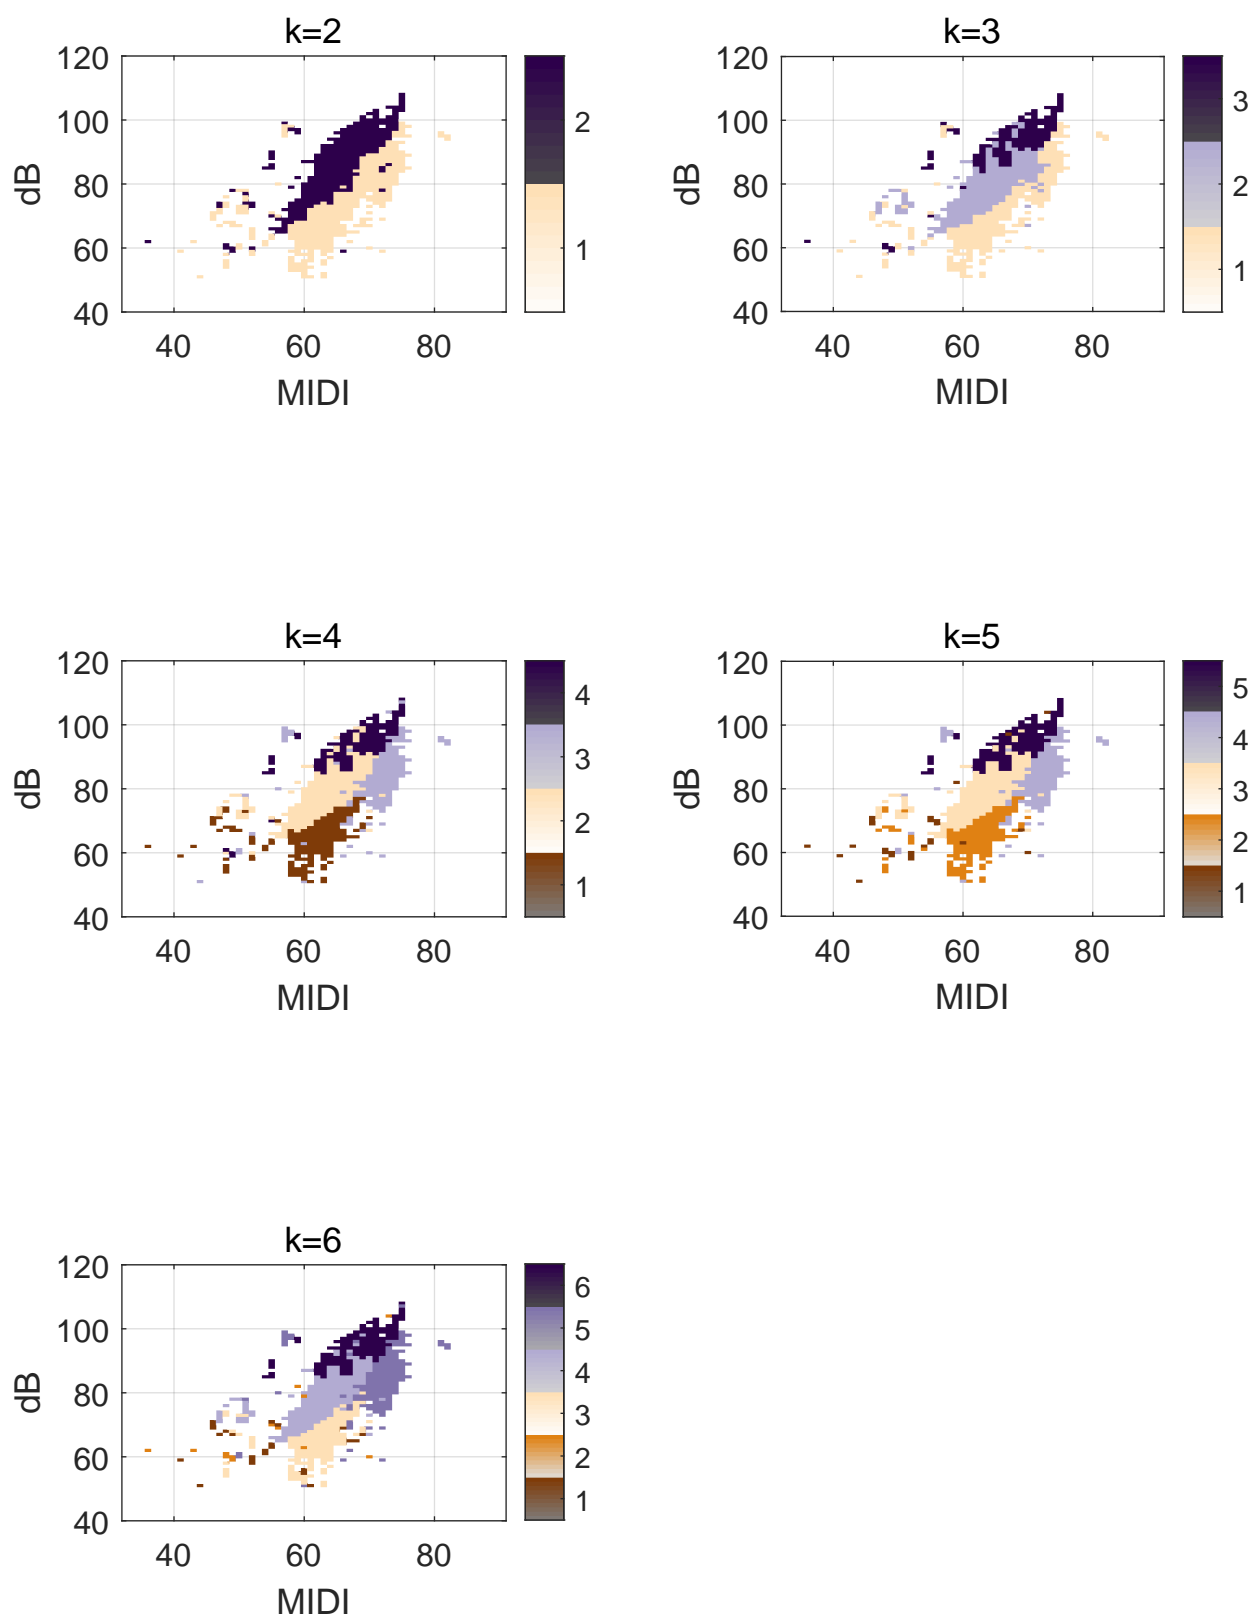

Figure S62: Acoustic and EGG Metric maps for participant B05

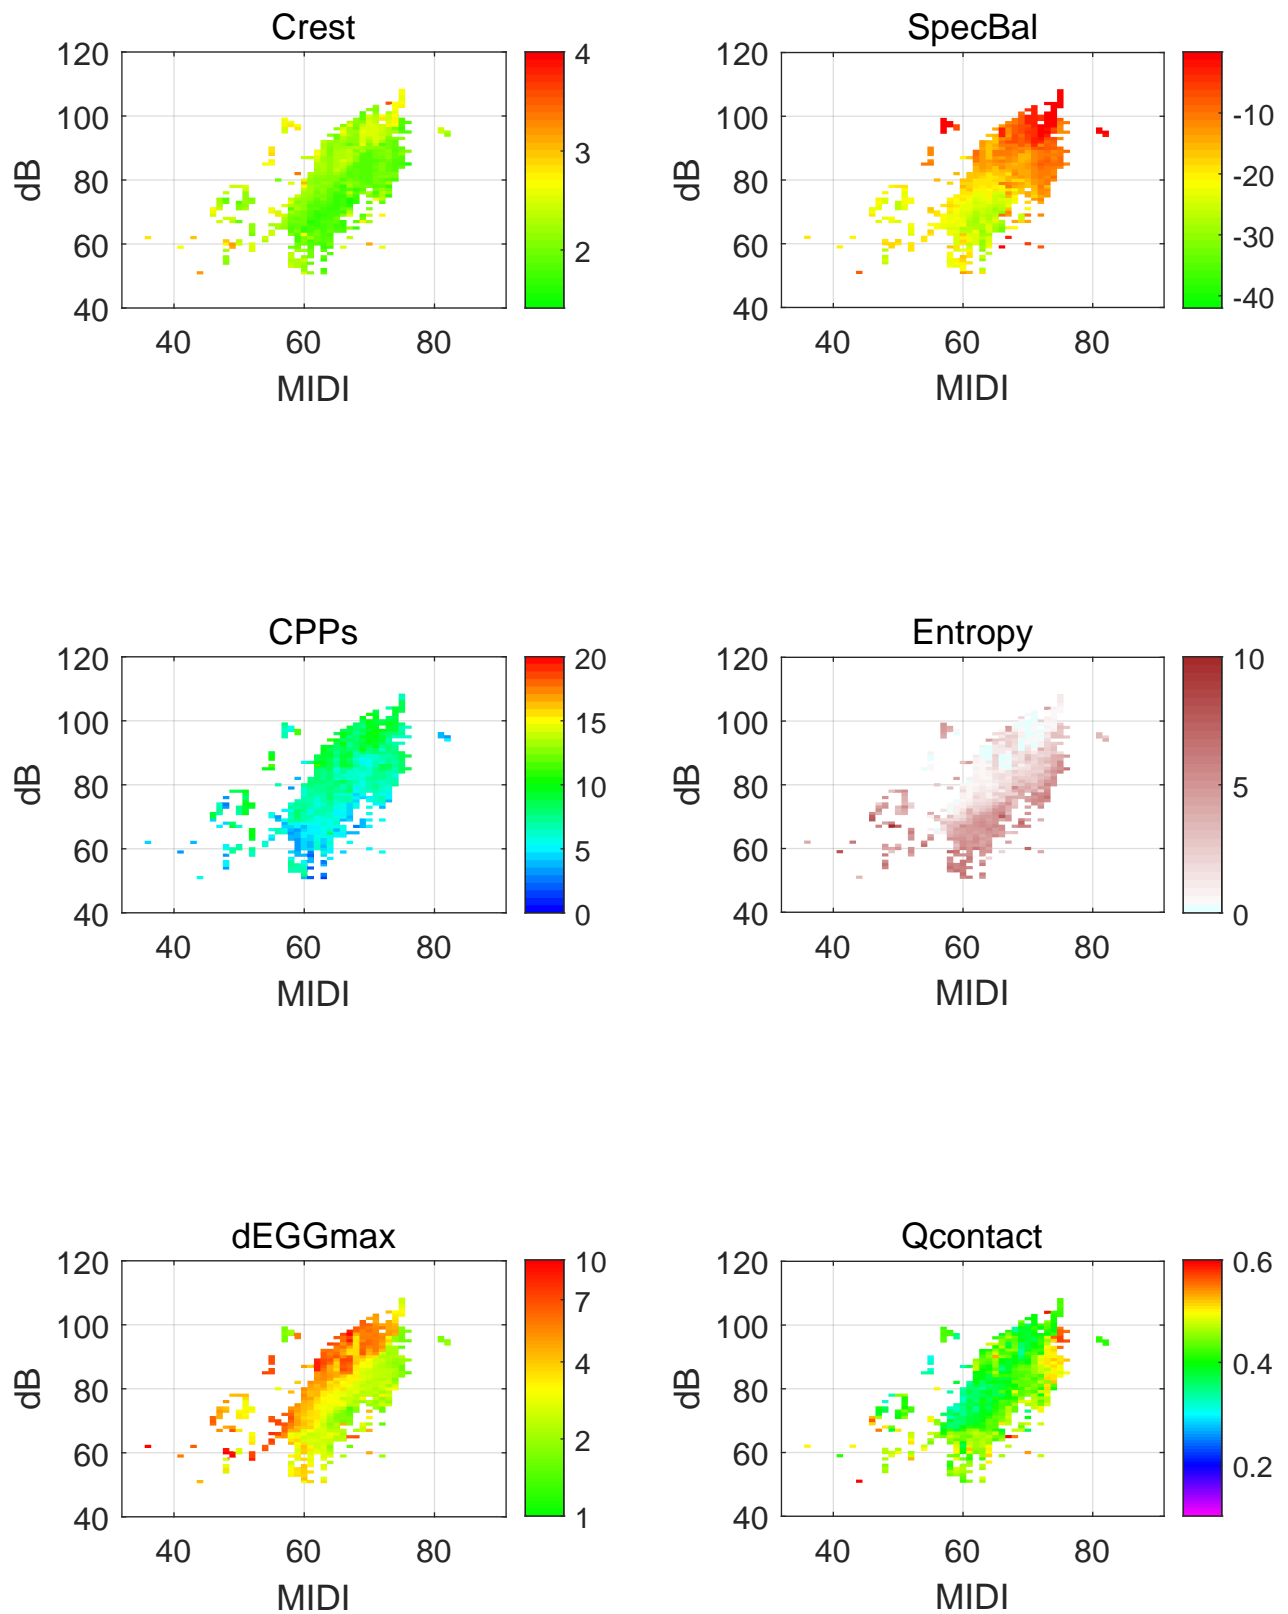

Figure S63: Classification voice maps for participant B06

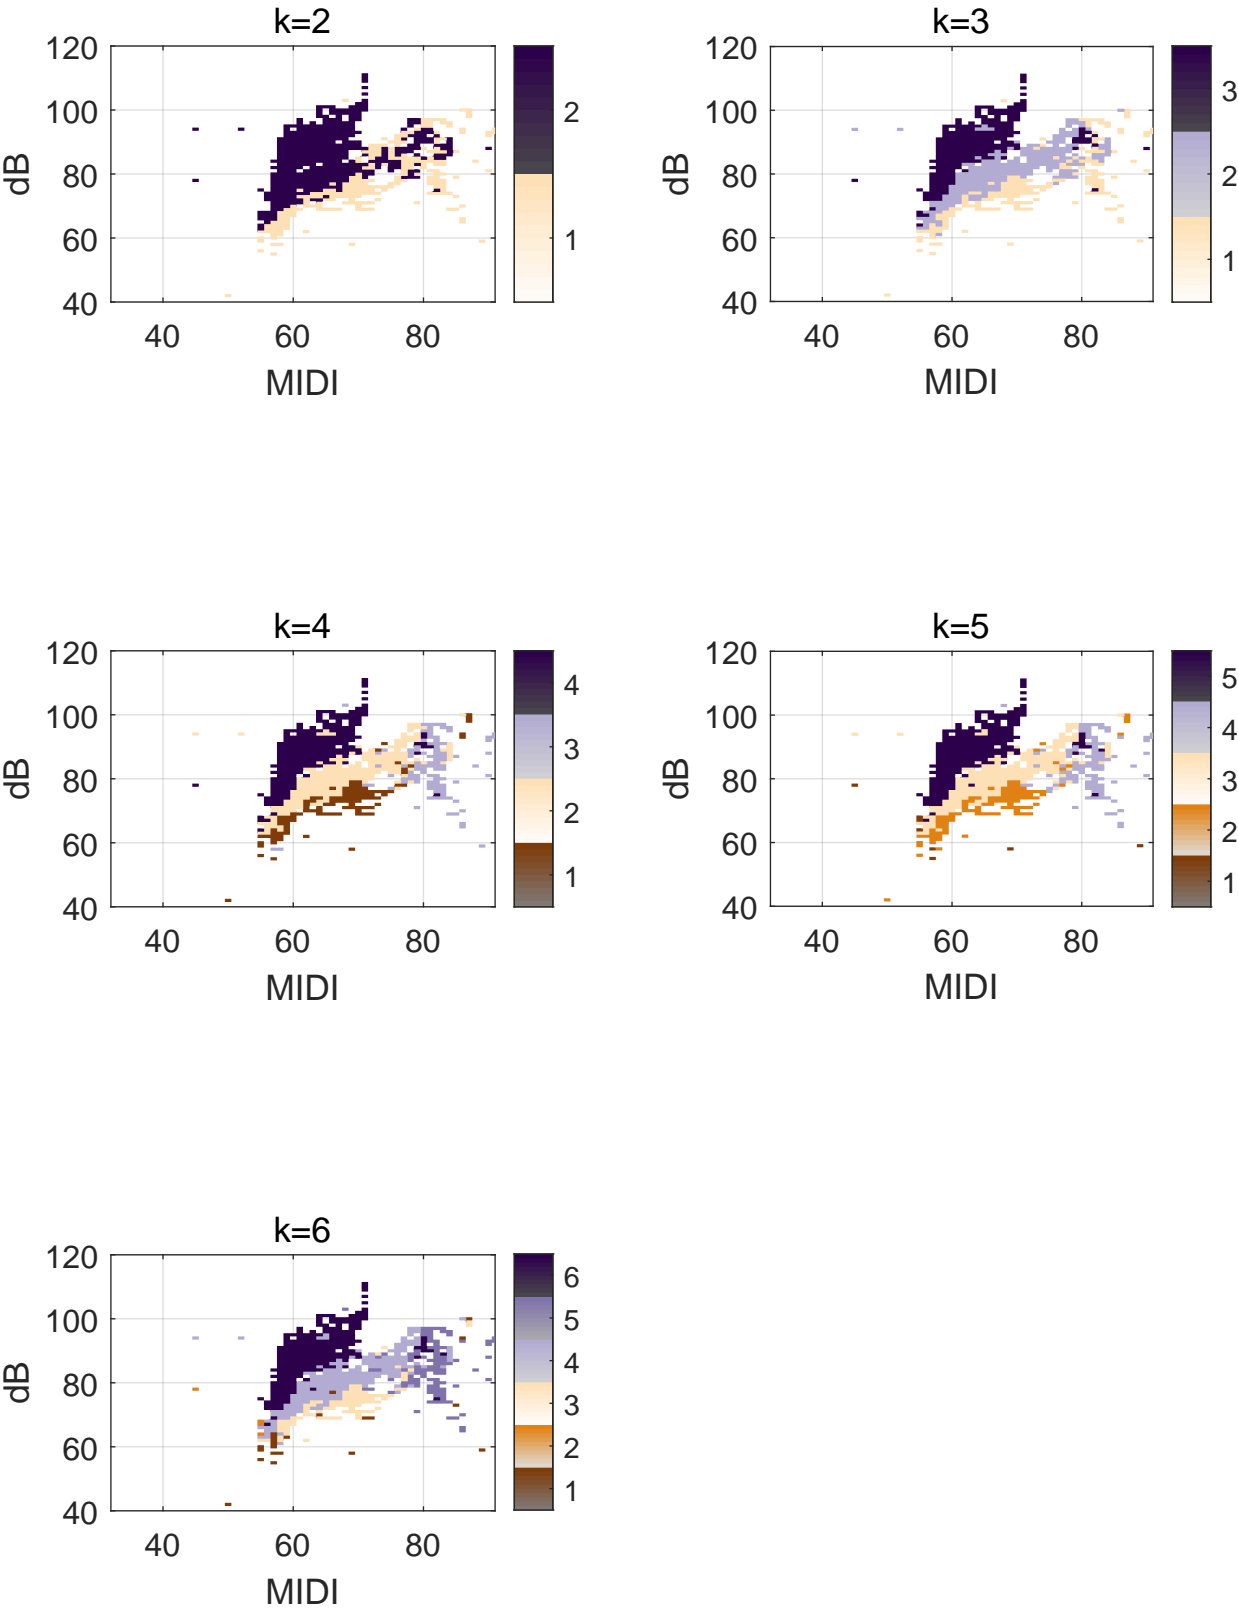

Figure S64: Acoustic and EGG Metric maps for participant B06

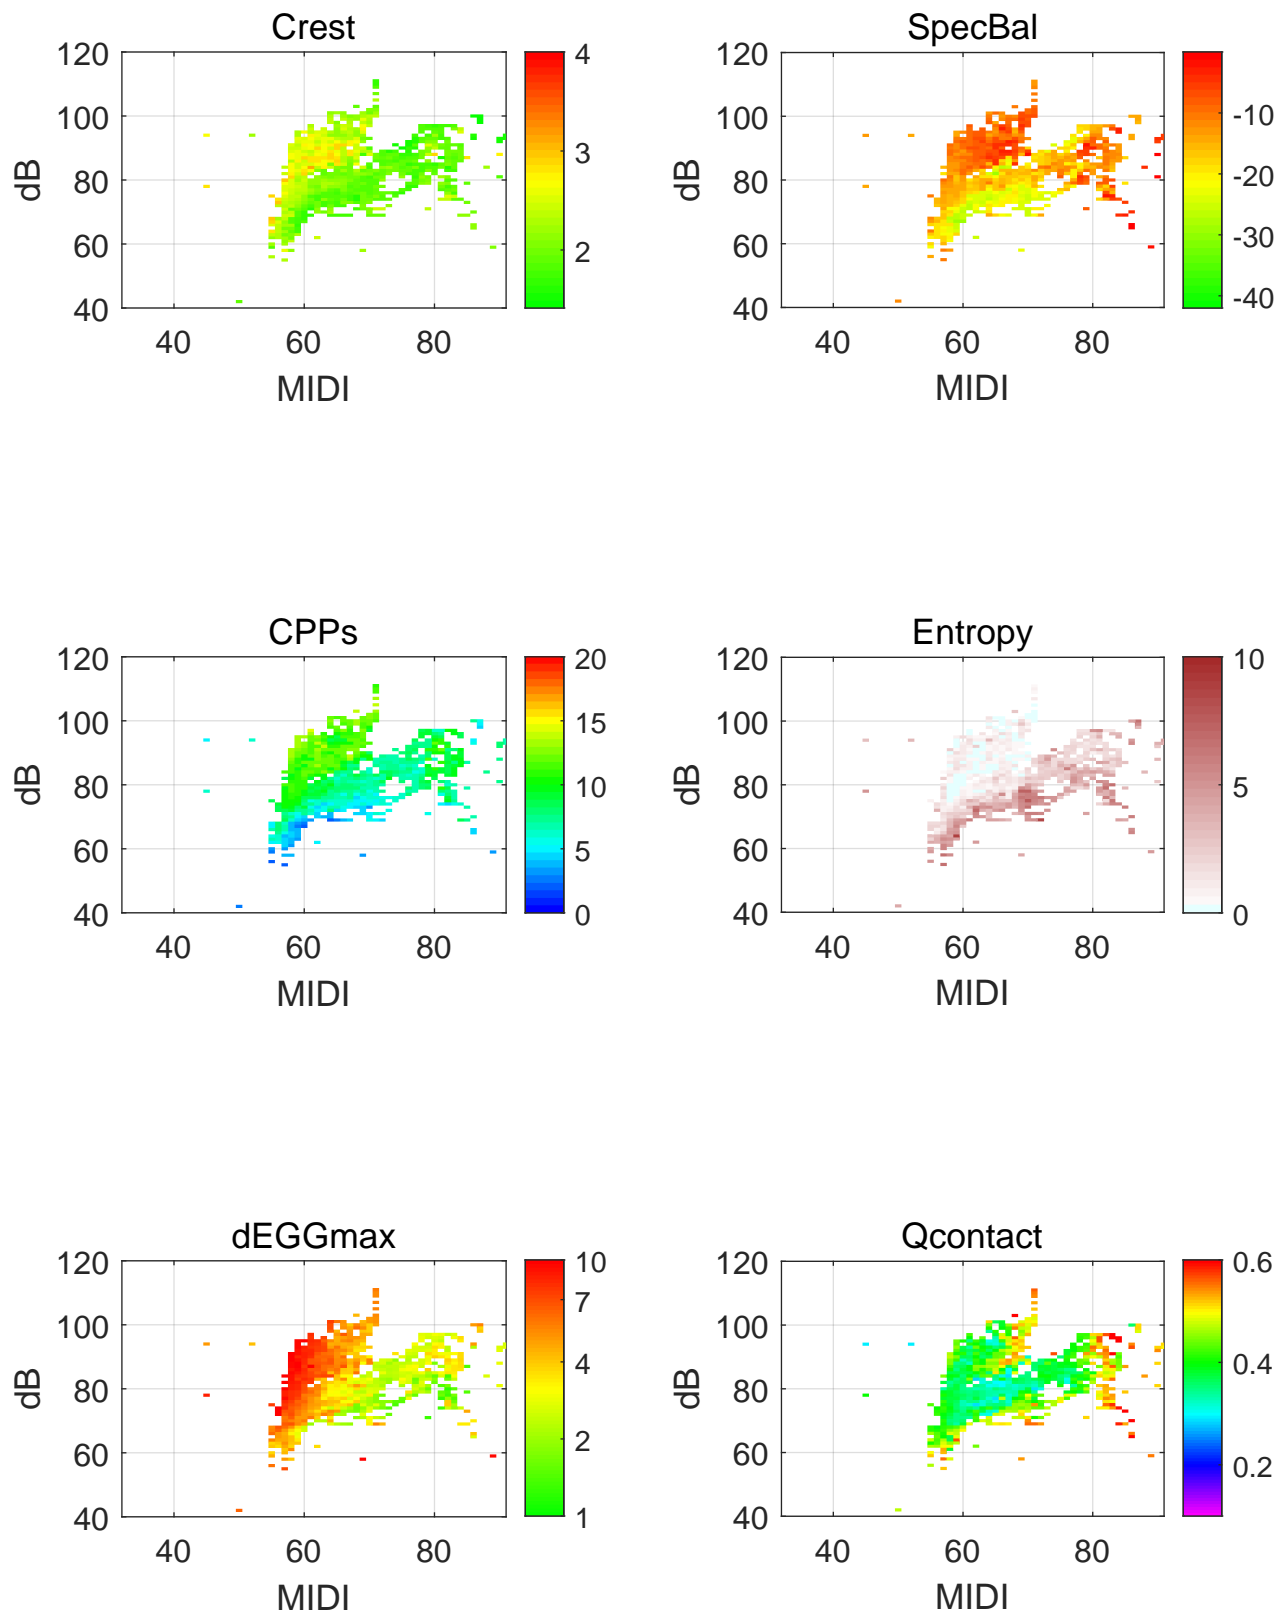

Figure S65: Classification voice maps for participant B07

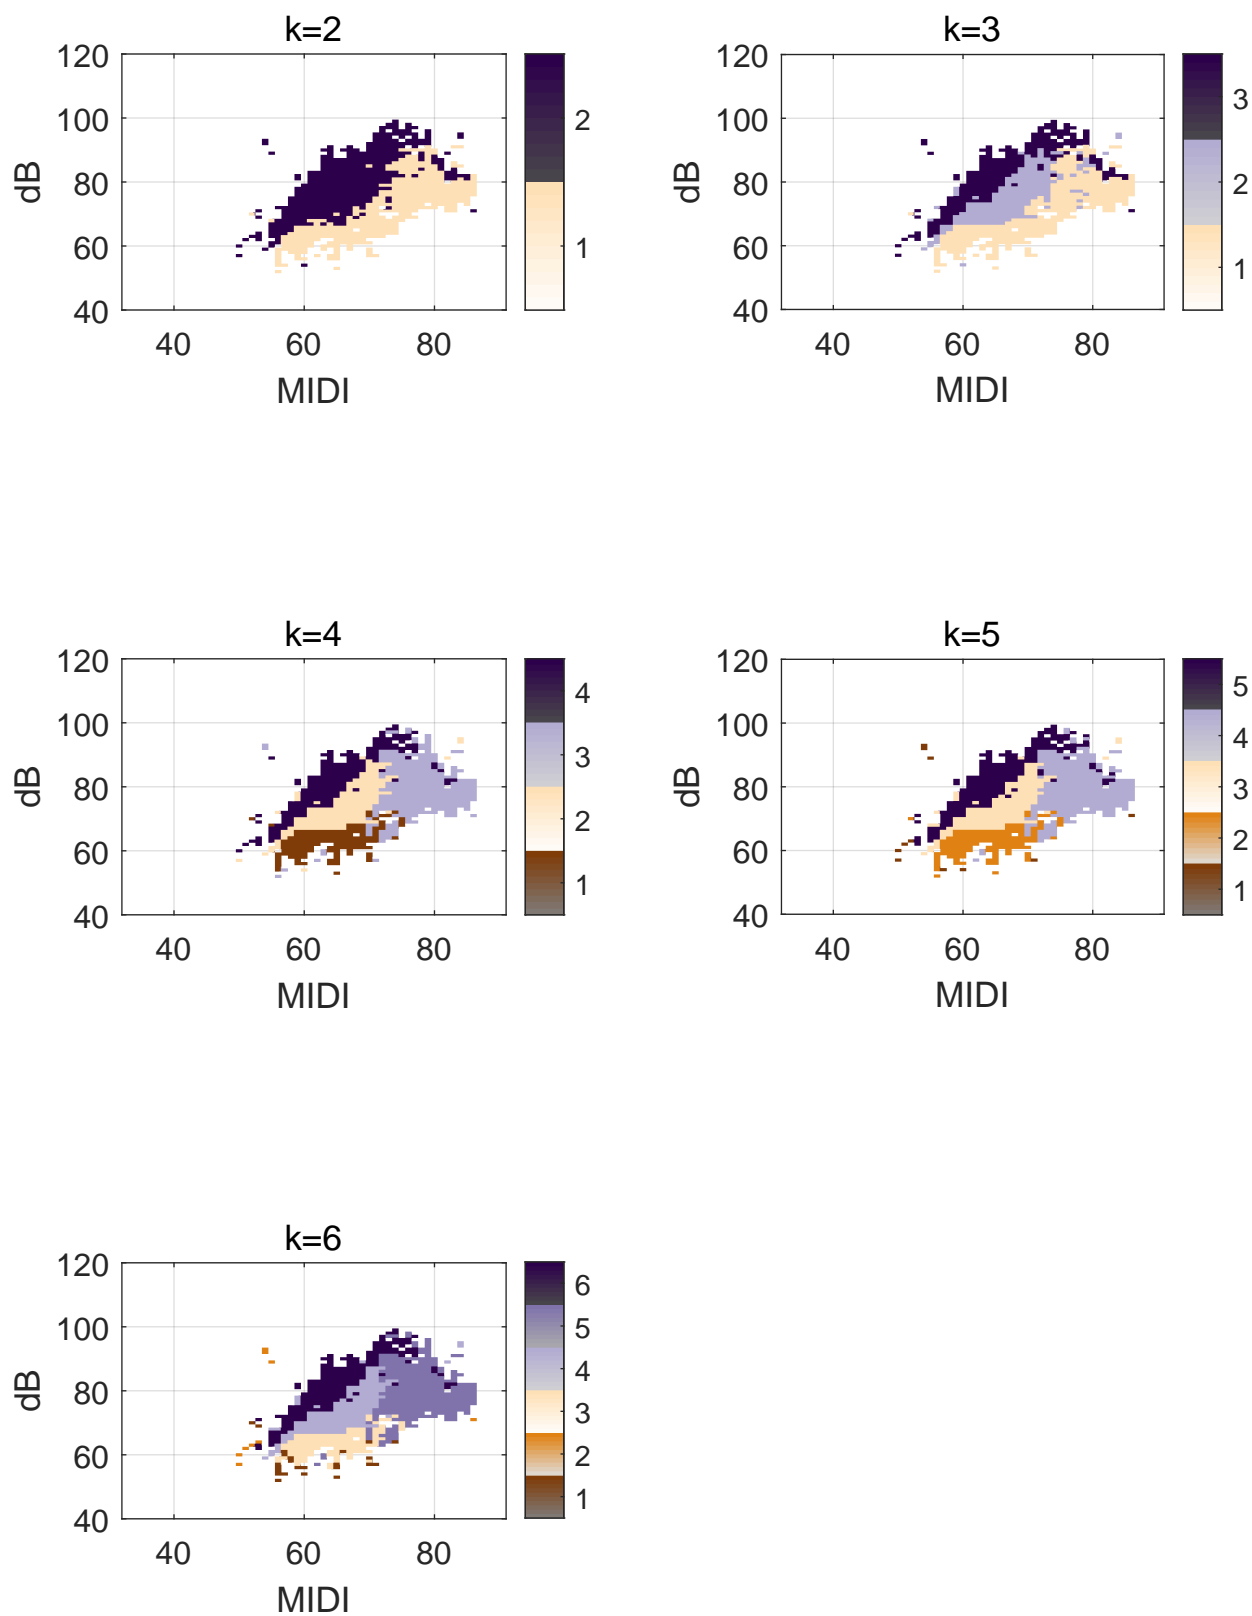

Figure S66: Acoustic and EGG Metric maps for participant B07

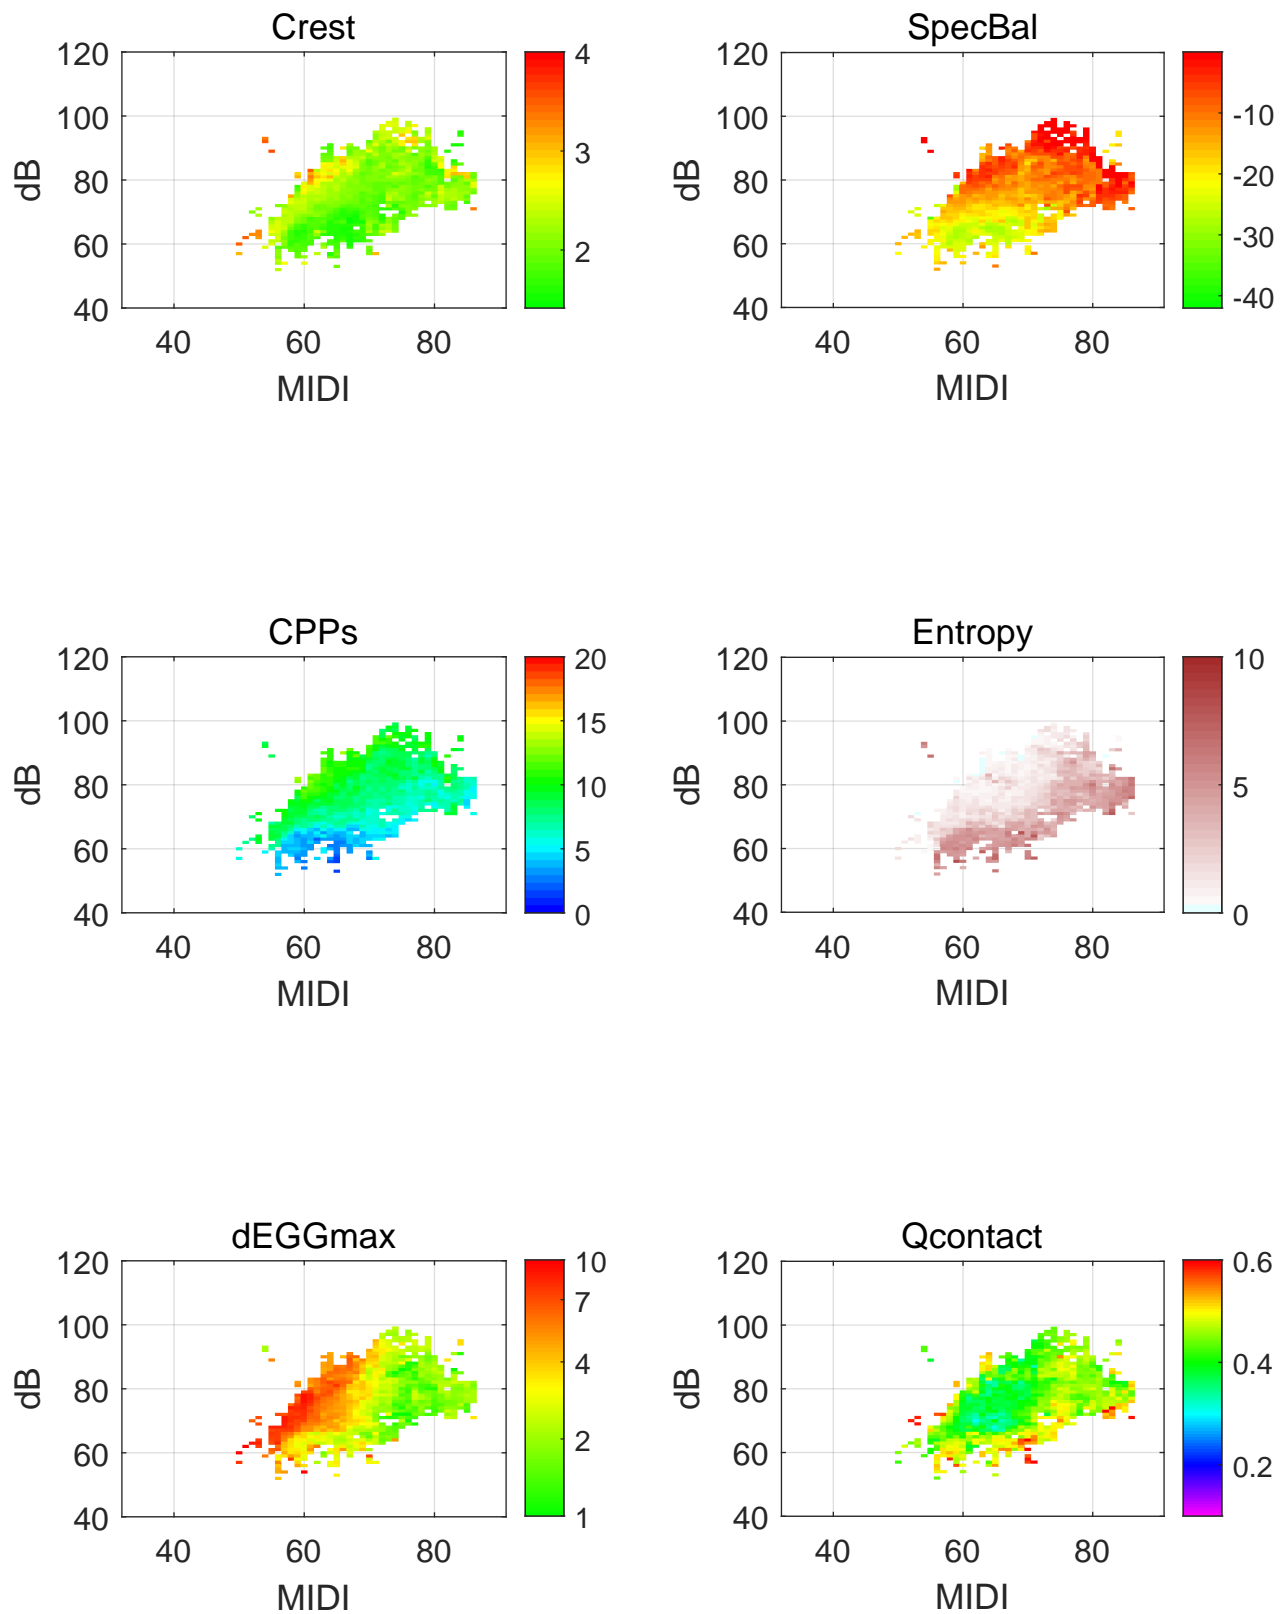

Figure S67: Classification voice maps for participant B08

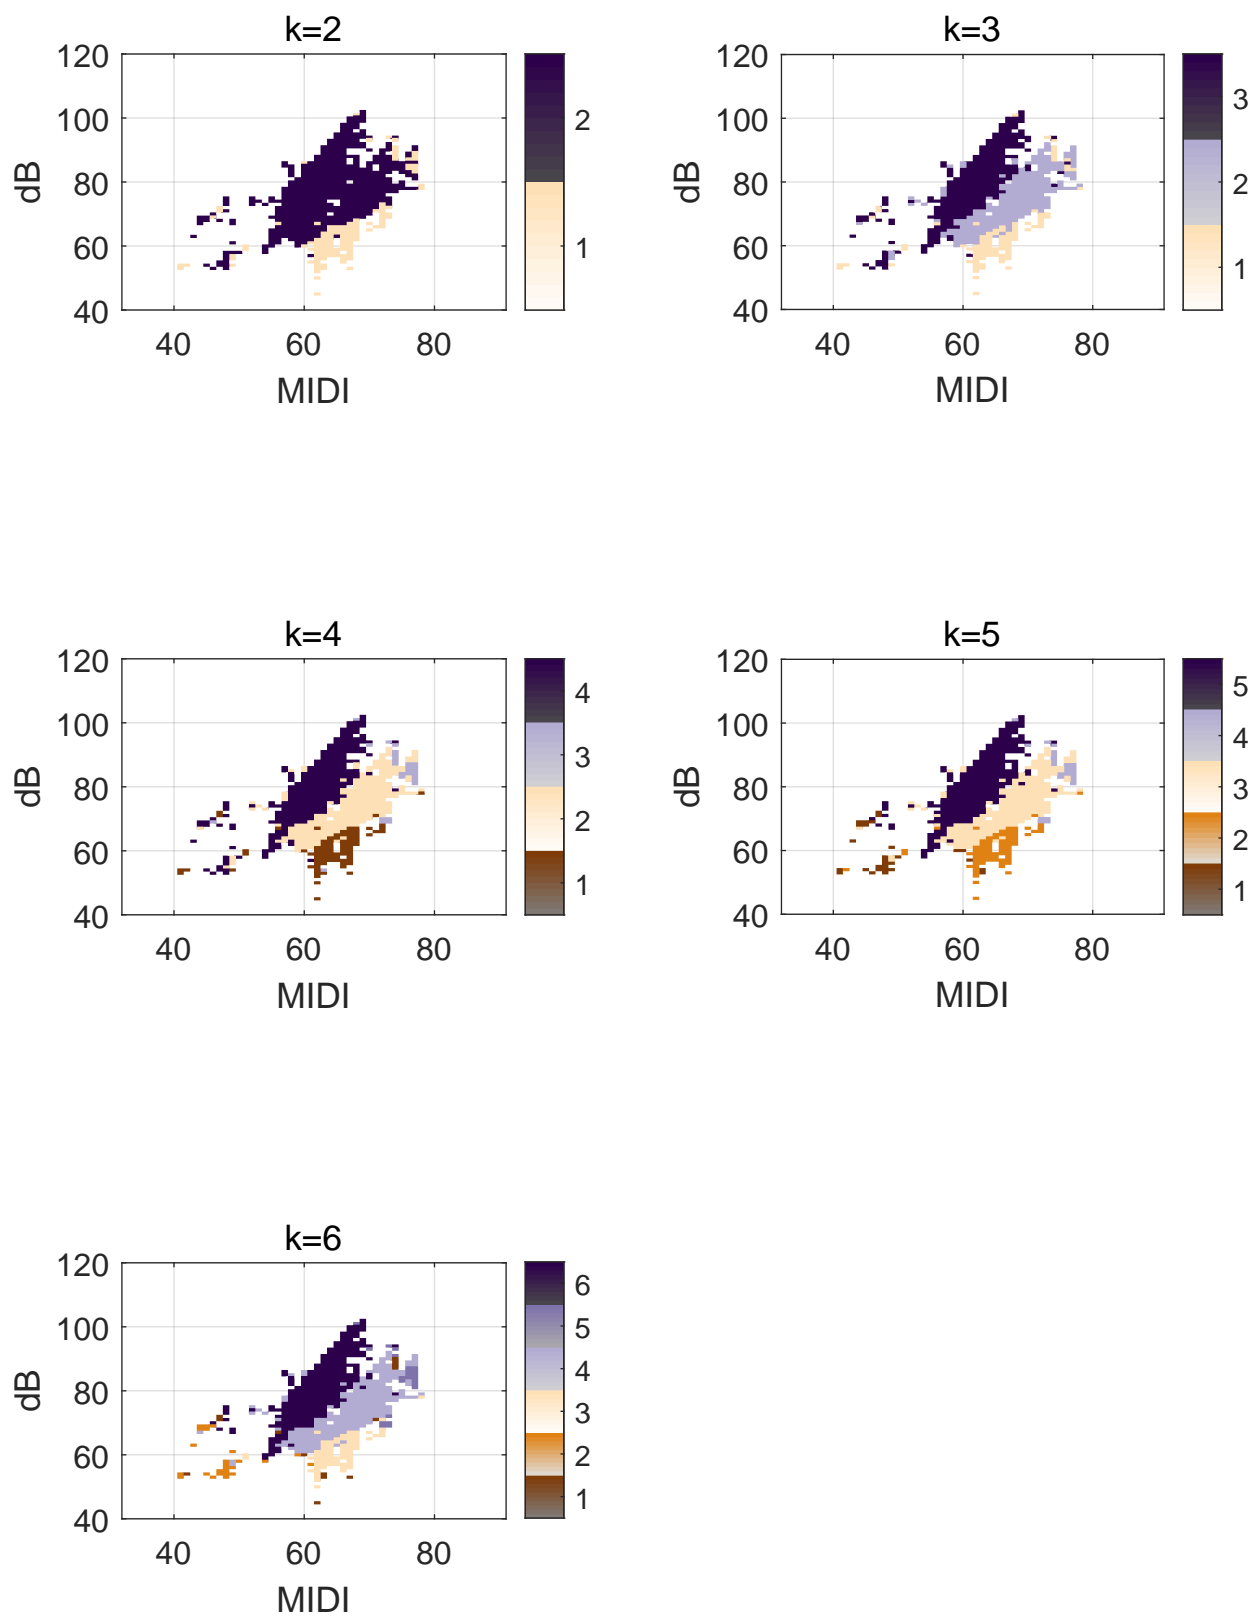



Figure S68: Acoustic and EGG Metric maps for participant B08

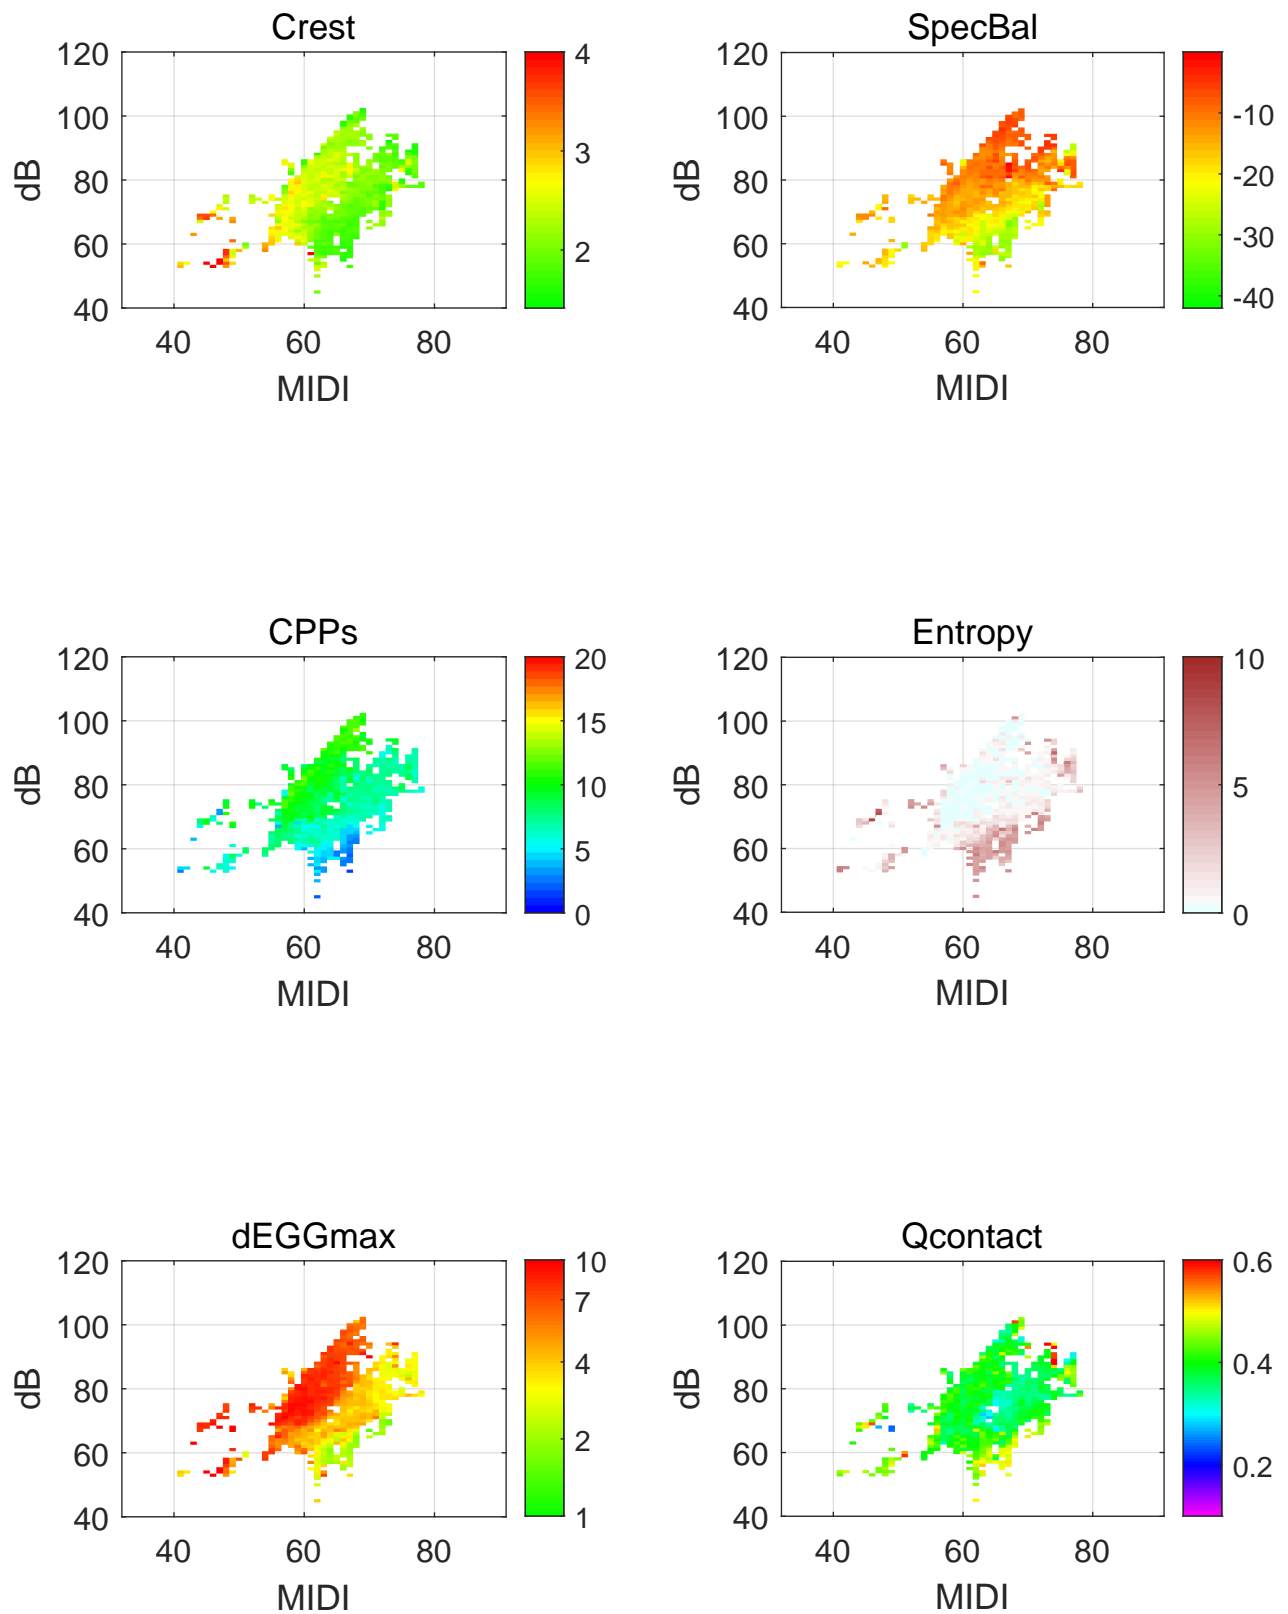

Figure S69: Classification voice maps for participant B09

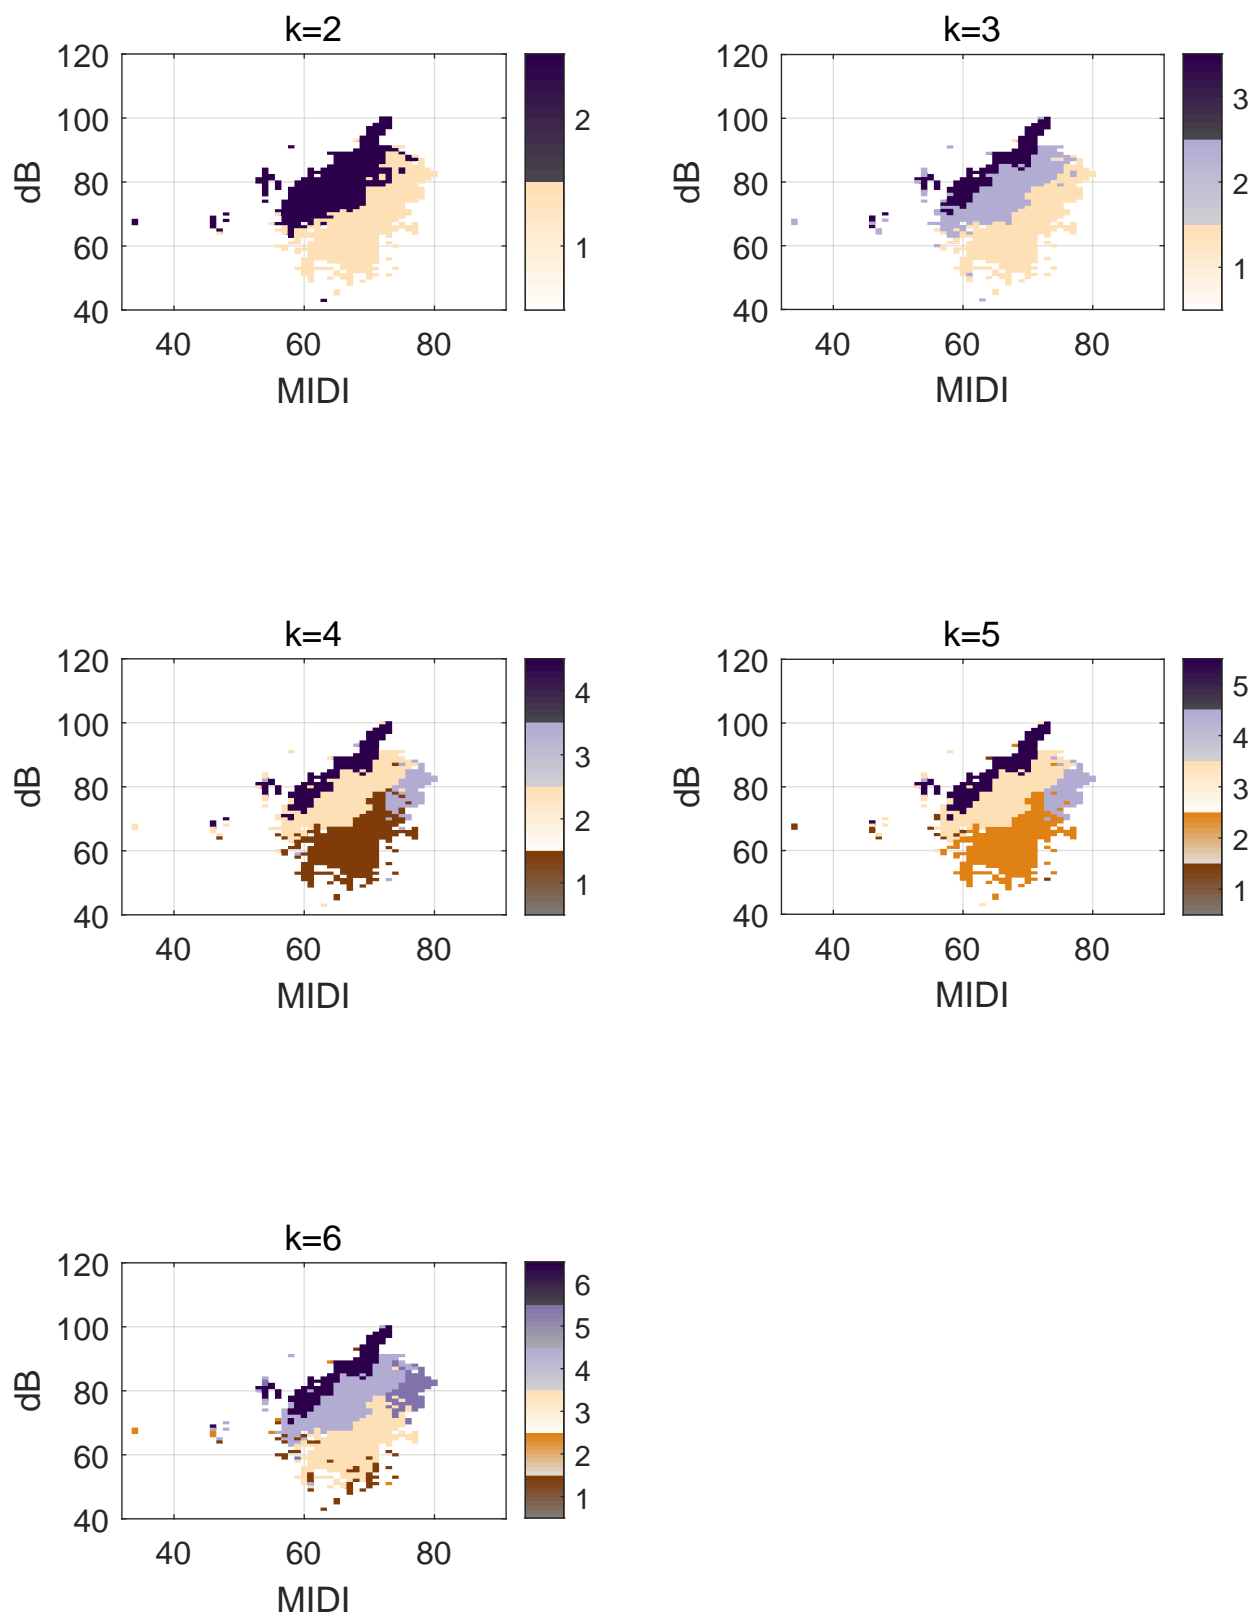

Figure S70: Acoustic and EGG Metric maps for participant B09

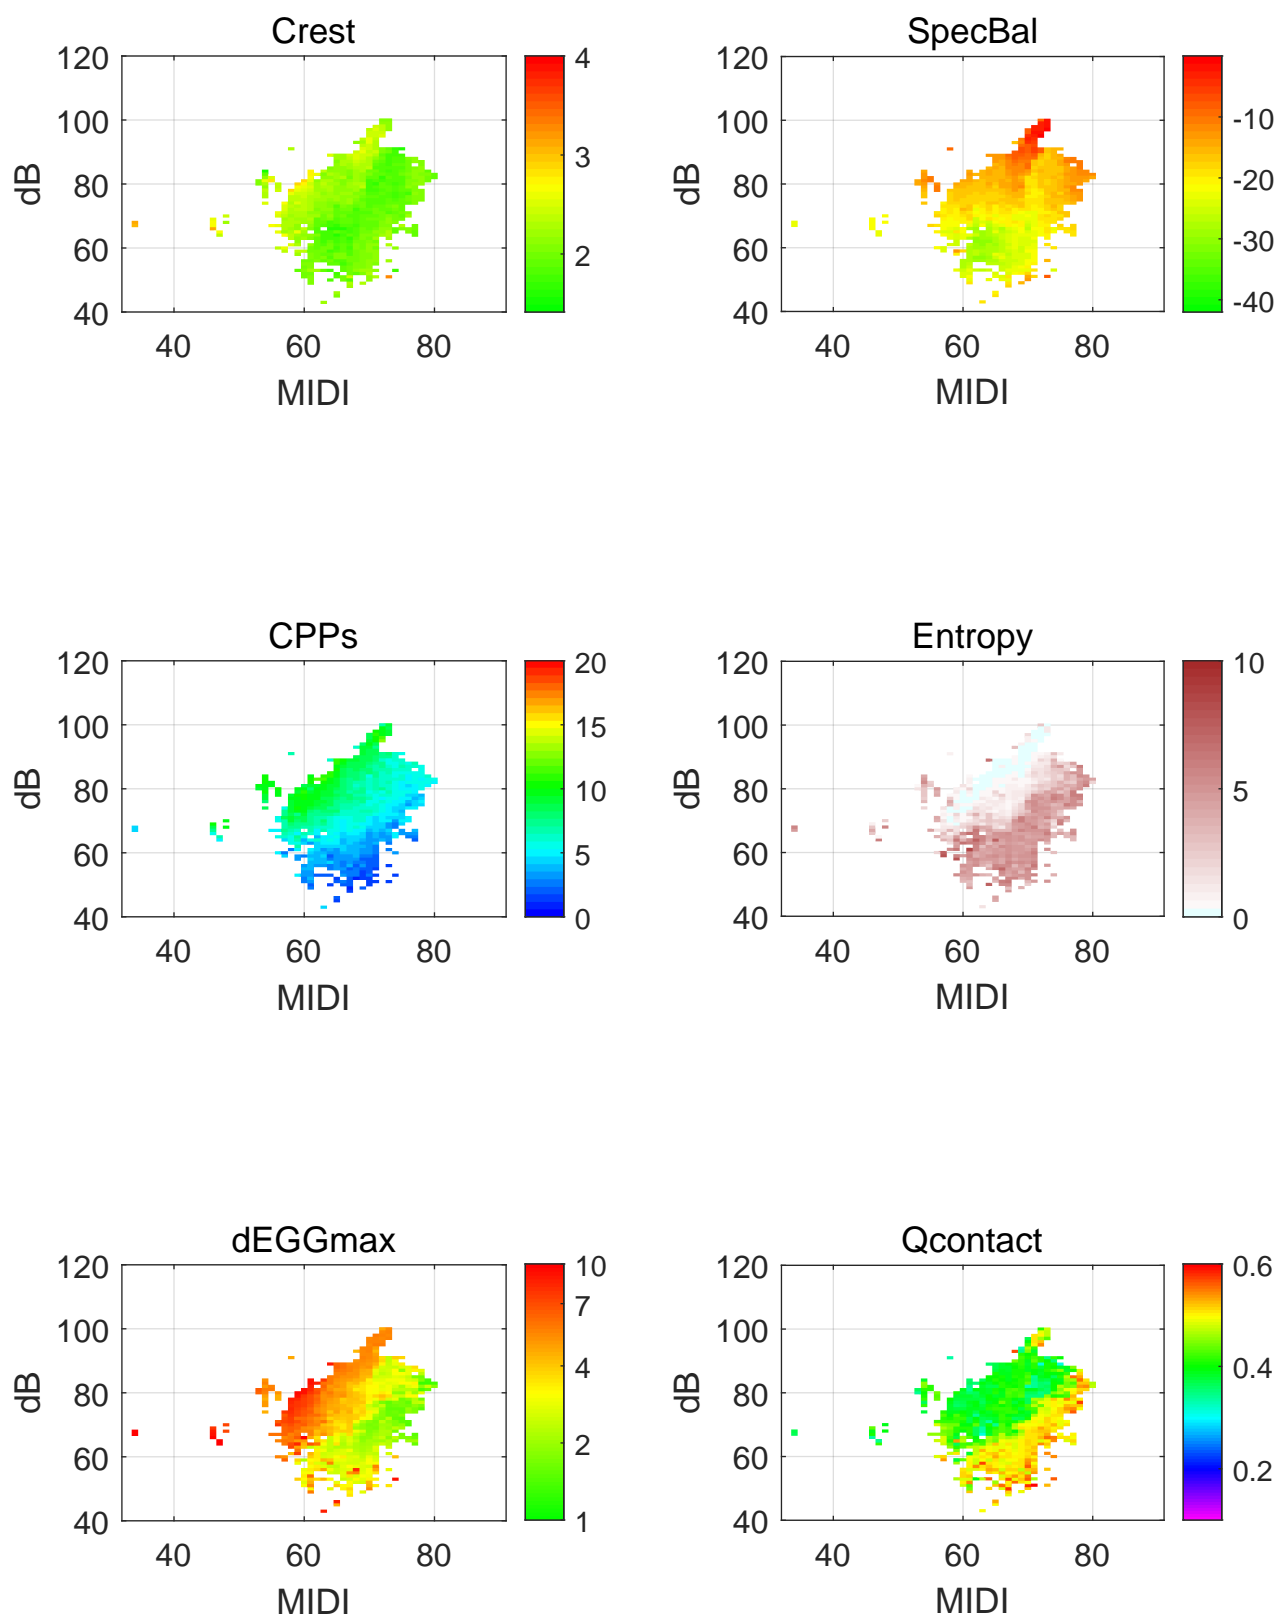

Figure S71: Classification voice maps for participant G02

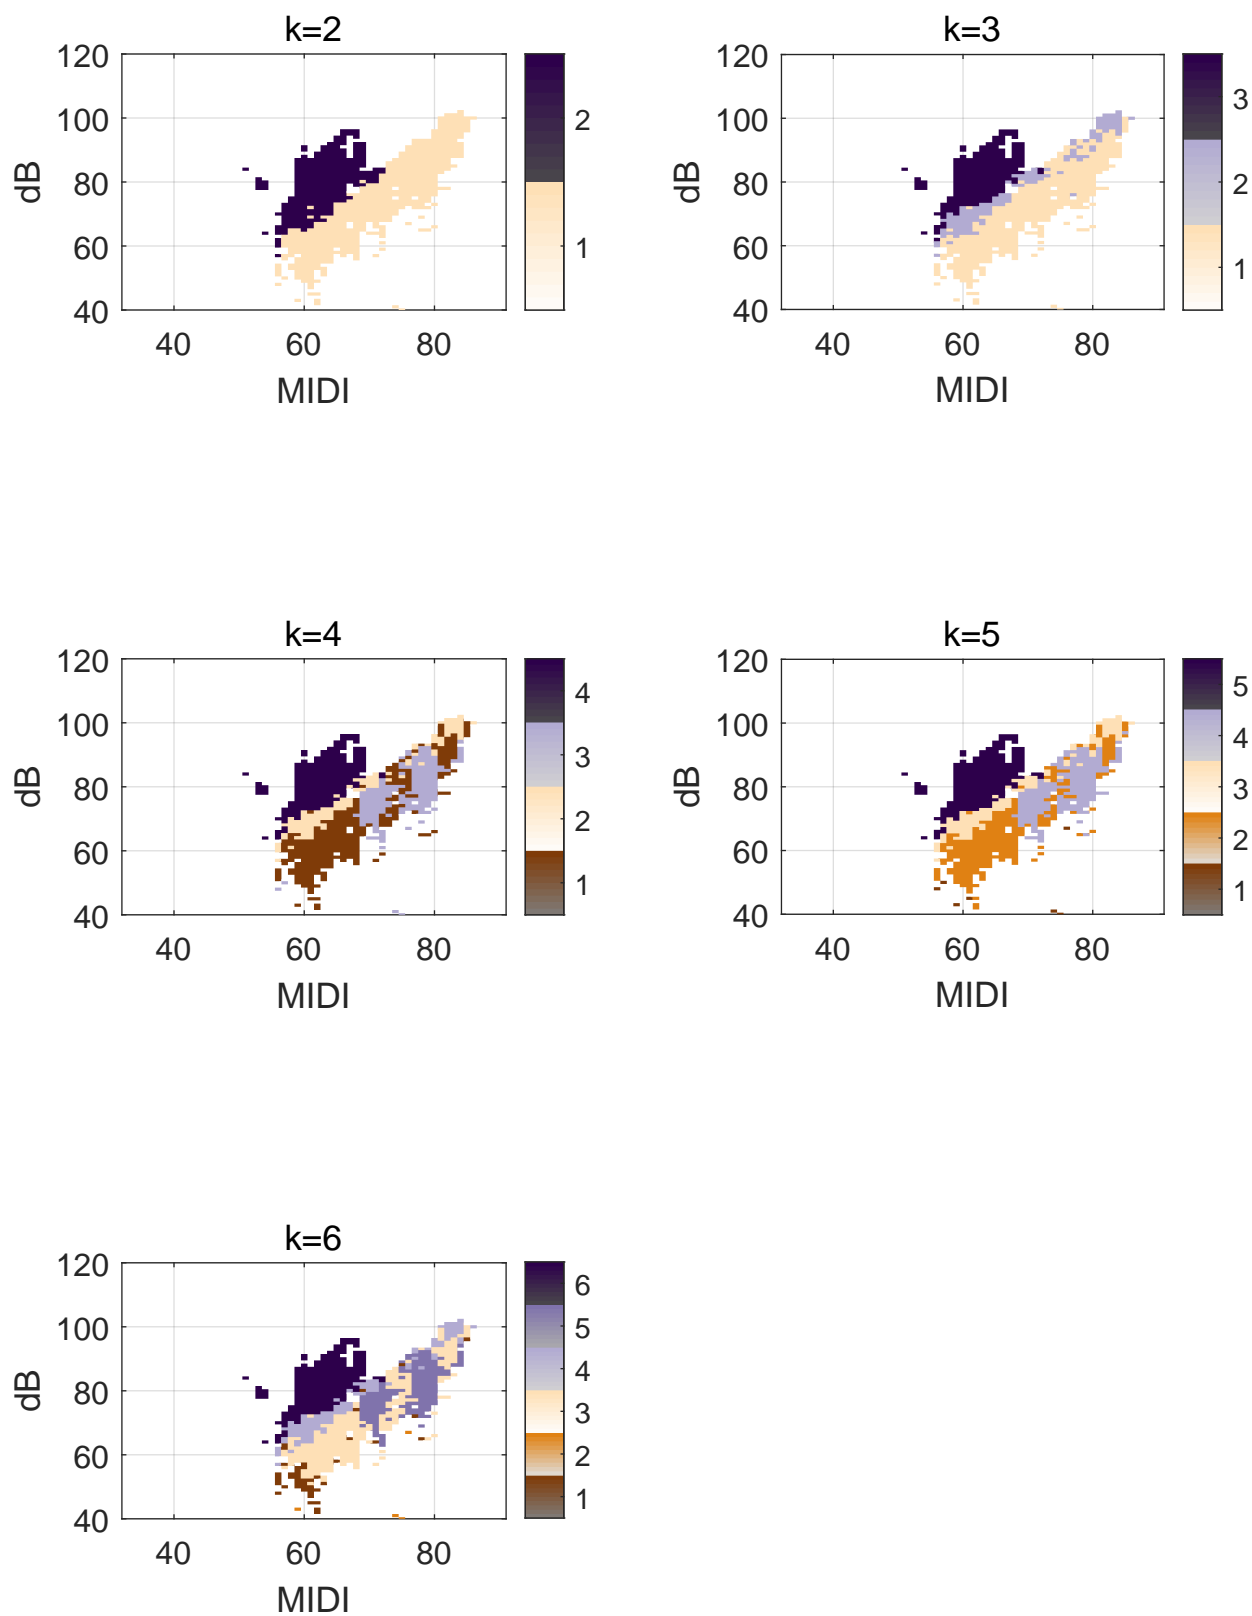

Figure S72: Acoustic and EGG Metric maps for participant G02

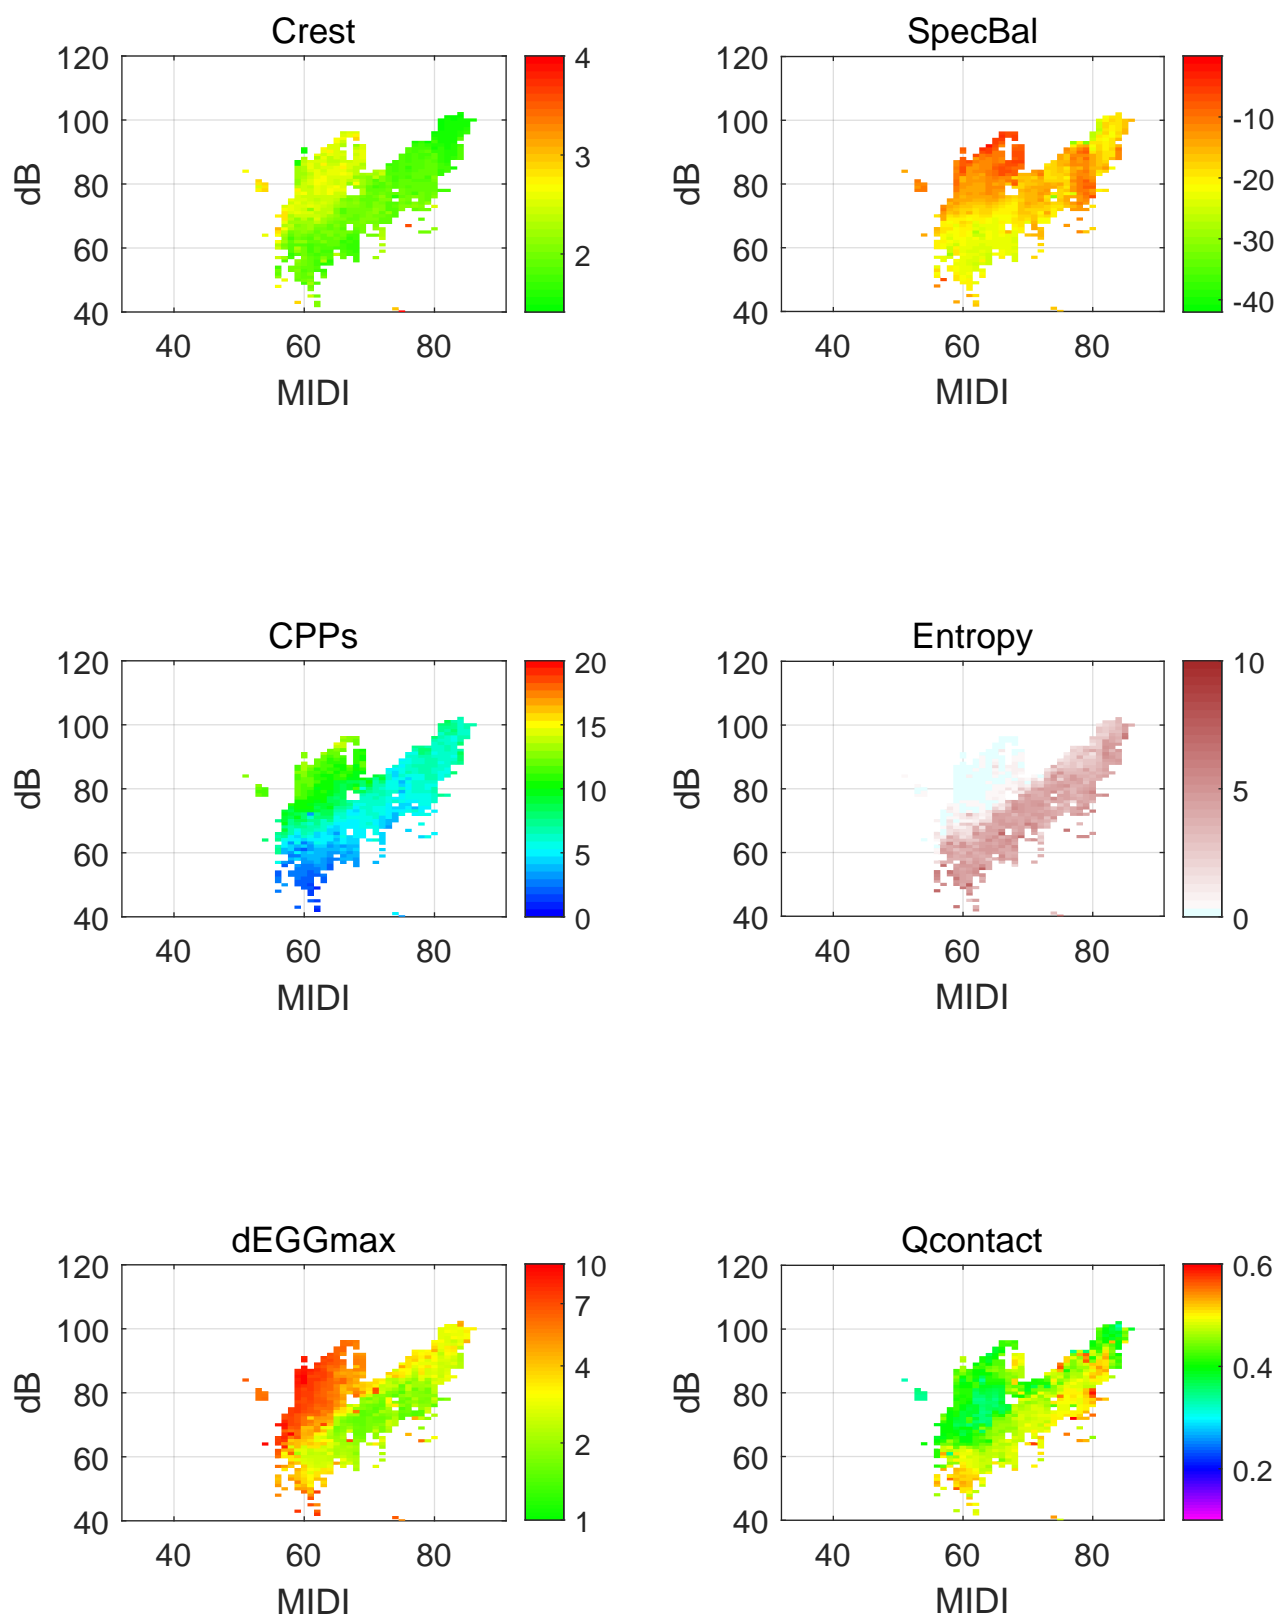

Figure S73: Classification voice maps for participant G03

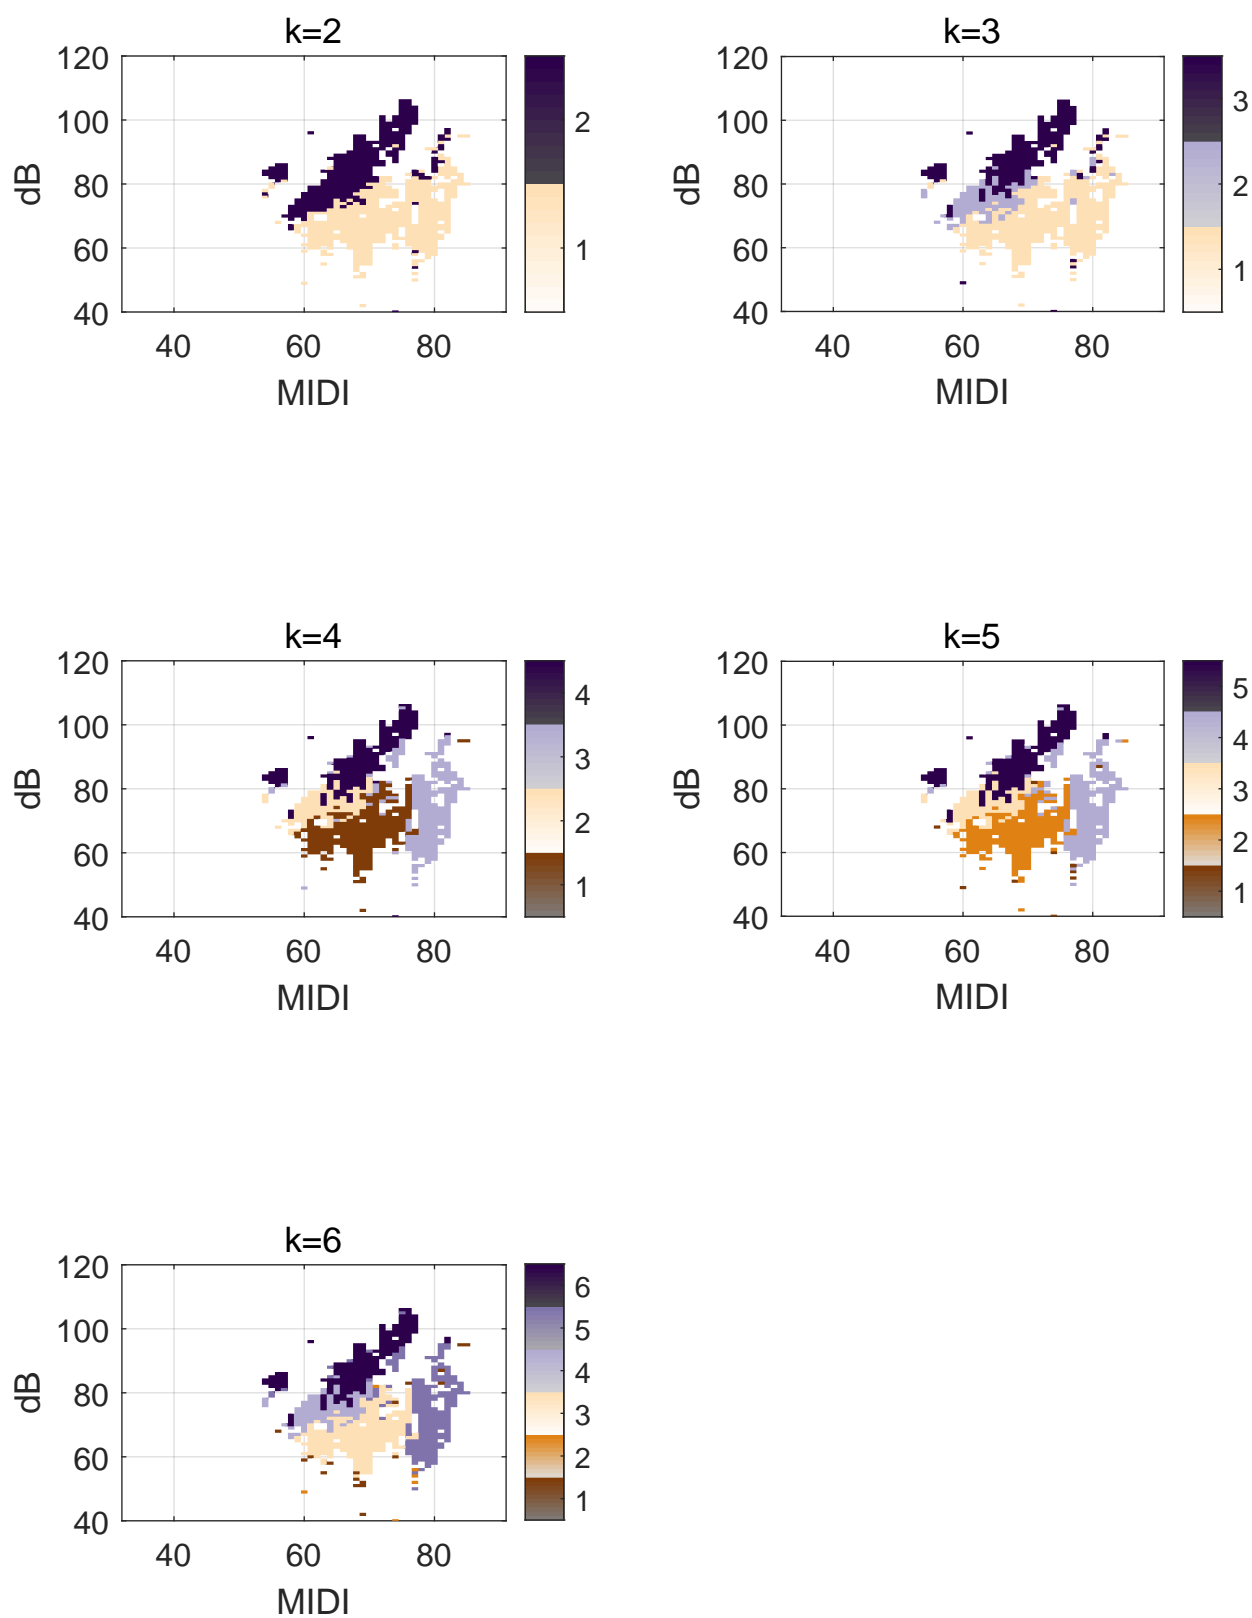

Figure S74: Acoustic and EGG Metric maps for participant G03

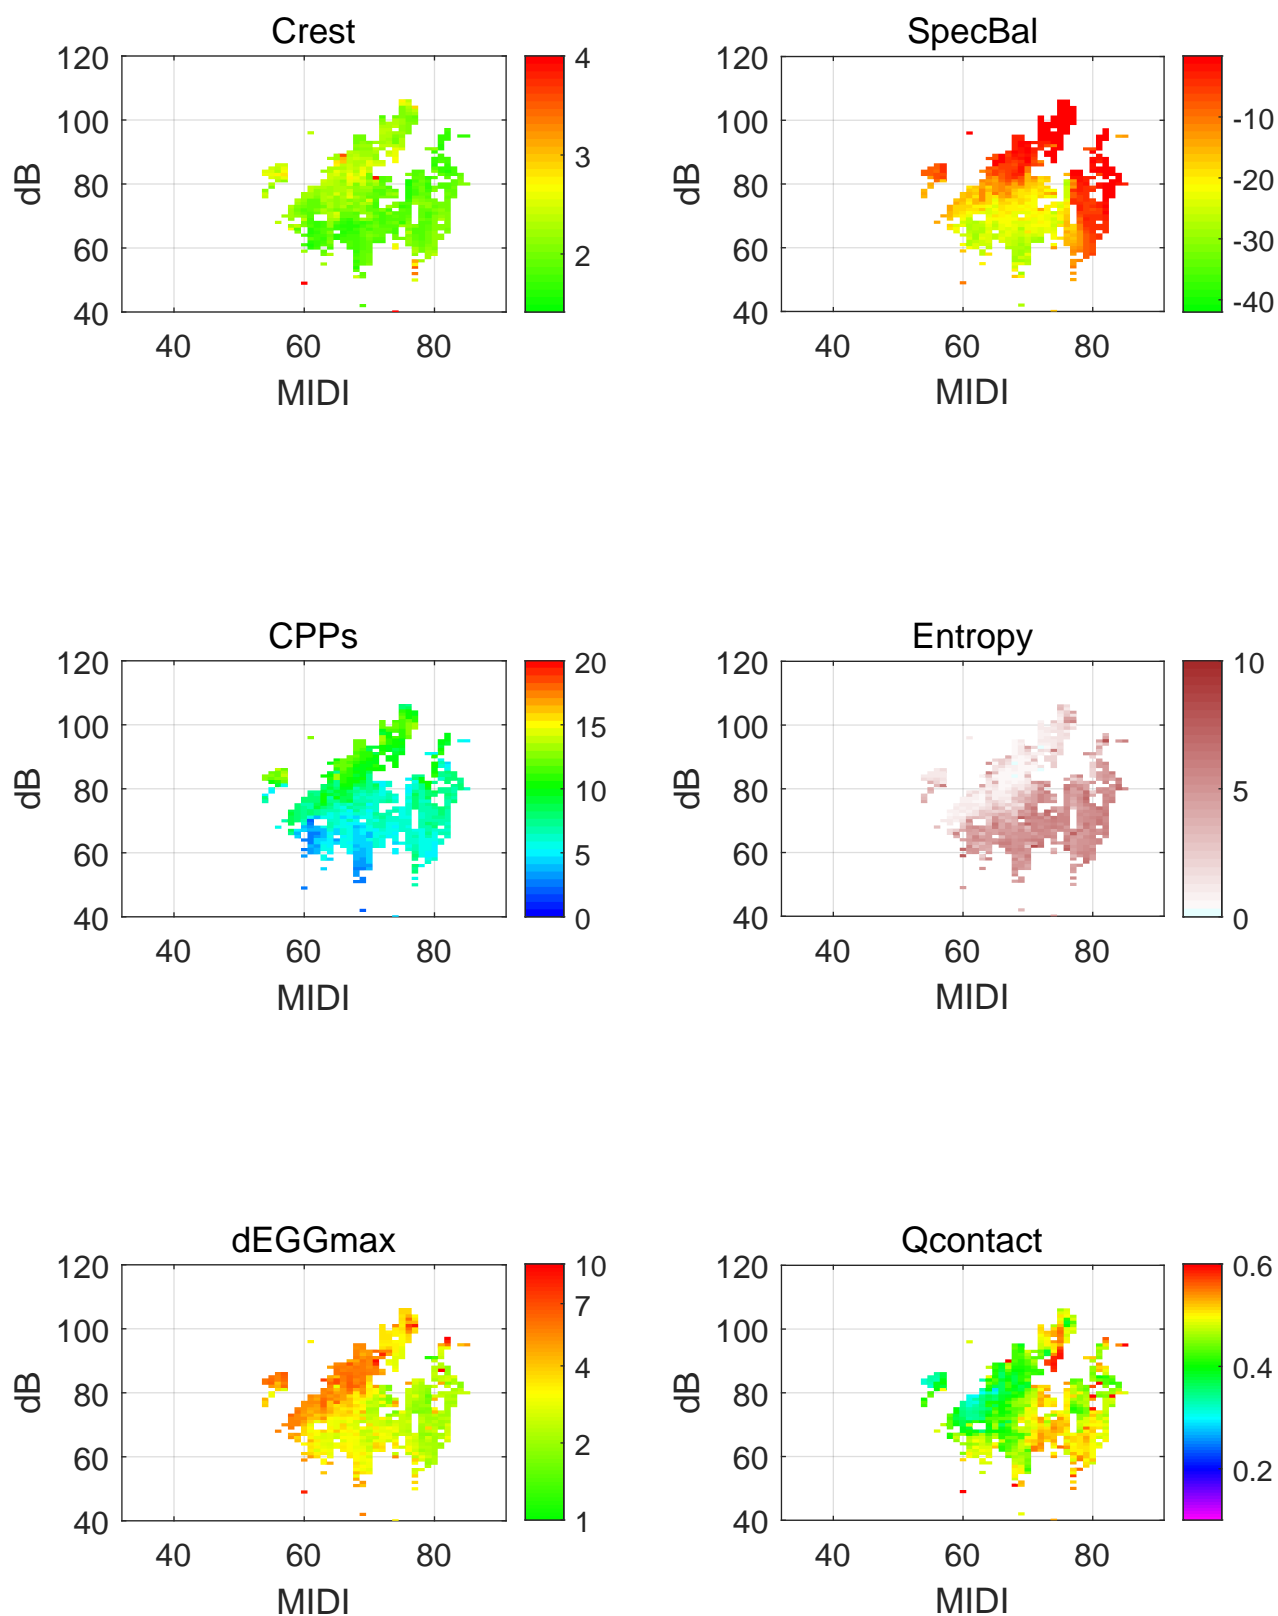

Figure S75: Classification voice maps for participant G04

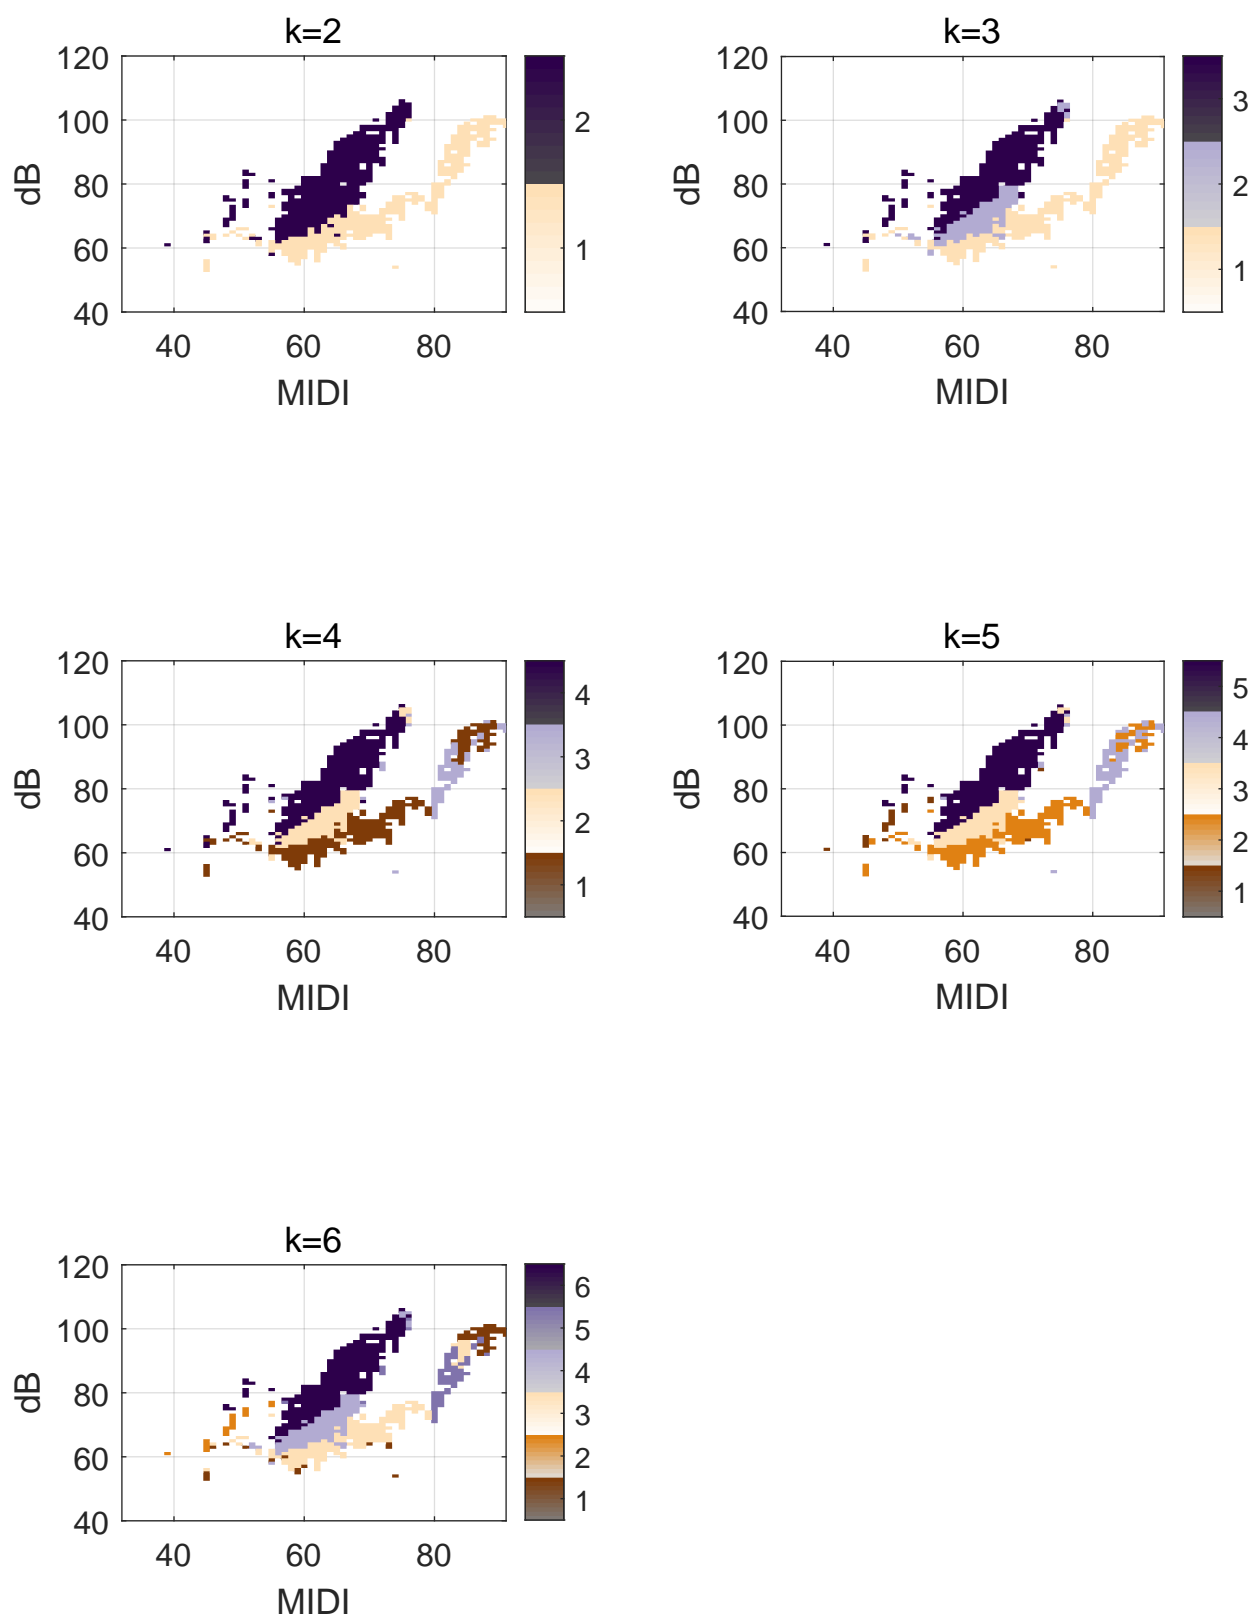



Figure S76: Acoustic and EGG Metric maps for participant G04

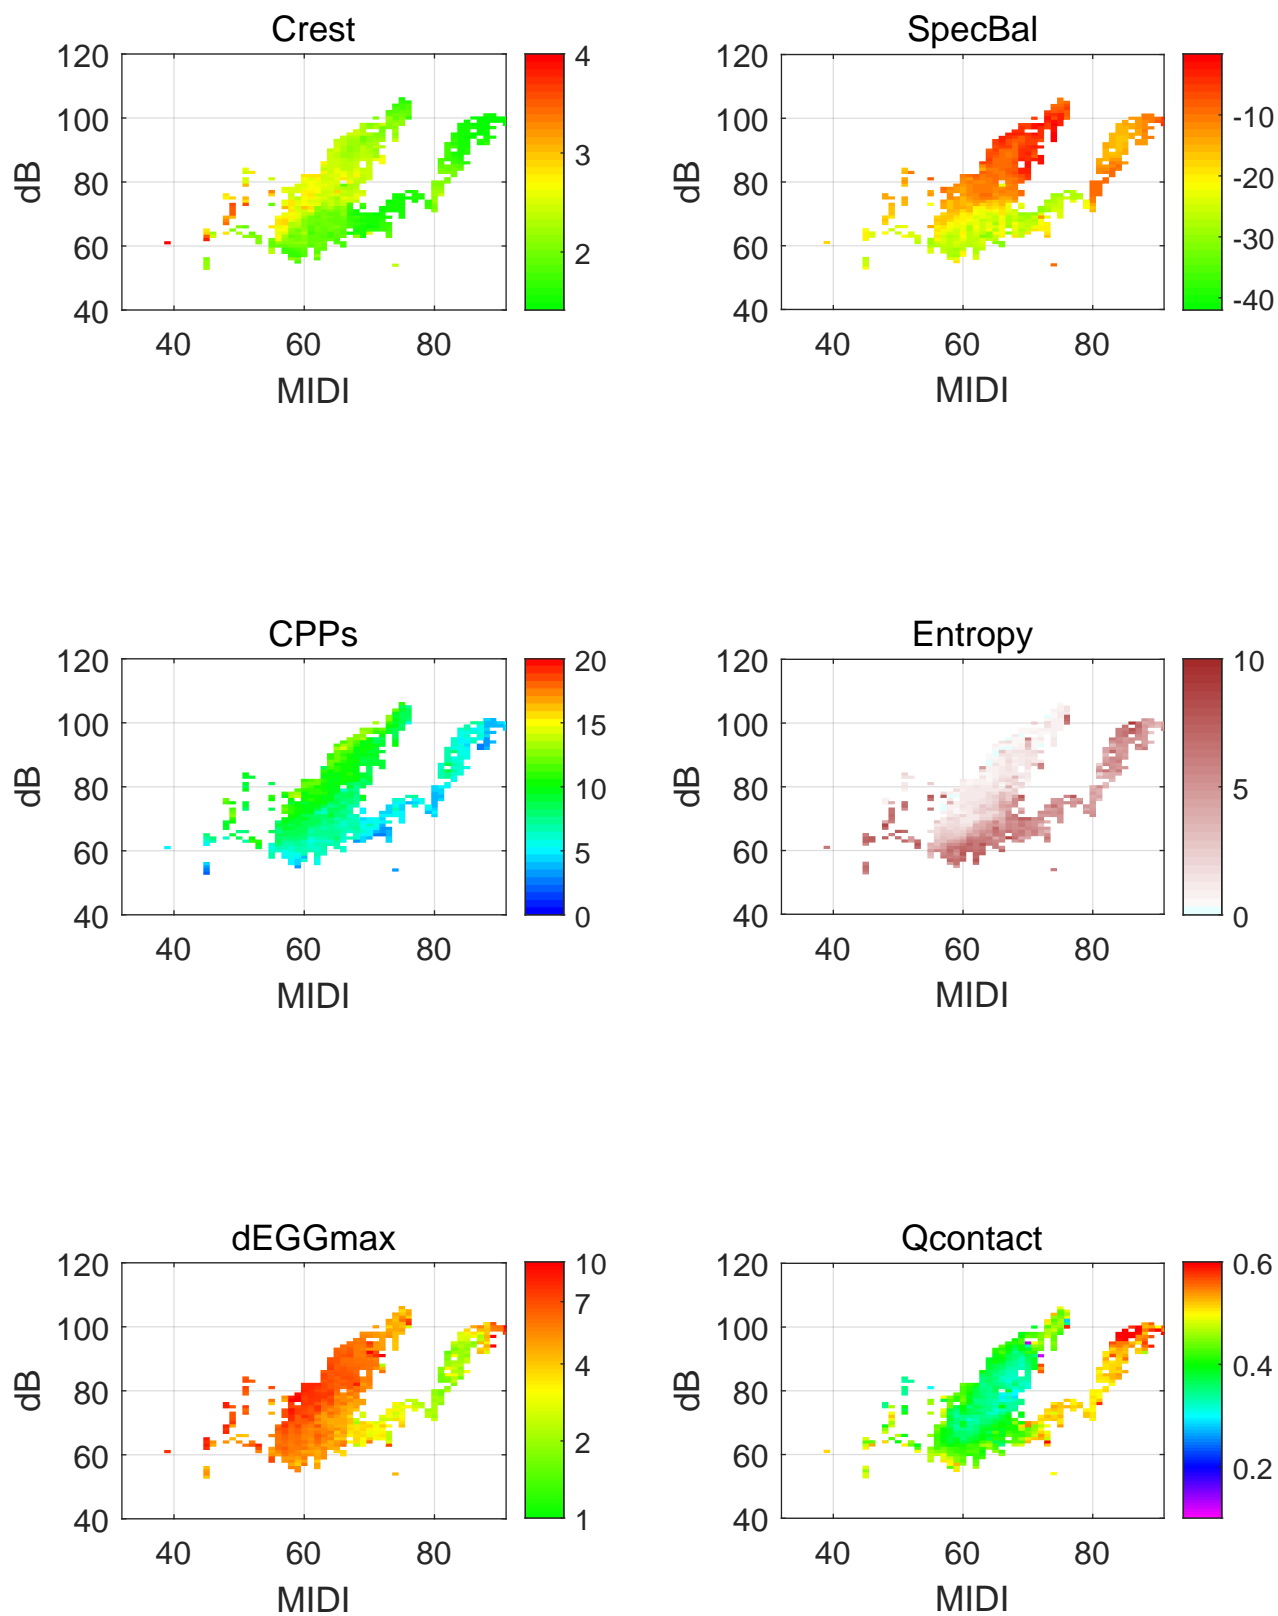

Figure S77: Classification voice maps for participant G05

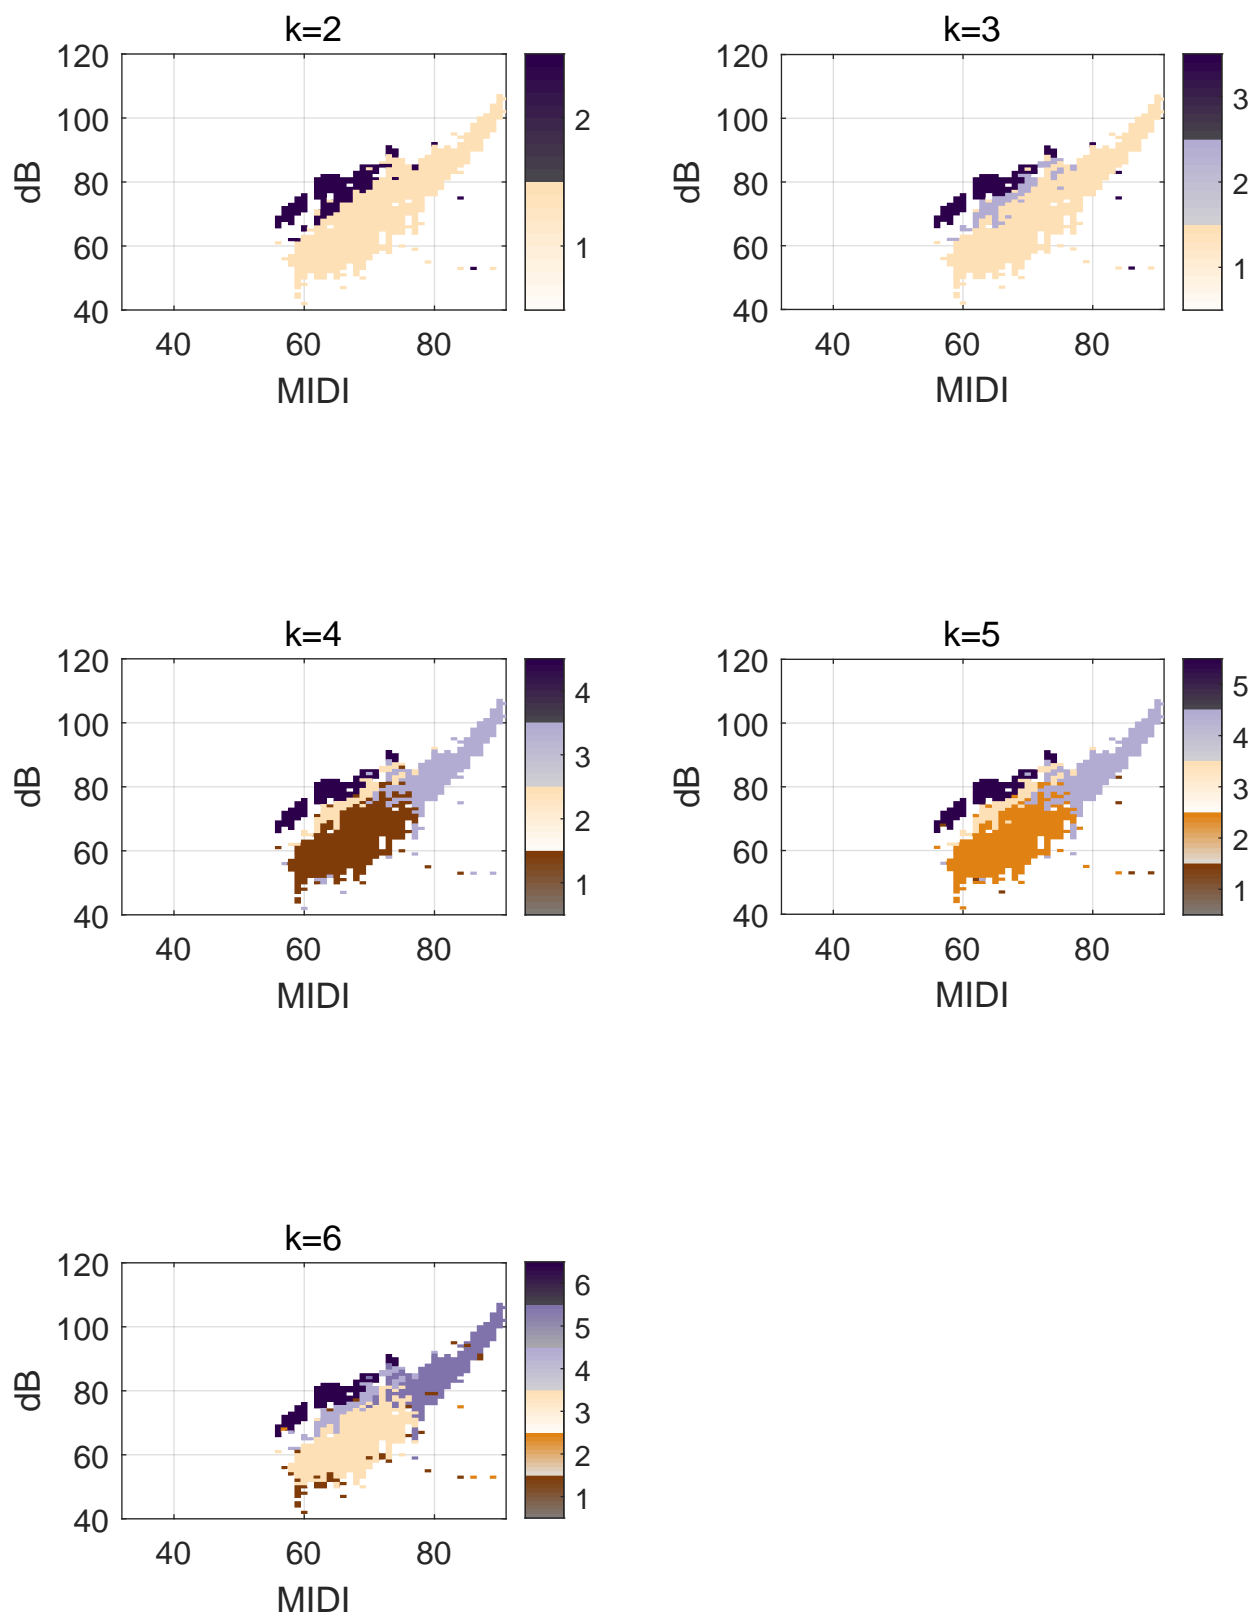

Figure S78: Acoustic and EGG Metric maps for participant G05

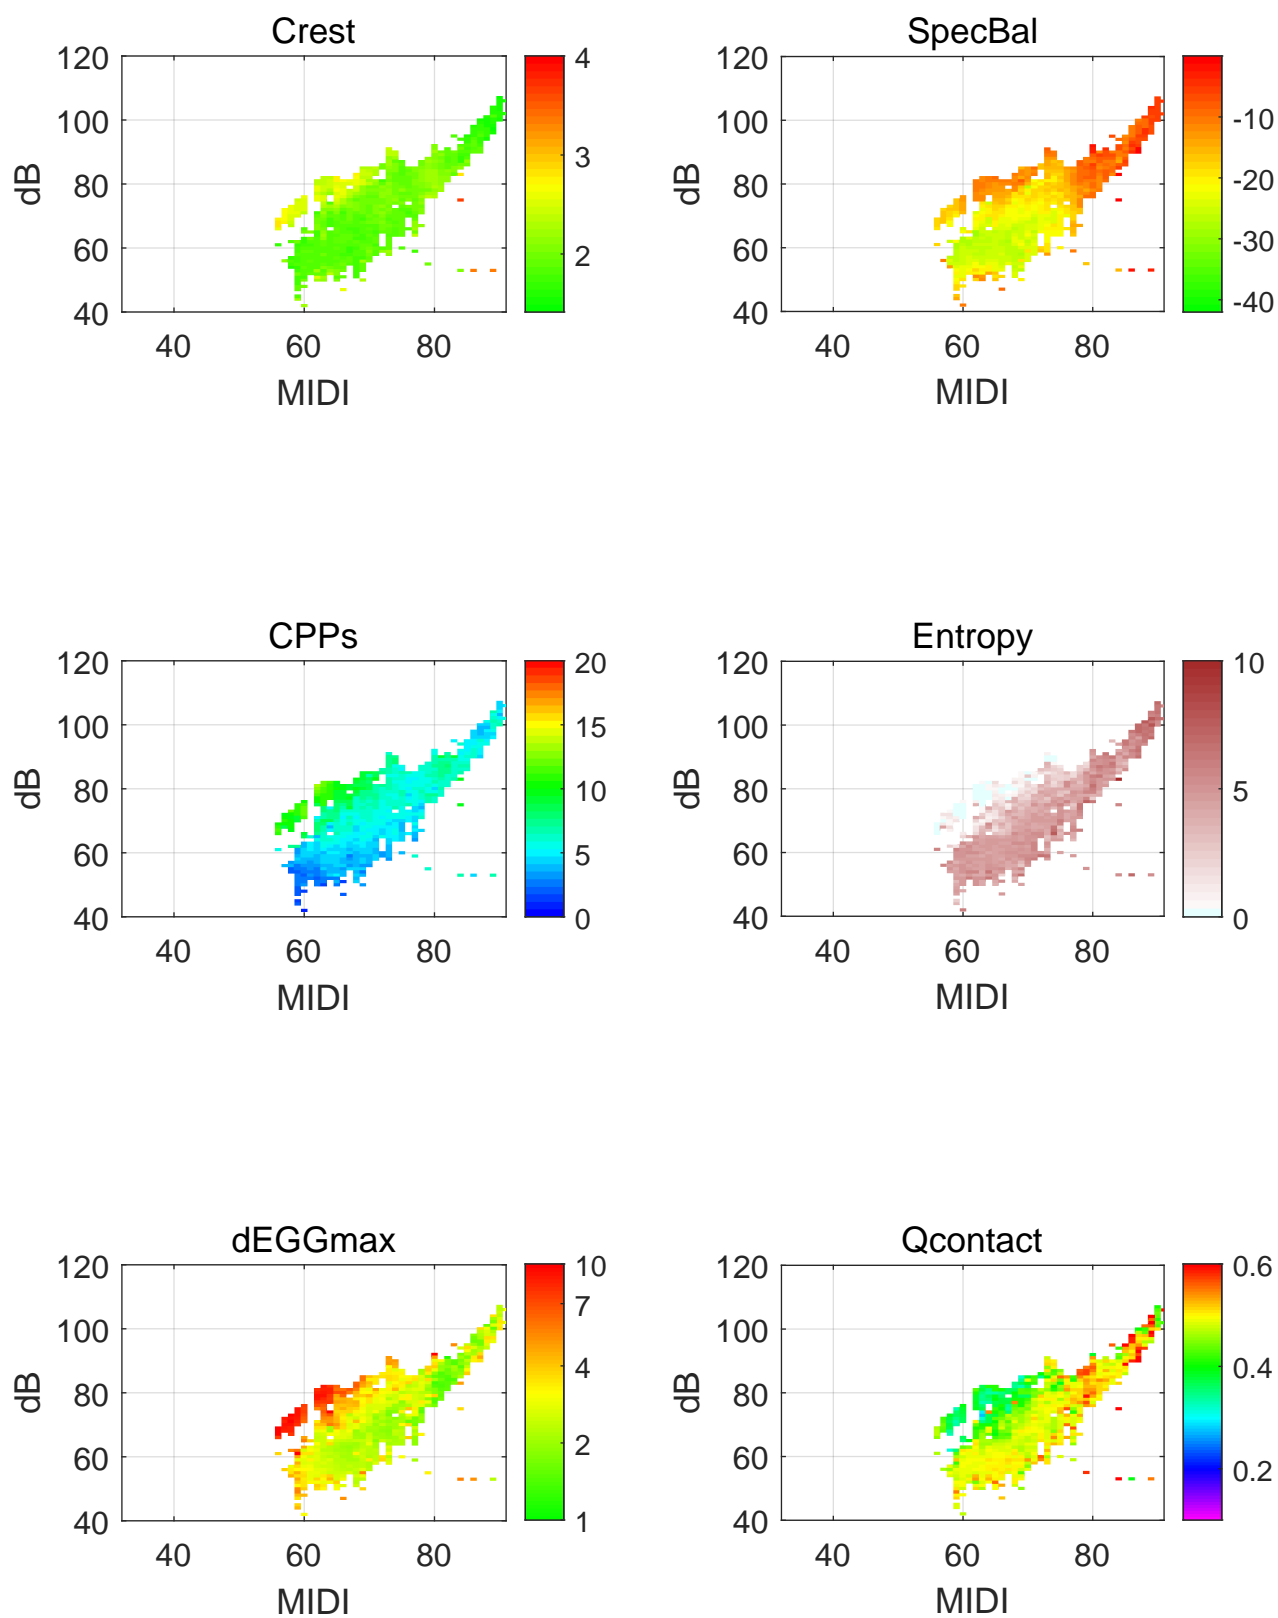

Figure S79: Classification voice maps for participant G06

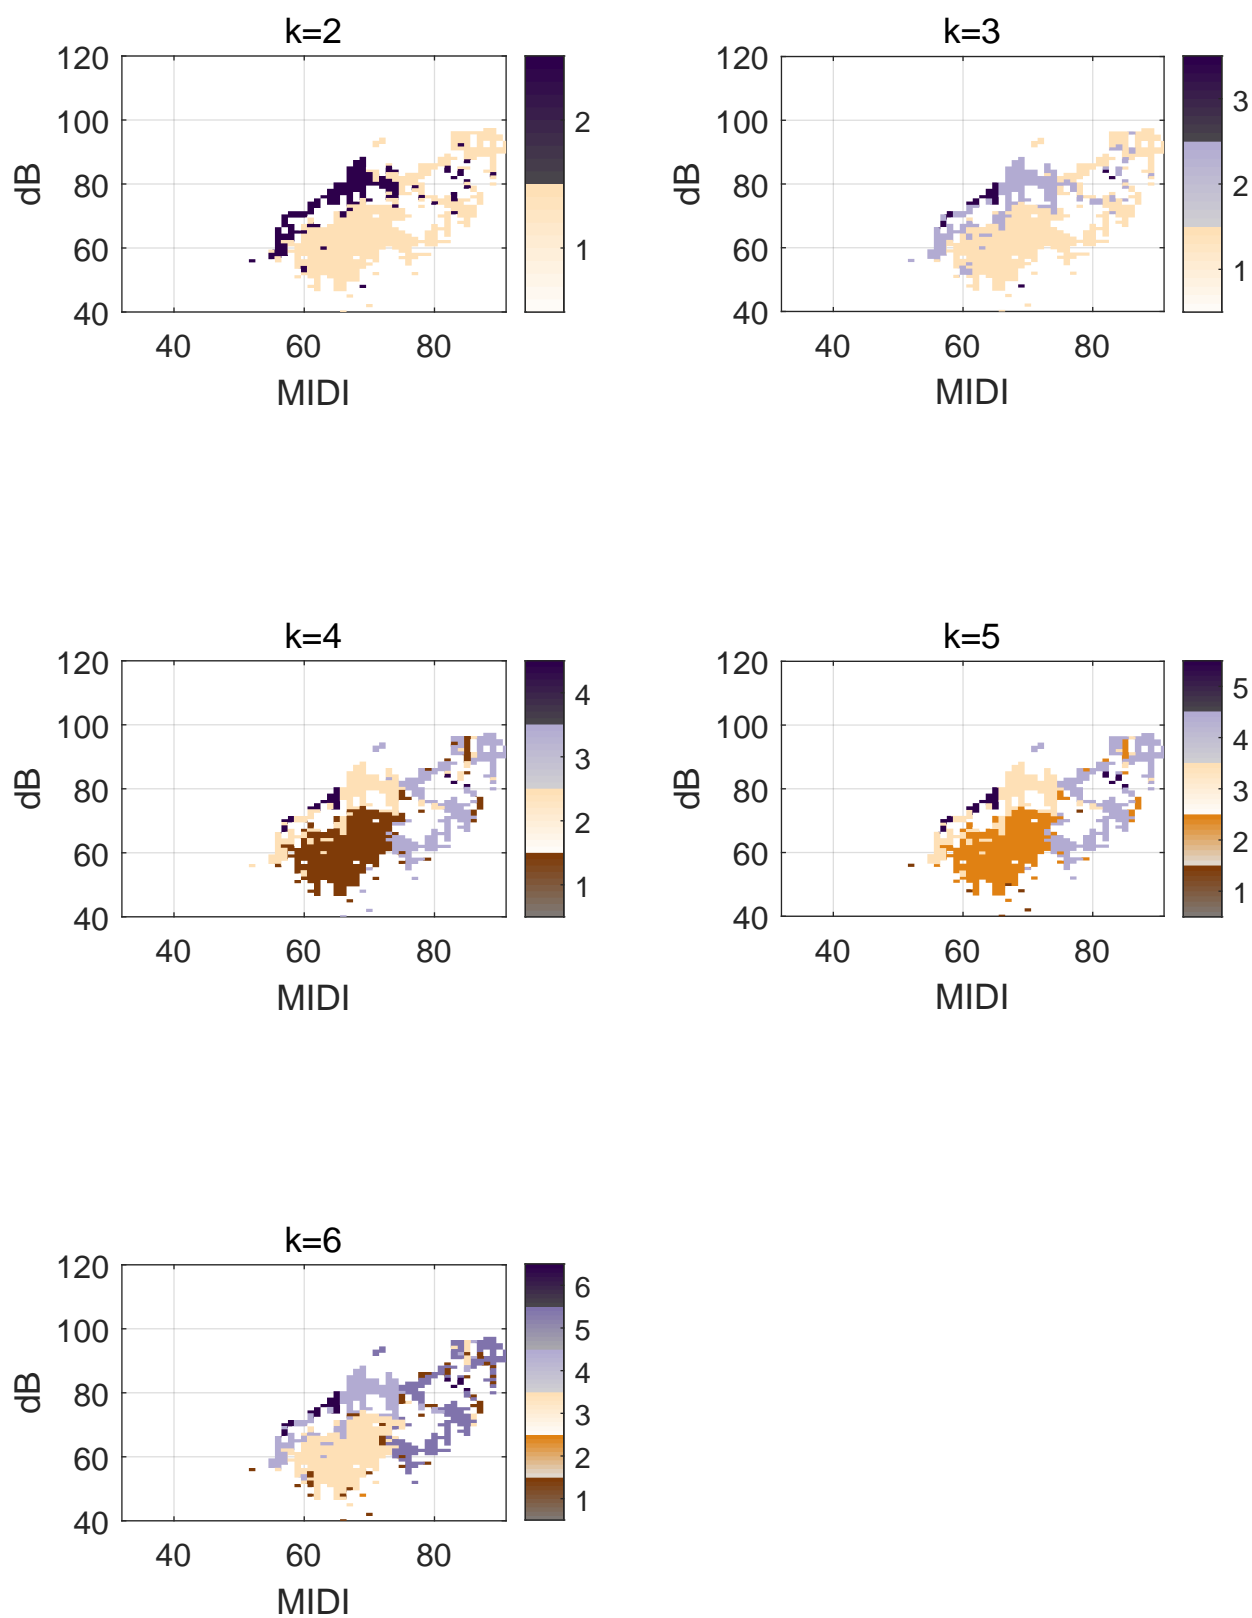

Figure S80: Acoustic and EGG Metric maps for participant G06

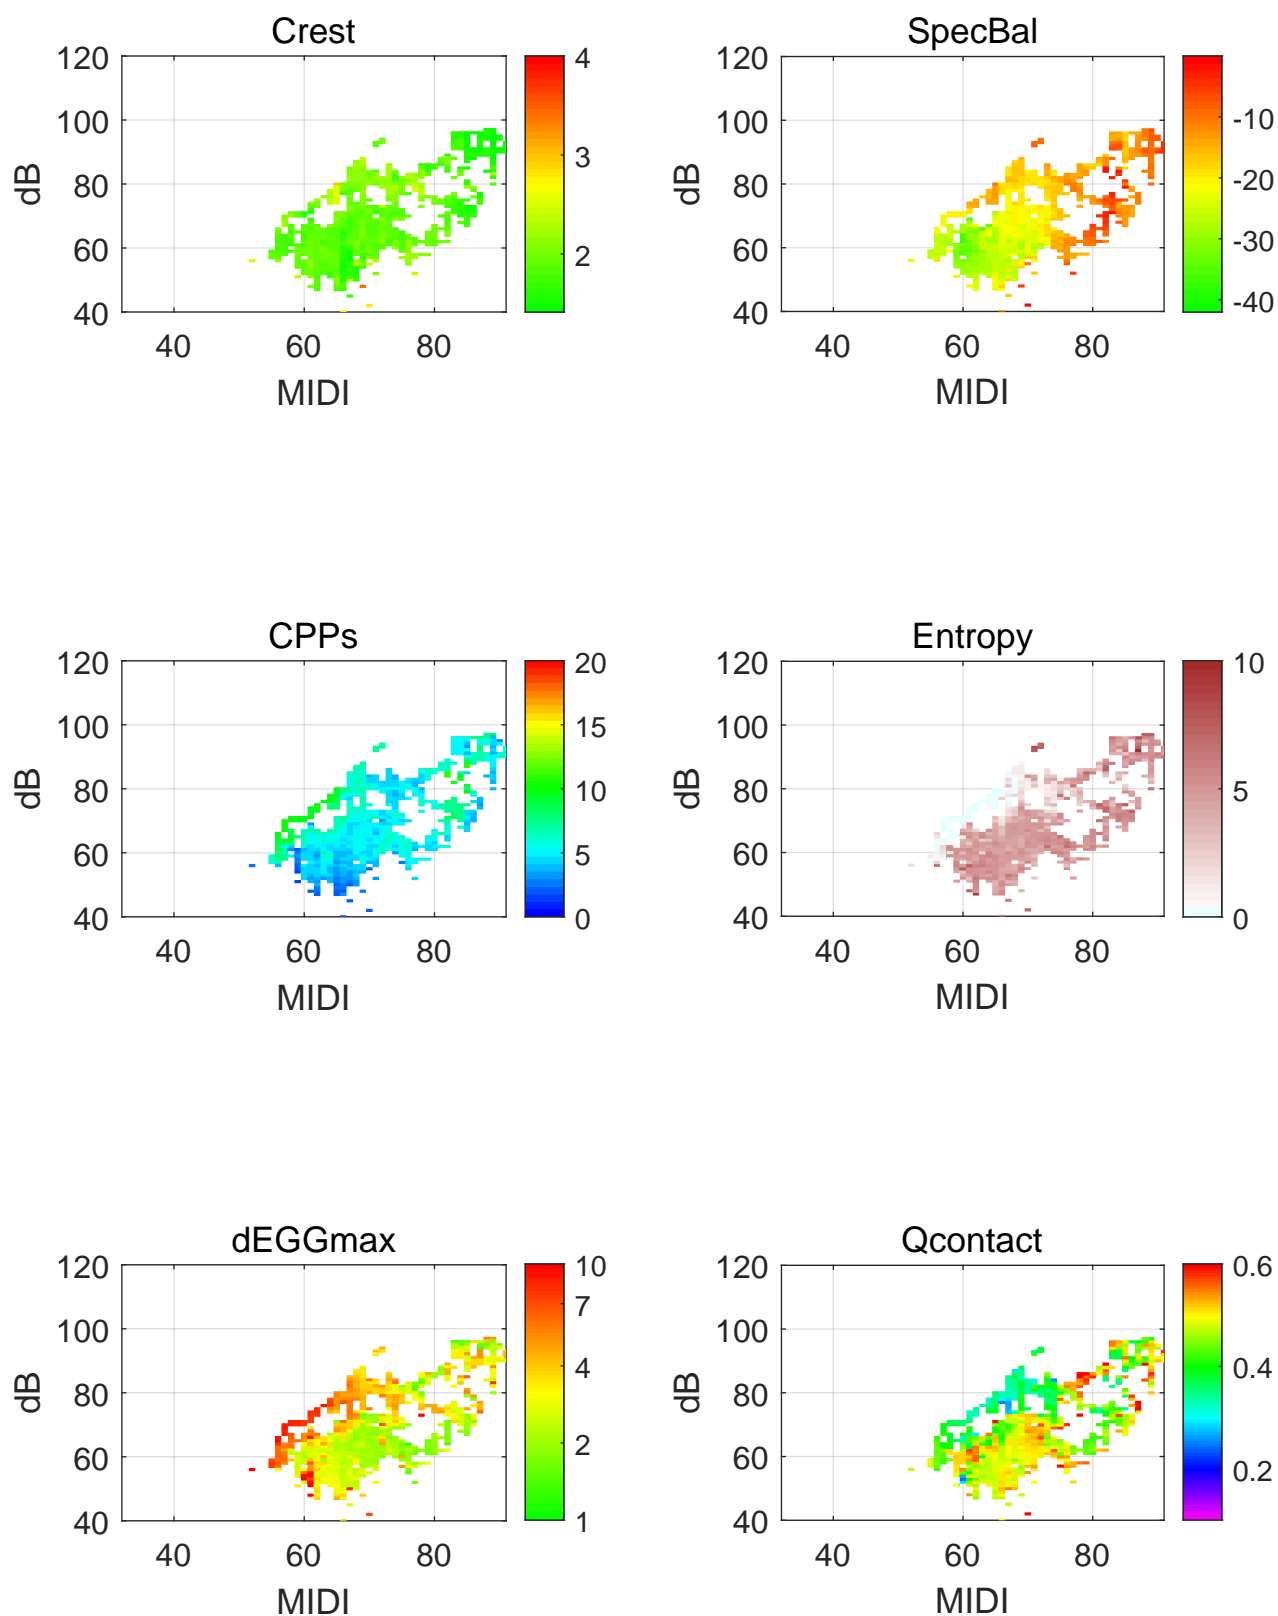

Figure S81: Classification voice maps for participant G07

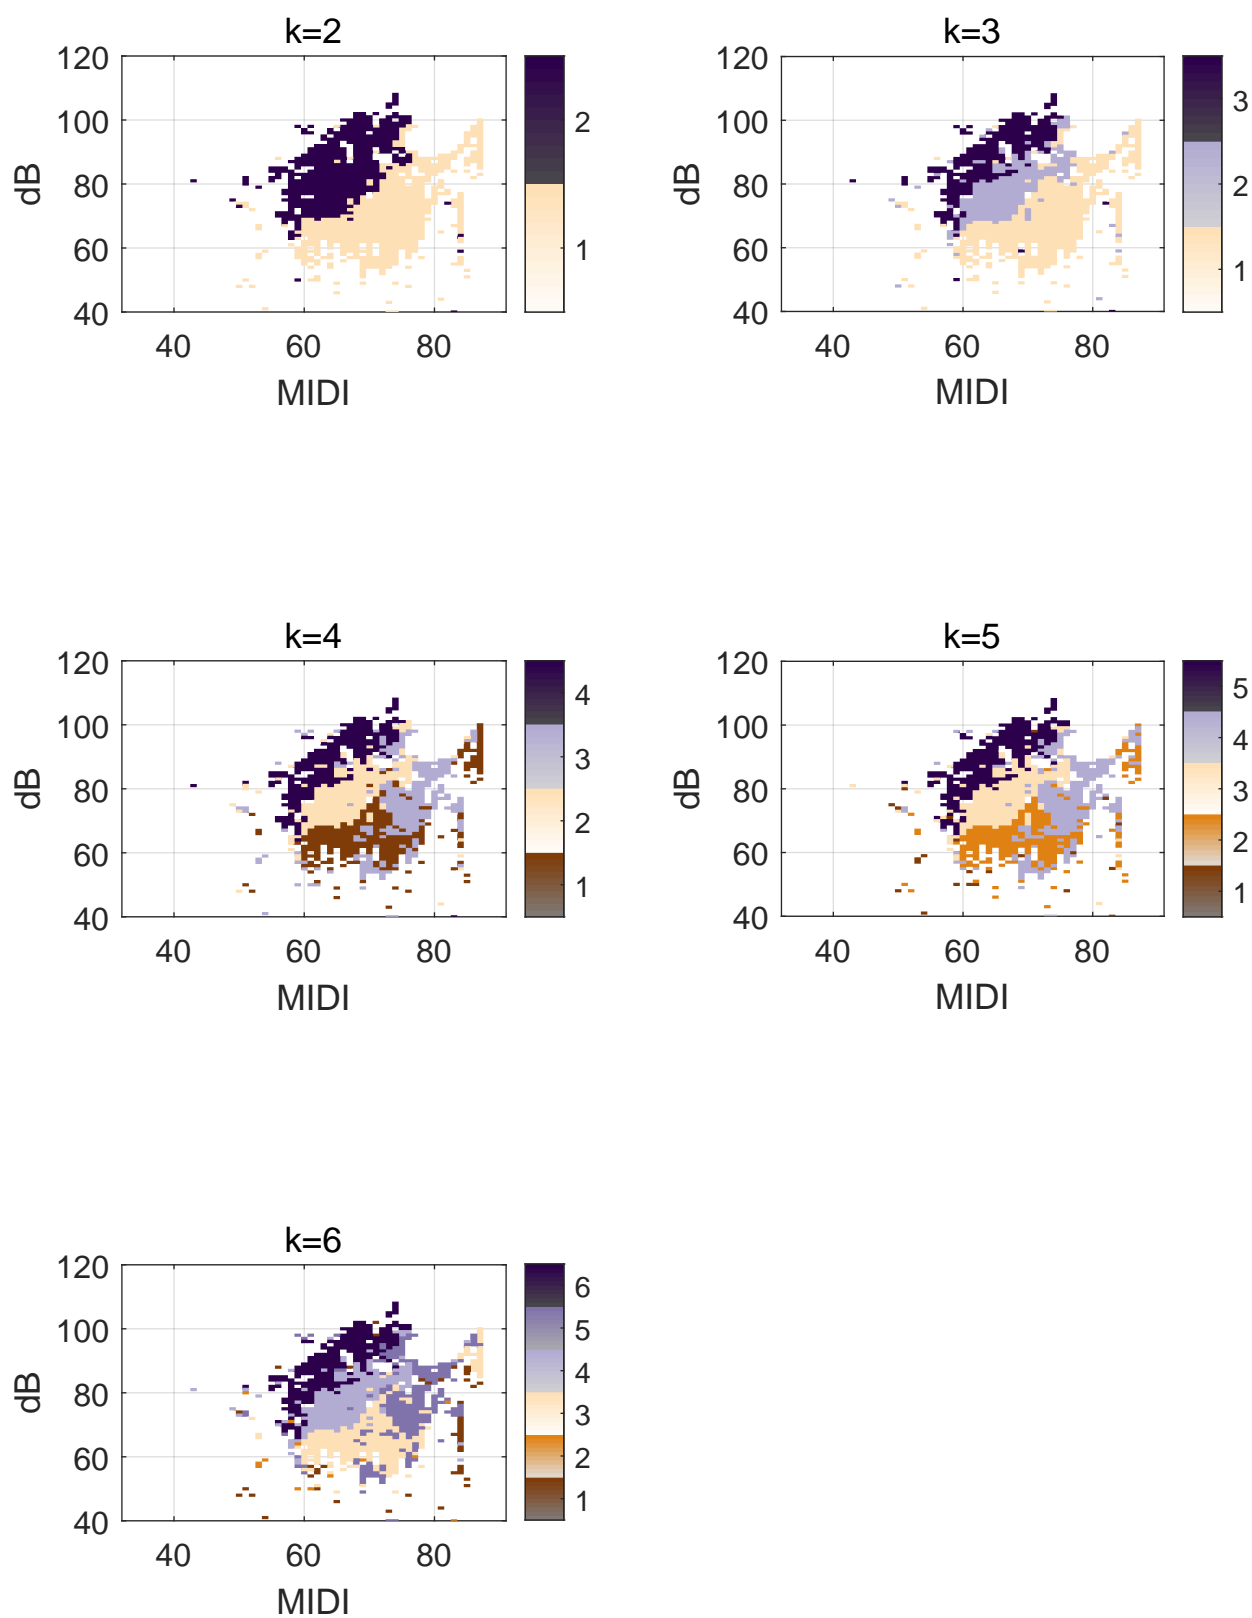

Figure S82: Acoustic and EGG Metric maps for participant G07

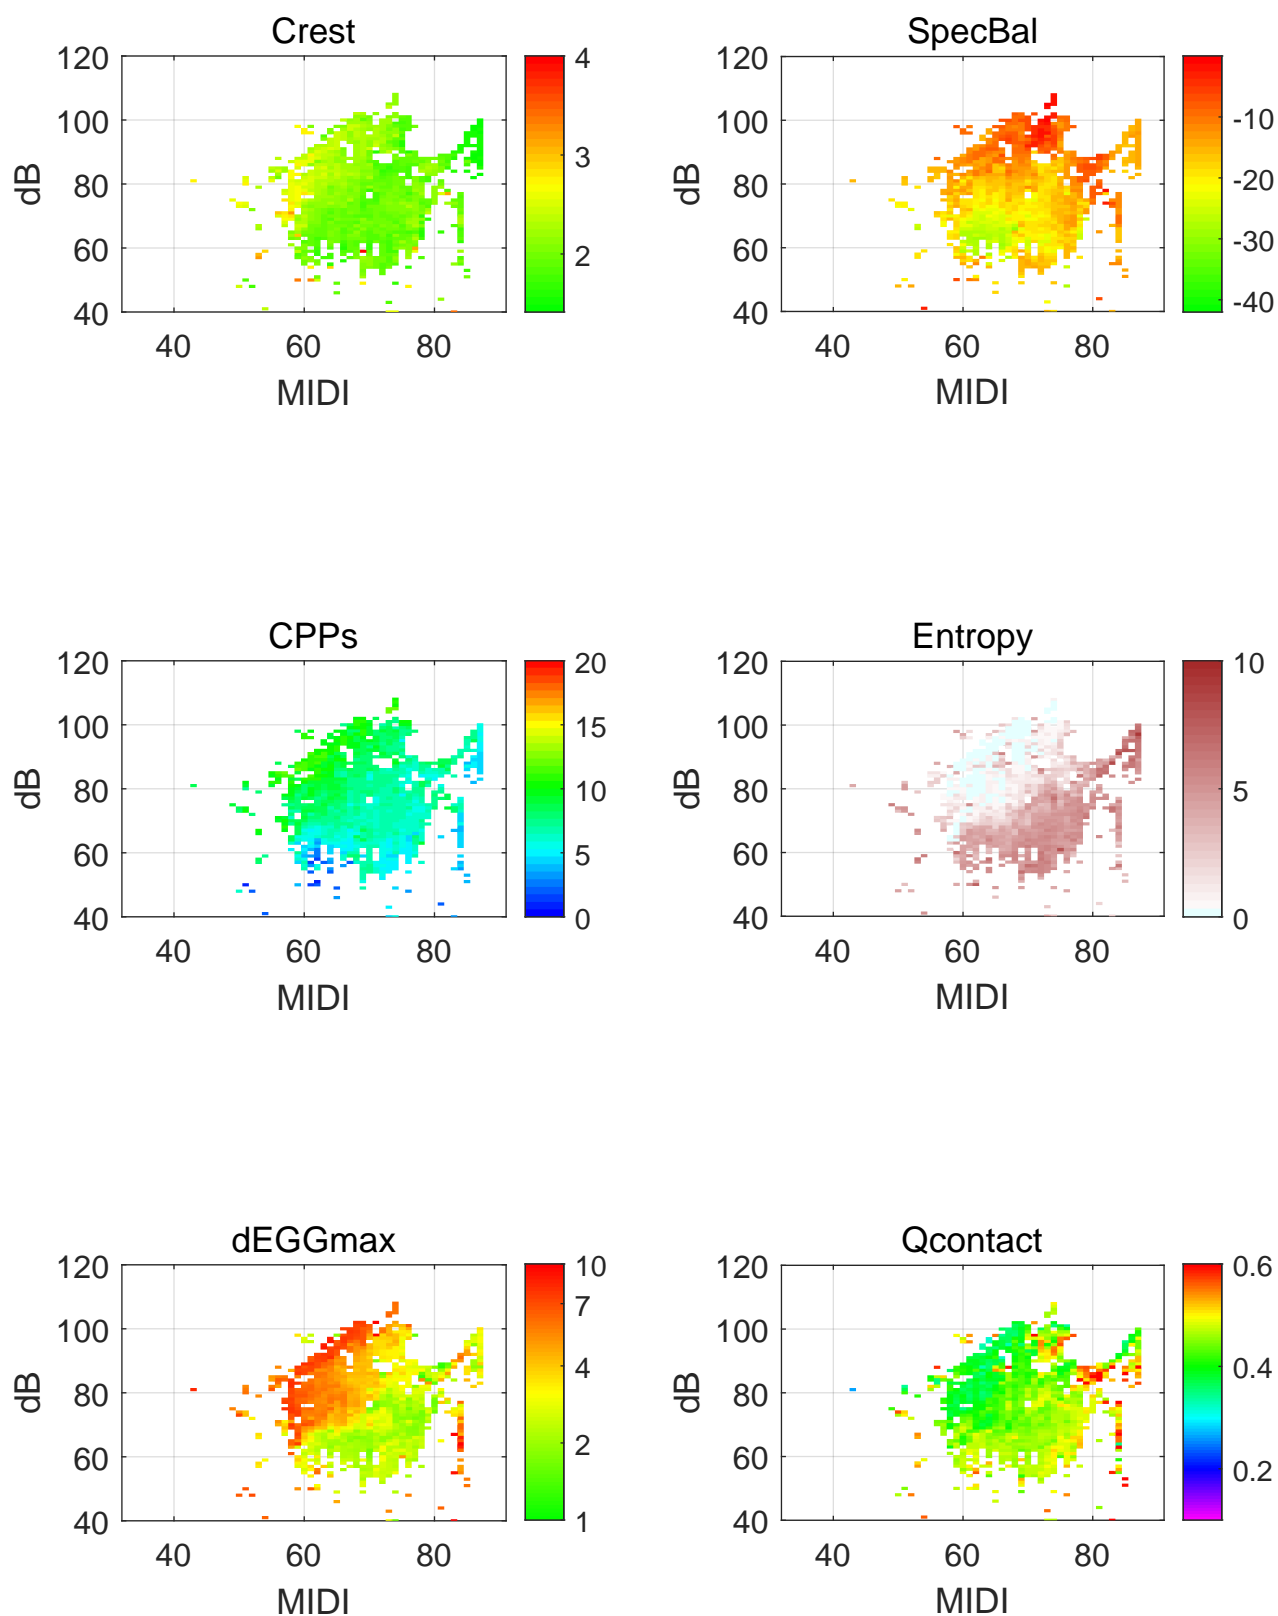

Figure S83: Classification voice maps for participant G08

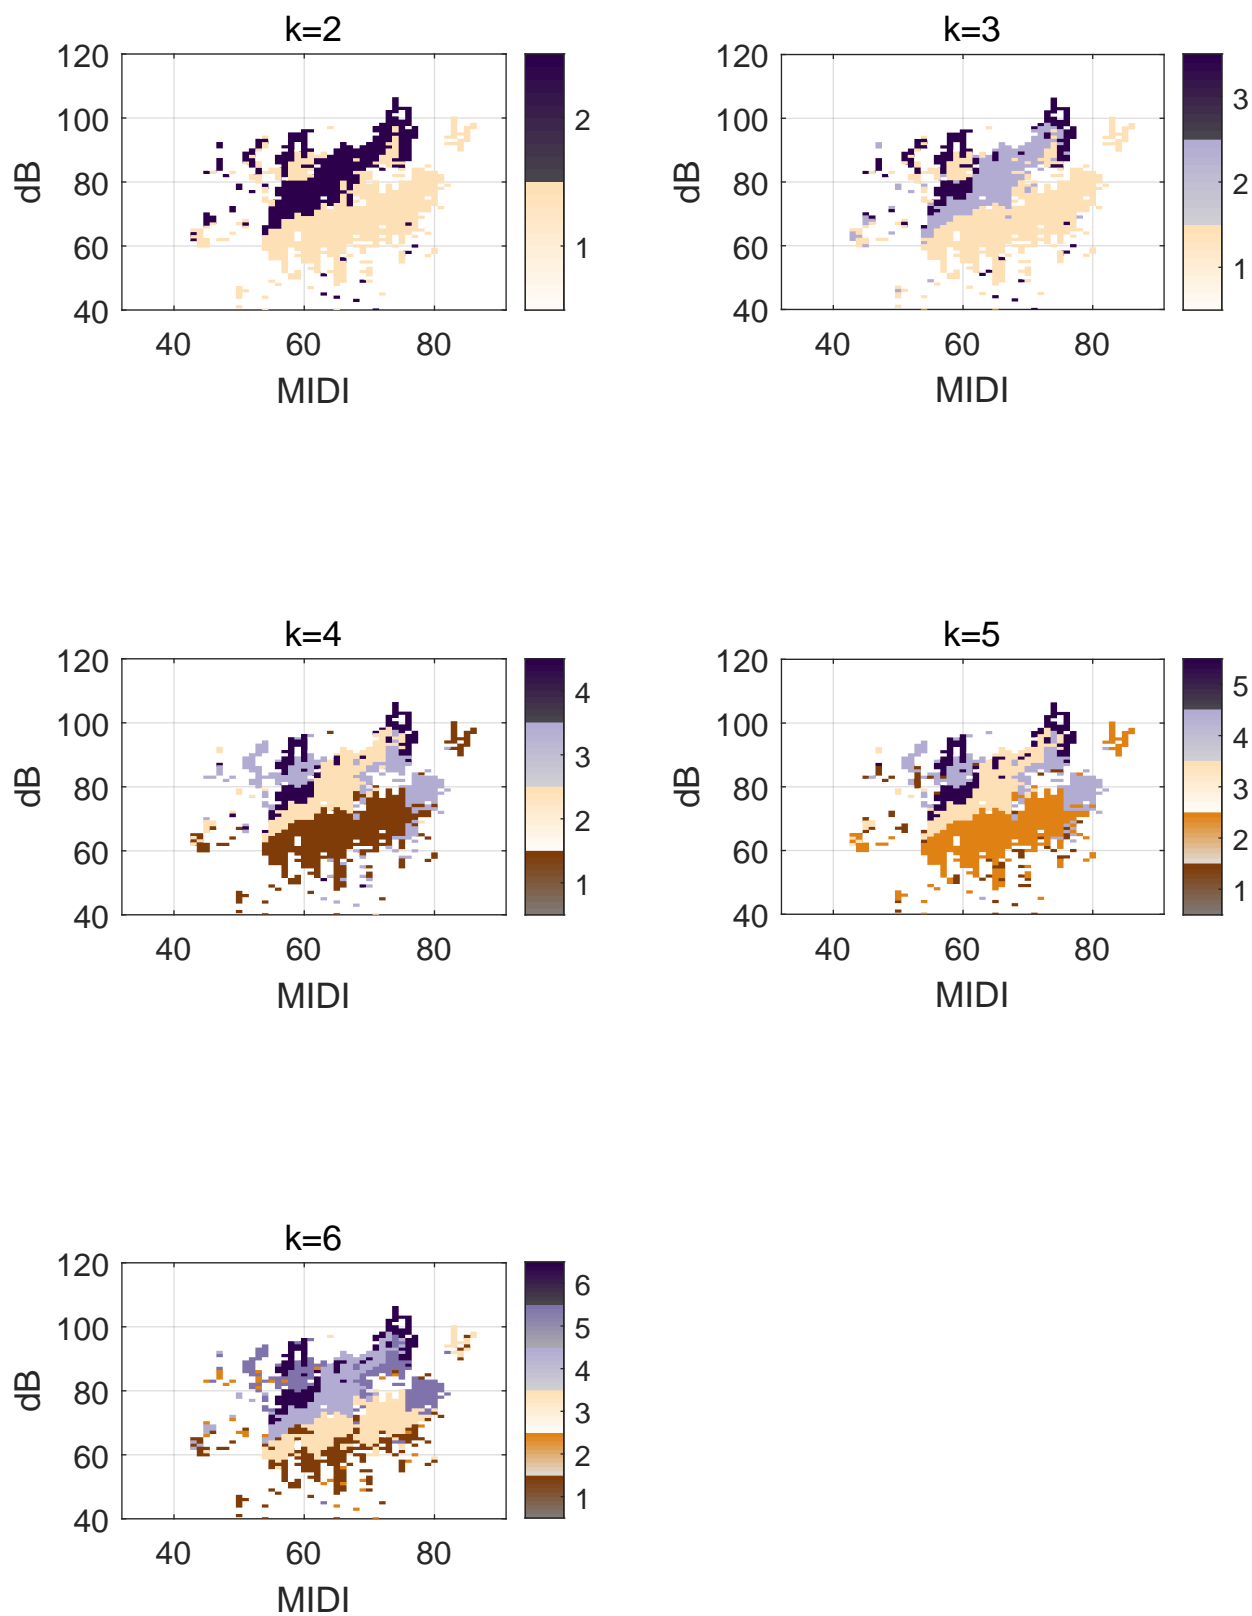



Figure S84: Acoustic and EGG Metric maps for participant G08

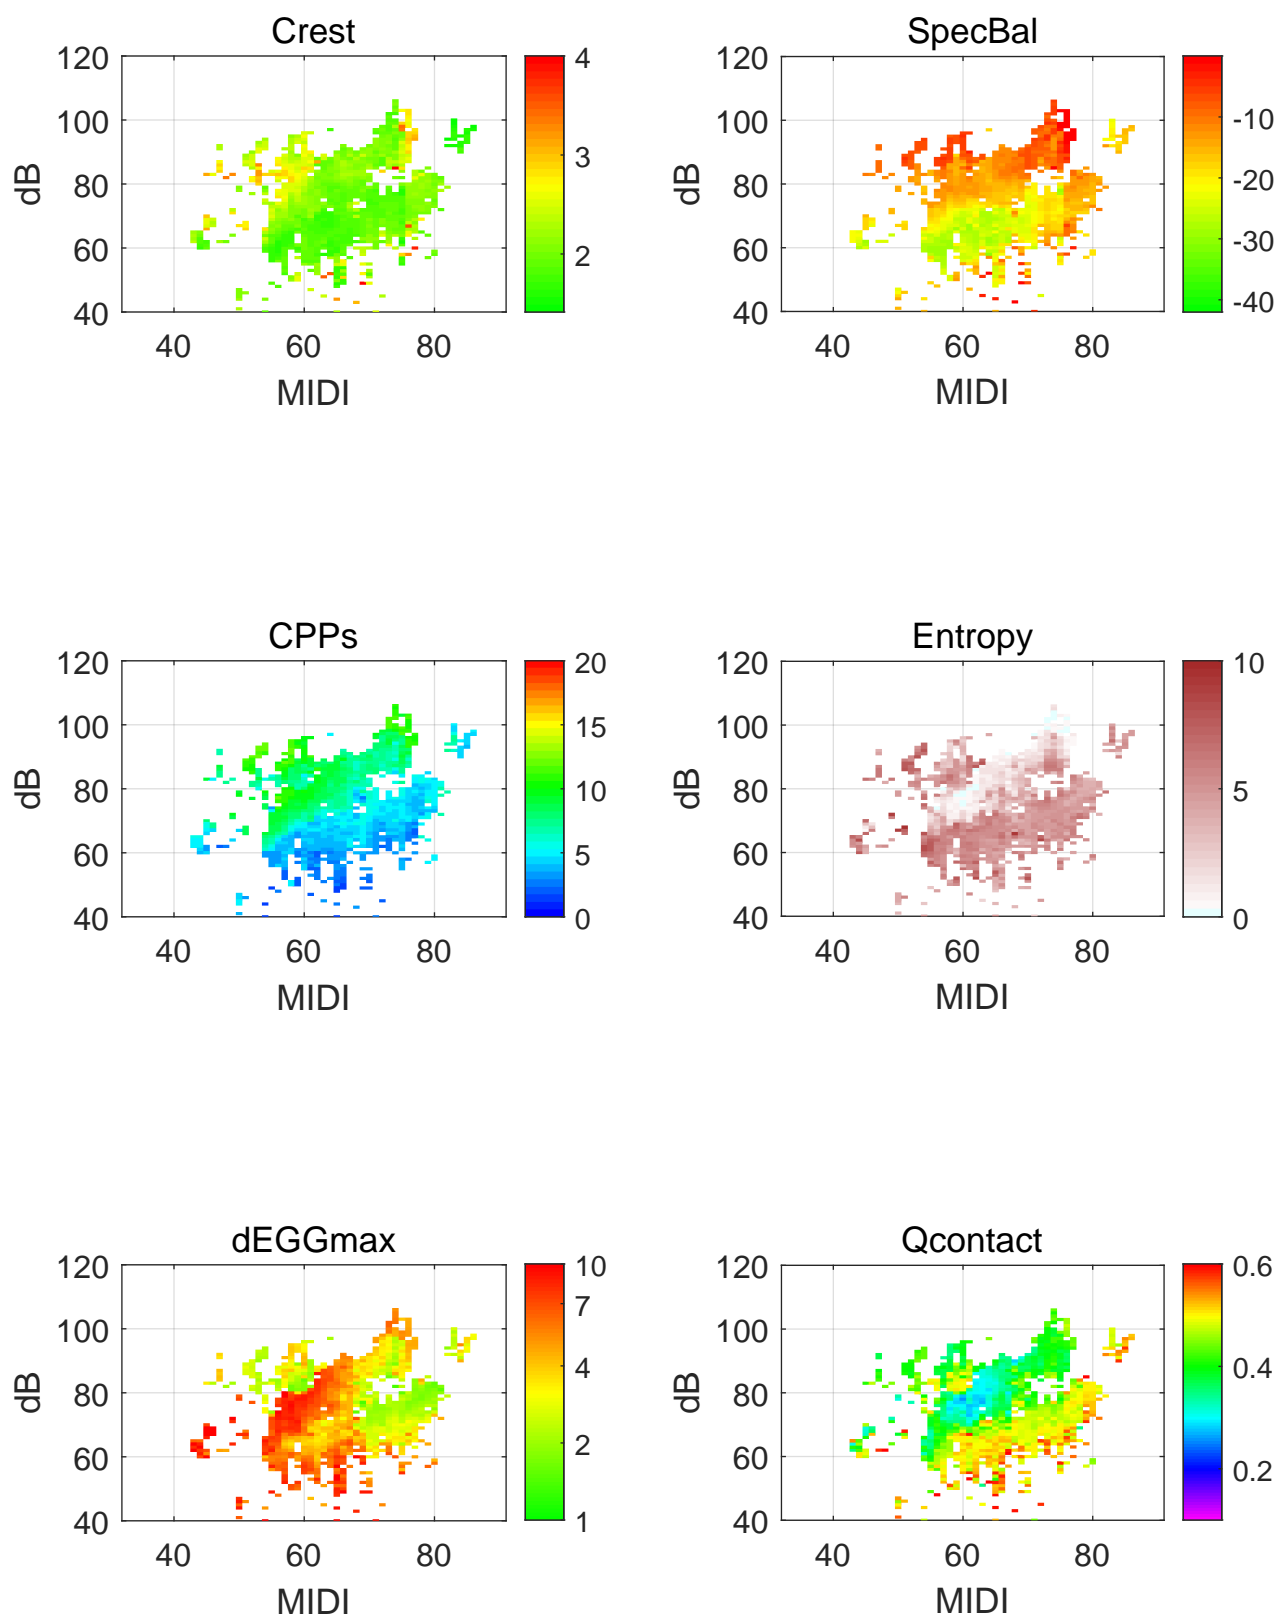

Figure S85: Classification voice maps for participant G09

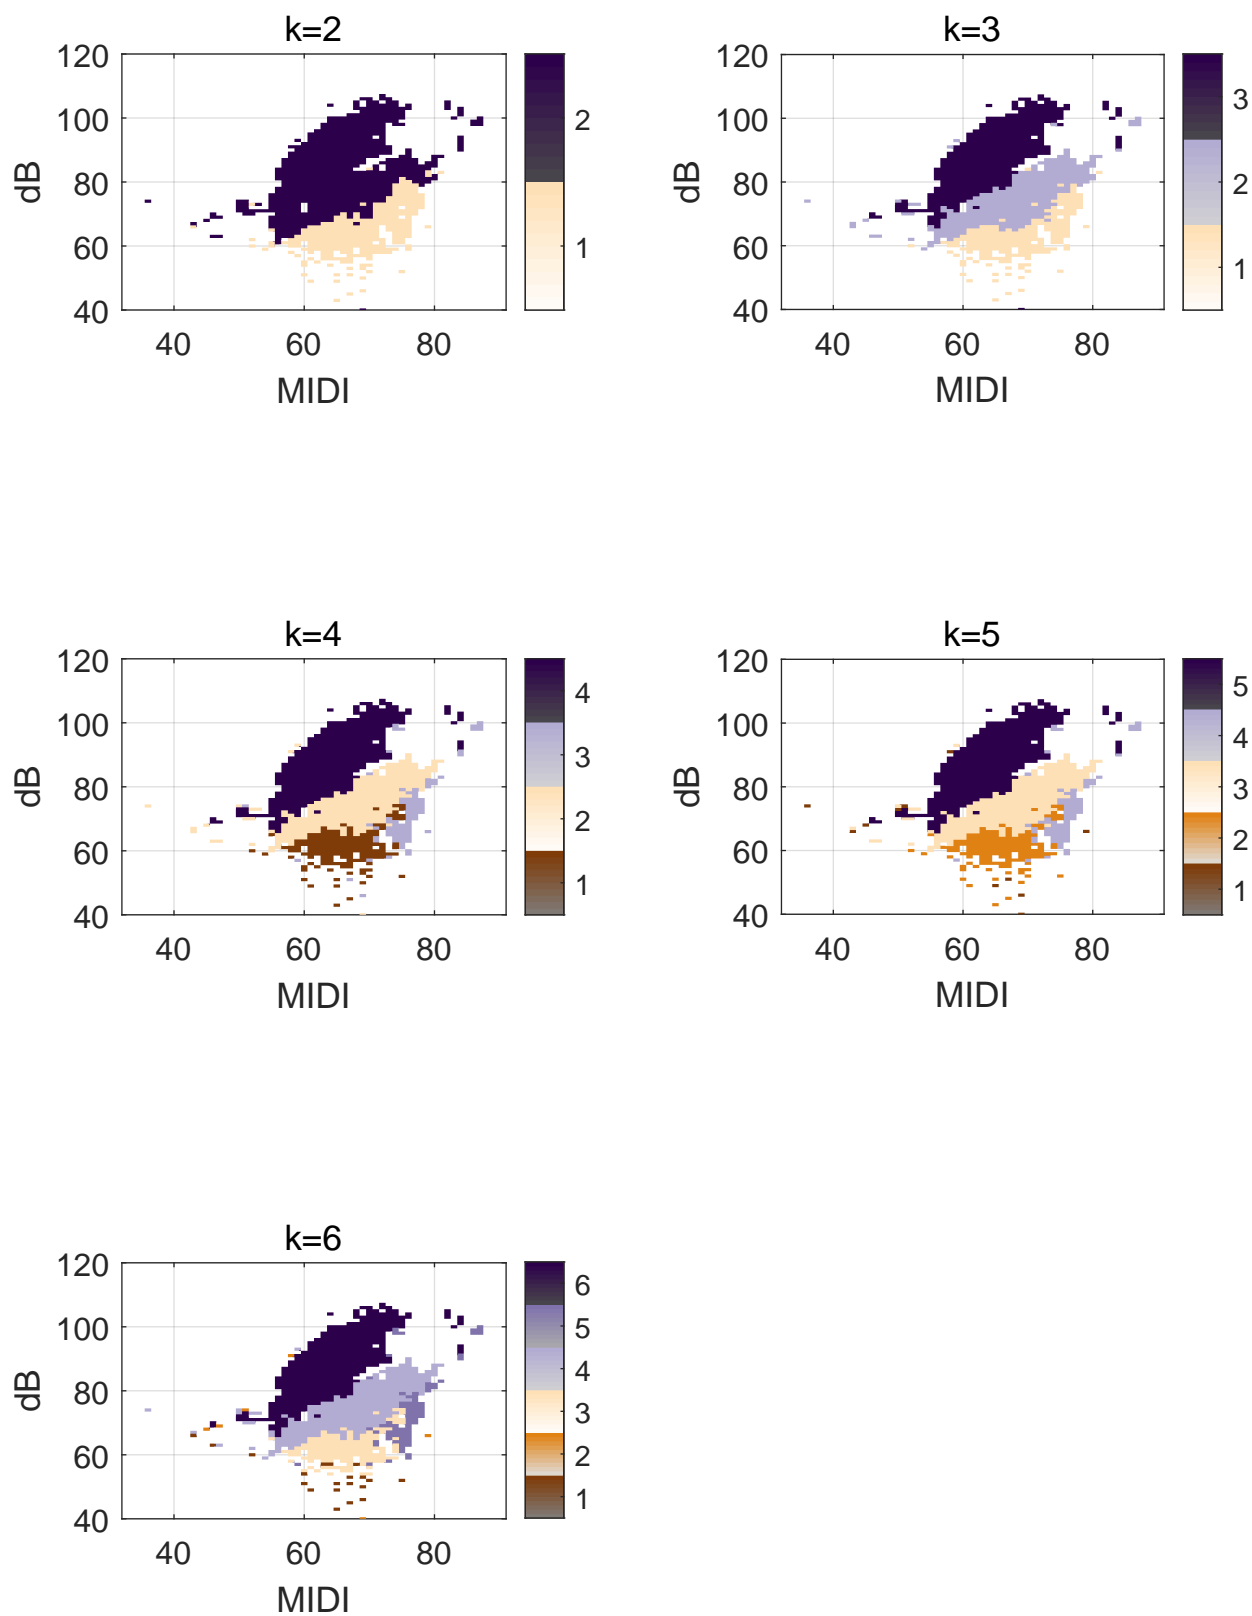

Figure S86: Acoustic and EGG Metric maps for participant G09

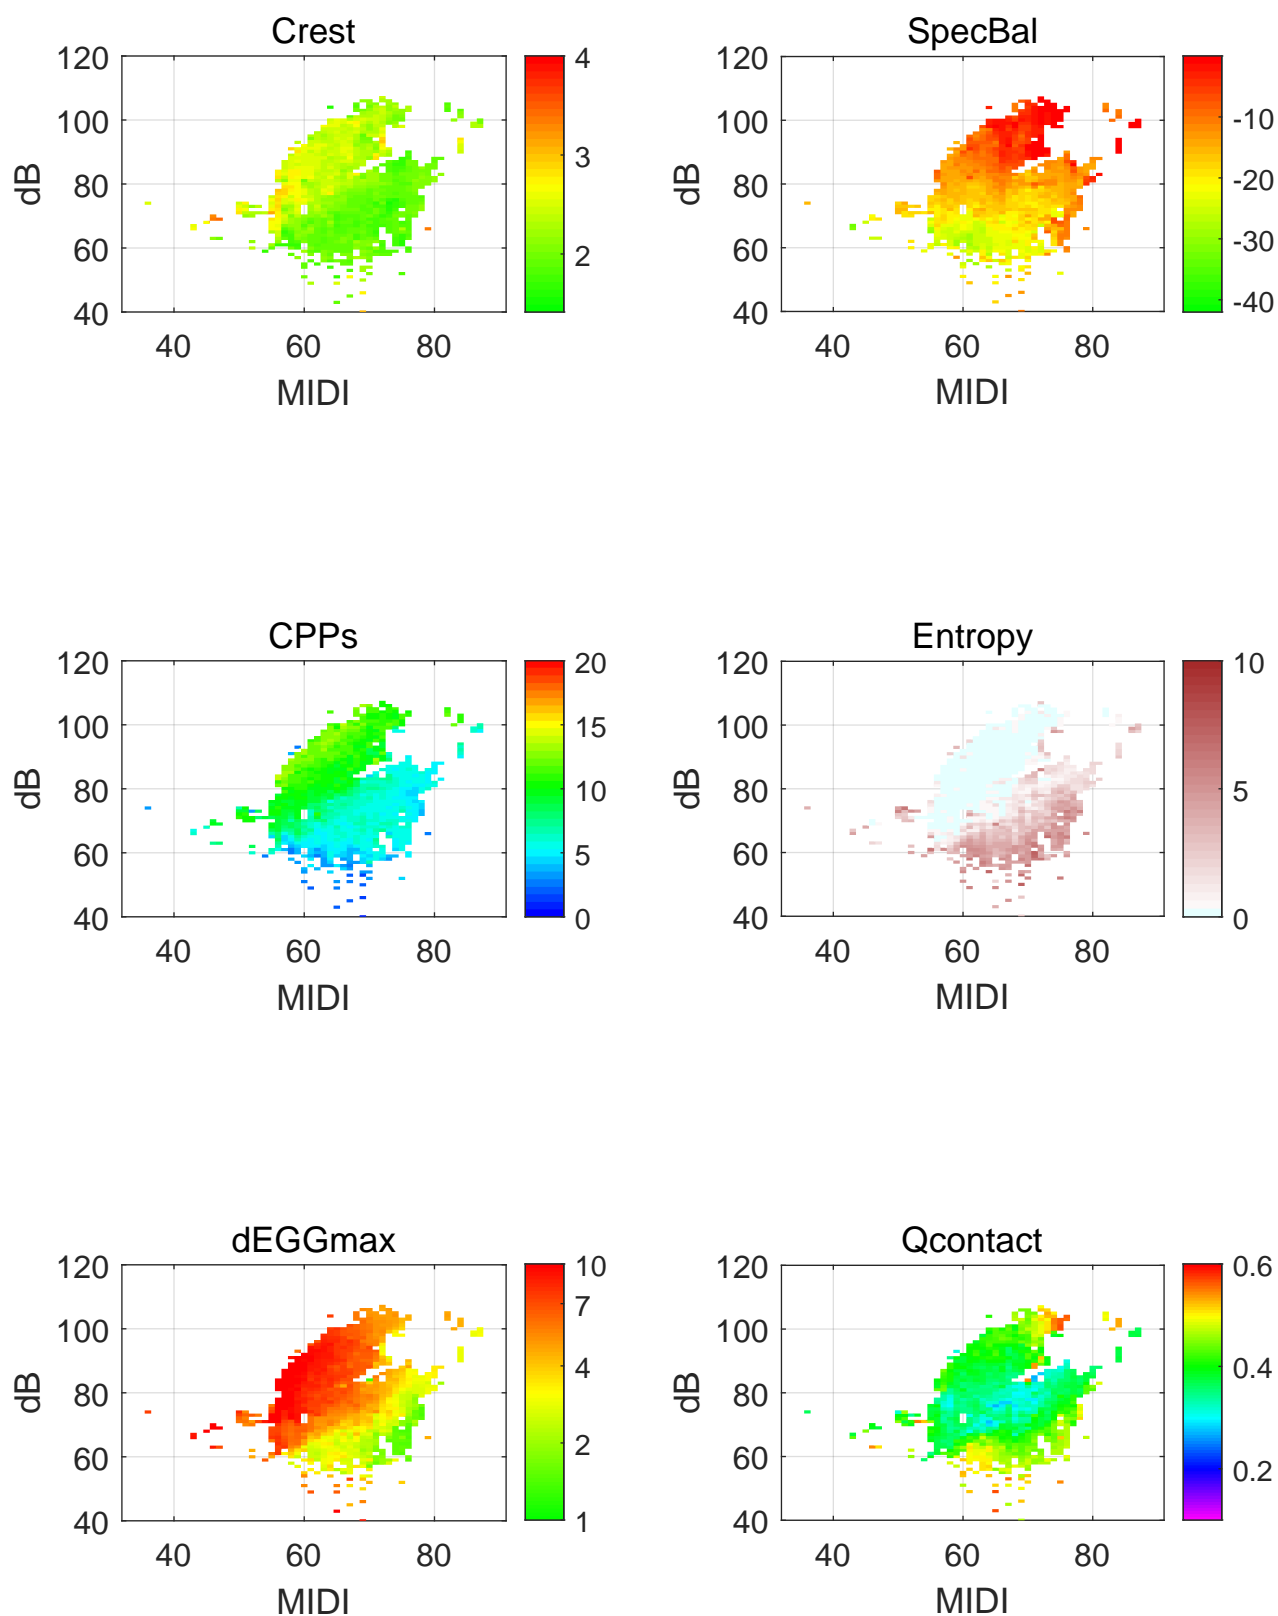

Figure S87: Classification voice maps for participant G10

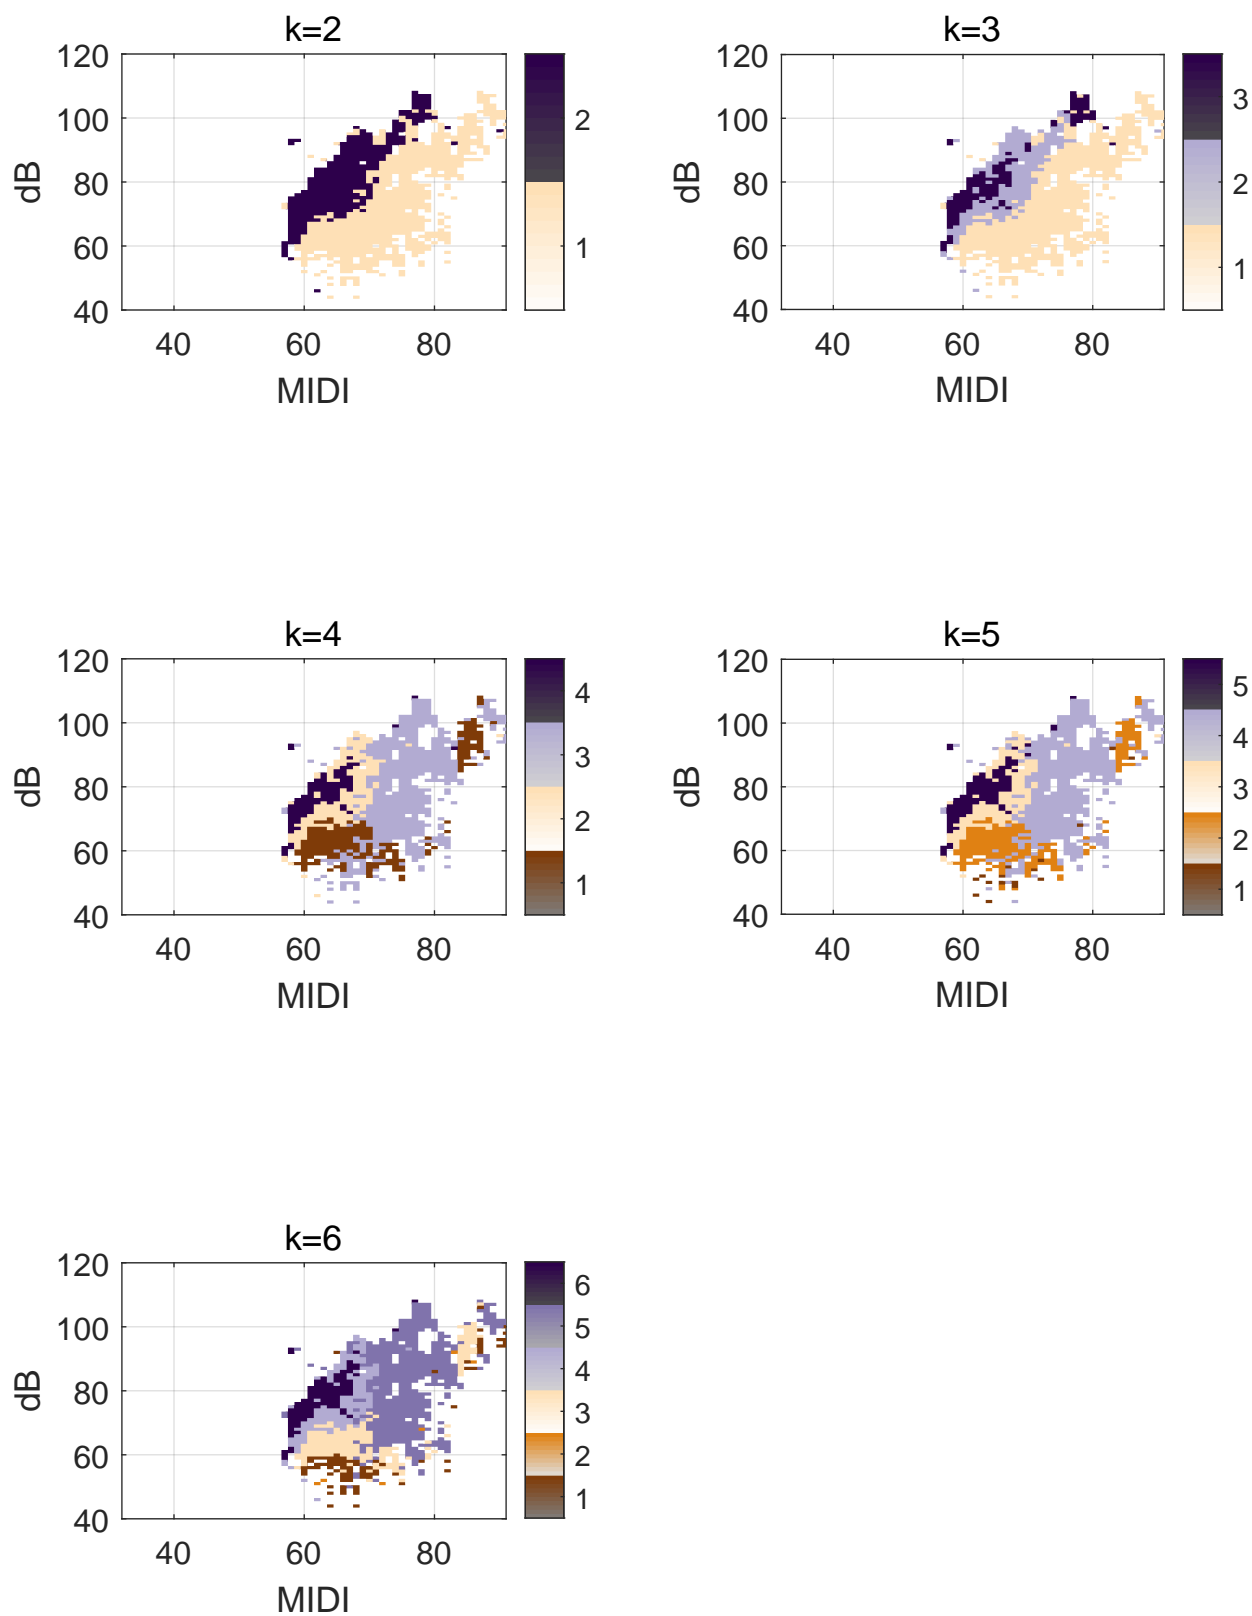

Figure S88: Acoustic and EGG Metric maps for participant G10

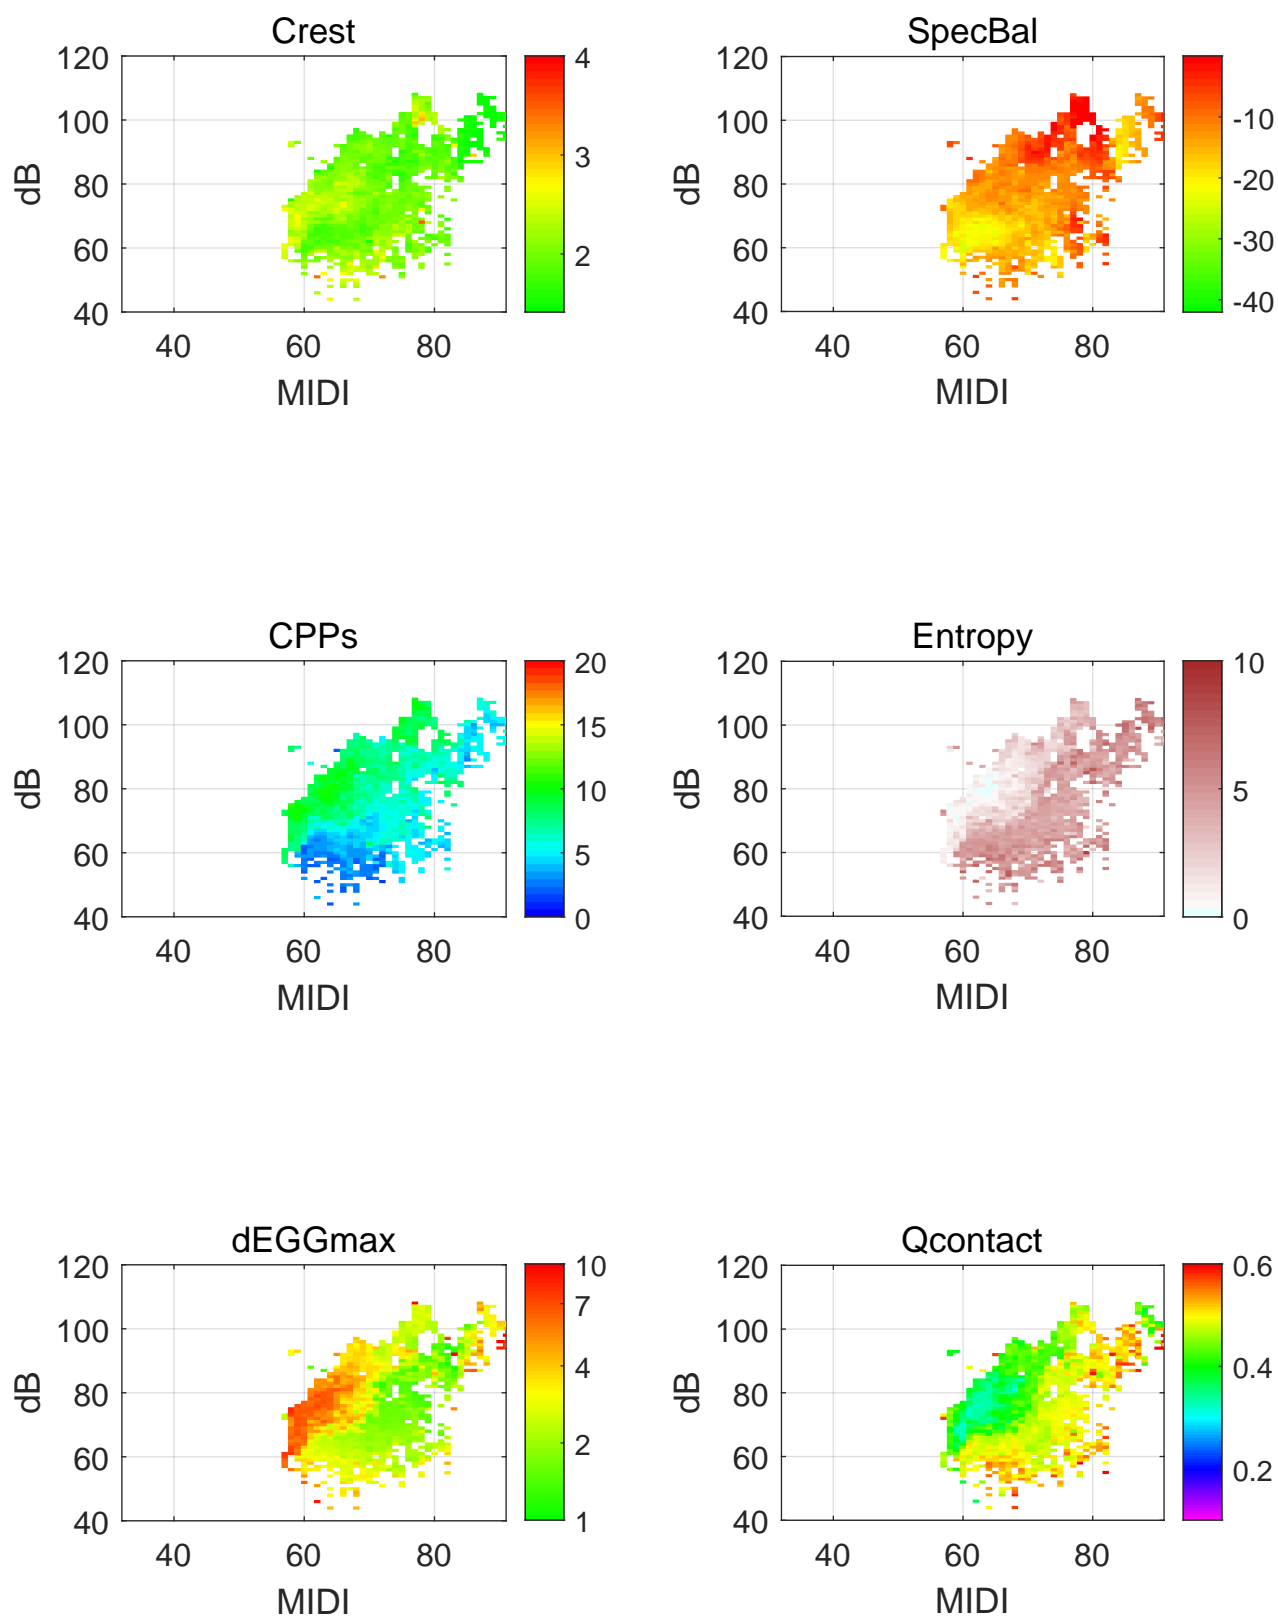

Figure S89: Classification voice maps for participant G11

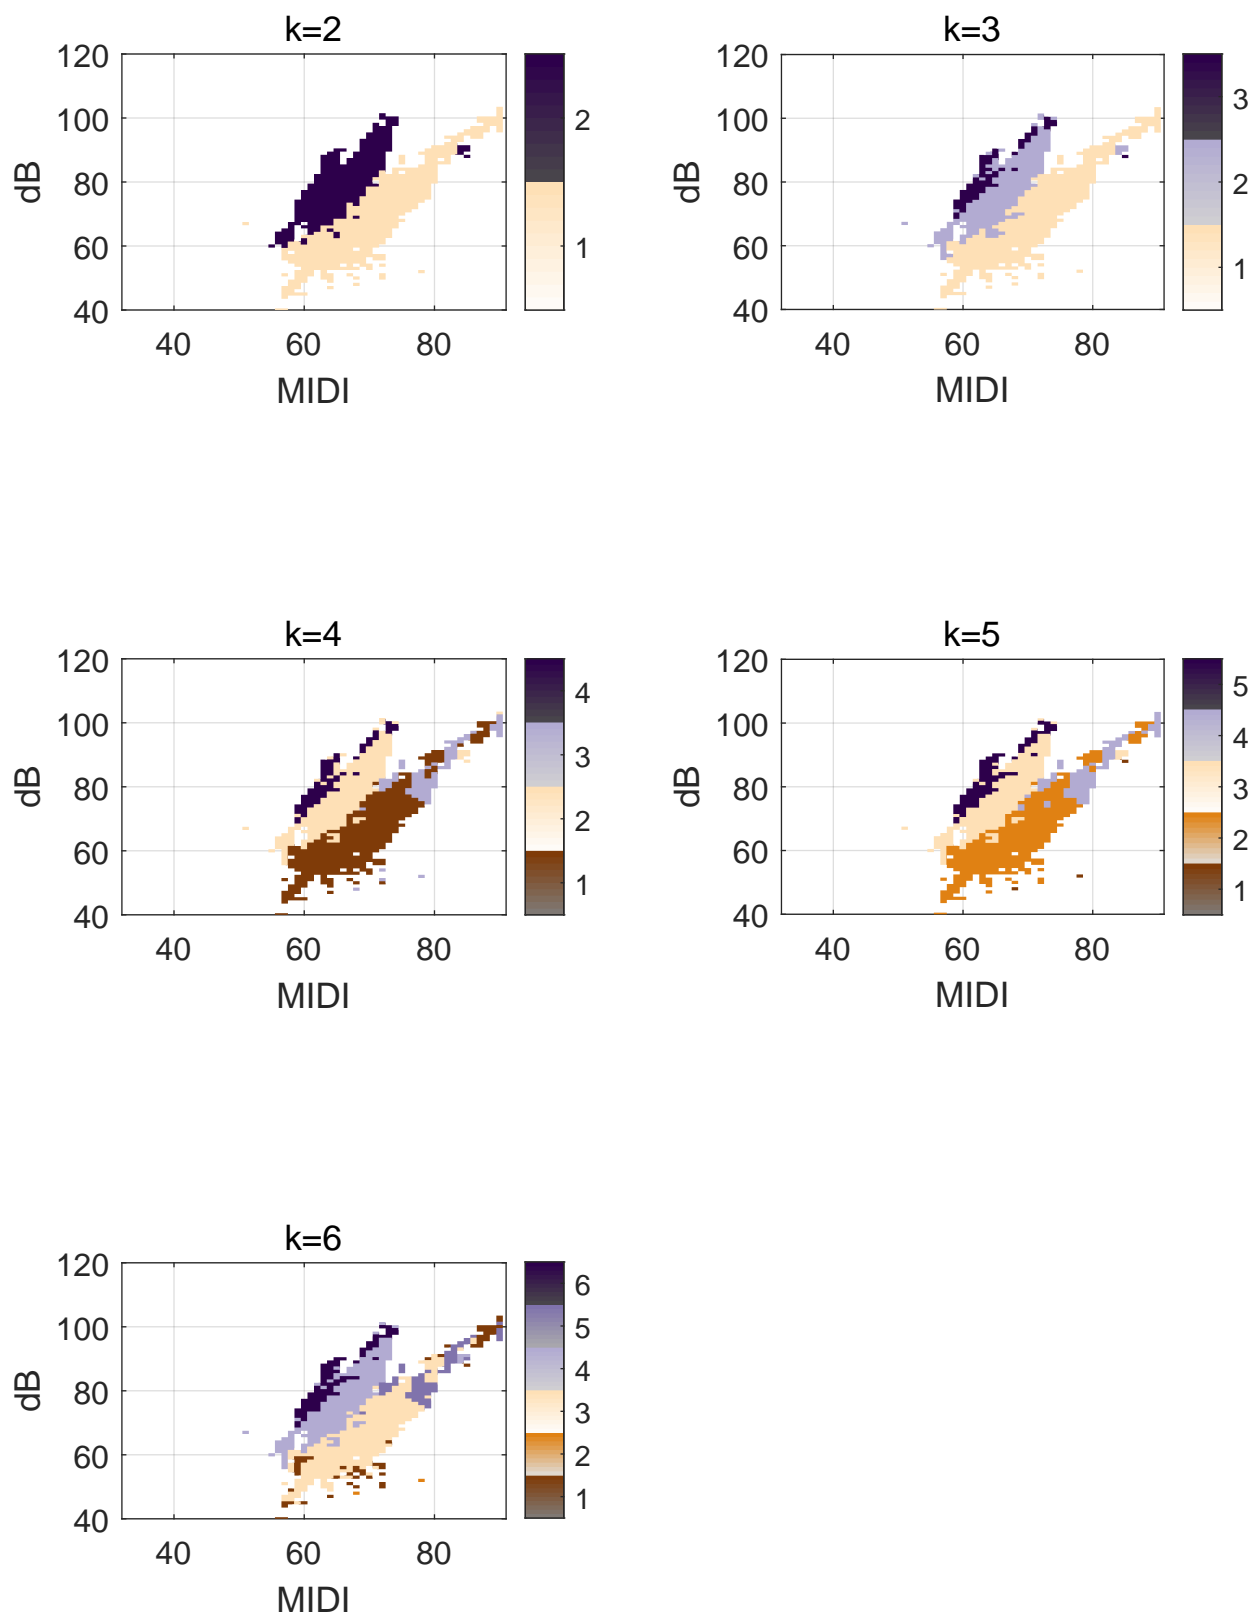

Figure S90: Acoustic and EGG Metric maps for participant G11

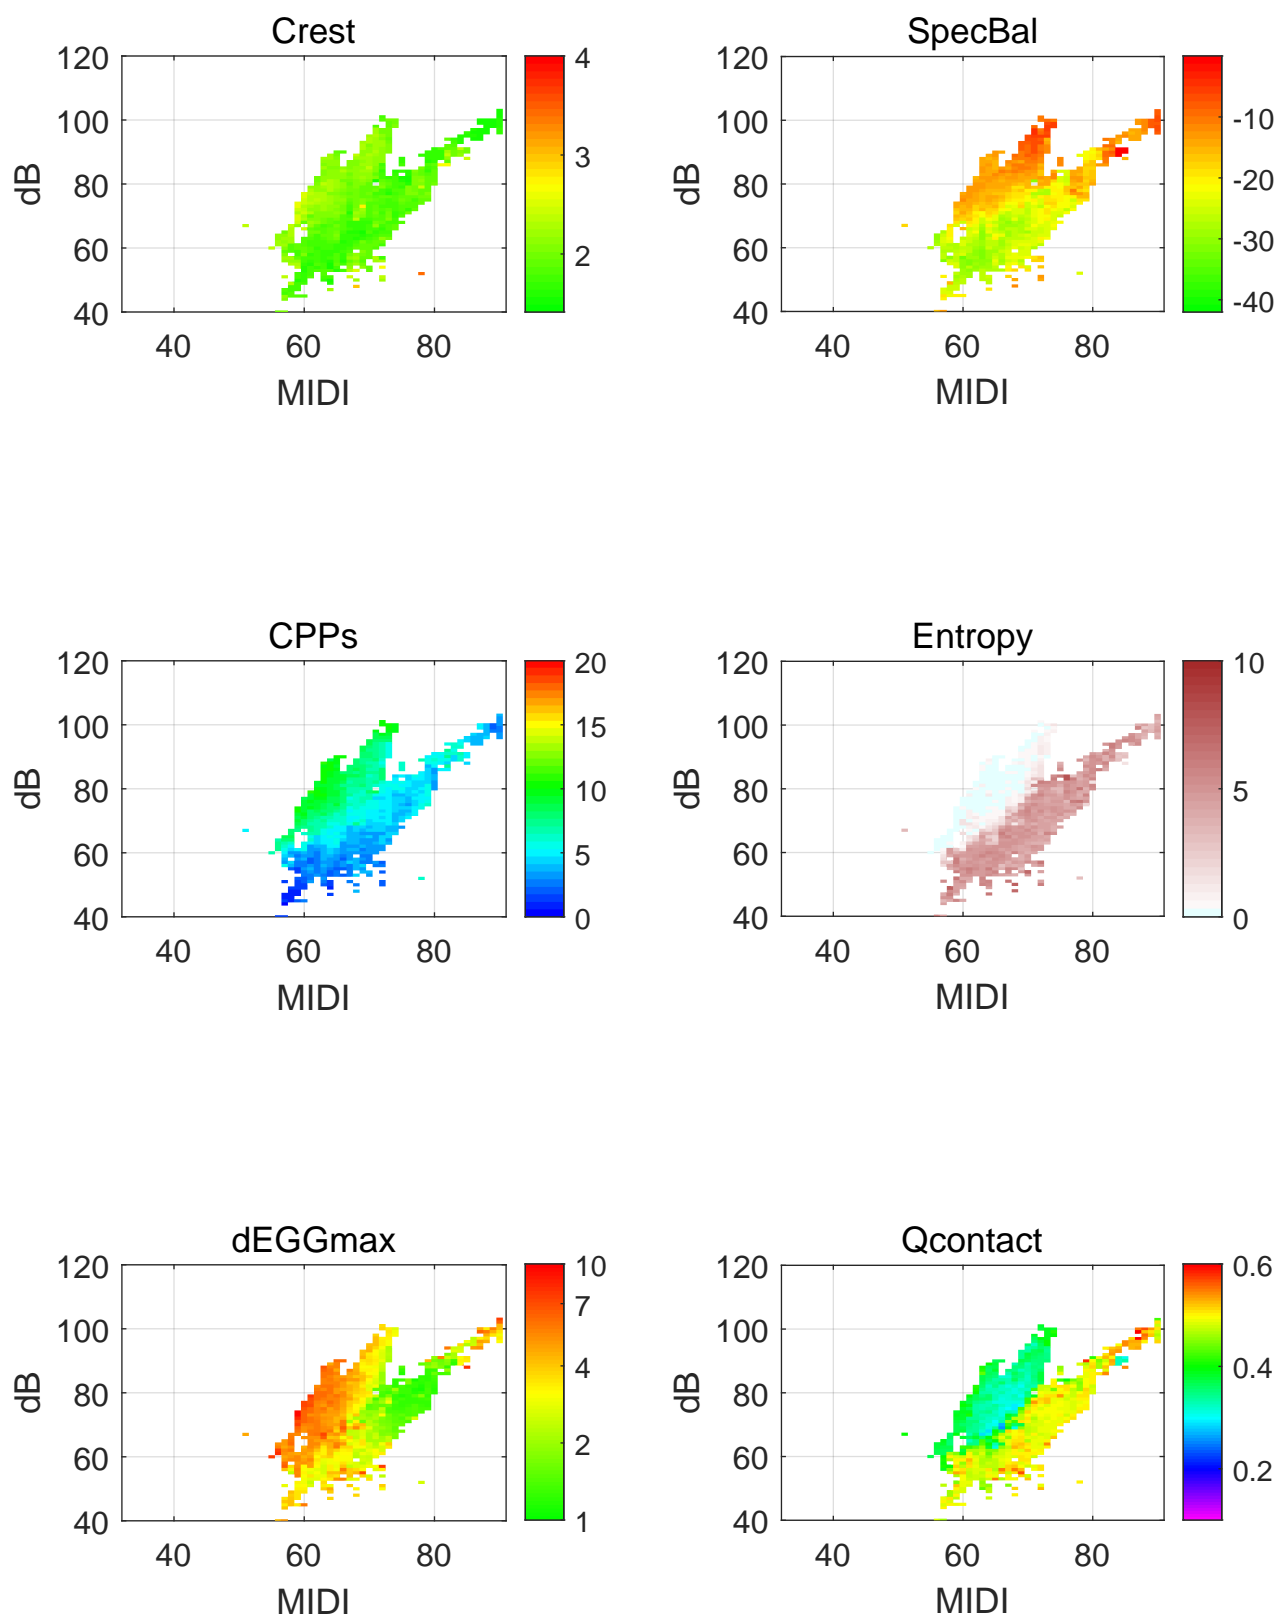

Figure S91: Classification voice maps for participant G12

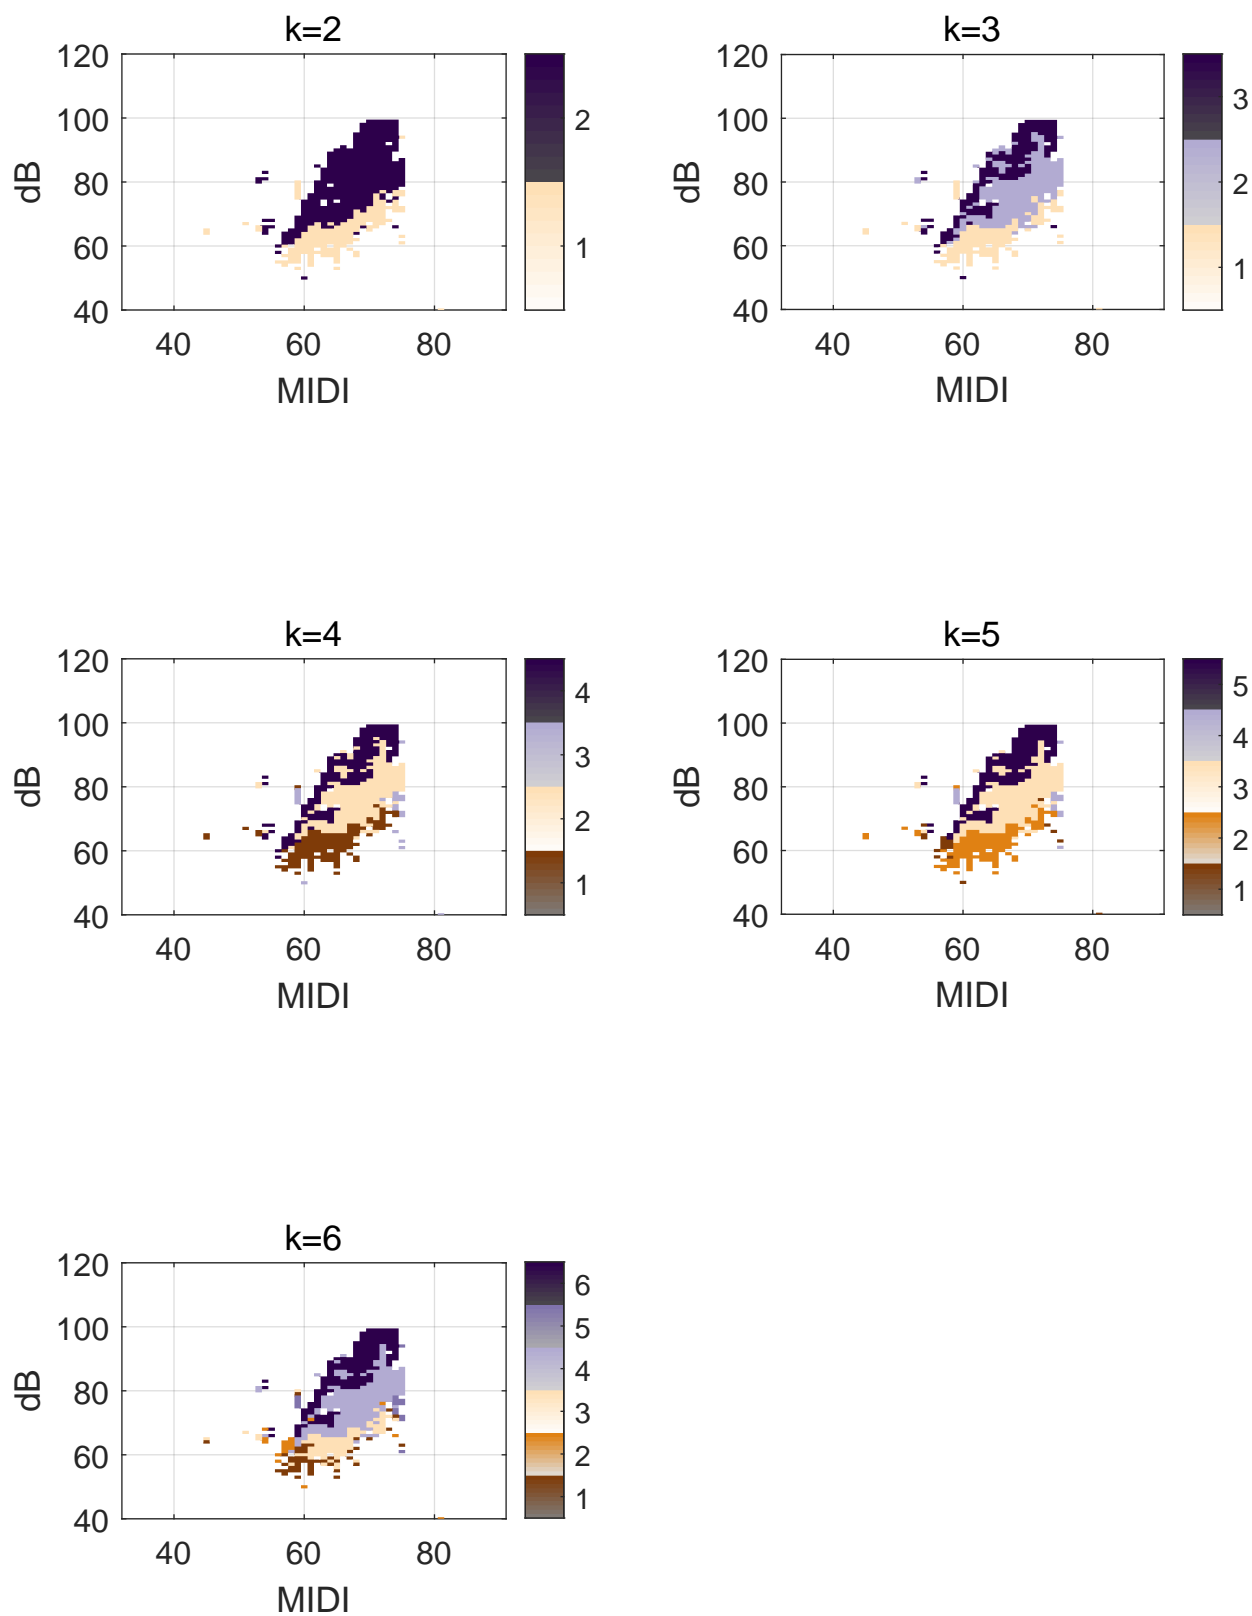



Figure S92: Acoustic and EGG Metric maps for participant G12

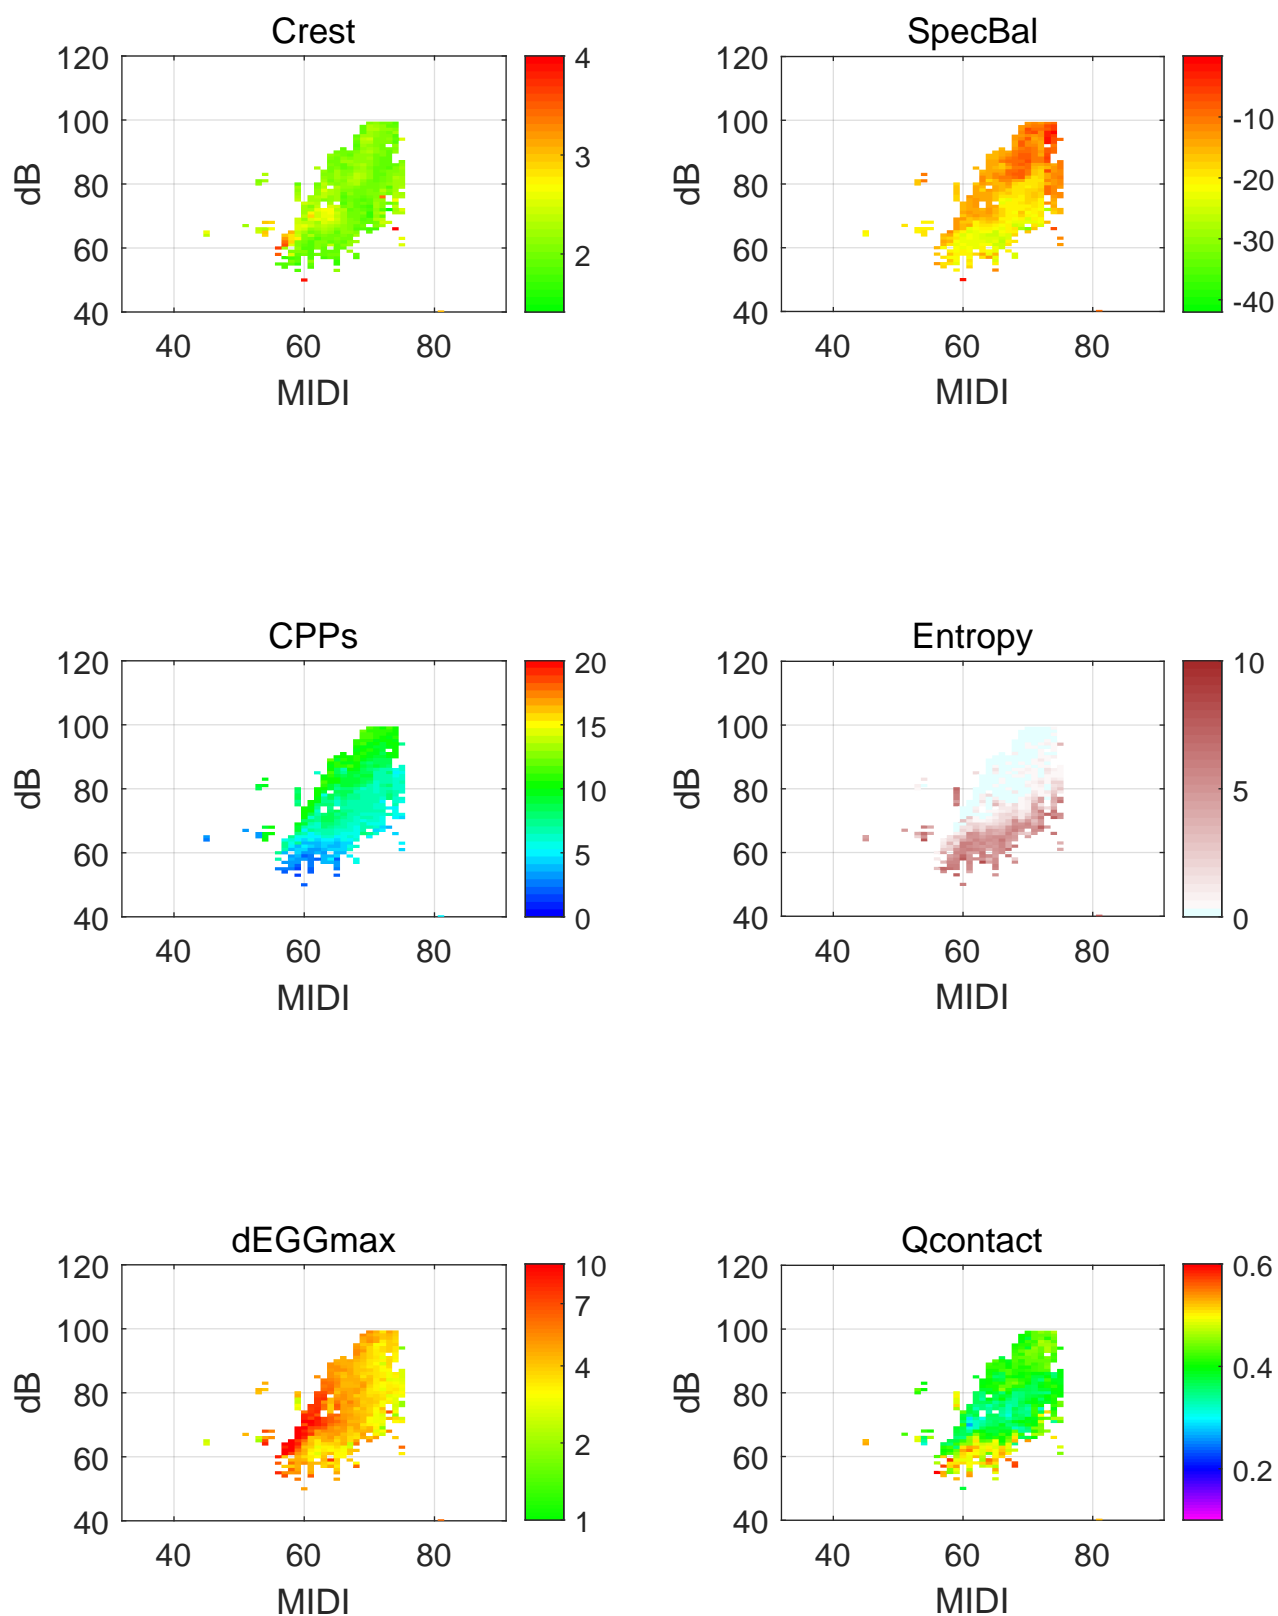

Figure S93: Classification voice maps for participant G13

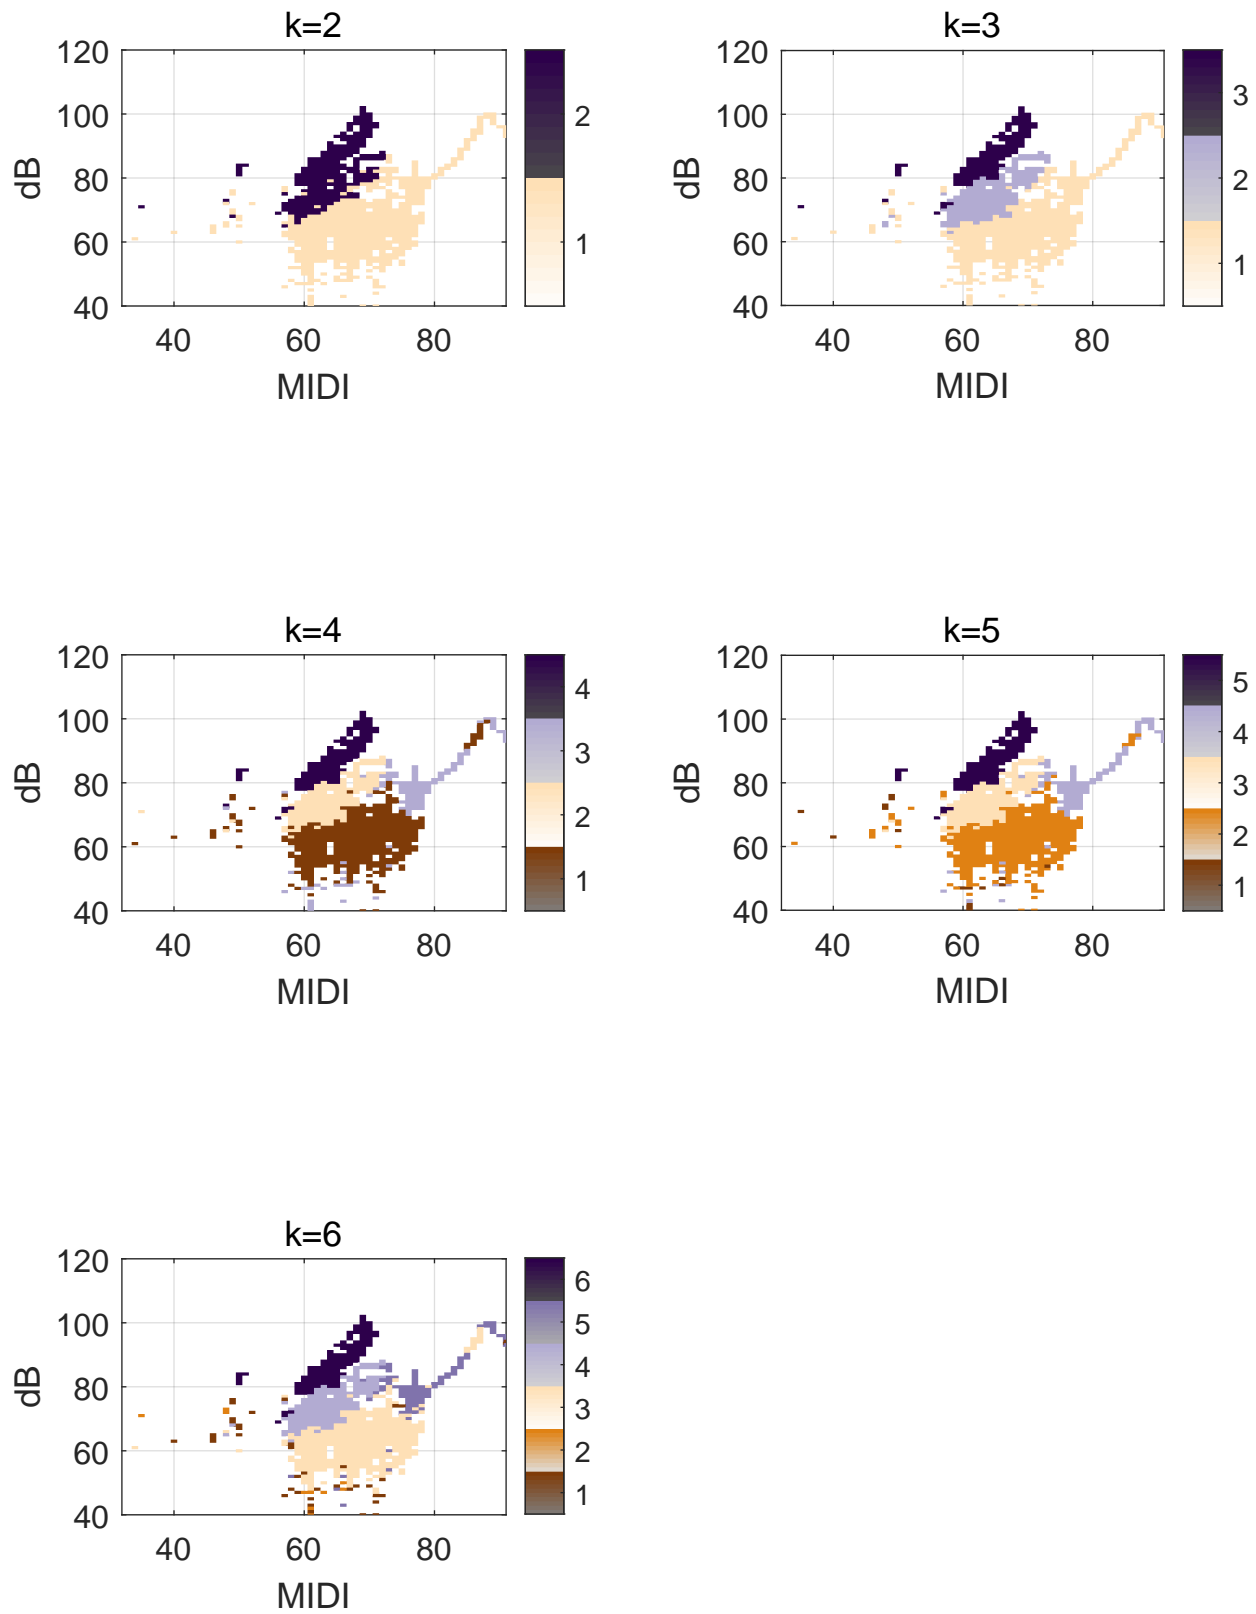

Figure S94: Acoustic and EGG Metric maps for participant G13

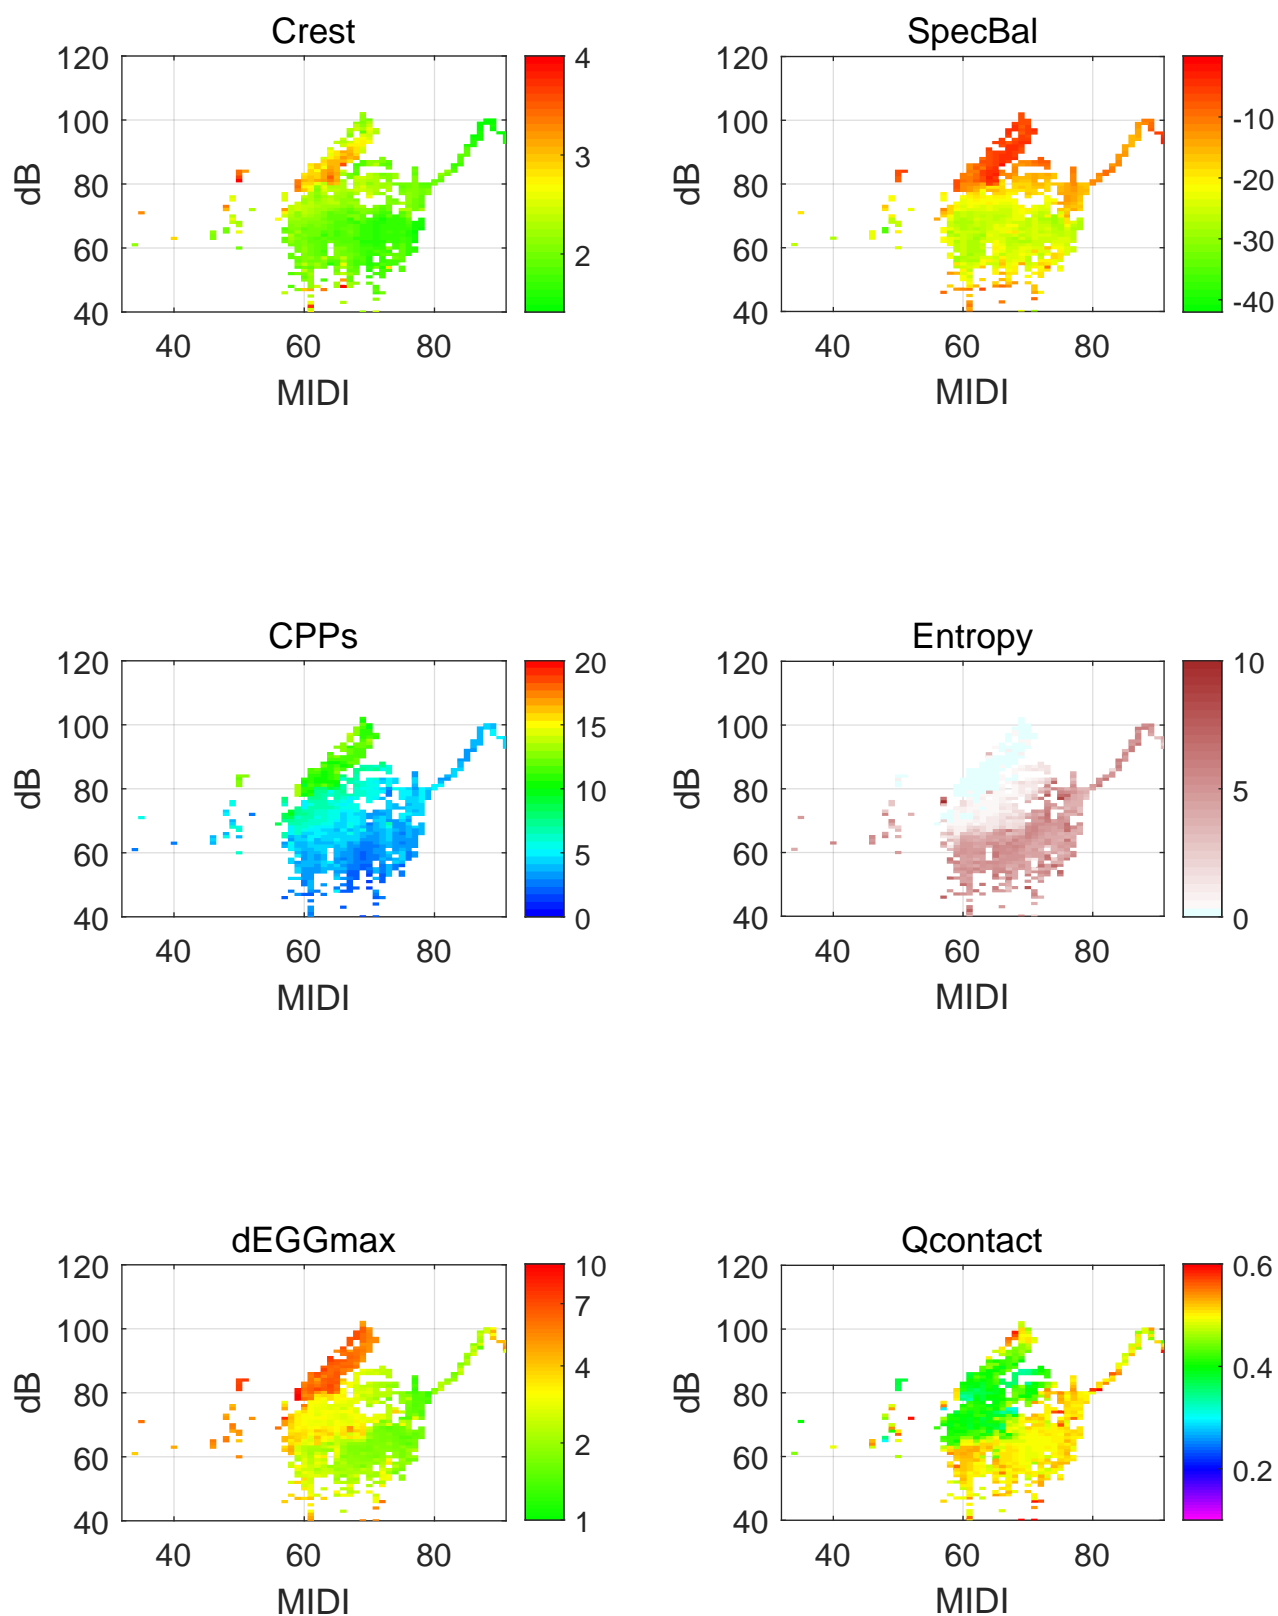

Figure S95: Classification voice maps for participant G14

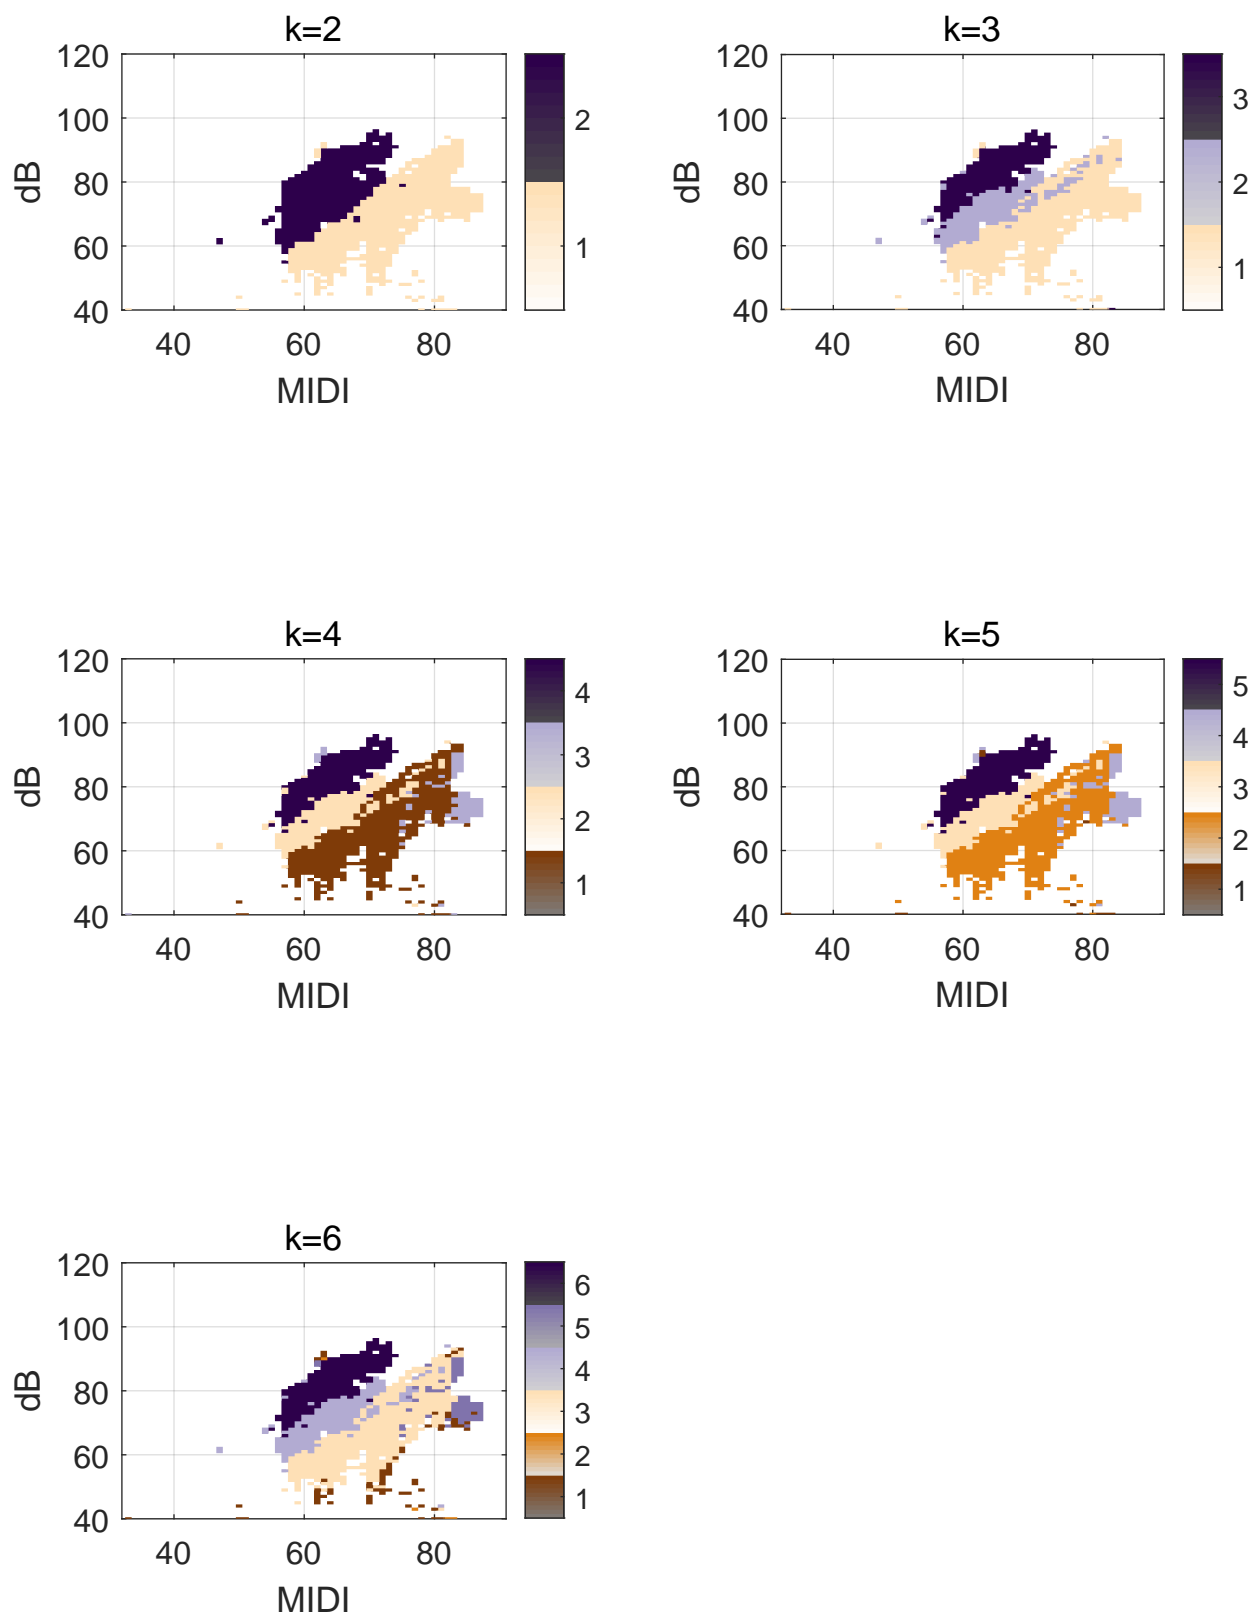

Figure S96: Acoustic and EGG Metric maps for participant G14

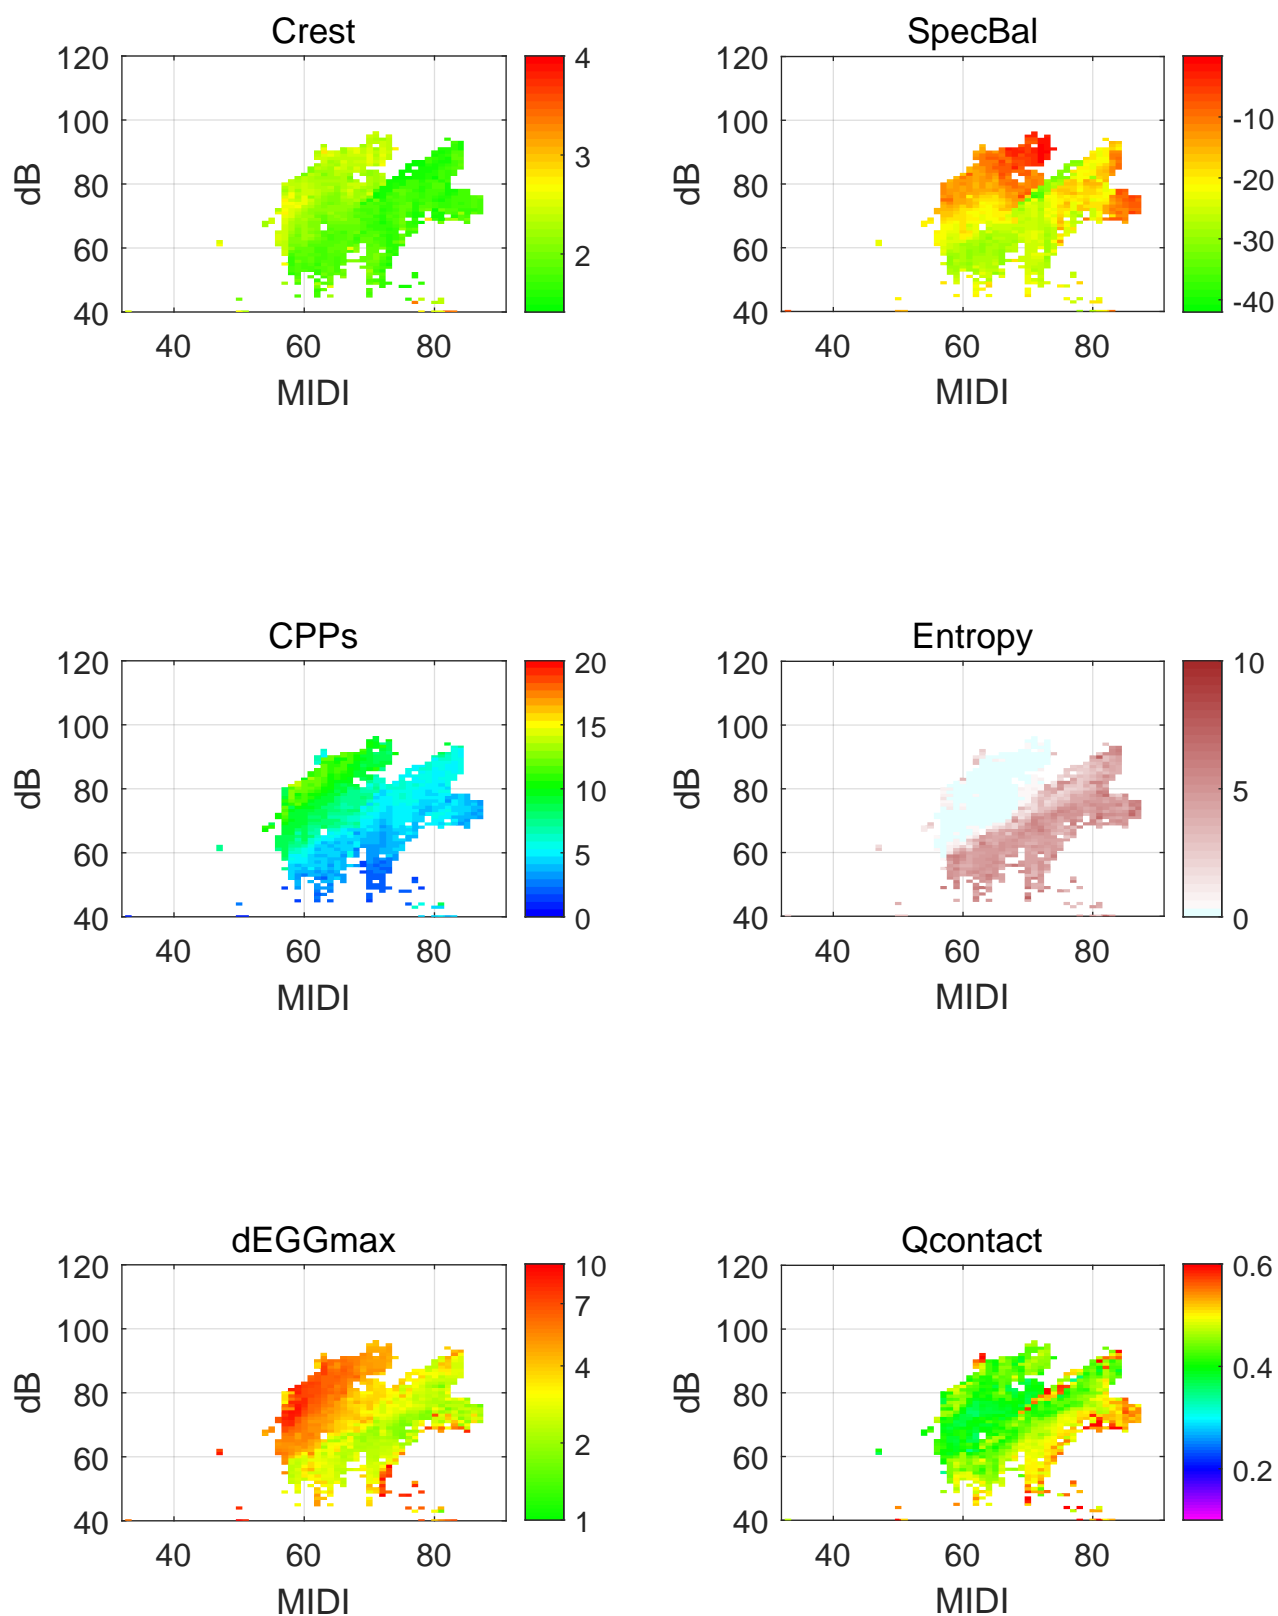

Figure S97: Centroid polar in percentage for Children group

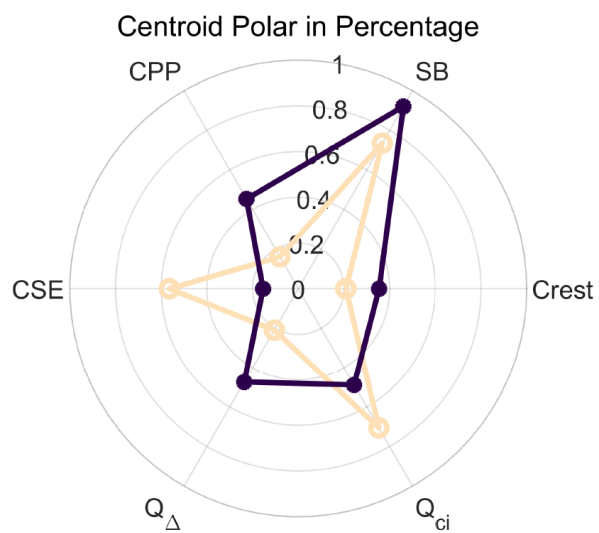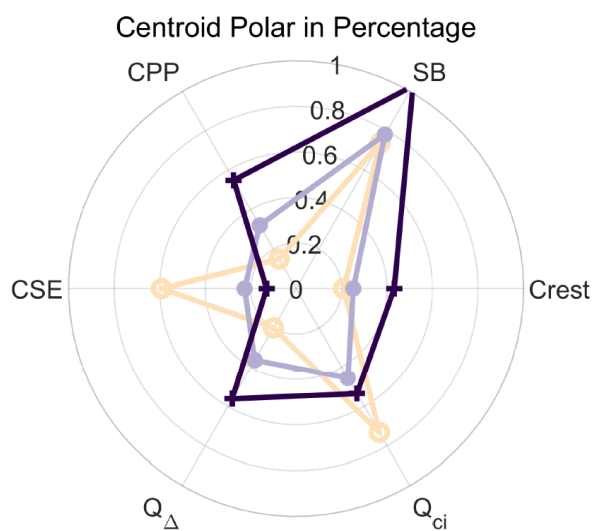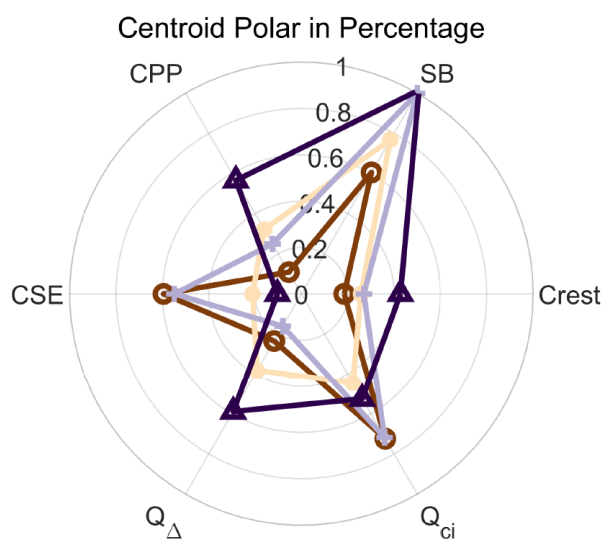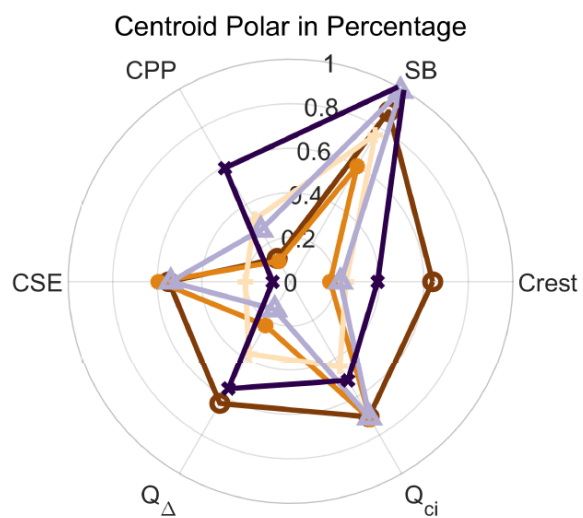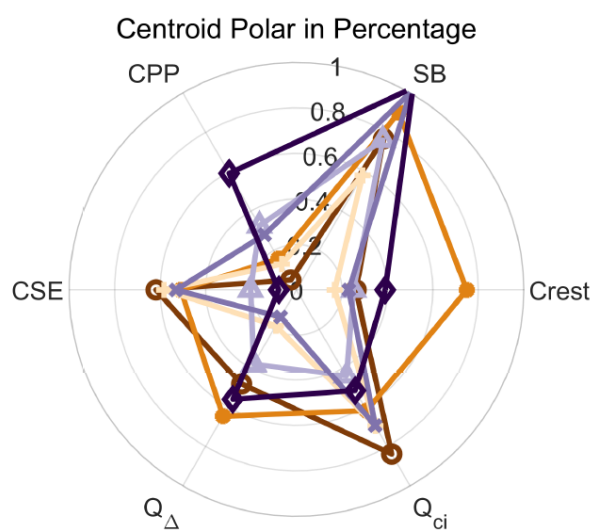

Supplement: s1 [file s1]
